# Supplementary material for: Living material assembly of bacteriogenic protocells
Source: Research Square preprint supplement (doi:10.21203/rs.3.rs-959347/v1), 2021-11-10
Supplement: Supplementary file 1 [file b52cead2b6264e80f7471a3c.xlsx]

## Sheet: Bateria
Protein FDR Confidence	Accession	Description	Contaminant	E.Coli	P.aeruginosa	Coverage	# Peptides	# PSMs	# Unique Peptides	Area: F6: Sample	Score Sequest HT
High	A0A140N9U4	Nitrate reductase subunit beta OS=Escherichia coli (strain B / BL21-DE3) OX=469008 GN=narH PE=4 SV=1	FALSE	TRUE	TRUE	1.94553	1	1	1	3.35477e+07	0
High	Q9I472	Corrinoid adenosyltransferase OS=Pseudomonas aeruginosa (strain ATCC 15692 / DSM 22644 / CIP 104116 / JCM 14847 / LMG 12228 / 1C / PRS 101 / PAO1) OX=208964 GN=cobO PE=3 SV=1	FALSE	TRUE	TRUE	3.94089	1	1	1	61821984	0
High	A0A140NH65	60 kDa chaperonin OS=Escherichia coli (strain B / BL21-DE3) OX=469008 GN=groL PE=3 SV=1	FALSE	TRUE	FALSE	86.3139	46	287	34	1.29019e+10	576.67
High	A0A140N6W0	Elongation factor Tu OS=Escherichia coli (strain B / BL21-DE3) OX=469008 GN=tuf PE=1 SV=1	FALSE	TRUE	FALSE	95.9391	41	365	33	37476313486	665.99
High	A0A140NGF8	Tryptophanase OS=Escherichia coli (strain B / BL21-DE3) OX=469008 GN=tnaA PE=3 SV=1	FALSE	TRUE	FALSE	85.138	51	234	51	3.55016e+10	381.87
High	A0A140N6A5	Chaperone protein ClpB OS=Escherichia coli (strain B / BL21-DE3) OX=469008 GN=clpB PE=3 SV=1	FALSE	TRUE	FALSE	66.5111	51	107	50	2.80292e+09	162.96
High	A0A140NHS0	ATP synthase subunit beta OS=Escherichia coli (strain B / BL21-DE3) OX=469008 GN=atpD PE=3 SV=1	FALSE	TRUE	FALSE	92.6087	33	130	26	5.89498e+09	268.43
High	A0A140NDL0	Pyruvate dehydrogenase E1 component OS=Escherichia coli (strain B / BL21-DE3) OX=469008 GN=ECBD_3505 PE=4 SV=1	FALSE	TRUE	FALSE	66.4036	54	119	53	3.28432e+09	215.17
High	A0A140NCE4	Aldehyde-alcohol dehydrogenase OS=Escherichia coli (strain B / BL21-DE3) OX=469008 GN=adhE PE=3 SV=1	FALSE	TRUE	FALSE	64.422	42	83	42	2.38819e+09	162.83
High	A0A140N6E5	D-tagatose-1,6-bisphosphate aldolase subunit GatZ OS=Escherichia coli (strain B / BL21-DE3) OX=469008 GN=gatZ PE=3 SV=1	FALSE	TRUE	FALSE	82.8571	27	209	27	1.77777e+10	448.38
High	A0A140NBS3	Dihydrolipoyl dehydrogenase OS=Escherichia coli (strain B / BL21-DE3) OX=469008 GN=lpdA PE=3 SV=1	FALSE	TRUE	FALSE	56.962	30	149	30	7.57772e+09	287.6
High	A0A140N7C7	Elongation factor G OS=Escherichia coli (strain B / BL21-DE3) OX=469008 GN=fusA PE=3 SV=1	FALSE	TRUE	FALSE	62.642	35	125	35	3.77452e+09	221.63
High	A0A140NFV3	Chaperone protein DnaK OS=Escherichia coli (strain B / BL21-DE3) OX=469008 GN=dnaK PE=2 SV=1	FALSE	TRUE	FALSE	64.5768	40	88	37	3.65336e+09	153.2
High	A0A140N753	Alpha-1,4 glucan phosphorylase OS=Escherichia coli (strain B / BL21-DE3) OX=469008 GN=ECBD_0328 PE=3 SV=1	FALSE	TRUE	FALSE	55.5834	39	87	39	1.67901e+09	123.25
High	A0A140NAN5	Porin Gram-negative type OS=Escherichia coli (strain B / BL21-DE3) OX=469008 GN=ompF PE=3 SV=1	FALSE	TRUE	FALSE	90.6077	34	292	34	1.69443e+10	695.02
High	A0A140NE28	Alpha-galactosidase OS=Escherichia coli (strain B / BL21-DE3) OX=469008 GN=melA PE=3 SV=1	FALSE	TRUE	FALSE	57.8714	27	82	27	4.33667e+09	106.9
High	A0A140N6G0	Enolase OS=Escherichia coli (strain B / BL21-DE3) OX=469008 GN=eno PE=3 SV=1	FALSE	TRUE	FALSE	81.713	28	110	28	8.48132e+09	226.5
High	A0A140ND61	Chaperone protein HtpG OS=Escherichia coli (strain B / BL21-DE3) OX=469008 GN=htpG PE=3 SV=1	FALSE	TRUE	FALSE	61.0577	39	69	36	1736018710	123.25
High	A0A140N8E1	Phosphoglycerate kinase OS=Escherichia coli (strain B / BL21-DE3) OX=469008 GN=pgk PE=3 SV=1	FALSE	TRUE	FALSE	92.7649	31	103	29	8.05072e+09	198.78
High	A0A140NH27	DNA-directed RNA polymerase subunit beta' OS=Escherichia coli (strain B / BL21-DE3) OX=469008 GN=rpoC PE=3 SV=1	FALSE	TRUE	FALSE	38.4506	43	63	36	9.82822e+08	112.86
High	A0A140SS73	Glycerol kinase OS=Escherichia coli (strain B / BL21-DE3) OX=469008 GN=glpK PE=3 SV=1	FALSE	TRUE	FALSE	69.9203	33	106	29	2.39225e+09	203.87
High	A0A140NBA5	30S ribosomal protein S1 OS=Escherichia coli (strain B / BL21-DE3) OX=469008 GN=rpsA PE=3 SV=1	FALSE	TRUE	FALSE	67.325	33	117	32	3.58578e+09	214.9
High	A0A140NF01	Transcription termination factor Rho OS=Escherichia coli (strain B / BL21-DE3) OX=469008 GN=rho PE=3 SV=1	FALSE	TRUE	FALSE	68.7351	34	94	27	2.48558e+09	176.4
High	A0A140N783	Glyceraldehyde-3-phosphate dehydrogenase OS=Escherichia coli (strain B / BL21-DE3) OX=469008 GN=gapA PE=3 SV=1	FALSE	TRUE	FALSE	92.7492	34	92	34	1.74657e+10	156.31
High	A0A140NFP9	Aconitate hydratase B OS=Escherichia coli (strain B / BL21-DE3) OX=469008 GN=acnB PE=3 SV=1	FALSE	TRUE	FALSE	50.7514	33	60	31	1.84826e+09	118.5
High	A0A140NDN9	DNA protection during starvation protein OS=Escherichia coli (strain B / BL21-DE3) OX=469008 GN=dps PE=3 SV=1	FALSE	TRUE	FALSE	91.018	22	95	22	1.4923e+10	176.83
High	A0A140NE25	Glutamine--fructose-6-phosphate aminotransferase [isomerizing] OS=Escherichia coli (strain B / BL21-DE3) OX=469008 GN=glmS PE=3 SV=1	FALSE	TRUE	FALSE	60.2627	27	51	27	1260653862	102.16
High	A0A140NE66	Oxoglutarate dehydrogenase (succinyl-transferring) OS=Escherichia coli (strain B / BL21-DE3) OX=469008 GN=sucA PE=3 SV=1	FALSE	TRUE	FALSE	43.9443	31	56	31	1.01072e+09	101.33
High	A0A140NBE7	Formate C-acetyltransferase OS=Escherichia coli (strain B / BL21-DE3) OX=469008 GN=pflB PE=3 SV=1	FALSE	TRUE	FALSE	55.1316	35	65	35	1.73606e+09	126.91
High	A0A140ND72	ATP synthase subunit alpha OS=Escherichia coli (strain B / BL21-DE3) OX=469008 GN=atpA PE=3 SV=1	FALSE	TRUE	FALSE	57.115	27	88	25	5.00865e+09	157.25
High	A0A140NFK2	30S ribosomal protein S2 OS=Escherichia coli (strain B / BL21-DE3) OX=469008 GN=rpsB PE=3 SV=1	FALSE	TRUE	FALSE	64.7303	21	66	17	5.25705e+09	122.99
High	A0A140N2U0	DNA-directed RNA polymerase subunit alpha OS=Escherichia coli (strain B / BL21-DE3) OX=469008 GN=rpoA PE=3 SV=1	FALSE	TRUE	FALSE	90.2736	30	81	24	3.68803e+09	125.74
High	A0A140NE27	Acetyltransferase component of pyruvate dehydrogenase complex OS=Escherichia coli (strain B / BL21-DE3) OX=469008 GN=aceF PE=3 SV=1	FALSE	TRUE	FALSE	61.1111	33	63	33	1.9145e+09	112.85
High	A0A140N487	2-amino-3-ketobutyrate coenzyme A ligase OS=Escherichia coli (strain B / BL21-DE3) OX=469008 GN=kbl PE=3 SV=1	FALSE	TRUE	FALSE	64.0704	20	70	20	3.12908e+09	153.22
High	A0A140NE14	Lysine--tRNA ligase OS=Escherichia coli (strain B / BL21-DE3) OX=469008 GN=lysS PE=3 SV=1	FALSE	TRUE	FALSE	60.9901	32	78	24	3.68923e+09	143.61
High	A0A140N4G4	Glycine dehydrogenase (decarboxylating) OS=Escherichia coli (strain B / BL21-DE3) OX=469008 GN=gcvP PE=3 SV=1	FALSE	TRUE	FALSE	46.9175	26	43	26	1.29598e+09	85.88
High	A0A140NCD0	Maltodextrin-binding protein OS=Escherichia coli (strain B / BL21-DE3) OX=469008 GN=malE PE=3 SV=1	FALSE	TRUE	FALSE	75.2525	29	51	29	2.19631e+09	91.59
High	A0A140NAN3	Isocitrate dehydrogenase [NADP] OS=Escherichia coli (strain B / BL21-DE3) OX=469008 GN=icd PE=3 SV=1	FALSE	TRUE	FALSE	65.3846	29	68	24	5.37311e+09	92.39
High	A0A140NDE3	Outer membrane protein A OS=Escherichia coli (strain B / BL21-DE3) OX=469008 GN=ompA PE=3 SV=1	FALSE	TRUE	FALSE	74.8555	23	94	23	2.40227e+10	190.46
High	A0A140NDV9	Transaldolase OS=Escherichia coli (strain B / BL21-DE3) OX=469008 GN=tal PE=3 SV=1	FALSE	TRUE	FALSE	79.1798	25	63	24	2.49985e+09	106.22
High	A0A140NDX4	Dihydrolipoyllysine-residue succinyltransferase component of 2-oxoglutarate dehydrogenase complex OS=Escherichia coli (strain B / BL21-DE3) OX=469008 GN=odhB PE=3 SV=1	FALSE	TRUE	FALSE	49.6296	21	64	21	3.78809e+09	127.1
High	A0A140N510	Phosphoenolpyruvate carboxykinase (ATP) OS=Escherichia coli (strain B / BL21-DE3) OX=469008 GN=pckA PE=3 SV=1	FALSE	TRUE	FALSE	61.8519	25	70	25	2.76433e+09	108.94
High	A0A140NDE0	Proline--tRNA ligase OS=Escherichia coli (strain B / BL21-DE3) OX=469008 GN=proS PE=3 SV=1	FALSE	TRUE	FALSE	62.2378	27	52	24	9.25799e+08	99.76
High	A0A140N821	Fructose-bisphosphate aldolase OS=Escherichia coli (strain B / BL21-DE3) OX=469008 GN=fbaA PE=3 SV=1	FALSE	TRUE	FALSE	72.4234	16	50	16	6.71119e+09	95.67
High	A0A140NFM6	Cell division protein FtsZ OS=Escherichia coli (strain B / BL21-DE3) OX=469008 GN=ftsZ PE=3 SV=1	FALSE	TRUE	FALSE	77.5457	25	48	24	2091271601	81.5
High	A0A140NA92	3-oxoacyl-[acyl-carrier-protein] synthase 2 OS=Escherichia coli (strain B / BL21-DE3) OX=469008 GN=fabF PE=3 SV=1	FALSE	TRUE	FALSE	78.2082	20	56	20	3.01563e+09	125.82
High	A0A140N8X9	Serine hydroxymethyltransferase OS=Escherichia coli (strain B / BL21-DE3) OX=469008 GN=glyA PE=3 SV=1	FALSE	TRUE	FALSE	60.4317	21	65	19	4.15112e+09	123.26
High	A0A140N7J1	50S ribosomal protein L2 OS=Escherichia coli (strain B / BL21-DE3) OX=469008 GN=rplB PE=3 SV=1	FALSE	TRUE	FALSE	67.7656	21	58	19	5.74135e+09	84.59
High	A0A140NDB1	Aminoacyl-histidine dipeptidase OS=Escherichia coli (strain B / BL21-DE3) OX=469008 GN=pepD PE=4 SV=1	FALSE	TRUE	FALSE	51.7526	21	47	21	2.08175e+09	86.84
High	A0A140NC10	Citrate synthase OS=Escherichia coli (strain B / BL21-DE3) OX=469008 GN=gltA PE=3 SV=1	FALSE	TRUE	FALSE	66.9789	18	81	18	6.0015e+09	173.3
High	A0A140N775	Malate dehydrogenase OS=Escherichia coli (strain B / BL21-DE3) OX=469008 GN=mdh PE=3 SV=1	FALSE	TRUE	FALSE	91.6667	21	83	21	4.36637e+09	175.51
High	A0A140NET2	Trigger factor OS=Escherichia coli (strain B / BL21-DE3) OX=469008 GN=tig PE=3 SV=1	FALSE	TRUE	FALSE	66.6667	34	78	34	2.88146e+09	156.24
High	A0A140NEK1	Adenylosuccinate synthetase OS=Escherichia coli (strain B / BL21-DE3) OX=469008 GN=purA PE=3 SV=1	FALSE	TRUE	FALSE	61.8056	29	64	26	1.84864e+09	85.46
High	A0A140N5A3	50S ribosomal protein L5 OS=Escherichia coli (strain B / BL21-DE3) OX=469008 GN=rplE PE=3 SV=1	FALSE	TRUE	FALSE	81.0056	20	77	20	1.42956e+10	114.21
High	A0A140NC97	Alkyl hydroperoxide reductase C OS=Escherichia coli (strain B / BL21-DE3) OX=469008 GN=ahpC PE=1 SV=1	FALSE	TRUE	FALSE	77.0053	20	66	20	3292927022	98.93
High	A0A140NGN0	Aspartate ammonia-lyase OS=Escherichia coli (strain B / BL21-DE3) OX=469008 GN=aspA PE=3 SV=1	FALSE	TRUE	FALSE	65.272	25	78	25	5.45472e+09	129.01
High	A0A140N810	Transketolase OS=Escherichia coli (strain B / BL21-DE3) OX=469008 GN=tkt PE=3 SV=1	FALSE	TRUE	FALSE	51.4329	24	47	23	3.17421e+09	89.57
High	A0A140N9P3	NADH-quinone oxidoreductase OS=Escherichia coli (strain B / BL21-DE3) OX=469008 GN=nuoG PE=3 SV=1	FALSE	TRUE	FALSE	47.467	28	44	28	9.55536e+08	90.08
High	A0A140N4N4	Peptidase B OS=Escherichia coli (strain B / BL21-DE3) OX=469008 GN=pepB PE=3 SV=1	FALSE	TRUE	FALSE	77.7518	28	48	28	1.70624e+09	86.5
High	A0A140N6W9	Alanine--tRNA ligase OS=Escherichia coli (strain B / BL21-DE3) OX=469008 GN=alaS PE=3 SV=1	FALSE	TRUE	FALSE	43.6073	29	50	29	6.84872e+08	95.52
High	A0A140N870	Alcohol dehydrogenase GroES domain protein OS=Escherichia coli (strain B / BL21-DE3) OX=469008 GN=gatD PE=3 SV=1	FALSE	TRUE	FALSE	67.6301	22	70	22	7.30502e+09	119.65
High	A0A140NEF7	Phosphopentomutase OS=Escherichia coli (strain B / BL21-DE3) OX=469008 GN=deoB PE=3 SV=1	FALSE	TRUE	FALSE	79.1155	25	53	25	1.42486e+09	88.34
High	A0A140N8Y0	Fumarate hydratase class I OS=Escherichia coli (strain B / BL21-DE3) OX=469008 GN=fumB PE=3 SV=1	FALSE	TRUE	FALSE	49.635	20	43	20	1.56599e+09	97.71
High	A0A140N6Z9	30S ribosomal protein S5 OS=Escherichia coli (strain B / BL21-DE3) OX=469008 GN=rpsE PE=3 SV=1	FALSE	TRUE	FALSE	83.2335	15	86	13	5.32126e+09	143.32
High	A0A140NA84	Phosphate acetyltransferase OS=Escherichia coli (strain B / BL21-DE3) OX=469008 GN=pta PE=3 SV=1	FALSE	TRUE	FALSE	39.2157	24	47	24	9.51406e+08	88.89
High	A0A140SS80	DNA-directed RNA polymerase subunit beta OS=Escherichia coli (strain B / BL21-DE3) OX=469008 GN=rpoB PE=3 SV=1	FALSE	TRUE	FALSE	30.924	33	46	32	4.11372e+08	83.49
High	A0A140N2U8	Glycine--tRNA ligase beta subunit OS=Escherichia coli (strain B / BL21-DE3) OX=469008 GN=glyS PE=3 SV=1	FALSE	TRUE	FALSE	52.9753	27	40	27	6.92882e+08	73.27
High	A0A140NGH2	Energy-dependent translational throttle protein EttA OS=Escherichia coli (strain B / BL21-DE3) OX=469008 GN=ettA PE=3 SV=1	FALSE	TRUE	FALSE	56.3964	22	34	21	999791877	56.91
High	A0A140NF66	Catalase-peroxidase OS=Escherichia coli (strain B / BL21-DE3) OX=469008 GN=katG PE=3 SV=1	FALSE	TRUE	FALSE	43.8017	30	61	30	9.42983e+08	99.92
High	A0A140N745	NADH-quinone oxidoreductase subunit C/D OS=Escherichia coli (strain B / BL21-DE3) OX=469008 GN=nuoC PE=3 SV=1	FALSE	TRUE	FALSE	59.8333	32	47	28	1.1975e+09	67.69
High	A0A140N4K1	30S ribosomal protein S3 OS=Escherichia coli (strain B / BL21-DE3) OX=469008 GN=rpsC PE=3 SV=1	FALSE	TRUE	FALSE	70.3863	19	51	16	5.47042e+09	78.04
High	A0A140ND68	Aminotransferase OS=Escherichia coli (strain B / BL21-DE3) OX=469008 GN=aspC PE=3 SV=1	FALSE	TRUE	FALSE	57.5758	25	69	25	3.4351e+09	130.47
High	A0A140N7U4	6-phosphogluconate dehydrogenase, decarboxylating OS=Escherichia coli (strain B / BL21-DE3) OX=469008 GN=gndA PE=3 SV=1	FALSE	TRUE	FALSE	66.453	28	44	28	3.335e+09	74.7
High	A0A140N8S8	Lysine--tRNA ligase OS=Escherichia coli (strain B / BL21-DE3) OX=469008 GN=lysS PE=3 SV=1	FALSE	TRUE	FALSE	49.901	25	59	17	8.00756e+08	97.08
High	A0A140N9D9	2,3-bisphosphoglycerate-dependent phosphoglycerate mutase OS=Escherichia coli (strain B / BL21-DE3) OX=469008 GN=gpmA PE=3 SV=1	FALSE	TRUE	FALSE	64	21	50	21	2.52967e+09	76.55
High	A0A140NGV6	Valine--tRNA ligase OS=Escherichia coli (strain B / BL21-DE3) OX=469008 GN=valS PE=3 SV=1	FALSE	TRUE	FALSE	42.9022	28	36	28	5.74388e+08	65.2
High	A0A140NBF4	Succinate--CoA ligase [ADP-forming] subunit beta OS=Escherichia coli (strain B / BL21-DE3) OX=469008 GN=sucC PE=3 SV=1	FALSE	TRUE	FALSE	69.8454	25	61	22	4.05429e+09	96.05
High	A0A140NCD7	Glucose-6-phosphate isomerase OS=Escherichia coli (strain B / BL21-DE3) OX=469008 GN=pgi PE=3 SV=1	FALSE	TRUE	FALSE	60.8379	22	37	22	1.57086e+09	67.06
High	A0A140N9V8	Pyruvate kinase OS=Escherichia coli (strain B / BL21-DE3) OX=469008 GN=pykF PE=3 SV=1	FALSE	TRUE	FALSE	53.8298	21	37	21	1.45348e+09	73.78
High	A0A140NA83	Enoyl-[acyl-carrier-protein] reductase [NADH] OS=Escherichia coli (strain B / BL21-DE3) OX=469008 GN=fabI PE=1 SV=1	FALSE	TRUE	FALSE	58.0153	17	39	17	4.0725e+09	71
High	A0A140N9N5	Phosphoenolpyruvate-protein phosphotransferase OS=Escherichia coli (strain B / BL21-DE3) OX=469008 GN=ptsI PE=3 SV=1	FALSE	TRUE	FALSE	51.1304	23	36	23	1.43292e+09	73.77
High	A0A140N6W8	30S ribosomal protein S7 OS=Escherichia coli (strain B / BL21-DE3) OX=469008 GN=rpsG PE=3 SV=1	FALSE	TRUE	FALSE	73.7179	15	61	15	7.89431e+09	114.27
High	A0A140SS67	Phosphoenolpyruvate carboxylase OS=Escherichia coli (strain B / BL21-DE3) OX=469008 GN=ppc PE=3 SV=1	FALSE	TRUE	FALSE	36.6931	24	34	24	5.62687e+08	53.41
High	A0A140N6M4	ADP-L-glycero-D-manno-heptose-6-epimerase OS=Escherichia coli (strain B / BL21-DE3) OX=469008 GN=hldD PE=3 SV=1	FALSE	TRUE	FALSE	51.9355	20	38	20	1.79657e+09	57.03
High	A0A140N8C6	Methionine--tRNA ligase OS=Escherichia coli (strain B / BL21-DE3) OX=469008 GN=metG PE=3 SV=1	FALSE	TRUE	FALSE	52.1418	26	41	26	3.79569e+08	65.05
High	A0A140NDV1	50S ribosomal protein L9 OS=Escherichia coli (strain B / BL21-DE3) OX=469008 GN=rplI PE=3 SV=1	FALSE	TRUE	FALSE	91.2752	18	80	17	6.30326e+09	102.85
High	A0A140NEY2	Maltoporin OS=Escherichia coli (strain B / BL21-DE3) OX=469008 GN=lamB PE=2 SV=1	FALSE	TRUE	FALSE	61.435	18	42	18	1.32399e+09	65.39
High	A0A140N7M5	Acetate kinase OS=Escherichia coli (strain B / BL21-DE3) OX=469008 GN=ackA PE=3 SV=1	FALSE	TRUE	FALSE	70.75	19	39	19	3.43679e+09	70.81
High	A0A140N9Q3	GMP synthase [glutamine-hydrolyzing] OS=Escherichia coli (strain B / BL21-DE3) OX=469008 GN=guaA PE=3 SV=1	FALSE	TRUE	FALSE	56.381	23	32	22	489445609	51.25
High	A0A140N6A8	Outer membrane channel protein TolC OS=Escherichia coli (strain B / BL21-DE3) OX=469008 GN=tolC PE=3 SV=1	FALSE	TRUE	FALSE	53.144	16	51	16	2.01284e+09	91.54
High	A0A140NFD7	Elongation factor Ts OS=Escherichia coli (strain B / BL21-DE3) OX=469008 GN=tsf PE=3 SV=1	FALSE	TRUE	FALSE	72.7915	21	51	21	3.21269e+09	94.17
High	A0A140NBN7	Tyrosine--tRNA ligase OS=Escherichia coli (strain B / BL21-DE3) OX=469008 GN=tyrS PE=3 SV=1	FALSE	TRUE	FALSE	58.7264	18	29	18	1.13511e+09	55.61
High	A0A140N9G9	Beta-ketoacyl synthase OS=Escherichia coli (strain B / BL21-DE3) OX=469008 GN=fabB PE=3 SV=1	FALSE	TRUE	FALSE	56.1576	13	33	13	1.91025e+09	72.61
High	A0A140N8Q9	Asparagine--tRNA ligase OS=Escherichia coli (strain B / BL21-DE3) OX=469008 GN=asnS PE=3 SV=1	FALSE	TRUE	FALSE	48.927	21	36	21	1.98062e+09	73.53
High	A0A140NA80	Succinate dehydrogenase flavoprotein subunit OS=Escherichia coli (strain B / BL21-DE3) OX=469008 GN=sdhA PE=3 SV=1	FALSE	TRUE	FALSE	40.9864	17	42	16	1.084e+09	77.18
High	A0A140NDT0	Aminopeptidase N OS=Escherichia coli (strain B / BL21-DE3) OX=469008 GN=pepN PE=3 SV=1	FALSE	TRUE	FALSE	37.0115	20	27	20	5.8293e+08	40.83
High	A0A140NI98	ATP synthase subunit b OS=Escherichia coli (strain B / BL21-DE3) OX=469008 GN=atpF PE=3 SV=1	FALSE	TRUE	FALSE	57.0513	15	42	15	9.13111e+08	89.14
High	A0A140N9G2	Succinate--CoA ligase [ADP-forming] subunit alpha OS=Escherichia coli (strain B / BL21-DE3) OX=469008 GN=sucD PE=3 SV=1	FALSE	TRUE	FALSE	56.0554	14	42	13	3.86103e+09	76.01
High	A0A140NC56	Purine nucleoside phosphorylase DeoD-type OS=Escherichia coli (strain B / BL21-DE3) OX=469008 GN=deoD PE=3 SV=1	FALSE	TRUE	FALSE	70.2929	16	43	16	2.51364e+09	61.57
High	A0A140NFM7	50S ribosomal protein L1 OS=Escherichia coli (strain B / BL21-DE3) OX=469008 GN=rplA PE=3 SV=1	FALSE	TRUE	FALSE	70.0855	19	54	19	6.30015e+09	107.82
High	A0A140N2S3	50S ribosomal protein L22 OS=Escherichia coli (strain B / BL21-DE3) OX=469008 GN=rplV PE=3 SV=1	FALSE	TRUE	FALSE	64.5455	13	53	13	4.12098e+09	77.11
High	A0A140N9Z7	NADH-quinone oxidoreductase subunit F OS=Escherichia coli (strain B / BL21-DE3) OX=469008 GN=nuoF PE=3 SV=1	FALSE	TRUE	FALSE	71.236	21	39	21	1.38776e+09	69.03
High	A0A140N548	30S ribosomal protein S4 OS=Escherichia coli (strain B / BL21-DE3) OX=469008 GN=rpsD PE=3 SV=1	FALSE	TRUE	FALSE	59.2233	15	58	13	5.243e+09	107.14
High	A0A140NAX3	FAD-dependent pyridine nucleotide-disulphide oxidoreductase OS=Escherichia coli (strain B / BL21-DE3) OX=469008 GN=ndh PE=4 SV=1	FALSE	TRUE	FALSE	69.3548	20	32	20	9.87201e+08	54.75
High	A0A140NF86	ATP-dependent protease ATPase subunit HslU OS=Escherichia coli (strain B / BL21-DE3) OX=469008 GN=hslU PE=2 SV=1	FALSE	TRUE	FALSE	55.9819	21	40	21	1.17455e+09	64.04
High	A0A140N932	CTP synthase OS=Escherichia coli (strain B / BL21-DE3) OX=469008 GN=pyrG PE=3 SV=1	FALSE	TRUE	FALSE	59.633	23	40	23	1.78592e+09	71.94
High	A0A140N8Q6	2-dehydro-3-deoxyphosphooctonate aldolase OS=Escherichia coli (strain B / BL21-DE3) OX=469008 GN=kdsA PE=3 SV=1	FALSE	TRUE	FALSE	62.6761	14	30	14	1.91828e+09	56.98
High	A0A140N9E5	Glutamate--tRNA ligase OS=Escherichia coli (strain B / BL21-DE3) OX=469008 GN=gltX PE=3 SV=1	FALSE	TRUE	FALSE	55.6263	19	35	19	7.1953e+08	52.51
High	A0A140NF41	ATP synthase gamma chain OS=Escherichia coli (strain B / BL21-DE3) OX=469008 GN=atpG PE=3 SV=1	FALSE	TRUE	FALSE	54.7038	18	31	18	7.97631e+08	56.48
High	A0A140N7E6	Threonine--tRNA ligase OS=Escherichia coli (strain B / BL21-DE3) OX=469008 GN=thrS PE=3 SV=1	FALSE	TRUE	FALSE	42.0561	19	30	17	5.2787e+08	38.79
High	A0A140SS63	50S ribosomal protein L7/L12 OS=Escherichia coli (strain B / BL21-DE3) OX=469008 GN=rplL PE=3 SV=1	FALSE	TRUE	FALSE	63.6364	13	75	13	2.43118e+09	144.7
High	A0A140NCG6	Cytochrome bd ubiquinol oxidase subunit I OS=Escherichia coli (strain B / BL21-DE3) OX=469008 GN=cydA PE=3 SV=1	FALSE	TRUE	FALSE	22.7969	15	34	15	1.6859e+09	58.97
High	A0A140N801	Glutathione synthetase OS=Escherichia coli (strain B / BL21-DE3) OX=469008 GN=gshB PE=3 SV=1	FALSE	TRUE	FALSE	50	15	27	15	5.24923e+08	41.46
High	A0A140N6N1	Glycerol-3-phosphate dehydrogenase OS=Escherichia coli (strain B / BL21-DE3) OX=469008 GN=ECBD_0316 PE=3 SV=1	FALSE	TRUE	FALSE	59.8802	20	32	20	8.55255e+08	44.68
High	A0A140N7D6	Transcription termination/antitermination protein NusA OS=Escherichia coli (strain B / BL21-DE3) OX=469008 GN=nusA PE=3 SV=1	FALSE	TRUE	FALSE	40.404	19	33	19	7.00423e+08	56.98
High	A0A140N598	50S ribosomal protein L13 OS=Escherichia coli (strain B / BL21-DE3) OX=469008 GN=rplM PE=3 SV=1	FALSE	TRUE	FALSE	81.6901	16	54	15	2.67094e+09	71.27
High	A0A140N9D5	Cysteine desulfurase IscS OS=Escherichia coli (strain B / BL21-DE3) OX=469008 GN=iscS PE=3 SV=1	FALSE	TRUE	FALSE	52.7228	18	32	18	1.09772e+09	53.83
High	A0A140N5J6	2-hydroxy-3-oxopropionate reductase OS=Escherichia coli (strain B / BL21-DE3) OX=469008 GN=garR PE=3 SV=1	FALSE	TRUE	FALSE	67.5676	12	24	12	3.32e+09	45.22
High	A0A140NBF2	EIIAB-Man OS=Escherichia coli (strain B / BL21-DE3) OX=469008 GN=manX PE=4 SV=1	FALSE	TRUE	FALSE	48.6068	15	30	15	1.3955e+09	27.46
High	A0A140N7B7	Inosine-5'-monophosphate dehydrogenase OS=Escherichia coli (strain B / BL21-DE3) OX=469008 GN=guaB PE=3 SV=1	FALSE	TRUE	FALSE	45.4918	16	27	16	7.4838e+08	53.39
High	A0A140N2T1	50S ribosomal protein L6 OS=Escherichia coli (strain B / BL21-DE3) OX=469008 GN=rplF PE=3 SV=1	FALSE	TRUE	FALSE	80.226	15	36	14	3.59877e+09	48.09
High	A0A140N6F1	Cytochrome-c3 hydrogenase OS=Escherichia coli (strain B / BL21-DE3) OX=469008 GN=hybC PE=3 SV=1	FALSE	TRUE	FALSE	51.4991	15	22	15	1.08291e+09	43.96
High	A0A140NDW9	2,3,4,5-tetrahydropyridine-2,6-dicarboxylate N-succinyltransferase OS=Escherichia coli (strain B / BL21-DE3) OX=469008 GN=dapD PE=3 SV=1	FALSE	TRUE	FALSE	64.9635	19	31	19	1.06857e+09	53.46
High	A0A140NDA6	Thioredoxin reductase OS=Escherichia coli (strain B / BL21-DE3) OX=469008 GN=trxB PE=3 SV=1	FALSE	TRUE	FALSE	58.2555	13	25	11	1.35681e+09	33.04
High	A0A140N3Q3	L-lactate dehydrogenase OS=Escherichia coli (strain B / BL21-DE3) OX=469008 GN=lldD PE=3 SV=1	FALSE	TRUE	FALSE	67.1717	22	38	22	1.76525e+09	67.74
High	A0A140NCD4	Universal stress protein UspG OS=Escherichia coli (strain B / BL21-DE3) OX=469008 GN=uspG PE=3 SV=1	FALSE	TRUE	FALSE	71.831	8	30	8	1.96577e+09	54.28
High	A0A140N7C3	Argininosuccinate synthase OS=Escherichia coli (strain B / BL21-DE3) OX=469008 GN=argG PE=3 SV=1	FALSE	TRUE	FALSE	51.9016	15	24	15	5.89359e+08	56.07
High	A0A140N5L3	ATP-dependent zinc metalloprotease FtsH OS=Escherichia coli (strain B / BL21-DE3) OX=469008 GN=ftsH PE=3 SV=1	FALSE	TRUE	FALSE	35.7032	19	29	19	5.79466e+08	56.43
High	A0A140N982	Bifunctional protein PutA OS=Escherichia coli (strain B / BL21-DE3) OX=469008 GN=putA PE=3 SV=1	FALSE	TRUE	FALSE	21.5909	19	22	19	3.15488e+08	37.28
High	A0A140NBF5	Serine--tRNA ligase OS=Escherichia coli (strain B / BL21-DE3) OX=469008 GN=serS PE=3 SV=1	FALSE	TRUE	FALSE	69.7674	19	32	19	1.04076e+09	51.49
High	A0A140NDE6	Acetyl-coenzyme A carboxylase carboxyl transferase subunit alpha OS=Escherichia coli (strain B / BL21-DE3) OX=469008 GN=accA PE=3 SV=1	FALSE	TRUE	FALSE	51.7241	15	25	15	1.10191e+09	42.93
High	A0A140NFB9	Formate dehydrogenase, alpha subunit OS=Escherichia coli (strain B / BL21-DE3) OX=469008 GN=fdnG PE=3 SV=1	FALSE	TRUE	FALSE	31.2008	19	26	19	3.30705e+08	50.05
High	A0A140N3D6	Catabolite activator protein OS=Escherichia coli (strain B / BL21-DE3) OX=469008 GN=crp PE=4 SV=1	FALSE	TRUE	FALSE	72.8571	17	30	17	7.34743e+08	46.1
High	A0A140NB56	Bifunctional glucose-1-phosphatase/inositol phosphatase OS=Escherichia coli (strain B / BL21-DE3) OX=469008 GN=agp PE=4 SV=1	FALSE	TRUE	FALSE	66.1017	17	33	17	2.38762e+09	57.02
High	A0A140N996	Aspartate--tRNA ligase OS=Escherichia coli (strain B / BL21-DE3) OX=469008 GN=aspS PE=3 SV=1	FALSE	TRUE	FALSE	45.9322	20	27	20	676771258	56.12
High	A0A140NE11	Nitroreductase OS=Escherichia coli (strain B / BL21-DE3) OX=469008 GN=nfsA PE=3 SV=1	FALSE	TRUE	FALSE	68.75	15	28	15	1.59339e+09	44.47
High	A0A140ND70	Efflux transporter, RND family, MFP subunit OS=Escherichia coli (strain B / BL21-DE3) OX=469008 GN=acrA PE=3 SV=1	FALSE	TRUE	FALSE	48.6146	12	26	12	1279184538	39.93
High	A0A140NCJ7	Argininosuccinate lyase OS=Escherichia coli (strain B / BL21-DE3) OX=469008 GN=argH PE=3 SV=1	FALSE	TRUE	FALSE	47.2648	13	22	13	8.67533e+08	41.02
High	A0A140NCK8	Aconitate hydratase OS=Escherichia coli (strain B / BL21-DE3) OX=469008 GN=acnA PE=3 SV=1	FALSE	TRUE	FALSE	30.0786	17	28	16	2.97651e+08	37.78
High	A0A140N802	Glycerophosphodiester phosphodiesterase OS=Escherichia coli (strain B / BL21-DE3) OX=469008 GN=glpQ PE=4 SV=1	FALSE	TRUE	FALSE	57.5419	14	26	14	9.3603e+08	49.59
High	A0A140NI72	Ketol-acid reductoisomerase (NADP(+)) OS=Escherichia coli (strain B / BL21-DE3) OX=469008 GN=ilvC PE=3 SV=1	FALSE	TRUE	FALSE	49.8982	21	27	21	1.07006e+09	37.01
High	A0A140NGD0	Alpha,alpha-phosphotrehalase OS=Escherichia coli (strain B / BL21-DE3) OX=469008 GN=treC PE=3 SV=1	FALSE	TRUE	FALSE	44.1016	18	31	18	7.99249e+08	57.46
High	A0A140NDB6	50S ribosomal protein L10 OS=Escherichia coli (strain B / BL21-DE3) OX=469008 GN=rplJ PE=3 SV=1	FALSE	TRUE	FALSE	71.5152	14	39	14	7.35994e+09	76.74
High	A0A140NEQ0	ATP-dependent Clp protease ATP-binding subunit ClpX OS=Escherichia coli (strain B / BL21-DE3) OX=469008 GN=clpX PE=3 SV=1	FALSE	TRUE	FALSE	52.1226	20	29	14	4.08484e+08	48.69
High	A0A140NCH9	DNA-binding protein OS=Escherichia coli (strain B / BL21-DE3) OX=469008 GN=hns PE=3 SV=1	FALSE	TRUE	FALSE	81.0219	19	60	19	3.5355e+09	142.81
High	A0A140N5B4	30S ribosomal protein S13 OS=Escherichia coli (strain B / BL21-DE3) OX=469008 GN=rpsM PE=3 SV=1	FALSE	TRUE	FALSE	69.4915	14	51	12	3.34328e+09	65.32
High	A0A140NAA1	Ribonuclease E OS=Escherichia coli (strain B / BL21-DE3) OX=469008 GN=rne PE=3 SV=1	FALSE	TRUE	FALSE	25.5419	15	22	15	1.42582e+08	47.65
High	A0A140NCS9	Ribose-phosphate pyrophosphokinase OS=Escherichia coli (strain B / BL21-DE3) OX=469008 GN=prs PE=3 SV=1	FALSE	TRUE	FALSE	48.368	14	31	13	2.38876e+09	51.64
High	A0A140NFD2	Lipoprotein OS=Escherichia coli (strain B / BL21-DE3) OX=469008 GN=metQ PE=3 SV=1	FALSE	TRUE	FALSE	53.5055	11	30	11	1.7526e+09	62.92
High	A0A140NGG3	Two component transcriptional regulator, winged helix family OS=Escherichia coli (strain B / BL21-DE3) OX=469008 GN=arcA PE=4 SV=1	FALSE	TRUE	FALSE	55.042	12	22	12	1475179237	40.21
High	A0A140NFT4	Carbamoyl-phosphate synthase small chain OS=Escherichia coli (strain B / BL21-DE3) OX=469008 GN=carA PE=3 SV=1	FALSE	TRUE	FALSE	55.2356	14	24	14	9.22213e+08	53.13
High	A0A140NED8	Metalloprotease PmbA OS=Escherichia coli (strain B / BL21-DE3) OX=469008 GN=pmbA PE=3 SV=1	FALSE	TRUE	FALSE	43.1111	17	21	17	4.35086e+08	41.69
High	A0A140N4S7	Glutathione S-transferase domain protein OS=Escherichia coli (strain B / BL21-DE3) OX=469008 GN=sspA PE=3 SV=1	FALSE	TRUE	FALSE	66.0377	14	22	14	1.96175e+09	44.98
High	A0A140NBB3	Pyruvate kinase OS=Escherichia coli (strain B / BL21-DE3) OX=469008 GN=pyk PE=3 SV=1	FALSE	TRUE	FALSE	38.9583	15	26	15	1.20884e+09	52.59
High	A0A140NC67	Alpha-D-glucose phosphate-specific phosphoglucomutase OS=Escherichia coli (strain B / BL21-DE3) OX=469008 GN=pgm PE=3 SV=1	FALSE	TRUE	FALSE	49.0842	16	22	16	5.39795e+08	36.48
High	A0A140SSB0	Uridine phosphorylase OS=Escherichia coli (strain B / BL21-DE3) OX=469008 GN=udp PE=3 SV=1	FALSE	TRUE	FALSE	61.811	10	31	10	1.24842e+09	67.06
High	A0A140NEK4	Modulator of FtsH protease HflC OS=Escherichia coli (strain B / BL21-DE3) OX=469008 GN=hflC PE=3 SV=1	FALSE	TRUE	FALSE	61.976	18	26	18	6.08154e+08	32.08
High	A0A140N8N4	Phenylalanine--tRNA ligase beta subunit OS=Escherichia coli (strain B / BL21-DE3) OX=469008 GN=pheT PE=3 SV=1	FALSE	TRUE	FALSE	28.1761	14	19	14	3.87505e+08	33
High	A0A140N6F6	Oligopeptidase A OS=Escherichia coli (strain B / BL21-DE3) OX=469008 GN=prlC PE=3 SV=1	FALSE	TRUE	FALSE	38.6765	22	33	22	3.81435e+08	53.1
High	A0A140N508	Bacterioferritin OS=Escherichia coli (strain B / BL21-DE3) OX=469008 GN=bfr PE=3 SV=1	FALSE	TRUE	FALSE	66.4557	11	28	10	2.60029e+09	54.22
High	A0A140NDZ9	Succinate dehydrogenase iron-sulfur subunit OS=Escherichia coli (strain B / BL21-DE3) OX=469008 GN=sdhB PE=3 SV=1	FALSE	TRUE	FALSE	69.3277	16	35	15	3.15117e+09	67.48
High	A0A140NAB8	Glutaredoxin 2 OS=Escherichia coli (strain B / BL21-DE3) OX=469008 GN=grxB PE=4 SV=1	FALSE	TRUE	FALSE	66.9767	14	25	14	9.50527e+08	46.67
High	A0A140NAR5	Ribosome-binding ATPase YchF OS=Escherichia coli (strain B / BL21-DE3) OX=469008 GN=ychF PE=3 SV=1	FALSE	TRUE	FALSE	60.0551	15	24	15	9.39074e+08	39.96
High	A0A140NBG7	Fumarate hydratase class II OS=Escherichia coli (strain B / BL21-DE3) OX=469008 GN=fumC PE=3 SV=1	FALSE	TRUE	FALSE	40.4711	14	20	14	5.06563e+08	37.02
High	A0A140NEL5	Triosephosphate isomerase OS=Escherichia coli (strain B / BL21-DE3) OX=469008 GN=tpiA PE=3 SV=1	FALSE	TRUE	FALSE	65.098	15	32	15	1.262e+09	55.47
High	A0A140NBF0	Superoxide dismutase OS=Escherichia coli (strain B / BL21-DE3) OX=469008 GN=sodB PE=3 SV=1	FALSE	TRUE	FALSE	85.4922	10	79	10	7.89419e+09	187.23
High	A0A140N846	50S ribosomal protein L25 OS=Escherichia coli (strain B / BL21-DE3) OX=469008 GN=rplY PE=3 SV=1	FALSE	TRUE	FALSE	77.6596	11	37	11	2.12562e+09	43.49
High	A0A140N991	Transaldolase OS=Escherichia coli (strain B / BL21-DE3) OX=469008 GN=tal PE=3 SV=1	FALSE	TRUE	FALSE	50.9494	12	26	10	4.00076e+08	50.5
High	A0A140N5K8	50S ribosomal protein L4 OS=Escherichia coli (strain B / BL21-DE3) OX=469008 GN=rplD PE=3 SV=1	FALSE	TRUE	FALSE	70.1493	14	48	14	2129027648	87.89
High	A0A140NB75	Delta-aminolevulinic acid dehydratase OS=Escherichia coli (strain B / BL21-DE3) OX=469008 GN=hemB PE=3 SV=1	FALSE	TRUE	FALSE	53.7037	14	26	14	1.05964e+09	61.41
High	A0A140N1Y4	L-threonine 3-dehydrogenase OS=Escherichia coli (strain B / BL21-DE3) OX=469008 GN=tdh PE=3 SV=1	FALSE	TRUE	FALSE	56.305	15	28	15	2.77708e+09	44.3
High	A0A140N3T1	Peptidase M24 OS=Escherichia coli (strain B / BL21-DE3) OX=469008 GN=pepP PE=4 SV=1	FALSE	TRUE	FALSE	56.0091	15	27	15	9.92249e+08	44.34
High	A0A140NBN8	Serine-type D-Ala-D-Ala carboxypeptidase OS=Escherichia coli (strain B / BL21-DE3) OX=469008 GN=dacA PE=3 SV=1	FALSE	TRUE	FALSE	54.0943	16	25	14	9.14956e+08	35.01
High	A0A140NHM8	Soluble pyridine nucleotide transhydrogenase OS=Escherichia coli (strain B / BL21-DE3) OX=469008 GN=sthA PE=3 SV=1	FALSE	TRUE	FALSE	41.8455	10	19	10	8.50509e+08	42.56
High	A0A140NBM7	Leucine--tRNA ligase OS=Escherichia coli (strain B / BL21-DE3) OX=469008 GN=leuS PE=3 SV=1	FALSE	TRUE	FALSE	29.5349	19	23	19	5.29294e+08	37.37
High	A0A140NAV6	Periplasmic serine endoprotease DegP-like OS=Escherichia coli (strain B / BL21-DE3) OX=469008 GN=degP PE=3 SV=1	FALSE	TRUE	FALSE	38.1857	13	21	13	1.18772e+09	38.33
High	A0A140N627	S-adenosylmethionine synthase OS=Escherichia coli (strain B / BL21-DE3) OX=469008 GN=metK PE=3 SV=1	FALSE	TRUE	FALSE	50	17	25	16	9.08708e+08	47.97
High	A0A140N7J9	Biotin carboxylase OS=Escherichia coli (strain B / BL21-DE3) OX=469008 GN=accC PE=4 SV=1	FALSE	TRUE	FALSE	39.8664	15	25	15	7.83797e+08	31.66
High	A0A140NF24	DNA-binding protein HU-alpha OS=Escherichia coli (strain B / BL21-DE3) OX=469008 GN=hupA PE=3 SV=1	FALSE	TRUE	FALSE	82.2222	12	24	12	7.88282e+09	33.37
High	A0A140N9F7	YdgA family protein OS=Escherichia coli (strain B / BL21-DE3) OX=469008 GN=ECBD_2032 PE=4 SV=1	FALSE	TRUE	FALSE	50.996	16	22	16	5.37555e+08	43.89
High	A0A140N3T4	Translation initiation factor IF-2 OS=Escherichia coli (strain B / BL21-DE3) OX=469008 GN=infB PE=3 SV=1	FALSE	TRUE	FALSE	26.6292	15	19	15	2.04243e+08	35.32
High	A0A140N5H6	Biosynthetic arginine decarboxylase OS=Escherichia coli (strain B / BL21-DE3) OX=469008 GN=speA PE=3 SV=1	FALSE	TRUE	FALSE	28.5714	13	19	13	403625141	36.24
High	A0A140N8V2	Cell division inhibitor MinD OS=Escherichia coli (strain B / BL21-DE3) OX=469008 GN=minD PE=3 SV=1	FALSE	TRUE	FALSE	48.5185	14	21	14	6.88815e+08	41.66
High	A0A140N8Q5	PTS galactitol transporter subunit IIA OS=Escherichia coli (strain B / BL21-DE3) OX=469008 GN=gatA PE=4 SV=1	FALSE	TRUE	FALSE	64	7	23	7	2.49393e+09	39.44
High	A0A140NFR6	Chaperone SurA OS=Escherichia coli (strain B / BL21-DE3) OX=469008 GN=surA PE=3 SV=1	FALSE	TRUE	FALSE	40.6542	13	19	13	3.9447e+08	34.34
High	A0A140NBZ3	Protein HflK OS=Escherichia coli (strain B / BL21-DE3) OX=469008 GN=hflK PE=3 SV=1	FALSE	TRUE	FALSE	51.5513	16	29	16	9.35902e+08	55.17
High	A0A140NC71	DNA-binding protein YbiB OS=Escherichia coli (strain B / BL21-DE3) OX=469008 GN=ybiB PE=4 SV=1	FALSE	TRUE	FALSE	73.125	15	20	15	1.00855e+09	35.98
High	A0A140NB21	Putative glucose-6-phosphate 1-epimerase OS=Escherichia coli (strain B / BL21-DE3) OX=469008 GN=ECBD_1864 PE=3 SV=1	FALSE	TRUE	FALSE	60.5442	12	19	12	9.04732e+08	31.95
High	A0A140N9R4	Translation initiation factor IF-3 OS=Escherichia coli (strain B / BL21-DE3) OX=469008 GN=infC PE=3 SV=1	FALSE	TRUE	FALSE	55.5556	9	25	9	2.09967e+09	45.2
High	A0A140NCU5	6,7-dimethyl-8-ribityllumazine synthase OS=Escherichia coli (strain B / BL21-DE3) OX=469008 GN=ribH PE=3 SV=1	FALSE	TRUE	FALSE	94.8718	9	22	9	2.74334e+09	47.71
High	A0A140NHC7	GTP-binding protein TypA OS=Escherichia coli (strain B / BL21-DE3) OX=469008 GN=typA PE=4 SV=1	FALSE	TRUE	FALSE	26.6886	13	24	13	6.91906e+08	37.65
High	A0A140NGG7	30S ribosomal protein S6 OS=Escherichia coli (strain B / BL21-DE3) OX=469008 GN=rpsF PE=3 SV=1	FALSE	TRUE	FALSE	67.9389	9	27	9	1.67672e+09	52.18
High	A0A140N983	Arginine--tRNA ligase OS=Escherichia coli (strain B / BL21-DE3) OX=469008 GN=argS PE=3 SV=1	FALSE	TRUE	FALSE	36.7418	17	20	17	2.45587e+08	37.53
High	A0A140NEW8	ATP-dependent Clp protease proteolytic subunit OS=Escherichia coli (strain B / BL21-DE3) OX=469008 GN=clpP PE=3 SV=1	FALSE	TRUE	FALSE	29.4686	4	13	4	1.9911e+09	33.82
High	A0A140N201	EIICBA-Mtl OS=Escherichia coli (strain B / BL21-DE3) OX=469008 GN=mtlA PE=4 SV=1	FALSE	TRUE	FALSE	26.6876	14	19	14	5.45178e+08	36.96
High	A0A140NG05	UPF0325 protein YaeH OS=Escherichia coli (strain B / BL21-DE3) OX=469008 GN=yaeH PE=3 SV=1	FALSE	TRUE	FALSE	64.8438	12	19	12	1.28256e+09	30.71
High	A0A140NB59	Phosphofructokinase OS=Escherichia coli (strain B / BL21-DE3) OX=469008 GN=pfkB PE=3 SV=1	FALSE	TRUE	FALSE	73.4628	14	29	14	6.35988e+08	55.48
High	A0A140N8R5	AMP nucleosidase OS=Escherichia coli (strain B / BL21-DE3) OX=469008 GN=ppnN PE=4 SV=1	FALSE	TRUE	FALSE	38.5463	12	17	12	3.62599e+08	35.58
High	A0A140NEF6	Inorganic pyrophosphatase OS=Escherichia coli (strain B / BL21-DE3) OX=469008 GN=ppa PE=3 SV=1	FALSE	TRUE	FALSE	48.8636	9	27	9	1.37001e+09	48.07
High	A0A140NCG0	Thiol peroxidase OS=Escherichia coli (strain B / BL21-DE3) OX=469008 GN=tpx PE=3 SV=1	FALSE	TRUE	FALSE	43.4524	7	26	7	2.13582e+09	65.64
High	A0A140N6J6	Histidine--tRNA ligase OS=Escherichia coli (strain B / BL21-DE3) OX=469008 GN=hisS PE=3 SV=1	FALSE	TRUE	FALSE	48.8208	16	26	16	6.12776e+08	44.17
High	A0A140N4Y8	Protein RecA OS=Escherichia coli (strain B / BL21-DE3) OX=469008 GN=recA PE=3 SV=1	FALSE	TRUE	FALSE	40.2266	11	23	9	4.83238e+08	46.14
High	A0A140NF15	Isocitrase OS=Escherichia coli (strain B / BL21-DE3) OX=469008 GN=aceA PE=4 SV=1	FALSE	TRUE	FALSE	50	15	17	15	1.17052e+09	37.54
High	A0A140N8E6	PTS galactitol transporter subunit IIB OS=Escherichia coli (strain B / BL21-DE3) OX=469008 GN=gatB PE=4 SV=1	FALSE	TRUE	FALSE	86.1702	7	26	7	4.26384e+09	54.66
High	A0A140N6F8	Outer membrane lipoprotein Slp OS=Escherichia coli (strain B / BL21-DE3) OX=469008 GN=slp PE=4 SV=1	FALSE	TRUE	FALSE	48.9362	5	23	5	3.96468e+09	45.38
High	A0A140N7E4	Thioredoxin peroxidase OS=Escherichia coli (strain B / BL21-DE3) OX=469008 GN=bcp PE=4 SV=1	FALSE	TRUE	FALSE	66.0256	10	23	10	1.34923e+09	39.07
High	A0A140N7C1	Tryptophan--tRNA ligase OS=Escherichia coli (strain B / BL21-DE3) OX=469008 GN=trpS PE=3 SV=1	FALSE	TRUE	FALSE	49.4012	10	19	10	1.15167e+09	39.81
High	A0A140NDH1	Glutamate-1-semialdehyde 2,1-aminomutase OS=Escherichia coli (strain B / BL21-DE3) OX=469008 GN=hemL PE=3 SV=1	FALSE	TRUE	FALSE	40.1408	11	24	11	1.80179e+09	46.91
High	A0A140NDI4	Phosphoserine aminotransferase OS=Escherichia coli (strain B / BL21-DE3) OX=469008 GN=serC PE=3 SV=1	FALSE	TRUE	FALSE	44.1989	14	19	14	4.36626e+08	41.22
High	A0A140NCV3	Peptidylprolyl isomerase OS=Escherichia coli (strain B / BL21-DE3) OX=469008 GN=ppiD PE=4 SV=1	FALSE	TRUE	FALSE	41.7335	16	19	16	5.09291e+08	36.8
High	A0A140N6A0	OmpA family lipoprotein OS=Escherichia coli (strain B / BL21-DE3) OX=469008 GN=ECBD_0185 PE=4 SV=1	FALSE	TRUE	FALSE	56.1644	8	16	8	7.2962e+08	36.3
High	A0A140SSA2	Glutamine synthetase OS=Escherichia coli (strain B / BL21-DE3) OX=469008 GN=glnA PE=3 SV=1	FALSE	TRUE	FALSE	35.6077	12	20	12	1.38318e+09	38.04
High	A0A140N587	Bifunctional polymyxin resistance protein ArnA OS=Escherichia coli (strain B / BL21-DE3) OX=469008 GN=arnA PE=3 SV=1	FALSE	TRUE	FALSE	28.9394	12	22	12	7.61973e+08	30.96
High	A0A140NDZ1	Thiamine pyrophosphate protein TPP binding domain protein OS=Escherichia coli (strain B / BL21-DE3) OX=469008 GN=poxB PE=3 SV=1	FALSE	TRUE	FALSE	45.2797	15	20	15	7.72938e+08	32.81
High	A0A140N6Y5	30S ribosomal protein S10 OS=Escherichia coli (strain B / BL21-DE3) OX=469008 GN=rpsJ PE=3 SV=1	FALSE	TRUE	FALSE	61.165	12	36	4	6.17317e+09	52.52
High	A0A140SSC5	ATP synthase epsilon chain OS=Escherichia coli (strain B / BL21-DE3) OX=469008 GN=atpC PE=3 SV=1	FALSE	TRUE	FALSE	38.8489	4	14	4	5.78923e+08	33.39
High	A0A140NAF9	Lipoyl synthase OS=Escherichia coli (strain B / BL21-DE3) OX=469008 GN=lipA PE=3 SV=1	FALSE	TRUE	FALSE	58.8785	14	20	13	9.16816e+08	30.94
High	A0A140SS95	5-methyltetrahydropteroyltriglutamate--homocysteine methyltransferase OS=Escherichia coli (strain B / BL21-DE3) OX=469008 GN=metE PE=3 SV=1	FALSE	TRUE	FALSE	29.2165	14	16	14	2.74448e+08	32.26
High	A0A140NDL3	Outer membrane protein X OS=Escherichia coli (strain B / BL21-DE3) OX=469008 GN=ompX PE=3 SV=1	FALSE	TRUE	FALSE	49.7076	9	47	9	4.01841e+09	95.56
High	A0A140NBF1	Glucans biosynthesis protein G OS=Escherichia coli (strain B / BL21-DE3) OX=469008 GN=mdoG PE=3 SV=1	FALSE	TRUE	FALSE	34.2466	12	16	11	282398682	35.79
High	A0A140N993	NAD(P)H dehydrogenase (quinone) OS=Escherichia coli (strain B / BL21-DE3) OX=469008 GN=wrbA PE=3 SV=1	FALSE	TRUE	FALSE	59.0909	11	34	11	8.70443e+08	71.86
High	A0A140N5L7	50S ribosomal protein L24 OS=Escherichia coli (strain B / BL21-DE3) OX=469008 GN=rplX PE=3 SV=1	FALSE	TRUE	FALSE	81.7308	13	41	13	4.70146e+09	67.64
High	A0A140N730	Ribosome-associated translation inhibitor RaiA OS=Escherichia coli (strain B / BL21-DE3) OX=469008 GN=raiA PE=4 SV=1	FALSE	TRUE	FALSE	71.6814	8	22	8	1.30894e+09	41.39
High	A0A140N626	DNA gyrase subunit A OS=Escherichia coli (strain B / BL21-DE3) OX=469008 GN=gyrA PE=3 SV=1	FALSE	TRUE	FALSE	20.5714	15	20	15	2.28911e+08	26.93
High	A0A140N4S8	Outer membrane protein assembly factor BamC OS=Escherichia coli (strain B / BL21-DE3) OX=469008 GN=bamC PE=3 SV=1	FALSE	TRUE	FALSE	63.0814	13	20	13	1.06847e+09	37.55
High	A0A140NAZ2	50S ribosomal protein L32 OS=Escherichia coli (strain B / BL21-DE3) OX=469008 GN=rpmF PE=3 SV=1	FALSE	TRUE	FALSE	59.6491	6	23	6	1.26679e+09	44.28
High	A0A140NFN5	UDP-N-acetylmuramoyl-L-alanyl-D-glutamate--2,6-diaminopimelate ligase OS=Escherichia coli (strain B / BL21-DE3) OX=469008 GN=murE PE=3 SV=1	FALSE	TRUE	FALSE	39.596	14	20	14	3.41968e+08	30.69
High	A0A140NC19	Radiation resistance protein YbgI OS=Escherichia coli (strain B / BL21-DE3) OX=469008 GN=ybgI PE=3 SV=1	FALSE	TRUE	FALSE	48.1781	8	19	8	5.24223e+08	31.67
High	A0A140NC74	Universal stress protein UspE OS=Escherichia coli (strain B / BL21-DE3) OX=469008 GN=uspE PE=4 SV=1	FALSE	TRUE	FALSE	41.4557	10	15	10	8.55006e+08	30.89
High	A0A140N885	NADH-quinone oxidoreductase subunit I OS=Escherichia coli (strain B / BL21-DE3) OX=469008 GN=nuoI PE=3 SV=1	FALSE	TRUE	FALSE	59.4444	8	19	8	4.4757e+08	32.7
High	A0A140N7N1	Glutathione S-transferase domain protein OS=Escherichia coli (strain B / BL21-DE3) OX=469008 GN=gstA PE=3 SV=1	FALSE	TRUE	FALSE	71.6418	12	17	12	5.61215e+08	26.91
High	A0A140N7K3	Acetyl-coenzyme A carboxylase carboxyl transferase subunit beta OS=Escherichia coli (strain B / BL21-DE3) OX=469008 GN=accD PE=3 SV=1	FALSE	TRUE	FALSE	37.5	11	22	11	8.61696e+08	31.36
High	A0A140N5F4	Polyribonucleotide nucleotidyltransferase OS=Escherichia coli (strain B / BL21-DE3) OX=469008 GN=pnp PE=3 SV=1	FALSE	TRUE	FALSE	34.3179	16	20	16	7.25591e+08	32.92
High	A0A140N6M2	Fructosamine kinase OS=Escherichia coli (strain B / BL21-DE3) OX=469008 GN=ECBD_1920 PE=3 SV=1	FALSE	TRUE	FALSE	61.5385	12	20	12	1.4334e+09	32.24
High	A0A140NDC1	UPF0227 protein YcfP OS=Escherichia coli (strain B / BL21-DE3) OX=469008 GN=ycfP PE=3 SV=1	FALSE	TRUE	FALSE	70.5556	11	21	11	7.22558e+08	43.49
High	A0A140N583	Bifunctional protein HldE OS=Escherichia coli (strain B / BL21-DE3) OX=469008 GN=hldE PE=3 SV=1	FALSE	TRUE	FALSE	42.5577	14	18	14	6.87326e+08	24.88
High	A0A140N8N0	S-ribosylhomocysteine lyase OS=Escherichia coli (strain B / BL21-DE3) OX=469008 GN=luxS PE=3 SV=1	FALSE	TRUE	FALSE	70.1754	8	19	8	5.84895e+08	34.69
High	A0A140N913	3-oxoacyl-[acyl-carrier-protein] synthase 3 OS=Escherichia coli (strain B / BL21-DE3) OX=469008 GN=fabH PE=3 SV=1	FALSE	TRUE	FALSE	39.1167	8	13	8	1.00147e+09	31.62
High	A0A140N3G7	50S ribosomal protein L3 OS=Escherichia coli (strain B / BL21-DE3) OX=469008 GN=rplC PE=3 SV=1	FALSE	TRUE	FALSE	64.1148	14	25	12	6.45201e+09	37.09
High	A0A140ND98	Isoleucine--tRNA ligase OS=Escherichia coli (strain B / BL21-DE3) OX=469008 GN=ileS PE=3 SV=1	FALSE	TRUE	FALSE	25.9062	17	21	17	3.95569e+08	30.63
High	A0A140N6N0	Phenylalanine--tRNA ligase alpha subunit OS=Escherichia coli (strain B / BL21-DE3) OX=469008 GN=pheS PE=3 SV=1	FALSE	TRUE	FALSE	41.5902	11	22	11	6.17632e+08	35.17
High	A0A140SSA5	ATP-dependent RNA helicase RhlB OS=Escherichia coli (strain B / BL21-DE3) OX=469008 GN=rhlB PE=3 SV=1	FALSE	TRUE	FALSE	36.342	9	16	9	3.77766e+08	33.21
High	A0A140N5L9	Cysteine synthase OS=Escherichia coli (strain B / BL21-DE3) OX=469008 GN=cysK PE=3 SV=1	FALSE	TRUE	FALSE	64.7059	14	20	14	1.11745e+09	31.83
High	A0A140N935	Peptidoglycan-binding LysM OS=Escherichia coli (strain B / BL21-DE3) OX=469008 GN=kbp PE=4 SV=1	FALSE	TRUE	FALSE	59.7315	8	17	8	1.29298e+09	23.92
High	A0A140N5V9	Aldo/keto reductase OS=Escherichia coli (strain B / BL21-DE3) OX=469008 GN=gpr PE=4 SV=1	FALSE	TRUE	FALSE	60.4046	15	20	15	7.96219e+08	37.25
High	A0A140N6T7	50S ribosomal protein L19 OS=Escherichia coli (strain B / BL21-DE3) OX=469008 GN=rplS PE=3 SV=1	FALSE	TRUE	FALSE	67.8261	9	44	9	6.40181e+08	88.81
High	A0A140NC11	Peptidoglycan-associated protein OS=Escherichia coli (strain B / BL21-DE3) OX=469008 GN=pal PE=3 SV=1	FALSE	TRUE	FALSE	54.3353	7	27	7	3.06276e+09	56.49
High	A0A140NAN1	Quinone-dependent D-lactate dehydrogenase OS=Escherichia coli (strain B / BL21-DE3) OX=469008 GN=dld PE=3 SV=1	FALSE	TRUE	FALSE	39.4046	16	26	16	2.92747e+08	25.09
High	A0A140N8Y2	Thymidylate synthase OS=Escherichia coli (strain B / BL21-DE3) OX=469008 GN=thyA PE=3 SV=1	FALSE	TRUE	FALSE	43.5606	11	17	11	3.22139e+08	31
High	A0A140N4P3	4-hydroxy-3-methylbut-2-en-1-yl diphosphate synthase (flavodoxin) OS=Escherichia coli (strain B / BL21-DE3) OX=469008 GN=ispG PE=3 SV=1	FALSE	TRUE	FALSE	55.3763	15	20	15	5.84089e+08	40.17
High	A0A140NF95	Phosphoethanolamine transferase EptA OS=Escherichia coli (strain B / BL21-DE3) OX=469008 GN=eptA PE=4 SV=1	FALSE	TRUE	FALSE	23.9488	10	14	10	2.20406e+08	28.84
High	A0A140NEV5	Alkyl hydroperoxide reductase subunit F OS=Escherichia coli (strain B / BL21-DE3) OX=469008 GN=ECBD_3046 PE=3 SV=1	FALSE	TRUE	FALSE	39.3597	13	16	13	3.01215e+08	24.96
High	A0A140NGE1	Fructose-1,6-bisphosphatase class 1 OS=Escherichia coli (strain B / BL21-DE3) OX=469008 GN=fbp PE=3 SV=1	FALSE	TRUE	FALSE	51.506	15	20	15	3.69351e+08	21.97
High	A0A140N5T6	Erythronate-4-phosphate dehydrogenase OS=Escherichia coli (strain B / BL21-DE3) OX=469008 GN=pdxB PE=3 SV=1	FALSE	TRUE	FALSE	46.5608	14	20	14	4.29913e+08	21.09
High	A0A140N312	Universal stress protein OS=Escherichia coli (strain B / BL21-DE3) OX=469008 GN=uspA PE=3 SV=1	FALSE	TRUE	FALSE	70.1389	7	29	7	9.97252e+08	45.31
High	A0A140N9H5	tRNA/rRNA methyltransferase OS=Escherichia coli (strain B / BL21-DE3) OX=469008 GN=ECBD_1099 PE=4 SV=1	FALSE	TRUE	FALSE	51.8841	11	18	11	4.69964e+08	37.09
High	A0A140NDZ2	Thymidine phosphorylase OS=Escherichia coli (strain B / BL21-DE3) OX=469008 GN=deoA PE=3 SV=1	FALSE	TRUE	FALSE	37.9545	14	20	14	2.80368e+08	25.48
High	A0A140NCC1	Glycerol-3-phosphate acyltransferase OS=Escherichia coli (strain B / BL21-DE3) OX=469008 GN=plsB PE=3 SV=1	FALSE	TRUE	FALSE	25.1549	14	16	14	1.826e+08	22.11
High	A0A140N4Y5	Aspartate-semialdehyde dehydrogenase OS=Escherichia coli (strain B / BL21-DE3) OX=469008 GN=asd PE=3 SV=1	FALSE	TRUE	FALSE	41.6894	9	15	9	7.22803e+08	30.32
High	A0A140N9N7	UDP-4-amino-4-deoxy-L-arabinose--oxoglutarate aminotransferase OS=Escherichia coli (strain B / BL21-DE3) OX=469008 GN=arnB PE=3 SV=1	FALSE	TRUE	FALSE	36.4116	10	17	10	8.21591e+08	28.26
High	A0A140N989	ATP-dependent RNA helicase SrmB OS=Escherichia coli (strain B / BL21-DE3) OX=469008 GN=srmB PE=3 SV=1	FALSE	TRUE	FALSE	32.8829	12	18	12	4.77602e+08	31.72
High	A0A140N3U1	tRNA-modifying protein YgfZ OS=Escherichia coli (strain B / BL21-DE3) OX=469008 GN=ygfZ PE=3 SV=1	FALSE	TRUE	FALSE	42.638	12	16	12	1.00809e+09	30.58
High	A0A140SS75	ATP-dependent 6-phosphofructokinase OS=Escherichia coli (strain B / BL21-DE3) OX=469008 GN=pfkA PE=3 SV=1	FALSE	TRUE	FALSE	47.1875	13	19	13	1.02459e+09	39.12
High	A0A140N5E8	Phosphoglucosamine mutase OS=Escherichia coli (strain B / BL21-DE3) OX=469008 GN=glmM PE=3 SV=1	FALSE	TRUE	FALSE	24.9438	8	15	8	3.71816e+08	28.5
High	A0A140N8V0	dTDP-glucose 4,6-dehydratase OS=Escherichia coli (strain B / BL21-DE3) OX=469008 GN=rfbB PE=3 SV=1	FALSE	TRUE	FALSE	41.5512	13	19	12	2.0198e+08	28.81
High	A0A140N536	Signal recognition particle protein OS=Escherichia coli (strain B / BL21-DE3) OX=469008 GN=ffh PE=3 SV=1	FALSE	TRUE	FALSE	46.1369	13	17	13	5.4135e+08	30.87
High	A0A140NDZ7	RNA polymerase-binding transcription factor DksA OS=Escherichia coli (strain B / BL21-DE3) OX=469008 GN=dksA PE=3 SV=1	FALSE	TRUE	FALSE	58.2781	7	15	7	8.43236e+08	20.22
High	A0A140N8G3	Aminomethyltransferase OS=Escherichia coli (strain B / BL21-DE3) OX=469008 GN=gcvT PE=3 SV=1	FALSE	TRUE	FALSE	40.9341	10	20	10	9.60603e+08	27.17
High	A0A140N5I2	Malate dehydrogenase (Oxaloacetate-decarboxylating) (NADP(+)), Phosphate acetyltransferase OS=Escherichia coli (strain B / BL21-DE3) OX=469008 GN=maeB PE=3 SV=1	FALSE	TRUE	FALSE	27.2727	11	16	11	2.42592e+08	24.68
High	A0A140N4N0	Orotate phosphoribosyltransferase OS=Escherichia coli (strain B / BL21-DE3) OX=469008 GN=pyrE PE=3 SV=1	FALSE	TRUE	FALSE	65.7277	13	17	13	5.14923e+08	26.77
High	A0A140NCZ5	Sec translocon accessory complex subunit YajC OS=Escherichia coli (strain B / BL21-DE3) OX=469008 GN=yajC PE=3 SV=1	FALSE	TRUE	FALSE	46.3636	5	28	5	1.29798e+09	68.55
High	A0A140NAW9	Adenylate kinase OS=Escherichia coli (strain B / BL21-DE3) OX=469008 GN=adk PE=3 SV=1	FALSE	TRUE	FALSE	60.2804	11	22	11	5.97884e+08	40.55
High	A0A140NBR3	Carbonic anhydrase OS=Escherichia coli (strain B / BL21-DE3) OX=469008 GN=can PE=1 SV=1	FALSE	TRUE	FALSE	58.6364	9	17	9	5.7015e+08	30.87
High	A0A140N7D8	30S ribosomal protein S16 OS=Escherichia coli (strain B / BL21-DE3) OX=469008 GN=rpsP PE=3 SV=1	FALSE	TRUE	FALSE	58.5366	7	20	7	6.57728e+09	24.89
High	A0A140NFF3	Phosphoheptose isomerase OS=Escherichia coli (strain B / BL21-DE3) OX=469008 GN=gmhA PE=3 SV=1	FALSE	TRUE	FALSE	82.8125	10	18	10	1.22657e+09	34.94
High	A0A140N737	UPF0304 protein YfbU OS=Escherichia coli (strain B / BL21-DE3) OX=469008 GN=yfbU PE=3 SV=1	FALSE	TRUE	FALSE	65.2439	10	30	10	1.46168e+09	51.44
High	A0A140N934	Sulfurtransferase OS=Escherichia coli (strain B / BL21-DE3) OX=469008 GN=sseA PE=4 SV=1	FALSE	TRUE	FALSE	41.9929	10	15	10	8.29977e+08	27.36
High	A0A140N4A1	Mannitol-1-phosphate 5-dehydrogenase OS=Escherichia coli (strain B / BL21-DE3) OX=469008 GN=mtlD PE=3 SV=1	FALSE	TRUE	FALSE	39.5288	11	19	11	2.34856e+08	25.38
High	A0A140N9W3	Hydroxycarboxylate dehydrogenase HcXB OS=Escherichia coli (strain B / BL21-DE3) OX=469008 GN=hcxB PE=4 SV=1	FALSE	TRUE	FALSE	37.6731	8	13	8	2.43512e+08	28.56
High	A0A140N5T5	Periplasmic serine endoprotease DegP-like OS=Escherichia coli (strain B / BL21-DE3) OX=469008 GN=degQ PE=3 SV=1	FALSE	TRUE	FALSE	33.6264	9	12	9	2.30465e+08	20.86
High	A0A140NBD3	Phospho-2-dehydro-3-deoxyheptonate aldolase OS=Escherichia coli (strain B / BL21-DE3) OX=469008 GN=aroG PE=3 SV=1	FALSE	TRUE	FALSE	39.1429	9	14	9	8.20073e+08	27.02
High	A0A140N582	Cell shape-determining protein MreB OS=Escherichia coli (strain B / BL21-DE3) OX=469008 GN=mreB PE=3 SV=1	FALSE	TRUE	FALSE	40.3458	13	21	12	1.05504e+09	30.21
High	A0A140N899	Glucose-6-phosphate 1-dehydrogenase OS=Escherichia coli (strain B / BL21-DE3) OX=469008 GN=zwf PE=3 SV=1	FALSE	TRUE	FALSE	40.1222	17	21	17	6.68014e+08	31.69
High	A0A140N9A4	PTS glucose transporter subunit IIA OS=Escherichia coli (strain B / BL21-DE3) OX=469008 GN=crr PE=4 SV=1	FALSE	TRUE	FALSE	93.4911	12	26	12	3.48783e+09	42.3
High	A0A140N528	30S ribosomal protein S19 OS=Escherichia coli (strain B / BL21-DE3) OX=469008 GN=rpsS PE=3 SV=1	FALSE	TRUE	FALSE	61.9565	7	17	7	4.5606e+08	21.6
High	A0A140NDG1	Lipoprotein OS=Escherichia coli (strain B / BL21-DE3) OX=469008 GN=ECBD_2729 PE=4 SV=1	FALSE	TRUE	FALSE	59.0643	9	23	9	7.39324e+08	36.44
High	A0A140N9F5	Outer membrane protein assembly factor BamB OS=Escherichia coli (strain B / BL21-DE3) OX=469008 GN=bamB PE=3 SV=1	FALSE	TRUE	FALSE	54.5918	11	16	11	9.48626e+08	37.05
High	A0A140NBL4	Outer membrane protein assembly factor BamA OS=Escherichia coli (strain B / BL21-DE3) OX=469008 GN=bamA PE=3 SV=1	FALSE	TRUE	FALSE	28.642	16	20	16	1.82804e+08	32.62
High	A0A140NEY8	2',3'-cyclic-nucleotide 2'-phosphodiesterase/3'-nucleotidase OS=Escherichia coli (strain B / BL21-DE3) OX=469008 GN=cpdB PE=3 SV=1	FALSE	TRUE	FALSE	37.558	15	17	15	2.03721e+08	30.96
High	A0A140N813	Agmatinase OS=Escherichia coli (strain B / BL21-DE3) OX=469008 GN=speB PE=3 SV=1	FALSE	TRUE	FALSE	26.4706	7	14	7	6.5174e+08	28.33
High	A0A140N929	DNA-binding transcriptional regulator KdgR OS=Escherichia coli (strain B / BL21-DE3) OX=469008 GN=kdgR PE=4 SV=1	FALSE	TRUE	FALSE	64.6388	14	19	14	1.42797e+08	26.66
High	A0A140ND23	3-oxoacyl-[acyl-carrier-protein] reductase OS=Escherichia coli (strain B / BL21-DE3) OX=469008 GN=fabG PE=3 SV=1	FALSE	TRUE	FALSE	56.5574	8	18	8	5.59858e+08	31.91
High	A0A140NHP0	Branched-chain-amino-acid aminotransferase OS=Escherichia coli (strain B / BL21-DE3) OX=469008 GN=ilvE PE=3 SV=1	FALSE	TRUE	FALSE	34.9515	8	12	8	5.08396e+08	30.34
High	A0A140NDC7	Protein translocase subunit SecD OS=Escherichia coli (strain B / BL21-DE3) OX=469008 GN=secD PE=3 SV=1	FALSE	TRUE	FALSE	22.1854	12	18	11	3.29985e+08	30.47
High	A0A140N6Z2	50S ribosomal protein L16 OS=Escherichia coli (strain B / BL21-DE3) OX=469008 GN=rplP PE=3 SV=1	FALSE	TRUE	FALSE	53.6765	8	19	8	6.25832e+09	36.3
High	A0A140N9K4	NADH dehydrogenase I subunit E OS=Escherichia coli (strain B / BL21-DE3) OX=469008 GN=nuoE PE=3 SV=1	FALSE	TRUE	FALSE	49.3976	7	19	7	4.50264e+08	23.38
High	A0A140N690	Glycine--tRNA ligase alpha subunit OS=Escherichia coli (strain B / BL21-DE3) OX=469008 GN=glyQ PE=3 SV=1	FALSE	TRUE	FALSE	39.604	7	16	7	5.73092e+08	30.96
High	A0A140N5B5	Alcohol dehydrogenase OS=Escherichia coli (strain B / BL21-DE3) OX=469008 GN=yqhD PE=4 SV=1	FALSE	TRUE	FALSE	43.6693	12	15	12	5.54757e+08	23.87
High	A0A140ND02	Extracellular solute-binding protein family 5 OS=Escherichia coli (strain B / BL21-DE3) OX=469008 GN=ECBD_2379 PE=3 SV=1	FALSE	TRUE	FALSE	46.2366	14	19	14	2.21954e+08	29.65
High	A0A140NCU1	Malonyl CoA-acyl carrier protein transacylase OS=Escherichia coli (strain B / BL21-DE3) OX=469008 GN=fabD PE=3 SV=1	FALSE	TRUE	FALSE	50.4854	8	12	8	1.29795e+09	24.66
High	A0A140NER9	DNA polymerase I OS=Escherichia coli (strain B / BL21-DE3) OX=469008 GN=polA PE=3 SV=1	FALSE	TRUE	FALSE	20.6897	14	16	14	1.0597e+08	19.36
High	A0A140NG32	Pantothenate synthetase OS=Escherichia coli (strain B / BL21-DE3) OX=469008 GN=panC PE=3 SV=1	FALSE	TRUE	FALSE	51.5901	11	18	11	5.3256e+08	30.38
High	A0A140NBG5	ATP-dependent Clp protease ATP-binding subunit ClpA OS=Escherichia coli (strain B / BL21-DE3) OX=469008 GN=clpA PE=3 SV=1	FALSE	TRUE	FALSE	21.504	12	16	12	2.35958e+08	27.77
High	A0A140NBG3	Esterase FrsA OS=Escherichia coli (strain B / BL21-DE3) OX=469008 GN=frsA PE=3 SV=1	FALSE	TRUE	FALSE	36.715	13	16	13	1.6834e+08	21.64
High	A0A140N770	4-hydroxy-tetrahydrodipicolinate synthase OS=Escherichia coli (strain B / BL21-DE3) OX=469008 GN=dapA PE=3 SV=1	FALSE	TRUE	FALSE	58.9041	9	22	9	1.92912e+09	30.5
High	A0A140NE46	Serine-type D-Ala-D-Ala carboxypeptidase OS=Escherichia coli (strain B / BL21-DE3) OX=469008 GN=dacC PE=3 SV=1	FALSE	TRUE	FALSE	38.25	12	17	11	6.81412e+08	24.89
High	A0A140N6R9	Shikimate kinase 1 OS=Escherichia coli (strain B / BL21-DE3) OX=469008 GN=aroK PE=3 SV=1	FALSE	TRUE	FALSE	43.1111	9	14	9	5.63301e+08	26.92
High	A0A140N5H1	DUF1043 family protein OS=Escherichia coli (strain B / BL21-DE3) OX=469008 GN=ECBD_0514 PE=4 SV=1	FALSE	TRUE	FALSE	67.4242	8	16	8	5.99467e+08	27.95
High	A0A140N6J0	DNA-directed RNA polymerase subunit omega OS=Escherichia coli (strain B / BL21-DE3) OX=469008 GN=rpoZ PE=3 SV=1	FALSE	TRUE	FALSE	78.022	7	14	7	4.52738e+08	28.28
High	A0A140N8L0	FAD-dependent pyridine nucleotide-disulphide oxidoreductase OS=Escherichia coli (strain B / BL21-DE3) OX=469008 GN=preT PE=4 SV=1	FALSE	TRUE	FALSE	35.4369	10	12	10	3.12226e+08	24.1
High	A0A140NCT2	Fumarate reductase flavoprotein subunit OS=Escherichia coli (strain B / BL21-DE3) OX=469008 GN=frdA PE=3 SV=1	FALSE	TRUE	FALSE	31.5615	13	17	13	1.62128e+08	34.69
High	A0A140N7B0	Acetylornithine/succinyldiaminopimelate aminotransferase OS=Escherichia coli (strain B / BL21-DE3) OX=469008 GN=argD PE=3 SV=1	FALSE	TRUE	FALSE	41.8719	10	13	10	4.46875e+08	22.97
High	A0A140NFC7	3-hydroxyacyl-[acyl-carrier-protein] dehydratase FabZ OS=Escherichia coli (strain B / BL21-DE3) OX=469008 GN=fabZ PE=3 SV=1	FALSE	TRUE	FALSE	50.3311	8	21	8	9.90579e+08	32.13
High	A0A140NA26	Lipopolysaccharide core heptose(II)-phosphate phosphatase OS=Escherichia coli (strain B / BL21-DE3) OX=469008 GN=ais PE=3 SV=1	FALSE	TRUE	FALSE	61.5	10	16	10	1.17205e+09	25.53
High	A0A140NE43	tRNA-2-methylthio-N(6)-dimethylallyladenosine synthase OS=Escherichia coli (strain B / BL21-DE3) OX=469008 GN=miaB PE=3 SV=1	FALSE	TRUE	FALSE	36.0759	12	13	12	2.70795e+08	21.48
High	A0A140N7I5	Universal stress protein UspF OS=Escherichia coli (strain B / BL21-DE3) OX=469008 GN=uspF PE=3 SV=1	FALSE	TRUE	FALSE	61.1111	8	14	8	4.00116e+08	16.34
High	A0A140NFT6	ATP synthase subunit delta OS=Escherichia coli (strain B / BL21-DE3) OX=469008 GN=atpH PE=3 SV=1	FALSE	TRUE	FALSE	42.9379	6	20	6	8.65987e+08	36.19
High	A0A140N5I1	GTP cyclohydrolase 1 OS=Escherichia coli (strain B / BL21-DE3) OX=469008 GN=folE PE=3 SV=1	FALSE	TRUE	FALSE	47.7477	8	14	8	7.21754e+08	12.73
High	A0A140N5I0	Peptidyl-prolyl cis-trans isomerase OS=Escherichia coli (strain B / BL21-DE3) OX=469008 GN=fkpA PE=3 SV=1	FALSE	TRUE	FALSE	56.2963	12	16	12	4.95548e+08	26.79
High	A0A140NBK3	Flavodoxin OS=Escherichia coli (strain B / BL21-DE3) OX=469008 GN=fldA PE=3 SV=1	FALSE	TRUE	FALSE	42.6136	6	14	6	2.65957e+09	19.11
High	A0A140NCM6	3'(2'),5'-bisphosphate nucleotidase CysQ OS=Escherichia coli (strain B / BL21-DE3) OX=469008 GN=cysQ PE=3 SV=1	FALSE	TRUE	FALSE	62.1951	8	12	8	3.02199e+08	30.35
High	A0A140NCJ4	D-amino acid dehydrogenase OS=Escherichia coli (strain B / BL21-DE3) OX=469008 GN=dadA PE=3 SV=1	FALSE	TRUE	FALSE	33.5648	9	14	9	3.69271e+08	21.51
High	A0A140NEV1	Probable cytosol aminopeptidase OS=Escherichia coli (strain B / BL21-DE3) OX=469008 GN=pepA PE=3 SV=1	FALSE	TRUE	FALSE	31.0139	11	17	11	7.39262e+08	31.35
High	A0A140NCP3	Thioredoxin domain protein OS=Escherichia coli (strain B / BL21-DE3) OX=469008 GN=ECBD_3164 PE=4 SV=1	FALSE	TRUE	FALSE	51.0563	8	14	8	5.01864e+08	36.34
High	A0A140N9Z6	aldehyde dehydrogenase OS=Escherichia coli (strain B / BL21-DE3) OX=469008 GN=aldA PE=3 SV=1	FALSE	TRUE	FALSE	30.6889	12	15	12	3.72427e+08	23.16
High	A0A140SSA6	Xaa-Pro dipeptidase OS=Escherichia coli (strain B / BL21-DE3) OX=469008 GN=pepQ PE=3 SV=1	FALSE	TRUE	FALSE	34.9887	11	17	11	5.22214e+08	25.04
High	A0A140NEI9	Tol-Pal system protein TolB OS=Escherichia coli (strain B / BL21-DE3) OX=469008 GN=tolB PE=3 SV=1	FALSE	TRUE	FALSE	29.7674	9	17	9	6.03677e+08	25.84
High	A0A140NAR3	Cysteine--tRNA ligase OS=Escherichia coli (strain B / BL21-DE3) OX=469008 GN=cysS PE=3 SV=1	FALSE	TRUE	FALSE	35.7918	12	13	12	1.72462e+08	19.65
High	A0A140N3H4	50S ribosomal protein L14 OS=Escherichia coli (strain B / BL21-DE3) OX=469008 GN=rplN PE=1 SV=1	FALSE	TRUE	FALSE	58.5366	8	52	7	1.54638e+09	95.83
High	A0A140N3N8	N-acetylneuraminate lyase OS=Escherichia coli (strain B / BL21-DE3) OX=469008 GN=nanA PE=3 SV=1	FALSE	TRUE	FALSE	58.5859	11	13	11	626764365	24.62
High	A0A140N8V5	CDP-diacylglycerol--serine O-phosphatidyltransferase OS=Escherichia coli (strain B / BL21-DE3) OX=469008 GN=pssA PE=3 SV=1	FALSE	TRUE	FALSE	34.1463	10	14	10	2.24104e+08	22.37
High	A0A140ND17	Protein translocase subunit SecA OS=Escherichia coli (strain B / BL21-DE3) OX=469008 GN=secA PE=2 SV=1	FALSE	TRUE	FALSE	21.4206	11	14	11	2.59713e+08	21.44
High	A0A140N9Q4	Ribonucleoside-diphosphate reductase OS=Escherichia coli (strain B / BL21-DE3) OX=469008 GN=nrdA PE=3 SV=1	FALSE	TRUE	FALSE	25.6242	15	17	15	3.99294e+08	21.43
High	A0A140N852	Alcohol dehydrogenase zinc-binding domain protein OS=Escherichia coli (strain B / BL21-DE3) OX=469008 GN=curA PE=4 SV=1	FALSE	TRUE	FALSE	40.2899	9	12	9	3.52423e+08	24.62
High	A0A140N7J2	Major outer membrane lipoprotein Lpp OS=Escherichia coli (strain B / BL21-DE3) OX=469008 GN=lpp PE=3 SV=1	FALSE	TRUE	FALSE	62.8205	8	21	8	5.10248e+09	37.07
High	A0A140N7Y4	Pseudouridine synthase OS=Escherichia coli (strain B / BL21-DE3) OX=469008 GN=rsuA PE=3 SV=1	FALSE	TRUE	FALSE	31.1688	4	10	4	1.42801e+08	16.46
High	A0A140NEN8	Negative modulator of initiation of replication OS=Escherichia coli (strain B / BL21-DE3) OX=469008 GN=seqA PE=3 SV=1	FALSE	TRUE	FALSE	46.9613	8	16	8	4.41628e+08	27.08
High	A0A140NB54	RNA chaperone ProQ OS=Escherichia coli (strain B / BL21-DE3) OX=469008 GN=proQ PE=3 SV=1	FALSE	TRUE	FALSE	44.3966	8	12	8	7.42305e+08	22.65
High	A0A140NCI3	Phage shock protein A, PspA OS=Escherichia coli (strain B / BL21-DE3) OX=469008 GN=pspA PE=3 SV=1	FALSE	TRUE	FALSE	46.8468	7	13	7	2.59566e+08	29.09
High	A0A140N782	Sulfatase OS=Escherichia coli (strain B / BL21-DE3) OX=469008 GN=ECBD_2141 PE=3 SV=1	FALSE	TRUE	FALSE	30.8929	11	16	11	2.57511e+08	26.78
High	A0A140N619	Glycerol-3-phosphate dehydrogenase OS=Escherichia coli (strain B / BL21-DE3) OX=469008 GN=glpA PE=3 SV=1	FALSE	TRUE	FALSE	34.8708	11	12	11	3.10369e+08	19.81
High	A0A140SSB3	Bifunctional protein GlmU OS=Escherichia coli (strain B / BL21-DE3) OX=469008 GN=glmU PE=3 SV=1	FALSE	TRUE	FALSE	32.8947	12	20	12	2.74627e+08	28.25
High	A0A140NEW5	Aminotransferase OS=Escherichia coli (strain B / BL21-DE3) OX=469008 GN=tyrB PE=3 SV=1	FALSE	TRUE	FALSE	26.9521	8	10	8	5.32354e+08	19.15
High	A0A140NDD7	Phosphoethanolamine transferase CptA OS=Escherichia coli (strain B / BL21-DE3) OX=469008 GN=ECBD_4069 PE=4 SV=1	FALSE	TRUE	FALSE	36.3951	14	18	14	3.61877e+08	32.27
High	A0A140N5P6	Gamma carbonic anhydrase family protein OS=Escherichia coli (strain B / BL21-DE3) OX=469008 GN=ECBD_0472 PE=4 SV=1	FALSE	TRUE	FALSE	71.1957	12	16	12	3.11238e+08	19.88
High	A0A140NE42	LPS-assembly lipoprotein LptE OS=Escherichia coli (strain B / BL21-DE3) OX=469008 GN=lptE PE=3 SV=1	FALSE	TRUE	FALSE	26.943	5	14	5	1.57812e+08	32.63
High	A0A140NC46	N-acetylglucosamine-6-phosphate deacetylase OS=Escherichia coli (strain B / BL21-DE3) OX=469008 GN=nagA PE=3 SV=1	FALSE	TRUE	FALSE	29.0576	6	11	6	1.49659e+08	21.06
High	A0A140N8N2	Ferritin OS=Escherichia coli (strain B / BL21-DE3) OX=469008 GN=ftnA PE=3 SV=1	FALSE	TRUE	FALSE	67.8788	8	24	8	8.22195e+09	48.58
High	A0A140N9N3	Zinc ribbon-containing protein OS=Escherichia coli (strain B / BL21-DE3) OX=469008 GN=ECBD_3008 PE=4 SV=1	FALSE	TRUE	FALSE	59.375	6	10	6	4.45229e+08	22.22
High	A0A140N539	Dihydrofolate synthase/folylpolyglutamate synthase OS=Escherichia coli (strain B / BL21-DE3) OX=469008 GN=folC PE=3 SV=1	FALSE	TRUE	FALSE	31.9905	7	8	7	2.30519e+08	15.52
High	C5W331	Ribosomal RNA small subunit methyltransferase H OS=Escherichia coli (strain B / BL21-DE3) OX=469008 GN=rsmH PE=3 SV=1	FALSE	TRUE	FALSE	41.2141	9	9	9	1.03355e+08	21.54
High	A0A140NDF0	D-alanine--D-alanine ligase OS=Escherichia coli (strain B / BL21-DE3) OX=469008 GN=ddl PE=3 SV=1	FALSE	TRUE	FALSE	32.4176	9	10	9	1.572e+08	17.1
High	A0A140NBT9	Cell division protein FtsA OS=Escherichia coli (strain B / BL21-DE3) OX=469008 GN=ftsA PE=3 SV=1	FALSE	TRUE	FALSE	41.9048	9	11	9	3.2235e+08	12.6
High	A0A140N7L9	30S ribosomal protein S11 OS=Escherichia coli (strain B / BL21-DE3) OX=469008 GN=rpsK PE=3 SV=1	FALSE	TRUE	FALSE	51.1628	7	24	5	4.18926e+09	30.05
High	A0A140NCK3	Inhibitor of g-type lysozyme OS=Escherichia coli (strain B / BL21-DE3) OX=469008 GN=ECBD_2444 PE=4 SV=1	FALSE	TRUE	FALSE	62.406	8	14	8	6.51288e+08	19.17
High	A0A140N3B4	Uronate isomerase OS=Escherichia coli (strain B / BL21-DE3) OX=469008 GN=uxaC PE=3 SV=1	FALSE	TRUE	FALSE	35.5319	11	14	11	3.13727e+08	20.97
High	A0A140NEZ7	Nucleoside-specific channel-forming protein Tsx OS=Escherichia coli (strain B / BL21-DE3) OX=469008 GN=tsx PE=3 SV=1	FALSE	TRUE	FALSE	40.8163	8	13	8	8.99995e+08	25.4
High	A0A140N5E1	Ribulose-phosphate 3-epimerase OS=Escherichia coli (strain B / BL21-DE3) OX=469008 GN=rpe PE=3 SV=1	FALSE	TRUE	FALSE	35.1111	6	12	6	8.30813e+08	22.82
High	A0A140N914	Putative NAD(P)H nitroreductase OS=Escherichia coli (strain B / BL21-DE3) OX=469008 GN=ECBD_1879 PE=3 SV=1	FALSE	TRUE	FALSE	53.0055	6	11	6	6.52855e+08	9.71
High	A0A140NAC4	PhoH family protein OS=Escherichia coli (strain B / BL21-DE3) OX=469008 GN=ECBD_2991 PE=3 SV=1	FALSE	TRUE	FALSE	47.0752	12	13	12	5.42257e+08	18.75
High	A0A140NAB7	Glutamine--tRNA ligase OS=Escherichia coli (strain B / BL21-DE3) OX=469008 GN=glnS PE=1 SV=1	FALSE	TRUE	FALSE	31.769	11	12	10	1.74034e+08	16.71
High	A0A140NFU3	30S ribosomal protein S20 OS=Escherichia coli (strain B / BL21-DE3) OX=469008 GN=rpsT PE=3 SV=1	FALSE	TRUE	FALSE	43.6782	6	22	6	7.77883e+08	34.74
High	A0A140N4M5	Inositol-1-monophosphatase OS=Escherichia coli (strain B / BL21-DE3) OX=469008 GN=suhB PE=3 SV=1	FALSE	TRUE	FALSE	44.9438	8	10	8	2.43308e+08	20.13
High	A0A140N731	Cytoskeleton protein RodZ OS=Escherichia coli (strain B / BL21-DE3) OX=469008 GN=rodZ PE=3 SV=1	FALSE	TRUE	FALSE	27.8932	6	9	6	4.20392e+08	21.57
High	A0A140N7T7	DegT/DnrJ/EryC1/StrS aminotransferase OS=Escherichia coli (strain B / BL21-DE3) OX=469008 GN=vioA PE=3 SV=1	FALSE	TRUE	FALSE	35.1351	9	14	9	3.0169e+08	27.87
High	A0A140SS84	Acetylornithine deacetylase OS=Escherichia coli (strain B / BL21-DE3) OX=469008 GN=argE PE=3 SV=1	FALSE	TRUE	FALSE	49.6084	13	15	13	1.92537e+08	25.18
High	A0A140N7C6	NH(3)-dependent NAD(+) synthetase OS=Escherichia coli (strain B / BL21-DE3) OX=469008 GN=nadE PE=3 SV=1	FALSE	TRUE	FALSE	49.8182	11	14	11	4.3688e+08	20.53
High	A0A140N7C5	Transcription elongation factor GreA OS=Escherichia coli (strain B / BL21-DE3) OX=469008 GN=greA PE=3 SV=1	FALSE	TRUE	FALSE	52.5316	7	11	7	5.22602e+08	20.78
High	A0A140N560	NADH-quinone oxidoreductase subunit B OS=Escherichia coli (strain B / BL21-DE3) OX=469008 GN=nuoB PE=3 SV=1	FALSE	TRUE	FALSE	43.1818	10	15	10	1.13222e+09	20.62
High	A0A140NBC5	Glutamate dehydrogenase OS=Escherichia coli (strain B / BL21-DE3) OX=469008 GN=gdhA PE=3 SV=1	FALSE	TRUE	FALSE	19.2394	6	9	6	1.5433e+08	14.81
High	A0A140N6I5	Selenide, water dikinase OS=Escherichia coli (strain B / BL21-DE3) OX=469008 GN=selD PE=3 SV=1	FALSE	TRUE	FALSE	37.7522	8	9	8	5.22532e+08	20.3
High	A0A140N537	30S ribosomal protein S8 OS=Escherichia coli (strain B / BL21-DE3) OX=469008 GN=rpsH PE=3 SV=1	FALSE	TRUE	FALSE	54.6154	8	19	7	7.65064e+08	30.57
High	A0A140N9V3	Cationic amino acid ABC transporter, periplasmic binding protein OS=Escherichia coli (strain B / BL21-DE3) OX=469008 GN=glnH PE=3 SV=1	FALSE	TRUE	FALSE	53.629	9	12	9	9.04153e+08	19.37
High	A0A140N711	50S ribosomal protein L15 OS=Escherichia coli (strain B / BL21-DE3) OX=469008 GN=rplO PE=3 SV=1	FALSE	TRUE	FALSE	63.1944	11	29	11	4.63164e+09	46
High	A0A140NFY3	Carbamoyl-phosphate synthase large chain OS=Escherichia coli (strain B / BL21-DE3) OX=469008 GN=carB PE=3 SV=1	FALSE	TRUE	FALSE	16.7754	13	14	13	219834803	20.15
High	A0A140NGA3	UPF0438 protein YifE OS=Escherichia coli (strain B / BL21-DE3) OX=469008 GN=maoP PE=3 SV=1	FALSE	TRUE	FALSE	79.4643	9	15	9	4.03378e+08	26.67
High	A0A140NAN4	LPS O-antigen chain length determinant protein WzzB OS=Escherichia coli (strain B / BL21-DE3) OX=469008 GN=wzzB PE=4 SV=1	FALSE	TRUE	FALSE	51.8405	9	9	9	5.21115e+08	21.73
High	A0A140NBL6	Molybdopterin molybdenumtransferase OS=Escherichia coli (strain B / BL21-DE3) OX=469008 GN=moeA PE=3 SV=1	FALSE	TRUE	FALSE	34.0633	9	10	9	3.51019e+08	24.31
High	A0A140NF50	Fumarate reductase iron-sulfur subunit OS=Escherichia coli (strain B / BL21-DE3) OX=469008 GN=frdB PE=3 SV=1	FALSE	TRUE	FALSE	24.1803	5	11	5	2.1042e+08	18.72
High	A0A140NAY3	Histidine biosynthesis bifunctional protein HisB OS=Escherichia coli (strain B / BL21-DE3) OX=469008 GN=hisB PE=3 SV=1	FALSE	TRUE	FALSE	38.8732	8	11	8	1.55569e+08	24.61
High	A0A140NB77	Phosphoenolpyruvate synthase OS=Escherichia coli (strain B / BL21-DE3) OX=469008 GN=ppsA PE=3 SV=1	FALSE	TRUE	FALSE	19.697	13	15	13	6.45957e+08	20.77
High	A0A140NH75	Cell division protein ZapB OS=Escherichia coli (strain B / BL21-DE3) OX=469008 GN=zapB PE=3 SV=1	FALSE	TRUE	FALSE	84.8101	6	10	6	7.6188e+08	21.95
High	A0A140NDJ6	Hydrolase OS=Escherichia coli (strain B / BL21-DE3) OX=469008 GN=ECBD_2698 PE=4 SV=1	FALSE	TRUE	FALSE	51.4423	6	8	6	4.72008e+08	17.54
High	A0A140N6C1	DNA gyrase subunit B OS=Escherichia coli (strain B / BL21-DE3) OX=469008 GN=gyrB PE=3 SV=1	FALSE	TRUE	FALSE	21.6418	11	13	11	3.1912e+08	25.54
High	A0A140NCT4	Efflux pump membrane transporter OS=Escherichia coli (strain B / BL21-DE3) OX=469008 GN=ECBD_3194 PE=3 SV=1	FALSE	TRUE	FALSE	8.86559	7	9	7	1.59519e+08	14.55
High	A0A140NGG2	Peptidyl-prolyl cis-trans isomerase OS=Escherichia coli (strain B / BL21-DE3) OX=469008 GN=ECBD_3822 PE=3 SV=1	FALSE	TRUE	FALSE	35.4369	9	12	9	2.02134e+08	22.04
High	A0A140NAX1	L-serine dehydratase OS=Escherichia coli (strain B / BL21-DE3) OX=469008 GN=sdaA PE=3 SV=1	FALSE	TRUE	FALSE	26.2115	8	11	8	1.74458e+08	22.97
High	A0A140N9X9	Glutaredoxin OS=Escherichia coli (strain B / BL21-DE3) OX=469008 GN=grxD PE=3 SV=1	FALSE	TRUE	FALSE	58.2609	7	19	7	2.26209e+09	43.24
High	A0A140NF32	50S ribosomal protein L11 OS=Escherichia coli (strain B / BL21-DE3) OX=469008 GN=rplK PE=3 SV=1	FALSE	TRUE	FALSE	35.9155	6	25	6	5.95021e+08	45.44
High	A0A140SSC0	Thioredoxin OS=Escherichia coli (strain B / BL21-DE3) OX=469008 GN=trxA PE=3 SV=1	FALSE	TRUE	FALSE	58.7156	6	12	6	2.36314e+09	24.34
High	A0A140N811	30S ribosomal protein S15 OS=Escherichia coli (strain B / BL21-DE3) OX=469008 GN=rpsO PE=3 SV=1	FALSE	TRUE	FALSE	60.6742	8	18	5	1.44723e+09	14.28
High	A0A140N9D3	Phosphocarrier protein Hpr OS=Escherichia coli (strain B / BL21-DE3) OX=469008 GN=ptsH PE=4 SV=1	FALSE	TRUE	FALSE	87.0588	5	22	5	2.57526e+09	30.36
High	A0A140NDR8	Ubiquinone/menaquinone biosynthesis C-methyltransferase UbiE OS=Escherichia coli (strain B / BL21-DE3) OX=469008 GN=ubiE PE=3 SV=1	FALSE	TRUE	FALSE	45.4183	9	11	9	5.55295e+08	16.15
High	A0A140NDW1	Pyruvate formate-lyase-activating enzyme OS=Escherichia coli (strain B / BL21-DE3) OX=469008 GN=pflA PE=3 SV=1	FALSE	TRUE	FALSE	45.5285	8	15	8	2.05548e+08	14.55
High	A0A140NGH1	30S ribosomal protein S18 OS=Escherichia coli (strain B / BL21-DE3) OX=469008 GN=rpsR PE=3 SV=1	FALSE	TRUE	FALSE	57.3333	6	18	6	2.69508e+09	22.75
High	A0A140NA20	Dihydroxyacetone kinase subunit DhaK OS=Escherichia coli (strain B / BL21-DE3) OX=469008 GN=dhaK PE=4 SV=1	FALSE	TRUE	FALSE	35.9551	7	9	7	2.1804e+08	19.46
High	A0A140NE18	Hypoxanthine phosphoribosyltransferase OS=Escherichia coli (strain B / BL21-DE3) OX=469008 GN=ECBD_3494 PE=3 SV=1	FALSE	TRUE	FALSE	43.956	9	13	9	4.58221e+08	17.74
High	A0A140NAH0	Class I fructose-bisphosphate aldolase OS=Escherichia coli (strain B / BL21-DE3) OX=469008 GN=fbaB PE=4 SV=1	FALSE	TRUE	FALSE	32.2857	8	11	8	3.5759e+08	21.17
High	A0A140N7B3	4-aminobutyrate aminotransferase OS=Escherichia coli (strain B / BL21-DE3) OX=469008 GN=gabT PE=3 SV=1	FALSE	TRUE	FALSE	30.5164	9	11	8	5.20957e+08	12.51
High	A0A140N8W1	Signal peptidase I OS=Escherichia coli (strain B / BL21-DE3) OX=469008 GN=lepB PE=3 SV=1	FALSE	TRUE	FALSE	27.4691	8	10	8	2.2496e+08	15.17
High	A0A140N3I5	2,5-didehydrogluconate reductase OS=Escherichia coli (strain B / BL21-DE3) OX=469008 GN=dkgA PE=4 SV=1	FALSE	TRUE	FALSE	41.8182	7	13	7	3.07695e+08	14.99
High	A0A140N9F0	Adenosine deaminase OS=Escherichia coli (strain B / BL21-DE3) OX=469008 GN=add PE=3 SV=1	FALSE	TRUE	FALSE	31.2312	6	8	6	3.11925e+08	15.25
High	A0A140N319	RNase adapter protein RapZ OS=Escherichia coli (strain B / BL21-DE3) OX=469008 GN=rapZ PE=3 SV=1	FALSE	TRUE	FALSE	35.9155	7	9	7	2.19951e+08	23.12
High	A0A140NEJ3	6,7-dihydropteridine reductase OS=Escherichia coli (strain B / BL21-DE3) OX=469008 GN=nfsB PE=3 SV=1	FALSE	TRUE	FALSE	51.1521	9	13	9	537426216	19.42
High	A0A140NDQ1	Xanthine-guanine phosphoribosyltransferase OS=Escherichia coli (strain B / BL21-DE3) OX=469008 GN=gpt PE=3 SV=1	FALSE	TRUE	FALSE	28.2895	4	9	4	2.78402e+08	15.36
High	A0A140N9J5	Peptide methionine sulfoxide reductase MsrB OS=Escherichia coli (strain B / BL21-DE3) OX=469008 GN=msrB PE=3 SV=1	FALSE	TRUE	FALSE	60.5839	4	11	4	3.3628e+08	17.69
High	A0A140NBX8	Arginine ABC transporter substrate-binding protein OS=Escherichia coli (strain B / BL21-DE3) OX=469008 GN=artJ PE=3 SV=1	FALSE	TRUE	FALSE	51.4403	8	9	8	4.27085e+08	17.99
High	A0A140N644	Glutamate--cysteine ligase OS=Escherichia coli (strain B / BL21-DE3) OX=469008 GN=gshA PE=3 SV=1	FALSE	TRUE	FALSE	31.0811	9	9	9	2.53117e+08	15.15
High	A0A140NAE3	Glyoxylate/hydroxypyruvate reductase A OS=Escherichia coli (strain B / BL21-DE3) OX=469008 GN=ghrA PE=1 SV=1	FALSE	TRUE	FALSE	54.4872	9	11	9	3.32666e+08	12.68
High	A0A140N9H2	D-serine dehydratase OS=Escherichia coli (strain B / BL21-DE3) OX=469008 GN=dsdA PE=3 SV=1	FALSE	TRUE	FALSE	32.8054	11	17	11	2.78458e+08	17.61
High	A0A140N751	Uracil phosphoribosyltransferase OS=Escherichia coli (strain B / BL21-DE3) OX=469008 GN=upp PE=3 SV=1	FALSE	TRUE	FALSE	47.5962	6	12	6	1.42648e+09	30.4
High	A0A140ND10	Peptidyl-prolyl cis-trans isomerase OS=Escherichia coli (strain B / BL21-DE3) OX=469008 GN=ppiB PE=3 SV=1	FALSE	TRUE	FALSE	58.5366	9	23	9	3.83844e+08	35.87
High	A0A140ND69	Gamma-glutamyl phosphate reductase OS=Escherichia coli (strain B / BL21-DE3) OX=469008 GN=proA PE=3 SV=1	FALSE	TRUE	FALSE	27.0983	8	9	8	4.73332e+07	16.58
High	A0A140N394	Two component transcriptional regulator, winged helix family OS=Escherichia coli (strain B / BL21-DE3) OX=469008 GN=ECBD_0340 PE=4 SV=1	FALSE	TRUE	FALSE	44.3515	9	15	9	1.29253e+09	15.01
High	A0A140SSB8	Uroporphyrinogen-III C-methyltransferase OS=Escherichia coli (strain B / BL21-DE3) OX=469008 GN=hemX PE=4 SV=1	FALSE	TRUE	FALSE	31.4214	9	10	9	2.64198e+08	23.37
High	A0A140N9J8	Transketolase OS=Escherichia coli (strain B / BL21-DE3) OX=469008 GN=tkt PE=3 SV=1	FALSE	TRUE	FALSE	20.09	8	14	7	1.32911e+08	23.89
High	A0A140N6P6	2-oxoglutarate reductase OS=Escherichia coli (strain B / BL21-DE3) OX=469008 GN=serA PE=3 SV=1	FALSE	TRUE	FALSE	20.2439	8	12	8	2.54955e+08	18.63
High	A0A140N793	Chaperone protein HscA OS=Escherichia coli (strain B / BL21-DE3) OX=469008 GN=hscA PE=3 SV=1	FALSE	TRUE	FALSE	19.1558	6	8	6	6.81679e+07	7.06
High	A0A140N6B2	Oxidative stress defense protein OS=Escherichia coli (strain B / BL21-DE3) OX=469008 GN=ECBD_0816 PE=4 SV=1	FALSE	TRUE	FALSE	31.3008	5	10	5	2.84712e+08	12.98
High	A0A140N9C4	17 kDa surface antigen OS=Escherichia coli (strain B / BL21-DE3) OX=469008 GN=slyB PE=4 SV=1	FALSE	TRUE	FALSE	38.7097	5	18	5	9.90422e+08	36.74
High	A0A140NEN6	10 kDa chaperonin OS=Escherichia coli (strain B / BL21-DE3) OX=469008 GN=groS PE=3 SV=1	FALSE	TRUE	FALSE	64.9485	6	47	6	4.22905e+09	99.09
High	A0A140N4M0	50S ribosomal protein L17 OS=Escherichia coli (strain B / BL21-DE3) OX=469008 GN=rplQ PE=3 SV=1	FALSE	TRUE	FALSE	47.2441	7	19	7	1.59972e+09	35.11
High	A0A140N729	Phage sensitivity protein DcrB OS=Escherichia coli (strain B / BL21-DE3) OX=469008 GN=dcrB PE=4 SV=1	FALSE	TRUE	FALSE	40.5405	5	12	5	4.33384e+08	20.43
High	A0A140N8J7	dTDP-4-dehydrorhamnose reductase OS=Escherichia coli (strain B / BL21-DE3) OX=469008 GN=rfbD PE=3 SV=1	FALSE	TRUE	FALSE	61.8729	8	8	8	2.82112e+08	21.48
High	A0A140NCQ6	Adenylosuccinate lyase OS=Escherichia coli (strain B / BL21-DE3) OX=469008 GN=purB PE=3 SV=1	FALSE	TRUE	FALSE	28.7281	10	13	9	6.50584e+08	15.45
High	A0A140NHP9	Periplasmic binding protein/LacI transcriptional regulator OS=Escherichia coli (strain B / BL21-DE3) OX=469008 GN=rbsB PE=4 SV=1	FALSE	TRUE	FALSE	30.0676	7	8	7	1.55902e+08	14.27
High	A0A140N9G6	Outer membrane protein assembly factor BamD OS=Escherichia coli (strain B / BL21-DE3) OX=469008 GN=bamD PE=3 SV=1	FALSE	TRUE	FALSE	36.7347	6	8	6	2.80144e+08	16.99
High	A0A140NAM8	Glutamate 5-kinase OS=Escherichia coli (strain B / BL21-DE3) OX=469008 GN=proB PE=3 SV=1	FALSE	TRUE	FALSE	21.5259	5	8	5	1.32959e+08	18.68
High	A0A140NAD8	Pyrimidine-specific ribonucleoside hydrolase RihA OS=Escherichia coli (strain B / BL21-DE3) OX=469008 GN=rihA PE=3 SV=1	FALSE	TRUE	FALSE	25.7235	6	9	6	1.51462e+08	12.4
High	A0A140NFF9	YihD family protein OS=Escherichia coli (strain B / BL21-DE3) OX=469008 GN=ECBD_4172 PE=4 SV=1	FALSE	TRUE	FALSE	53.9326	6	9	6	3.99612e+08	18.73
High	A0A140N2Z9	30S ribosomal protein S9 OS=Escherichia coli (strain B / BL21-DE3) OX=469008 GN=rpsI PE=3 SV=1	FALSE	TRUE	FALSE	60.7692	11	24	11	6.47605e+08	21.62
High	A0A140NE56	Mannonate dehydratase OS=Escherichia coli (strain B / BL21-DE3) OX=469008 GN=uxuA PE=3 SV=1	FALSE	TRUE	FALSE	33.5025	9	10	9	2.1712e+08	22.29
High	A0A140SSB1	Ribosomal RNA small subunit methyltransferase G OS=Escherichia coli (strain B / BL21-DE3) OX=469008 GN=rsmG PE=3 SV=1	FALSE	TRUE	FALSE	49.7585	7	10	7	1.54024e+08	16.64
High	A0A140NF64	Cytosine deaminase OS=Escherichia coli (strain B / BL21-DE3) OX=469008 GN=codA PE=4 SV=1	FALSE	TRUE	FALSE	25.5269	6	10	6	234991184	16.94
High	A0A140N5D3	Glutathione S-transferase domain protein OS=Escherichia coli (strain B / BL21-DE3) OX=469008 GN=yghU PE=4 SV=1	FALSE	TRUE	FALSE	31.9444	7	11	7	2.33124e+08	15.27
High	A0A140NHL8	Transcription termination/antitermination protein NusG OS=Escherichia coli (strain B / BL21-DE3) OX=469008 GN=nusG PE=3 SV=1	FALSE	TRUE	FALSE	63.5359	9	17	9	1.53009e+09	18.36
High	A0A140N8X2	Two component transcriptional regulator, winged helix family OS=Escherichia coli (strain B / BL21-DE3) OX=469008 GN=phoP PE=4 SV=1	FALSE	TRUE	FALSE	39.0135	6	8	6	2.41755e+08	14.74
High	A0A140NE13	Ferric uptake regulation protein OS=Escherichia coli (strain B / BL21-DE3) OX=469008 GN=fur PE=3 SV=1	FALSE	TRUE	FALSE	62.8378	5	11	5	8.25e+08	18.37
High	A0A140NE35	GMP reductase OS=Escherichia coli (strain B / BL21-DE3) OX=469008 GN=guaC PE=3 SV=1	FALSE	TRUE	FALSE	19.3084	6	9	6	9.97949e+07	15.84
High	A0A140NFG5	Methionine aminopeptidase OS=Escherichia coli (strain B / BL21-DE3) OX=469008 GN=map PE=1 SV=1	FALSE	TRUE	FALSE	46.2121	7	12	7	3.88942e+08	23.8
High	A0A140NCT8	Phosphoenolpyruvate--glycerone phosphotransferase OS=Escherichia coli (strain B / BL21-DE3) OX=469008 GN=dhaM PE=3 SV=1	FALSE	TRUE	FALSE	30.7203	8	10	8	3.87264e+08	16.09
High	A0A140N8N3	UTP--glucose-1-phosphate uridylyltransferase OS=Escherichia coli (strain B / BL21-DE3) OX=469008 GN=galU PE=3 SV=1	FALSE	TRUE	FALSE	32.4503	6	10	6	5.45617e+08	15.77
High	A0A140NA86	Penicillin-binding protein activator LpoB OS=Escherichia coli (strain B / BL21-DE3) OX=469008 GN=lpoB PE=3 SV=1	FALSE	TRUE	FALSE	36.1502	5	11	5	6.17188e+07	26.32
High	A0A140N7A3	Lipopolysaccharide export system ATP-binding protein LptB OS=Escherichia coli (strain B / BL21-DE3) OX=469008 GN=lptB PE=3 SV=1	FALSE	TRUE	FALSE	43.9834	7	9	7	3.05149e+08	9.32
High	A0A140N4F6	Ribose-5-phosphate isomerase A OS=Escherichia coli (strain B / BL21-DE3) OX=469008 GN=rpiA PE=3 SV=1	FALSE	TRUE	FALSE	31.9635	8	20	8	4.76504e+08	26.85
High	A0A140N4Y2	Peptidyl-prolyl cis-trans isomerase OS=Escherichia coli (strain B / BL21-DE3) OX=469008 GN=ppiA PE=3 SV=1	FALSE	TRUE	FALSE	56.3158	6	8	6	9.69497e+08	19.85
High	A0A140N763	RNA binding S1 domain protein OS=Escherichia coli (strain B / BL21-DE3) OX=469008 GN=ECBD_0338 PE=4 SV=1	FALSE	TRUE	FALSE	13.8422	8	11	8	9.41694e+07	15.77
High	A0A140NBS1	50S ribosomal protein L20 OS=Escherichia coli (strain B / BL21-DE3) OX=469008 GN=rplT PE=3 SV=1	FALSE	TRUE	FALSE	35.5932	8	33	8	2.22088e+08	29.28
High	A0A140NHG8	Maltose/maltodextrin import ATP-binding protein MalK OS=Escherichia coli (strain B / BL21-DE3) OX=469008 GN=malK PE=3 SV=1	FALSE	TRUE	FALSE	23.9892	7	12	7	7.56694e+08	19.23
High	A0A140NFA9	DNA-binding protein HU-beta OS=Escherichia coli (strain B / BL21-DE3) OX=469008 GN=hupB PE=3 SV=1	FALSE	TRUE	FALSE	74.4444	8	20	8	951840930	27.06
High	A0A140NE23	Asparagine synthase (glutamine-hydrolyzing) OS=Escherichia coli (strain B / BL21-DE3) OX=469008 GN=asnB PE=3 SV=1	FALSE	TRUE	FALSE	12.6354	5	8	5	1.13941e+08	10.33
High	A0A140NBB5	Alcohol dehydrogenase zinc-binding domain protein OS=Escherichia coli (strain B / BL21-DE3) OX=469008 GN=yahK PE=3 SV=1	FALSE	TRUE	FALSE	35.5301	9	9	9	3.26651e+08	10.77
High	A0A140N604	Penicillin-binding protein activator LpoA OS=Escherichia coli (strain B / BL21-DE3) OX=469008 GN=lpoA PE=3 SV=1	FALSE	TRUE	FALSE	15.3392	7	7	7	1.26826e+08	14.29
High	A0A140NC86	CNNM family magnesium/cobalt transport protein CorC OS=Escherichia coli (strain B / BL21-DE3) OX=469008 GN=corC PE=3 SV=1	FALSE	TRUE	FALSE	28.0822	6	8	6	9.82785e+07	19.78
High	A0A140N4H3	30S ribosomal protein S12 OS=Escherichia coli (strain B / BL21-DE3) OX=469008 GN=rpsL PE=3 SV=1	FALSE	TRUE	FALSE	47.5806	6	38	5	2.04413e+08	69.84
High	A0A140NBJ5	Outer membrane lipoprotein RcsF OS=Escherichia coli (strain B / BL21-DE3) OX=469008 GN=rcsF PE=3 SV=1	FALSE	TRUE	FALSE	55.9701	5	9	5	8.42379e+08	15.22
High	A0A140NDU1	Non-specific ribonucleoside hydrolase RihC OS=Escherichia coli (strain B / BL21-DE3) OX=469008 GN=rihC PE=3 SV=1	FALSE	TRUE	FALSE	22.3684	5	9	5	1.80902e+08	19.74
High	A0A140NFZ9	Chaperone protein DnaJ OS=Escherichia coli (strain B / BL21-DE3) OX=469008 GN=dnaJ PE=3 SV=1	FALSE	TRUE	FALSE	29.5213	7	9	7	4.3061e+08	16.7
High	A0A140N6Z6	30S ribosomal protein S17 OS=Escherichia coli (strain B / BL21-DE3) OX=469008 GN=rpsQ PE=3 SV=1	FALSE	TRUE	FALSE	61.9048	7	11	6	2.62109e+09	24.85
High	A0A140NAF5	AMP nucleosidase OS=Escherichia coli (strain B / BL21-DE3) OX=469008 GN=amn PE=3 SV=1	FALSE	TRUE	FALSE	24.1736	7	7	7	2.96166e+08	8.18
High	A0A140NDE9	6-N-hydroxylaminopurine resistance protein YcbX OS=Escherichia coli (strain B / BL21-DE3) OX=469008 GN=ycbX PE=4 SV=1	FALSE	TRUE	FALSE	33.0623	8	9	8	1.02948e+08	13.64
High	A0A140NC45	ABC transporter related OS=Escherichia coli (strain B / BL21-DE3) OX=469008 GN=ECBD_2803 PE=4 SV=1	FALSE	TRUE	FALSE	22.8302	10	13	10	1.34198e+08	19.65
High	A0A140N5R4	Oxidoreductase OS=Escherichia coli (strain B / BL21-DE3) OX=469008 GN=ECBD_0493 PE=4 SV=1	FALSE	TRUE	FALSE	37.037	7	8	7	3.78275e+08	17.22
High	A0A140N893	D-isomer specific 2-hydroxyacid dehydrogenase NAD-binding OS=Escherichia coli (strain B / BL21-DE3) OX=469008 GN=ldhA PE=1 SV=1	FALSE	TRUE	FALSE	34.3465	8	9	8	4.5534e+08	11.37
High	A0A140N8S5	Protein GrpE OS=Escherichia coli (strain B / BL21-DE3) OX=469008 GN=grpE PE=3 SV=1	FALSE	TRUE	FALSE	49.7462	8	11	8	4.37466e+08	26.12
High	A0A140N7R1	Glutathionylspermidine synthase family protein OS=Escherichia coli (strain B / BL21-DE3) OX=469008 GN=ECBD_0702 PE=4 SV=1	FALSE	TRUE	FALSE	20.7254	6	10	6	1.2898e+08	22.04
High	A0A140NCN3	Putrescine-binding periplasmic protein OS=Escherichia coli (strain B / BL21-DE3) OX=469008 GN=potD PE=3 SV=1	FALSE	TRUE	FALSE	25	7	9	7	9.67778e+07	11.15
High	A0A140N2P2	Rhodanese domain protein OS=Escherichia coli (strain B / BL21-DE3) OX=469008 GN=ECBD_0114 PE=4 SV=1	FALSE	TRUE	FALSE	53.8462	6	12	6	374079177	21.71
High	A0A140NF57	DNA-binding transcriptional regulator OxyR OS=Escherichia coli (strain B / BL21-DE3) OX=469008 GN=oxyR PE=3 SV=1	FALSE	TRUE	FALSE	26.5574	6	9	6	1.88859e+08	18.29
High	A0A140NCB5	Transcriptional repressor NrdR OS=Escherichia coli (strain B / BL21-DE3) OX=469008 GN=nrdR PE=3 SV=1	FALSE	TRUE	FALSE	48.3221	6	9	6	1.59556e+08	11.02
High	A0A140N919	Ancillary SecYEG translocon subunit YfgM OS=Escherichia coli (strain B / BL21-DE3) OX=469008 GN=yfgM PE=3 SV=1	FALSE	TRUE	FALSE	59.2233	6	9	6	4.66846e+08	11.55
High	A0A140N494	Serine acetyltransferase OS=Escherichia coli (strain B / BL21-DE3) OX=469008 GN=cysE PE=3 SV=1	FALSE	TRUE	FALSE	44.3223	8	11	8	2.09193e+08	14.9
High	A0A140NG68	Cell division protein ZapD OS=Escherichia coli (strain B / BL21-DE3) OX=469008 GN=zapD PE=3 SV=1	FALSE	TRUE	FALSE	34.413	9	9	9	8.48067e+07	14.64
High	A0A140NGE4	Gfo/Idh/MocA family oxidoreductase OS=Escherichia coli (strain B / BL21-DE3) OX=469008 GN=ECBD_3762 PE=4 SV=1	FALSE	TRUE	FALSE	26.0753	7	11	7	2.01808e+08	15.67
High	A0A140NCB1	Alcohol dehydrogenase zinc-binding domain protein OS=Escherichia coli (strain B / BL21-DE3) OX=469008 GN=ECBD_3982 PE=3 SV=1	FALSE	TRUE	FALSE	44.0367	7	9	7	6.18623e+08	18.48
High	A0A140N8B4	30S ribosomal protein S21 OS=Escherichia coli (strain B / BL21-DE3) OX=469008 GN=rpsU PE=3 SV=1	FALSE	TRUE	FALSE	47.8873	9	13	6	8.1185e+08	16.31
High	A0A140NAD7	Peroxiredoxin OS=Escherichia coli (strain B / BL21-DE3) OX=469008 GN=osmC PE=4 SV=1	FALSE	TRUE	FALSE	37.0629	5	8	5	2.86004e+08	17.55
High	A0A140N6J8	Alpha-D-glucosyl-1-phosphate uridylyltransferase OS=Escherichia coli (strain B / BL21-DE3) OX=469008 GN=galF PE=3 SV=1	FALSE	TRUE	FALSE	30.9764	7	7	7	1.85847e+08	10.71
High	A0A140N7T0	LLM class flavin-dependent oxidoreductase OS=Escherichia coli (strain B / BL21-DE3) OX=469008 GN=ECBD_0580 PE=4 SV=1	FALSE	TRUE	FALSE	35.5224	8	13	7	2.57464e+08	17.07
High	A0A140NFF1	Coproporphyrinogen-III oxidase OS=Escherichia coli (strain B / BL21-DE3) OX=469008 GN=hemN PE=3 SV=1	FALSE	TRUE	FALSE	21.0066	7	8	7	1.40782e+08	10.71
High	A0A140NFE6	5'-methylthioadenosine/S-adenosylhomocysteine nucleosidase OS=Escherichia coli (strain B / BL21-DE3) OX=469008 GN=mtnN PE=3 SV=1	FALSE	TRUE	FALSE	43.9655	5	9	5	3.73464e+08	22.41
High	A0A140N1Q5	Small heat shock protein IbpA OS=Escherichia coli (strain B / BL21-DE3) OX=469008 GN=ibpA PE=3 SV=1	FALSE	TRUE	FALSE	56.2044	6	10	6	7.69855e+08	15.35
High	A0A140NHF3	Sec-independent protein translocase protein TatA OS=Escherichia coli (strain B / BL21-DE3) OX=469008 GN=tatA PE=3 SV=1	FALSE	TRUE	FALSE	46.0674	3	10	3	6.80292e+07	11.2
High	A0A140N2F9	Oxidoreductase OS=Escherichia coli (strain B / BL21-DE3) OX=469008 GN=ECBD_0302 PE=4 SV=1	FALSE	TRUE	FALSE	33.913	10	11	10	341159804	14.85
High	A0A140N964	tRNA pseudouridine synthase D OS=Escherichia coli (strain B / BL21-DE3) OX=469008 GN=truD PE=3 SV=1	FALSE	TRUE	FALSE	26.361	7	8	7	1.55986e+08	11.83
High	A0A140N7H9	Pyridoxine 5'-phosphate synthase OS=Escherichia coli (strain B / BL21-DE3) OX=469008 GN=pdxJ PE=3 SV=1	FALSE	TRUE	FALSE	41.1523	6	8	6	2.09227e+08	13.09
High	A0A140N8H2	Nucleoid-associated protein YejK OS=Escherichia coli (strain B / BL21-DE3) OX=469008 GN=yejK PE=3 SV=1	FALSE	TRUE	FALSE	30.1493	6	7	6	2.75099e+08	15.78
High	A0A140N779	Undecaprenyl-phosphate 4-deoxy-4-formamido-L-arabinose transferase OS=Escherichia coli (strain B / BL21-DE3) OX=469008 GN=arnC PE=3 SV=1	FALSE	TRUE	FALSE	21.7391	7	10	7	2.40373e+08	11.63
High	A0A140NFA1	Envelope stress response regulator transcription factor CpxR OS=Escherichia coli (strain B / BL21-DE3) OX=469008 GN=cpxR PE=4 SV=1	FALSE	TRUE	FALSE	29.3103	5	11	5	2.63046e+08	11.96
High	A0A140NAK1	HTH-type transcriptional regulator CysB OS=Escherichia coli (strain B / BL21-DE3) OX=469008 GN=cysB PE=3 SV=1	FALSE	TRUE	FALSE	29.0123	7	10	7	8.40699e+07	8.12
High	A0A140N4K8	Nitrogen regulatory protein P-II OS=Escherichia coli (strain B / BL21-DE3) OX=469008 GN=glnB PE=3 SV=1	FALSE	TRUE	FALSE	52.6786	8	11	7	3.95166e+08	16.07
High	A0A140N613	YicC domain protein OS=Escherichia coli (strain B / BL21-DE3) OX=469008 GN=ECBD_0082 PE=4 SV=1	FALSE	TRUE	FALSE	35.5401	8	11	8	430891310	16.83
High	A0A140NBS2	2-iminobutanoate/2-iminopropanoate deaminase OS=Escherichia coli (strain B / BL21-DE3) OX=469008 GN=ridA PE=3 SV=1	FALSE	TRUE	FALSE	50	6	10	6	3.31505e+08	18.08
High	A0A140N4L0	50S ribosomal protein L18 OS=Escherichia coli (strain B / BL21-DE3) OX=469008 GN=rplR PE=3 SV=1	FALSE	TRUE	FALSE	45.2991	5	17	5	3.31528e+08	38.77
High	A0A140NB69	Integration host factor subunit alpha OS=Escherichia coli (strain B / BL21-DE3) OX=469008 GN=ihfA PE=3 SV=1	FALSE	TRUE	FALSE	48.4848	6	10	6	3.41475e+08	18.59
High	A0A140NEG9	Acetylglutamate kinase OS=Escherichia coli (strain B / BL21-DE3) OX=469008 GN=argB PE=1 SV=1	FALSE	TRUE	FALSE	35.2713	6	9	6	4.24843e+08	12.58
High	A0A140NEX7	Galactofuranose ABC transporter substrate-binding protein YtfQ OS=Escherichia coli (strain B / BL21-DE3) OX=469008 GN=ytfQ PE=4 SV=1	FALSE	TRUE	FALSE	31.1321	8	12	8	6.87073e+08	15.83
High	A0A140N7E7	Bifunctional chorismate mutase/prephenate dehydratase OS=Escherichia coli (strain B / BL21-DE3) OX=469008 GN=pheA PE=4 SV=1	FALSE	TRUE	FALSE	19.171	6	7	6	5.5397e+07	8.47
High	A0A140NFJ8	ABC transporter ATP-binding protein OS=Escherichia coli (strain B / BL21-DE3) OX=469008 GN=ECBD_3492 PE=4 SV=1	FALSE	TRUE	FALSE	20.7792	5	6	5	2.29173e+08	7.17
High	A0A140N610	OB fold stress tolerance protein YgiW OS=Escherichia coli (strain B / BL21-DE3) OX=469008 GN=ygiW PE=4 SV=1	FALSE	TRUE	FALSE	49.2308	6	14	6	1.10109e+09	17.9
High	A0A140N3P1	Pyridoxal phosphate homeostasis protein OS=Escherichia coli (strain B / BL21-DE3) OX=469008 GN=yggS PE=3 SV=1	FALSE	TRUE	FALSE	33.7607	5	8	5	7.24587e+07	13.67
High	A0A140N6E7	Peptide chain release factor 2 OS=Escherichia coli (strain B / BL21-DE3) OX=469008 GN=prfB PE=3 SV=1	FALSE	TRUE	FALSE	21.0959	5	7	5	1.86583e+08	15.47
High	A0A140N649	Aldehyde dehydrogenase (NAD(+)) OS=Escherichia coli (strain B / BL21-DE3) OX=469008 GN=aldB PE=3 SV=1	FALSE	TRUE	FALSE	27.7344	8	10	8	3.65501e+08	12.48
High	A0A140N6R6	Glyoxylate/hydroxypyruvate reductase B OS=Escherichia coli (strain B / BL21-DE3) OX=469008 GN=ghrB PE=3 SV=1	FALSE	TRUE	FALSE	30.8642	6	8	6	4.25902e+08	14.69
High	A0A140NAW6	Glucose-1-phosphate thymidylyltransferase OS=Escherichia coli (strain B / BL21-DE3) OX=469008 GN=rfbA PE=3 SV=1	FALSE	TRUE	FALSE	35.274	8	11	8	1.8183e+08	20.89
High	A0A140N942	GTPase Der OS=Escherichia coli (strain B / BL21-DE3) OX=469008 GN=der PE=3 SV=1	FALSE	TRUE	FALSE	23.4694	9	13	9	1.30919e+08	15.36
High	A0A140NAU7	Ribosome-recycling factor OS=Escherichia coli (strain B / BL21-DE3) OX=469008 GN=frr PE=3 SV=1	FALSE	TRUE	FALSE	52.973	8	10	8	7.42232e+08	17.15
High	A0A140NEM4	Superoxide dismutase OS=Escherichia coli (strain B / BL21-DE3) OX=469008 GN=sodA PE=3 SV=1	FALSE	TRUE	FALSE	49.0291	8	11	8	5.64715e+08	11.48
High	A0A140N788	Glutamate synthase subunit GltD OS=Escherichia coli (strain B / BL21-DE3) OX=469008 GN=gltD PE=4 SV=1	FALSE	TRUE	FALSE	25.8475	7	8	7	1.30933e+08	11.96
High	A0A140N7Z8	Dihydropteroate synthase OS=Escherichia coli (strain B / BL21-DE3) OX=469008 GN=folP PE=3 SV=1	FALSE	TRUE	FALSE	38.6525	8	8	8	1.21246e+08	16.48
High	A0A140N9S7	Anaerobic glycerol-3-phosphate dehydrogenase subunit B OS=Escherichia coli (strain B / BL21-DE3) OX=469008 GN=glpB PE=3 SV=1	FALSE	TRUE	FALSE	25.0597	6	10	6	4.39386e+08	15.74
High	A0A140N797	Ribosome hibernation promoting factor OS=Escherichia coli (strain B / BL21-DE3) OX=469008 GN=hpf PE=4 SV=1	FALSE	TRUE	FALSE	84.2105	4	8	4	2.41071e+08	11.52
High	A0A140NDR7	UDP-N-acetylmuramate--L-alanyl-gamma-D-glutamyl-meso-2,6-diaminoheptandioate ligase OS=Escherichia coli (strain B / BL21-DE3) OX=469008 GN=mpl PE=3 SV=1	FALSE	TRUE	FALSE	23.6324	6	7	6	1.99957e+08	7.03
High	A0A140NE48	Isoaspartyl dipeptidase OS=Escherichia coli (strain B / BL21-DE3) OX=469008 GN=iadA PE=3 SV=1	FALSE	TRUE	FALSE	29.7436	7	8	7	1.47378e+08	17.87
High	A0A140N843	FAD-dependent 2-octaprenylphenol hydroxylase OS=Escherichia coli (strain B / BL21-DE3) OX=469008 GN=ubiI PE=3 SV=1	FALSE	TRUE	FALSE	31	8	8	8	132106217	14.93
High	A0A140NDJ4	Ribosomal protein S12 methylthiotransferase RimO OS=Escherichia coli (strain B / BL21-DE3) OX=469008 GN=rimO PE=3 SV=1	FALSE	TRUE	FALSE	16.3265	5	7	5	1.78012e+08	12.53
High	A0A140N8N1	Efflux pump membrane protein OS=Escherichia coli (strain B / BL21-DE3) OX=469008 GN=emrA PE=3 SV=1	FALSE	TRUE	FALSE	23.5897	9	9	9	8.84953e+07	9.88
High	A0A140NFG9	3-octaprenyl-4-hydroxybenzoate carboxy-lyase OS=Escherichia coli (strain B / BL21-DE3) OX=469008 GN=ubiD PE=3 SV=1	FALSE	TRUE	FALSE	22.9376	6	8	6	1.07007e+08	16.62
High	A0A140N7Y1	DUF883 domain-containing protein OS=Escherichia coli (strain B / BL21-DE3) OX=469008 GN=ECBD_0641 PE=3 SV=1	FALSE	TRUE	FALSE	58.4158	4	10	4	9.38221e+08	16.52
High	A0A140NG09	Threonine synthase OS=Escherichia coli (strain B / BL21-DE3) OX=469008 GN=thrC PE=3 SV=1	FALSE	TRUE	FALSE	19.8598	6	7	6	1.33137e+08	6.7
High	A0A140NAC7	UDP-glucose 6-dehydrogenase OS=Escherichia coli (strain B / BL21-DE3) OX=469008 GN=ugd PE=3 SV=1	FALSE	TRUE	FALSE	28.6082	8	11	8	2.5396e+08	16.71
High	A0A140N9M9	1,4-dihydroxy-2-naphthoyl-CoA synthase OS=Escherichia coli (strain B / BL21-DE3) OX=469008 GN=menB PE=3 SV=1	FALSE	TRUE	FALSE	35.4386	8	8	8	3.69091e+08	15.88
High	A0A140N9T6	Ubiquinone biosynthesis O-methyltransferase OS=Escherichia coli (strain B / BL21-DE3) OX=469008 GN=ubiG PE=3 SV=1	FALSE	TRUE	FALSE	57.0833	7	8	7	2.01263e+08	11.45
High	A0A140N5A9	Fe/S biogenesis protein NfuA OS=Escherichia coli (strain B / BL21-DE3) OX=469008 GN=nfuA PE=3 SV=1	FALSE	TRUE	FALSE	21.9895	3	7	3	5.59268e+08	10.54
High	A0A140NDS7	Peptide methionine sulfoxide reductase MsrA OS=Escherichia coli (strain B / BL21-DE3) OX=469008 GN=msrA PE=3 SV=1	FALSE	TRUE	FALSE	51.4151	7	11	7	6.12867e+08	14.77
High	A0A140NDN8	Catabolite repressor/activator OS=Escherichia coli (strain B / BL21-DE3) OX=469008 GN=cra PE=4 SV=1	FALSE	TRUE	FALSE	36.5269	9	10	9	1.35963e+08	13.82
High	A0A140N3M3	Metalloprotease TldD OS=Escherichia coli (strain B / BL21-DE3) OX=469008 GN=tldD PE=3 SV=1	FALSE	TRUE	FALSE	19.5426	5	5	5	182747076	13.51
High	A0A140NAS5	Leucine-responsive transcriptional regulator Lrp OS=Escherichia coli (strain B / BL21-DE3) OX=469008 GN=lrp PE=4 SV=1	FALSE	TRUE	FALSE	53.6585	9	13	9	8.56071e+08	12.91
High	A0A140N7A7	Mammalian cell entry related domain protein OS=Escherichia coli (strain B / BL21-DE3) OX=469008 GN=mlaD PE=4 SV=1	FALSE	TRUE	FALSE	43.7158	6	8	6	4.56409e+08	11.24
High	A0A140N8C8	SH3 domain protein OS=Escherichia coli (strain B / BL21-DE3) OX=469008 GN=ECBD_0686 PE=4 SV=1	FALSE	TRUE	FALSE	33.9806	7	7	7	1.44323e+08	9.93
High	A0A140N7A0	Ribonucleoside-diphosphate reductase OS=Escherichia coli (strain B / BL21-DE3) OX=469008 GN=nrdB PE=3 SV=1	FALSE	TRUE	FALSE	25.5319	8	9	8	2.3862e+08	12.32
High	A0A140N849	Aspartate-semialdehyde dehydrogenase OS=Escherichia coli (strain B / BL21-DE3) OX=469008 GN=ECBD_1340 PE=4 SV=1	FALSE	TRUE	FALSE	37.9822	7	10	7	4.73409e+08	20.37
High	A0A140NDI3	2-hydroxyacyl-CoA dehydratase subunit D OS=Escherichia coli (strain B / BL21-DE3) OX=469008 GN=ECBD_3695 PE=3 SV=1	FALSE	TRUE	FALSE	21.671	6	8	6	1.49574e+08	12.55
High	A0A140NBE6	Low-specificity L-threonine aldolase OS=Escherichia coli (strain B / BL21-DE3) OX=469008 GN=ltaE PE=3 SV=1	FALSE	TRUE	FALSE	22.8228	7	9	7	2.27053e+08	13.23
High	A0A140NAF7	Formyltetrahydrofolate deformylase OS=Escherichia coli (strain B / BL21-DE3) OX=469008 GN=purU PE=3 SV=1	FALSE	TRUE	FALSE	20.3571	5	6	5	3.61191e+08	8.02
High	A0A140N9Z5	Cell division protein ZipA OS=Escherichia coli (strain B / BL21-DE3) OX=469008 GN=zipA PE=3 SV=1	FALSE	TRUE	FALSE	19.2073	4	8	4	3.48197e+07	9.29
High	A0A140NEF5	Bifunctional protein FolD OS=Escherichia coli (strain B / BL21-DE3) OX=469008 GN=folD PE=3 SV=1	FALSE	TRUE	FALSE	19.7917	4	7	4	2.3842e+08	9.8
High	A0A140NBN1	Bifunctional NADP-dependent 3-hydroxy acid dehydrogenase/3-hydroxypropionate dehydrogenase YdfG OS=Escherichia coli (strain B / BL21-DE3) OX=469008 GN=ydfG PE=3 SV=1	FALSE	TRUE	FALSE	29.0323	4	6	4	1.23043e+09	12.08
High	A0A140N417	G/U mismatch-specific DNA glycosylase OS=Escherichia coli (strain B / BL21-DE3) OX=469008 GN=mug PE=3 SV=1	FALSE	TRUE	FALSE	57.1429	8	10	8	1.78333e+08	12.69
High	A0A140NBM8	Aldo/keto reductase OS=Escherichia coli (strain B / BL21-DE3) OX=469008 GN=ECBD_1996 PE=4 SV=1	FALSE	TRUE	FALSE	22.4832	5	8	5	5.26329e+08	12.75
High	A0A140N7Z4	Cobalamin synthesis protein P47K OS=Escherichia coli (strain B / BL21-DE3) OX=469008 GN=yeiR PE=3 SV=1	FALSE	TRUE	FALSE	25.3049	7	8	7	1.87887e+07	11.6
High	A0A140N7S8	Peptidase S49 domain protein OS=Escherichia coli (strain B / BL21-DE3) OX=469008 GN=sohB PE=3 SV=1	FALSE	TRUE	FALSE	30.086	6	7	6	1.55881e+08	10.23
High	A0A140N622	Galactarate dehydratase (L-threo-forming) OS=Escherichia coli (strain B / BL21-DE3) OX=469008 GN=garD PE=3 SV=1	FALSE	TRUE	FALSE	18.3556	6	8	6	2.59706e+08	12.19
High	A0A140NAH1	DsrE family protein OS=Escherichia coli (strain B / BL21-DE3) OX=469008 GN=ychN PE=4 SV=1	FALSE	TRUE	FALSE	51.2821	4	8	4	6.79149e+08	13.69
High	A0A140N822	Cytidine deaminase OS=Escherichia coli (strain B / BL21-DE3) OX=469008 GN=cdd PE=3 SV=1	FALSE	TRUE	FALSE	32.3129	6	7	6	1.57479e+08	16.82
High	A0A140N9I5	Dihydroneopterin aldolase OS=Escherichia coli (strain B / BL21-DE3) OX=469008 GN=folX PE=4 SV=1	FALSE	TRUE	FALSE	45	4	7	4	2.20171e+08	12.99
High	A0A140N4F0	Beta sliding clamp OS=Escherichia coli (strain B / BL21-DE3) OX=469008 GN=dnaN PE=3 SV=1	FALSE	TRUE	FALSE	17.7596	6	9	6	1.98565e+08	12.48
High	A0A140NGW9	Aspartate carbamoyltransferase OS=Escherichia coli (strain B / BL21-DE3) OX=469008 GN=pyrB PE=3 SV=1	FALSE	TRUE	FALSE	41.4791	8	11	8	3.57382e+08	16.79
High	A0A140NH47	N-acetyl-gamma-glutamyl-phosphate reductase OS=Escherichia coli (strain B / BL21-DE3) OX=469008 GN=argC PE=3 SV=1	FALSE	TRUE	FALSE	35.9281	7	7	7	5.6546e+08	13.63
High	A0A140NCR3	Protein FdhE OS=Escherichia coli (strain B / BL21-DE3) OX=469008 GN=fdhE PE=3 SV=1	FALSE	TRUE	FALSE	32.3625	6	7	6	8.94264e+07	7.21
High	A0A140NFS6	UDP-N-acetylmuramoyl-tripeptide--D-alanyl-D-alanine ligase OS=Escherichia coli (strain B / BL21-DE3) OX=469008 GN=murF PE=3 SV=1	FALSE	TRUE	FALSE	17.0354	5	7	5	2.4045e+08	15.24
High	A0A140NEF0	Bor family protein OS=Escherichia coli (strain B / BL21-DE3) OX=469008 GN=iss PE=4 SV=1	FALSE	TRUE	FALSE	32.9897	3	8	2	1.54087e+09	16.8
High	A0A140NF10	Dihydroxy-acid dehydratase OS=Escherichia coli (strain B / BL21-DE3) OX=469008 GN=ilvD PE=3 SV=1	FALSE	TRUE	FALSE	18.3442	7	8	7	9.46361e+07	14.94
High	A0A140N7U0	Divisome-associated lipoprotein YraP OS=Escherichia coli (strain B / BL21-DE3) OX=469008 GN=yraP PE=4 SV=1	FALSE	TRUE	FALSE	46.0733	6	7	6	7.36585e+08	10.02
High	A0A140NBC1	HTH-type transcriptional repressor PurR OS=Escherichia coli (strain B / BL21-DE3) OX=469008 GN=purR PE=3 SV=1	FALSE	TRUE	FALSE	25.5132	7	9	7	9.47932e+07	11.25
High	A0A140N4G2	Protein-export protein SecB OS=Escherichia coli (strain B / BL21-DE3) OX=469008 GN=secB PE=3 SV=1	FALSE	TRUE	FALSE	45.1613	6	11	6	7.44313e+08	15.66
High	A0A140N9E9	PTS mannose transporter subunit IID OS=Escherichia coli (strain B / BL21-DE3) OX=469008 GN=manZ PE=4 SV=1	FALSE	TRUE	FALSE	30.0353	8	9	8	1.12199e+09	14.29
High	A0A140N6F4	Flavohemoprotein OS=Escherichia coli (strain B / BL21-DE3) OX=469008 GN=hmp PE=3 SV=1	FALSE	TRUE	FALSE	27.0202	7	8	7	9.26123e+07	14.41
High	A0A140NAI0	Peptide chain release factor 1 OS=Escherichia coli (strain B / BL21-DE3) OX=469008 GN=prfA PE=3 SV=1	FALSE	TRUE	FALSE	21.9444	5	7	5	1.77226e+08	11.71
High	A0A140NFC6	UPF0234 protein YajQ OS=Escherichia coli (strain B / BL21-DE3) OX=469008 GN=yajQ PE=3 SV=1	FALSE	TRUE	FALSE	43.5583	8	11	8	1.27115e+09	12.18
High	A0A140N6H9	tRNA (cytidine/uridine-2'-O-)-methyltransferase TrmJ OS=Escherichia coli (strain B / BL21-DE3) OX=469008 GN=trmJ PE=3 SV=1	FALSE	TRUE	FALSE	35.3659	6	9	6	2.0008e+08	6.24
High	A0A140NBE2	N-methyl-L-tryptophan oxidase OS=Escherichia coli (strain B / BL21-DE3) OX=469008 GN=solA PE=3 SV=1	FALSE	TRUE	FALSE	15.5914	5	6	5	8.72818e+07	9.92
High	A0A140NGH9	Deoxyribose-phosphate aldolase OS=Escherichia coli (strain B / BL21-DE3) OX=469008 GN=deoC PE=3 SV=1	FALSE	TRUE	FALSE	28.9575	5	6	5	4.21966e+08	9.92
High	A0A140NBX3	Peptidyl-dipeptidase Dcp OS=Escherichia coli (strain B / BL21-DE3) OX=469008 GN=ECBD_2101 PE=3 SV=1	FALSE	TRUE	FALSE	8.3926	4	5	4	1.25786e+08	13.37
High	A0A140NEK7	Inosine kinase OS=Escherichia coli (strain B / BL21-DE3) OX=469008 GN=gsk PE=4 SV=1	FALSE	TRUE	FALSE	21.8894	5	5	5	7.55992e+07	9.31
High	A0A140NF80	Nucleoid-associated protein YbaB OS=Escherichia coli (strain B / BL21-DE3) OX=469008 GN=ybaB PE=3 SV=1	FALSE	TRUE	FALSE	32.1101	2	16	2	2.29283e+07	34.19
High	A0A140N2B1	Glutathione-disulfide reductase OS=Escherichia coli (strain B / BL21-DE3) OX=469008 GN=gorA PE=3 SV=1	FALSE	TRUE	FALSE	33.1111	8	9	8	3.319e+08	18.48
High	A0A140NBE4	Tol-Pal system protein TolQ OS=Escherichia coli (strain B / BL21-DE3) OX=469008 GN=tolQ PE=3 SV=1	FALSE	TRUE	FALSE	45.2174	5	8	5	1.29472e+08	14.81
High	A0A140NB18	Curved DNA-binding protein OS=Escherichia coli (strain B / BL21-DE3) OX=469008 GN=cbpA PE=3 SV=1	FALSE	TRUE	FALSE	45.098	8	9	8	1.60018e+08	13.99
High	A0A140NCV1	Uridylate kinase OS=Escherichia coli (strain B / BL21-DE3) OX=469008 GN=pyrH PE=3 SV=1	FALSE	TRUE	FALSE	31.9502	5	9	5	4.17652e+08	16.82
High	A0A140N8K8	Sua5/YciO/YrdC/YwlC family protein OS=Escherichia coli (strain B / BL21-DE3) OX=469008 GN=ECBD_2356 PE=4 SV=1	FALSE	TRUE	FALSE	40.2913	5	7	5	3.67487e+08	7.07
High	A0A140NFX6	Membrane protein insertase YidC OS=Escherichia coli (strain B / BL21-DE3) OX=469008 GN=yidC PE=3 SV=1	FALSE	TRUE	FALSE	20.073	6	8	6	3.13296e+08	10.85
High	A0A140NFE9	Chaperone protein Skp OS=Escherichia coli (strain B / BL21-DE3) OX=469008 GN=skp PE=3 SV=1	FALSE	TRUE	FALSE	23.6025	4	12	4	1.70205e+09	20.69
High	A0A140ND59	Aspartate--ammonia ligase OS=Escherichia coli (strain B / BL21-DE3) OX=469008 GN=asnA PE=3 SV=1	FALSE	TRUE	FALSE	29.3939	6	6	6	3.61407e+08	8.72
High	A0A140NAC2	Galactose/methyl galactoside import ATP-binding protein MglA OS=Escherichia coli (strain B / BL21-DE3) OX=469008 GN=mglA PE=3 SV=1	FALSE	TRUE	FALSE	16.4032	7	7	7	4.31286e+07	9.99
High	A0A140NAY7	Glycoprotein/polysaccharide metabolism OS=Escherichia coli (strain B / BL21-DE3) OX=469008 GN=ECBD_3202 PE=4 SV=1	FALSE	TRUE	FALSE	36.8421	4	8	4	3.47838e+08	17.4
High	A0A140NGD5	4-hydroxy-3-methylbut-2-enyl diphosphate reductase OS=Escherichia coli (strain B / BL21-DE3) OX=469008 GN=ispH PE=3 SV=1	FALSE	TRUE	FALSE	29.4304	5	7	5	1.45423e+08	10.88
High	A0A140N472	Protein-L-isoaspartate O-methyltransferase OS=Escherichia coli (strain B / BL21-DE3) OX=469008 GN=pcm PE=3 SV=1	FALSE	TRUE	FALSE	26.4423	3	5	3	1.51688e+08	10.43
High	A0A140NB42	UPF0194 membrane protein YbhG OS=Escherichia coli (strain B / BL21-DE3) OX=469008 GN=ybhG PE=3 SV=1	FALSE	TRUE	FALSE	32.3263	6	7	6	3.08109e+08	6.33
High	A0A140NB73	Trehalose-6-phosphate synthase OS=Escherichia coli (strain B / BL21-DE3) OX=469008 GN=otsA PE=3 SV=1	FALSE	TRUE	FALSE	29.3249	8	8	8	1.50721e+08	9.06
High	A0A140NCE2	Pyrroline-5-carboxylate reductase OS=Escherichia coli (strain B / BL21-DE3) OX=469008 GN=proC PE=3 SV=1	FALSE	TRUE	FALSE	18.5874	5	6	5	1.38889e+08	13.57
High	A0A140N683	RNA polymerase sigma factor RpoD OS=Escherichia coli (strain B / BL21-DE3) OX=469008 GN=rpoD PE=3 SV=1	FALSE	TRUE	FALSE	13.54	7	11	6	1.14161e+08	14.42
High	A0A140N848	5-keto-4-deoxy-D-glucarate aldolase OS=Escherichia coli (strain B / BL21-DE3) OX=469008 GN=garL PE=3 SV=1	FALSE	TRUE	FALSE	19.1406	4	7	4	1.47604e+08	12.89
High	A0A140N8M5	Murein tripeptide/oligopeptide ABC transporter ATP binding protein OppD OS=Escherichia coli (strain B / BL21-DE3) OX=469008 GN=oppD PE=4 SV=1	FALSE	TRUE	FALSE	21.365	5	6	5	1.11147e+08	7.64
High	A0A140NC83	Transcriptional regulatory protein TyrR OS=Escherichia coli (strain B / BL21-DE3) OX=469008 GN=tyrR PE=4 SV=1	FALSE	TRUE	FALSE	15.2047	6	7	6	7.77149e+07	15.17
High	A0A140N9T5	NAD-dependent malic enzyme OS=Escherichia coli (strain B / BL21-DE3) OX=469008 GN=maeA PE=3 SV=1	FALSE	TRUE	FALSE	19.292	8	8	8	1.81222e+08	9.41
High	A0A140NE87	Single-stranded DNA-binding protein OS=Escherichia coli (strain B / BL21-DE3) OX=469008 GN=ssb1 PE=3 SV=1	FALSE	TRUE	FALSE	30.8989	5	10	5	1.02618e+09	14.73
High	A0A140NEL9	Glutaminase OS=Escherichia coli (strain B / BL21-DE3) OX=469008 GN=glsA PE=3 SV=1	FALSE	TRUE	FALSE	19.0323	3	4	3	3.17294e+08	13.4
High	A0A140N8F2	7-carboxy-7-deazaguanine synthase OS=Escherichia coli (strain B / BL21-DE3) OX=469008 GN=queE PE=3 SV=1	FALSE	TRUE	FALSE	26.9058	4	5	4	53017083	10.68
High	A0A140N7N3	Glutamate synthase (Ferredoxin) OS=Escherichia coli (strain B / BL21-DE3) OX=469008 GN=ECBD_0530 PE=3 SV=1	FALSE	TRUE	FALSE	6.92156	7	7	7	5.26703e+07	9.15
High	A0A140NEQ9	Two component transcriptional regulator, winged helix family OS=Escherichia coli (strain B / BL21-DE3) OX=469008 GN=basR PE=4 SV=1	FALSE	TRUE	FALSE	25.2252	5	8	5	3.62544e+08	14.46
High	A0A140N7K1	Monooxygenase OS=Escherichia coli (strain B / BL21-DE3) OX=469008 GN=ECBD_1978 PE=4 SV=1	FALSE	TRUE	FALSE	47.5248	5	8	5	1.11253e+09	7.6
High	A0A140NA64	D-tagatose-1,6-bisphosphate aldolase subunit GatY OS=Escherichia coli (strain B / BL21-DE3) OX=469008 GN=gatY PE=3 SV=1	FALSE	TRUE	FALSE	41.6084	6	8	6	1.27367e+08	13.41
High	A0A140N8F4	Probable phosphatase YcdX OS=Escherichia coli (strain B / BL21-DE3) OX=469008 GN=ycdX PE=3 SV=1	FALSE	TRUE	FALSE	32.6531	6	6	6	1.21055e+08	10.62
High	A0A140NEB2	4-hydroxy-tetrahydrodipicolinate reductase OS=Escherichia coli (strain B / BL21-DE3) OX=469008 GN=dapB PE=3 SV=1	FALSE	TRUE	FALSE	27.1062	4	5	4	2.09576e+08	6.95
High	A0A140N500	Multidrug efflux transporter EmrAB transcriptional repressor EmrR OS=Escherichia coli (strain B / BL21-DE3) OX=469008 GN=emrR PE=4 SV=1	FALSE	TRUE	FALSE	40.3409	5	10	5	3.16604e+08	12.09
High	A0A140N6F9	YegP family protein OS=Escherichia coli (strain B / BL21-DE3) OX=469008 GN=ECBD_1573 PE=3 SV=1	FALSE	TRUE	FALSE	31.8182	2	6	2	3.68039e+08	11.92
High	A0A140N3L9	50S ribosomal protein L28 OS=Escherichia coli (strain B / BL21-DE3) OX=469008 GN=rpmB PE=3 SV=1	FALSE	TRUE	FALSE	61.5385	8	12	7	3.3447e+09	10.67
High	A0A140N1P7	Cof-like hydrolase OS=Escherichia coli (strain B / BL21-DE3) OX=469008 GN=yidA PE=4 SV=1	FALSE	TRUE	FALSE	33.3333	6	7	6	1.26485e+08	12.58
High	A0A140NDY4	Guanosine-5'-triphosphate,3'-diphosphate pyrophosphatase OS=Escherichia coli (strain B / BL21-DE3) OX=469008 GN=gppA PE=3 SV=1	FALSE	TRUE	FALSE	17.2065	6	6	6	9.75189e+07	10.55
High	A0A140NEC0	Aspartokinase OS=Escherichia coli (strain B / BL21-DE3) OX=469008 GN=lysC PE=3 SV=1	FALSE	TRUE	FALSE	23.8307	7	8	7	1.36168e+08	9.8
High	A0A140N5X0	UDP-N-acetylglucosamine 1-carboxyvinyltransferase OS=Escherichia coli (strain B / BL21-DE3) OX=469008 GN=murA PE=3 SV=1	FALSE	TRUE	FALSE	16.7064	5	7	5	1.98319e+08	9.63
High	A0A140NBJ1	Uncharacterized protein OS=Escherichia coli (strain B / BL21-DE3) OX=469008 GN=ECBD_2591 PE=4 SV=1	FALSE	TRUE	FALSE	77.3333	5	6	5	3.39074e+08	11.91
High	A0A140NA34	Anaerobic glycerol-3-phosphate dehydrogenase subunit C OS=Escherichia coli (strain B / BL21-DE3) OX=469008 GN=glpC PE=4 SV=1	FALSE	TRUE	FALSE	27.7778	7	9	7	3.73103e+08	13.56
High	A0A140NHR4	DUF406 domain-containing protein OS=Escherichia coli (strain B / BL21-DE3) OX=469008 GN=ECBD_4102 PE=3 SV=1	FALSE	TRUE	FALSE	52.5253	4	10	4	9.11659e+07	19.39
High	A0A140NIC8	tRNA modification GTPase MnmE OS=Escherichia coli (strain B / BL21-DE3) OX=469008 GN=mnmE PE=3 SV=1	FALSE	TRUE	FALSE	16.0793	5	9	5	1.25841e+08	8.44
High	A0A140NC02	Small ribosomal subunit biogenesis GTPase RsgA OS=Escherichia coli (strain B / BL21-DE3) OX=469008 GN=rsgA PE=3 SV=1	FALSE	TRUE	FALSE	15.4286	3	4	3	1.03405e+08	8.27
High	A0A140NCS6	Ubiquinol oxidase subunit 2 OS=Escherichia coli (strain B / BL21-DE3) OX=469008 GN=cyoA PE=3 SV=1	FALSE	TRUE	FALSE	33.0159	5	8	5	5.23518e+08	9.93
High	A0A140N8R1	Two component transcriptional regulator, winged helix family OS=Escherichia coli (strain B / BL21-DE3) OX=469008 GN=baeR PE=4 SV=1	FALSE	TRUE	FALSE	30	5	5	5	101339431	9.85
High	A0A140N998	Ribonuclease 3 OS=Escherichia coli (strain B / BL21-DE3) OX=469008 GN=rnc PE=3 SV=1	FALSE	TRUE	FALSE	32.3009	5	7	5	1.29165e+08	7.15
High	A0A140NDR0	Membrane integrity-associated transporter subunit PqiC OS=Escherichia coli (strain B / BL21-DE3) OX=469008 GN=pqiC PE=4 SV=1	FALSE	TRUE	FALSE	47.5936	5	5	5	199850837	9.28
High	A0A140N6W2	Anhydro-N-acetylmuramic acid kinase OS=Escherichia coli (strain B / BL21-DE3) OX=469008 GN=anmK PE=3 SV=1	FALSE	TRUE	FALSE	26.2873	6	8	6	1.32681e+08	7.44
High	A0A140NAT6	Phosphogluconate dehydratase OS=Escherichia coli (strain B / BL21-DE3) OX=469008 GN=edd PE=3 SV=1	FALSE	TRUE	FALSE	17.2471	5	5	5	4.57021e+07	10.08
High	A0A140N3Y7	Aldo/keto reductase OS=Escherichia coli (strain B / BL21-DE3) OX=469008 GN=ECBD_0890 PE=4 SV=1	FALSE	TRUE	FALSE	23.4104	6	8	6	3.59029e+08	11.84
High	A0A140N9N9	Osmotically-inducible lipoprotein OsmE OS=Escherichia coli (strain B / BL21-DE3) OX=469008 GN=osmE PE=4 SV=1	FALSE	TRUE	FALSE	37.5	4	8	4	1.19274e+08	11.85
High	A0A140N9U2	Short-chain dehydrogenase/reductase SDR OS=Escherichia coli (strain B / BL21-DE3) OX=469008 GN=ECBD_2351 PE=4 SV=1	FALSE	TRUE	FALSE	40.4762	6	7	6	1.784e+08	8.79
High	A0A140NC00	Oxidoreductase OS=Escherichia coli (strain B / BL21-DE3) OX=469008 GN=ECBD_2021 PE=4 SV=1	FALSE	TRUE	FALSE	22.5434	5	6	5	9.48965e+07	13
High	A0A140N2D9	Chromosomal replication initiator protein DnaA OS=Escherichia coli (strain B / BL21-DE3) OX=469008 GN=dnaA PE=3 SV=1	FALSE	TRUE	FALSE	21.8415	7	8	7	1.32273e+08	14.41
High	A0A140ND46	Dihydroorotase OS=Escherichia coli (strain B / BL21-DE3) OX=469008 GN=pyrC PE=3 SV=1	FALSE	TRUE	FALSE	28.7356	6	7	6	1.92906e+08	6.13
High	A0A140N6N9	4-alpha-glucanotransferase OS=Escherichia coli (strain B / BL21-DE3) OX=469008 GN=ECBD_0329 PE=3 SV=1	FALSE	TRUE	FALSE	17.147	6	6	6	1.8094e+08	11.47
High	A0A140SS65	Glutamate racemase OS=Escherichia coli (strain B / BL21-DE3) OX=469008 GN=murI PE=3 SV=1	FALSE	TRUE	FALSE	20	5	6	5	5.27427e+07	10.68
High	A0A140NBA0	Probable transcriptional regulatory protein YebC OS=Escherichia coli (strain B / BL21-DE3) OX=469008 GN=yebC PE=3 SV=1	FALSE	TRUE	FALSE	24.3902	4	5	4	2.89615e+08	11.21
High	A0A140NDS1	Molybdenum cofactor biosynthesis protein B OS=Escherichia coli (strain B / BL21-DE3) OX=469008 GN=moaB PE=3 SV=1	FALSE	TRUE	FALSE	39.4118	6	8	6	1.42922e+08	16.22
High	A0A140NAV7	Cupin 4 family protein OS=Escherichia coli (strain B / BL21-DE3) OX=469008 GN=roxA PE=4 SV=1	FALSE	TRUE	FALSE	18.7668	6	9	6	1.3198e+08	12.79
High	A0A140N785	HTH-type transcriptional repressor NanR OS=Escherichia coli (strain B / BL21-DE3) OX=469008 GN=nanR PE=3 SV=1	FALSE	TRUE	FALSE	30.038	6	6	6	5.92558e+07	12
High	A0A140ND30	UDP-N-acetylmuramoylalanine--D-glutamate ligase OS=Escherichia coli (strain B / BL21-DE3) OX=469008 GN=murD PE=3 SV=1	FALSE	TRUE	FALSE	16.21	4	6	4	2.6384e+08	14.28
High	A0A140N7W3	UPF0265 protein YeeX OS=Escherichia coli (strain B / BL21-DE3) OX=469008 GN=yeeX PE=3 SV=1	FALSE	TRUE	FALSE	26.6055	2	9	2	4.37826e+08	20.48
High	A0A140N850	NAD(P)H dehydrogenase (Quinone) OS=Escherichia coli (strain B / BL21-DE3) OX=469008 GN=mdaB PE=4 SV=1	FALSE	TRUE	FALSE	31.0881	4	6	4	1.85626e+08	16
High	A0A140N420	L-fucose isomerase OS=Escherichia coli (strain B / BL21-DE3) OX=469008 GN=fucI PE=3 SV=1	FALSE	TRUE	FALSE	16.7513	6	6	6	1.06529e+08	9.08
High	A0A140NBI8	Mischarged aminoacyl-tRNA deacylase OS=Escherichia coli (strain B / BL21-DE3) OX=469008 GN=yeaK PE=4 SV=1	FALSE	TRUE	FALSE	40.7186	4	5	4	2.08418e+08	8.89
High	A0A140N903	EIICB-Glc OS=Escherichia coli (strain B / BL21-DE3) OX=469008 GN=ptsG PE=4 SV=1	FALSE	TRUE	FALSE	15.9329	6	7	6	6.50505e+07	6.53
High	A0A140NDN0	D-alanine--D-alanine ligase OS=Escherichia coli (strain B / BL21-DE3) OX=469008 GN=ddl PE=3 SV=1	FALSE	TRUE	FALSE	17.9739	4	5	4	2.51456e+08	12.35
High	A0A140NEL3	Oligoribonuclease OS=Escherichia coli (strain B / BL21-DE3) OX=469008 GN=orn PE=3 SV=1	FALSE	TRUE	FALSE	19.337	4	5	4	1.16475e+08	12.23
High	A0A140NCU2	Acyl-[acyl-carrier-protein]--UDP-N-acetylglucosamine O-acyltransferase OS=Escherichia coli (strain B / BL21-DE3) OX=469008 GN=lpxA PE=3 SV=1	FALSE	TRUE	FALSE	27.0992	4	7	4	1.98028e+08	14.67
High	A0A140NHE6	Alanine racemase OS=Escherichia coli (strain B / BL21-DE3) OX=469008 GN=alr PE=3 SV=1	FALSE	TRUE	FALSE	22.0056	6	6	6	2.78165e+07	10.34
High	A0A140NG76	UDP-N-acetylmuramate--L-alanine ligase OS=Escherichia coli (strain B / BL21-DE3) OX=469008 GN=murC PE=3 SV=1	FALSE	TRUE	FALSE	18.9409	6	8	6	1.4905e+08	15.81
High	A0A140ND09	Histidine triad (HIT) protein OS=Escherichia coli (strain B / BL21-DE3) OX=469008 GN=hinT PE=4 SV=1	FALSE	TRUE	FALSE	53.7815	3	5	3	5.9431e+08	13.48
High	A0A140N6M9	Alpha-1,4 glucan phosphorylase OS=Escherichia coli (strain B / BL21-DE3) OX=469008 GN=glgP PE=3 SV=1	FALSE	TRUE	FALSE	13.865	8	8	8	6.49568e+07	6.78
High	A0A140N9C3	Glucokinase OS=Escherichia coli (strain B / BL21-DE3) OX=469008 GN=glk PE=3 SV=1	FALSE	TRUE	FALSE	36.7601	7	7	7	9.64784e+07	7.11
High	A0A140N7X0	Arabinose 5-phosphate isomerase OS=Escherichia coli (strain B / BL21-DE3) OX=469008 GN=kdsD PE=3 SV=1	FALSE	TRUE	FALSE	21.9512	4	4	4	1.01823e+08	8.73
High	A0A140N6V1	Peptidyl-prolyl cis-trans isomerase OS=Escherichia coli (strain B / BL21-DE3) OX=469008 GN=slyD PE=3 SV=1	FALSE	TRUE	FALSE	37.2449	4	17	4	1.02546e+08	25.51
High	A0A140N340	50S ribosomal protein L27 OS=Escherichia coli (strain B / BL21-DE3) OX=469008 GN=rpmA PE=3 SV=1	FALSE	TRUE	FALSE	38.8235	4	37	4	2.94061e+08	55.14
High	A0A140N923	Iron-sulfur cluster assembly scaffold protein IscU OS=Escherichia coli (strain B / BL21-DE3) OX=469008 GN=iscU PE=3 SV=1	FALSE	TRUE	FALSE	57.0312	5	8	5	9.22985e+07	12.06
High	A0A140N9R6	Exoribonuclease 2 OS=Escherichia coli (strain B / BL21-DE3) OX=469008 GN=rnb PE=3 SV=1	FALSE	TRUE	FALSE	15.0621	6	6	6	1.26666e+08	9.81
High	A0A140NEK3	Regulator of ribonuclease activity A OS=Escherichia coli (strain B / BL21-DE3) OX=469008 GN=rraA PE=3 SV=1	FALSE	TRUE	FALSE	40.9938	5	8	5	5.70805e+08	11.12
High	A0A140NAW2	Cold-shock DNA-binding domain protein OS=Escherichia coli (strain B / BL21-DE3) OX=469008 GN=cspE PE=4 SV=1	FALSE	TRUE	FALSE	63.7681	3	13	3	7.60943e+08	30.41
High	A0A140N9Y3	HTH-type transcriptional regulator GalS OS=Escherichia coli (strain B / BL21-DE3) OX=469008 GN=galS PE=4 SV=1	FALSE	TRUE	FALSE	23.6994	8	9	8	2.64558e+08	8.59
High	A0A140NEC6	Aspartate carbamoyltransferase regulatory chain OS=Escherichia coli (strain B / BL21-DE3) OX=469008 GN=pyrI PE=3 SV=1	FALSE	TRUE	FALSE	35.2941	4	5	4	2.95903e+08	5.98
High	A0A140NBL1	HAD-superfamily hydrolase, subfamily IIA OS=Escherichia coli (strain B / BL21-DE3) OX=469008 GN=nagD PE=4 SV=1	FALSE	TRUE	FALSE	31.2	5	7	5	2.10144e+08	5.84
High	A0A140NHQ8	ATP-dependent protease subunit HslV OS=Escherichia coli (strain B / BL21-DE3) OX=469008 GN=hslV PE=2 SV=1	FALSE	TRUE	FALSE	43.1818	5	9	5	3.74566e+08	14.51
High	A0A140N6N3	Phosphoribosylaminoimidazole-succinocarboxamide synthase OS=Escherichia coli (strain B / BL21-DE3) OX=469008 GN=purC PE=3 SV=1	FALSE	TRUE	FALSE	27.8481	5	6	4	2.57331e+08	12.87
High	A0A140N6C6	Elongation factor 4 OS=Escherichia coli (strain B / BL21-DE3) OX=469008 GN=lepA PE=3 SV=1	FALSE	TRUE	FALSE	15.6928	6	7	6	1.77278e+08	8.34
High	A0A140N666	Aminotransferase class I and II OS=Escherichia coli (strain B / BL21-DE3) OX=469008 GN=avtA PE=4 SV=1	FALSE	TRUE	FALSE	12.47	4	6	4	2.00903e+08	8.84
High	A0A140N5Z7	50S ribosomal protein L33 OS=Escherichia coli (strain B / BL21-DE3) OX=469008 GN=rpmG PE=3 SV=1	FALSE	TRUE	FALSE	30.9091	2	5	2	1.76824e+09	8.44
High	A0A140NF71	Transcriptional regulator OS=Escherichia coli (strain B / BL21-DE3) OX=469008 GN=ECBD_3896 PE=4 SV=1	FALSE	TRUE	FALSE	32.9843	6	8	6	1.24772e+08	12.26
High	A0A140NDY8	Phosphatidylserine decarboxylase proenzyme OS=Escherichia coli (strain B / BL21-DE3) OX=469008 GN=psd PE=3 SV=1	FALSE	TRUE	FALSE	45.3416	7	7	7	2.27112e+08	11.4
High	A0A140N7N2	Methionyl-tRNA formyltransferase OS=Escherichia coli (strain B / BL21-DE3) OX=469008 GN=fmt PE=3 SV=1	FALSE	TRUE	FALSE	25.3968	5	6	5	1.33099e+08	7.02
High	A0A140NF62	(Fe-S)-binding protein OS=Escherichia coli (strain B / BL21-DE3) OX=469008 GN=ECBD_3351 PE=4 SV=1	FALSE	TRUE	FALSE	34.728	5	5	5	1.16293e+08	9.82
High	A0A140N856	Cationic amino acid ABC transporter, periplasmic binding protein OS=Escherichia coli (strain B / BL21-DE3) OX=469008 GN=hisJ PE=3 SV=1	FALSE	TRUE	FALSE	30.3846	5	5	5	6.05728e+08	11.89
High	A0A140NCN5	DNA polymerase III subunit gamma/tau OS=Escherichia coli (strain B / BL21-DE3) OX=469008 GN=dnaX PE=3 SV=1	FALSE	TRUE	FALSE	15.0855	6	7	6	6.77517e+07	9.18
High	A0A140N827	D-erythrose-4-phosphate dehydrogenase OS=Escherichia coli (strain B / BL21-DE3) OX=469008 GN=epd PE=3 SV=1	FALSE	TRUE	FALSE	28.3186	6	6	6	2.43951e+07	9.62
High	A0A140N7A8	Dyp-type peroxidase family OS=Escherichia coli (strain B / BL21-DE3) OX=469008 GN=yfeX PE=4 SV=1	FALSE	TRUE	FALSE	32.107	5	6	5	5.80242e+07	9.81
High	A0A140N5K0	2-octaprenyl-6-methoxyphenyl hydroxylase OS=Escherichia coli (strain B / BL21-DE3) OX=469008 GN=ubiH PE=3 SV=1	FALSE	TRUE	FALSE	31.1224	6	6	6	54027168	5.23
High	A0A140N5V3	Gfo/Idh/MocA family oxidoreductase OS=Escherichia coli (strain B / BL21-DE3) OX=469008 GN=ECBD_0655 PE=4 SV=1	FALSE	TRUE	FALSE	24.3902	6	6	6	2.34548e+08	10.31
High	A0A140NCE0	Cu(+)/Ag(+) efflux RND transporter outer membrane channel CusC OS=Escherichia coli (strain B / BL21-DE3) OX=469008 GN=cusC PE=3 SV=1	FALSE	TRUE	FALSE	14.2232	5	5	5	4.90771e+07	9.56
High	A0A140NFC3	YagU family protein OS=Escherichia coli (strain B / BL21-DE3) OX=469008 GN=ECBD_3370 PE=4 SV=1	FALSE	TRUE	FALSE	25.9804	4	8	4	3.755e+07	15.44
High	A0A140NF98	Iron-sulfur cluster-binding protein OS=Escherichia coli (strain B / BL21-DE3) OX=469008 GN=ECBD_3350 PE=4 SV=1	FALSE	TRUE	FALSE	14.9474	5	5	5	1.26348e+08	9.21
High	A0A140N9L7	DNA-binding transcriptional regulator NagC OS=Escherichia coli (strain B / BL21-DE3) OX=469008 GN=nagC PE=3 SV=1	FALSE	TRUE	FALSE	14.7783	4	5	4	1.46399e+08	7.88
High	A0A140N6M3	Gluconokinase OS=Escherichia coli (strain B / BL21-DE3) OX=469008 GN=ECBD_0306 PE=3 SV=1	FALSE	TRUE	FALSE	38.8889	3	6	3	5.45249e+08	6.17
High	A0A140N3Z1	Insulinase family protein OS=Escherichia coli (strain B / BL21-DE3) OX=469008 GN=ECBD_0212 PE=3 SV=1	FALSE	TRUE	FALSE	17.4699	4	4	4	1.12739e+08	10.56
High	A0A140N781	Arabinose 5-phosphate isomerase OS=Escherichia coli (strain B / BL21-DE3) OX=469008 GN=gutQ PE=3 SV=1	FALSE	TRUE	FALSE	19.3146	4	6	4	6.16934e+07	11.22
High	A0A140NHF7	LexA repressor OS=Escherichia coli (strain B / BL21-DE3) OX=469008 GN=lexA PE=3 SV=1	FALSE	TRUE	FALSE	36.1386	4	6	4	1.0764e+08	11.31
High	A0A140NG17	MDR efflux pump AcrAB transcriptional activator RobA OS=Escherichia coli (strain B / BL21-DE3) OX=469008 GN=robA PE=4 SV=1	FALSE	TRUE	FALSE	15.5709	4	5	4	1.92415e+08	9.18
High	A0A140N699	Dihydrothymine dehydrogenase OS=Escherichia coli (strain B / BL21-DE3) OX=469008 GN=preA PE=3 SV=1	FALSE	TRUE	FALSE	18.9781	5	7	5	1.4325e+08	10.53
High	A0A140NFM9	UDP-N-acetylglucosamine 2-epimerase OS=Escherichia coli (strain B / BL21-DE3) OX=469008 GN=wecB PE=3 SV=1	FALSE	TRUE	FALSE	24.734	5	6	5	1.30519e+08	7.57
High	A0A140N5J7	3-deoxy-D-manno-octulosonate 8-phosphate phosphatase KdsC OS=Escherichia coli (strain B / BL21-DE3) OX=469008 GN=kdsC PE=1 SV=1	FALSE	TRUE	FALSE	29.2553	4	5	4	1.29382e+08	9.66
High	A0A140N7F8	Elongation factor P-like protein OS=Escherichia coli (strain B / BL21-DE3) OX=469008 GN=yeiP PE=3 SV=1	FALSE	TRUE	FALSE	27.3684	4	6	4	8.47629e+07	9.33
High	A0A140NDB7	UPF0246 protein YaaA OS=Escherichia coli (strain B / BL21-DE3) OX=469008 GN=yaaA PE=3 SV=1	FALSE	TRUE	FALSE	33.7209	6	7	6	7.33281e+07	4.29
High	A0A140NDH7	Fructose-1,6-bisphosphatase OS=Escherichia coli (strain B / BL21-DE3) OX=469008 GN=ECBD_4099 PE=3 SV=1	FALSE	TRUE	FALSE	11.8734	3	4	3	4.91218e+07	7.82
High	A0A140SS71	50S ribosomal protein L31 OS=Escherichia coli (strain B / BL21-DE3) OX=469008 GN=rpmE PE=3 SV=1	FALSE	TRUE	FALSE	48.5714	3	5	3	4.99494e+08	11.68
High	A0A140N5E7	Exopolyphosphatase OS=Escherichia coli (strain B / BL21-DE3) OX=469008 GN=ppx PE=3 SV=1	FALSE	TRUE	FALSE	13.8402	5	5	5	1.32889e+08	7.06
High	A0A140N5Q7	Adenylate cyclase OS=Escherichia coli (strain B / BL21-DE3) OX=469008 GN=ygiF PE=4 SV=1	FALSE	TRUE	FALSE	17.0901	6	8	6	1.63604e+08	7.41
High	A0A140NC65	Peptide chain release factor 3 OS=Escherichia coli (strain B / BL21-DE3) OX=469008 GN=prfC PE=3 SV=1	FALSE	TRUE	FALSE	15.3119	6	6	6	9.88341e+07	12.01
High	A0A140SS76	Bifunctional purine biosynthesis protein PurH OS=Escherichia coli (strain B / BL21-DE3) OX=469008 GN=purH PE=3 SV=1	FALSE	TRUE	FALSE	12.2873	5	5	5	4.12327e+07	7.75
High	A0A140NFA7	Methionine import ATP-binding protein MetN OS=Escherichia coli (strain B / BL21-DE3) OX=469008 GN=metN PE=3 SV=1	FALSE	TRUE	FALSE	23.3236	4	4	4	5.68117e+07	10.79
High	A0A140NF92	Universal stress protein OS=Escherichia coli (strain B / BL21-DE3) OX=469008 GN=uspD PE=3 SV=1	FALSE	TRUE	FALSE	32.3944	4	6	4	1.43323e+08	15.96
High	A0A140NCM3	tRNA-specific 2-thiouridylase MnmA OS=Escherichia coli (strain B / BL21-DE3) OX=469008 GN=mnmA PE=3 SV=1	FALSE	TRUE	FALSE	15.4891	3	5	3	313797961	11.38
High	A0A140N6Z1	Mannose-6-phosphate isomerase OS=Escherichia coli (strain B / BL21-DE3) OX=469008 GN=manA PE=3 SV=1	FALSE	TRUE	FALSE	24.0409	6	7	6	1.42491e+08	5.75
High	A0A140NB97	Hydrolase, TatD family OS=Escherichia coli (strain B / BL21-DE3) OX=469008 GN=ECBD_2501 PE=3 SV=1	FALSE	TRUE	FALSE	38.4906	6	8	6	1.44342e+08	9.2
High	A0A140NDF8	UPF0502 protein YceH OS=Escherichia coli (strain B / BL21-DE3) OX=469008 GN=yceH PE=3 SV=1	FALSE	TRUE	FALSE	39.5349	5	5	5	3.04147e+08	12.15
High	A0A140NA85	dCTP deaminase OS=Escherichia coli (strain B / BL21-DE3) OX=469008 GN=dcd PE=3 SV=1	FALSE	TRUE	FALSE	17.0984	3	7	3	1.26015e+08	8.45
High	A0A140N8B5	CinA-like protein OS=Escherichia coli (strain B / BL21-DE3) OX=469008 GN=ECBD_1410 PE=3 SV=1	FALSE	TRUE	FALSE	19.75	5	5	5	1.15513e+08	6.1
High	A0A140NAB2	YciN family protein OS=Escherichia coli (strain B / BL21-DE3) OX=469008 GN=ECBD_2349 PE=4 SV=1	FALSE	TRUE	FALSE	46.988	4	4	4	1.94599e+07	7.42
High	A0A140NG24	Poly(A) polymerase I OS=Escherichia coli (strain B / BL21-DE3) OX=469008 GN=pcnB PE=3 SV=1	FALSE	TRUE	FALSE	14.4068	6	6	6	7.25374e+07	6.51
High	A0A140SSA1	HemY protein OS=Escherichia coli (strain B / BL21-DE3) OX=469008 GN=hemY PE=4 SV=1	FALSE	TRUE	FALSE	12.8141	4	5	4	8.19908e+07	8.95
High	A0A140N4Y7	ATP-dependent RNA helicase DeaD OS=Escherichia coli (strain B / BL21-DE3) OX=469008 GN=deaD PE=3 SV=1	FALSE	TRUE	FALSE	10.1749	5	5	5	9.39923e+07	8.68
High	A0A140NC63	TonB-dependent receptor OS=Escherichia coli (strain B / BL21-DE3) OX=469008 GN=ECBD_2188 PE=3 SV=1	FALSE	TRUE	FALSE	14.1429	5	6	5	2.3941e+07	13.74
High	A0A140NFF4	Queuine tRNA-ribosyltransferase OS=Escherichia coli (strain B / BL21-DE3) OX=469008 GN=tgt PE=3 SV=1	FALSE	TRUE	FALSE	17.8667	4	5	4	7.88351e+07	2.76
High	A0A140NFL5	Uncharacterized lipoprotein YifL OS=Escherichia coli (strain B / BL21-DE3) OX=469008 GN=ECBD_4233 PE=4 SV=1	FALSE	TRUE	FALSE	34.3284	2	5	2	1.99484e+08	6.95
High	A0A140NBD0	ErfK/YbiS/YcfS/YnhG family protein OS=Escherichia coli (strain B / BL21-DE3) OX=469008 GN=ldtE PE=3 SV=1	FALSE	TRUE	FALSE	20.9581	4	4	4	3.04308e+08	9.19
High	A0A140N7Y8	Octaprenyl diphosphate synthase OS=Escherichia coli (strain B / BL21-DE3) OX=469008 GN=ispB PE=3 SV=1	FALSE	TRUE	FALSE	17.3375	4	6	4	6.38733e+07	6.71
High	A0A140NFK0	Methionine synthase OS=Escherichia coli (strain B / BL21-DE3) OX=469008 GN=metH PE=3 SV=1	FALSE	TRUE	FALSE	7.57946	6	6	6	1.73086e+07	8.67
High	A0A140N784	3-dehydroquinate synthase OS=Escherichia coli (strain B / BL21-DE3) OX=469008 GN=aroB PE=3 SV=1	FALSE	TRUE	FALSE	25.1381	7	7	7	2.04674e+07	10.52
High	A0A140N7K8	30S ribosomal protein S14 OS=Escherichia coli (strain B / BL21-DE3) OX=469008 GN=rpsN PE=3 SV=1	FALSE	TRUE	FALSE	38.6139	4	9	4	6.94766e+07	13.44
High	A0A140N7W7	Bifunctional glutathionylspermidine amidase/synthase OS=Escherichia coli (strain B / BL21-DE3) OX=469008 GN=gss PE=3 SV=1	FALSE	TRUE	FALSE	8.5622	3	4	3	1.10345e+08	10.85
High	A0A140NEP7	Glucosamine-6-phosphate deaminase OS=Escherichia coli (strain B / BL21-DE3) OX=469008 GN=nagB PE=3 SV=1	FALSE	TRUE	FALSE	28.1955	5	6	5	101432939	6.8
High	A0A140NAA6	Stress response protein ElaB OS=Escherichia coli (strain B / BL21-DE3) OX=469008 GN=elaB PE=3 SV=1	FALSE	TRUE	FALSE	26.7327	3	8	3	1.66821e+08	16.04
High	A0A140NDV2	Integration host factor subunit beta OS=Escherichia coli (strain B / BL21-DE3) OX=469008 GN=ihfB PE=3 SV=1	FALSE	TRUE	FALSE	34.0426	3	8	3	2.14419e+08	10.14
High	A0A140NCI1	Dihydroxyacetone kinase ADP-binding subunit DhaL OS=Escherichia coli (strain B / BL21-DE3) OX=469008 GN=dhaL PE=4 SV=1	FALSE	TRUE	FALSE	12.8571	3	4	3	9.01071e+07	5.43
High	A0A140NF85	Class II glutamine amidotransferase OS=Escherichia coli (strain B / BL21-DE3) OX=469008 GN=ECBD_3399 PE=4 SV=1	FALSE	TRUE	FALSE	37.2549	6	7	6	54202227	16.23
High	A0A140NDM3	UDP-N-acetylglucosamine--N-acetylmuramyl-(pentapeptide) pyrophosphoryl-undecaprenol N-acetylglucosamine transferase OS=Escherichia coli (strain B / BL21-DE3) OX=469008 GN=murG PE=3 SV=1	FALSE	TRUE	FALSE	20	5	6	5	3.96824e+07	11.13
High	A0A140NEW9	Anaerobic ribonucleoside-triphosphate reductase OS=Escherichia coli (strain B / BL21-DE3) OX=469008 GN=nrdD PE=4 SV=1	FALSE	TRUE	FALSE	11.6573	6	7	6	5.79548e+07	14.91
High	A0A140SS21	23S rRNA (guanosine-2'-O-)-methyltransferase RlmB OS=Escherichia coli (strain B / BL21-DE3) OX=469008 GN=rlmB PE=3 SV=1	FALSE	TRUE	FALSE	36.6255	5	7	5	9.80779e+07	14.41
High	A0A140N5P0	Ribosomal RNA small subunit methyltransferase I OS=Escherichia coli (strain B / BL21-DE3) OX=469008 GN=rsmI PE=3 SV=1	FALSE	TRUE	FALSE	16.7832	5	6	5	1.02758e+08	4.28
High	A0A140NA70	Cytochrome d ubiquinol oxidase subunit II OS=Escherichia coli (strain B / BL21-DE3) OX=469008 GN=cydB PE=3 SV=1	FALSE	TRUE	FALSE	11.6095	5	8	5	1.61246e+08	8.79
High	A0A140NEV3	1-deoxy-D-xylulose-5-phosphate synthase OS=Escherichia coli (strain B / BL21-DE3) OX=469008 GN=dxs PE=3 SV=1	FALSE	TRUE	FALSE	9.35484	4	5	4	7.83365e+07	13.19
High	A0A140N7P3	RNA polymerase sigma-54 factor OS=Escherichia coli (strain B / BL21-DE3) OX=469008 GN=rpoN PE=3 SV=1	FALSE	TRUE	FALSE	10.0629	3	5	3	1.9737e+07	9.05
High	A0A140N7B9	Exodeoxyribonuclease III OS=Escherichia coli (strain B / BL21-DE3) OX=469008 GN=ECBD_1895 PE=3 SV=1	FALSE	TRUE	FALSE	27.5735	7	7	7	3.1631e+08	6.55
High	A0A140N9N0	Arginine ABC transporter ATP-binding protein ArtP OS=Escherichia coli (strain B / BL21-DE3) OX=469008 GN=artP PE=3 SV=1	FALSE	TRUE	FALSE	33.8843	5	6	5	1.57014e+08	6.72
High	A0A140N937	DNA-binding transcriptional regulator YdfH OS=Escherichia coli (strain B / BL21-DE3) OX=469008 GN=ydfH PE=4 SV=1	FALSE	TRUE	FALSE	15.3509	2	3	2	5.90689e+07	8.29
High	A0A140NBN4	Iron-sulfur cluster insertion protein ErpA OS=Escherichia coli (strain B / BL21-DE3) OX=469008 GN=erpA PE=3 SV=1	FALSE	TRUE	FALSE	29.8246	3	7	3	3.47807e+08	12.44
High	A0A140N3P8	Aerobic respiration control sensor protein OS=Escherichia coli (strain B / BL21-DE3) OX=469008 GN=arcB PE=4 SV=1	FALSE	TRUE	FALSE	7.45501	4	6	4	2.50675e+07	6.07
High	A0A140N2G7	Glucose-1-phosphate adenylyltransferase OS=Escherichia coli (strain B / BL21-DE3) OX=469008 GN=glgC PE=3 SV=1	FALSE	TRUE	FALSE	13.4571	4	4	4	5.80489e+07	6.07
High	A0A140N3S1	Ribosome assembly RNA-binding protein YhbY OS=Escherichia coli (strain B / BL21-DE3) OX=469008 GN=yhbY PE=4 SV=1	FALSE	TRUE	FALSE	68.0412	4	5	4	2.39272e+08	1.99
High	A0A140N3G6	Small heat shock protein IbpB OS=Escherichia coli (strain B / BL21-DE3) OX=469008 GN=ibpB PE=3 SV=1	FALSE	TRUE	FALSE	50	7	13	7	1.93992e+08	18.11
High	A0A140N692	DUF3053 domain-containing protein OS=Escherichia coli (strain B / BL21-DE3) OX=469008 GN=ECBD_0183 PE=4 SV=1	FALSE	TRUE	FALSE	30.0847	5	5	5	1.87114e+08	8.81
High	A0A140NEN2	DUF4156 domain-containing protein OS=Escherichia coli (strain B / BL21-DE3) OX=469008 GN=ECBD_3887 PE=4 SV=1	FALSE	TRUE	FALSE	30.7692	2	6	2	7.90007e+08	11.12
High	A0A140NA57	Phosphatase NudJ OS=Escherichia coli (strain B / BL21-DE3) OX=469008 GN=nudJ PE=3 SV=1	FALSE	TRUE	FALSE	25.4902	2	4	2	8.83386e+07	8.31
High	A0A140NBV7	Translation initiation factor IF-1 OS=Escherichia coli (strain B / BL21-DE3) OX=469008 GN=infA PE=3 SV=1	FALSE	TRUE	FALSE	47.2222	2	3	2	5.13156e+08	5.22
High	A0A140NF68	Cys-tRNA(Pro)/Cys-tRNA(Cys) deacylase OS=Escherichia coli (strain B / BL21-DE3) OX=469008 GN=ybaK PE=3 SV=1	FALSE	TRUE	FALSE	44.6541	4	4	4	2.3318e+08	4.27
High	A0A140N5Z1	Murein hydrolase activator NlpD OS=Escherichia coli (strain B / BL21-DE3) OX=469008 GN=nlpD PE=4 SV=1	FALSE	TRUE	FALSE	19.2612	4	4	4	3.6955e+07	8.88
High	A0A140N8F6	HTH-type transcriptional regulator ArgP OS=Escherichia coli (strain B / BL21-DE3) OX=469008 GN=argP PE=3 SV=1	FALSE	TRUE	FALSE	23.9057	5	5	5	2.85276e+07	4.64
High	A0A140N9M5	SDR family oxidoreductase UcpA OS=Escherichia coli (strain B / BL21-DE3) OX=469008 GN=ucpA PE=4 SV=1	FALSE	TRUE	FALSE	22.0532	4	4	4	1.33691e+08	7.31
High	A0A140N6G5	HlyD family secretion protein OS=Escherichia coli (strain B / BL21-DE3) OX=469008 GN=ECBD_0253 PE=4 SV=1	FALSE	TRUE	FALSE	23.0986	6	6	6	6.18843e+07	8.66
High	A0A140N2N4	ABC transporter ATP-binding protein OS=Escherichia coli (strain B / BL21-DE3) OX=469008 GN=ECBD_0396 PE=4 SV=1	FALSE	TRUE	FALSE	12.8728	5	5	5	5.40708e+07	10.44
High	A0A140N6Z3	NADP-dependent succinate-semialdehyde dehydrogenase OS=Escherichia coli (strain B / BL21-DE3) OX=469008 GN=gabD PE=3 SV=1	FALSE	TRUE	FALSE	12.4481	4	5	3	9.58424e+07	3.82
High	A0A140N7D9	Gamma-aminobutyraldehyde dehydrogenase OS=Escherichia coli (strain B / BL21-DE3) OX=469008 GN=patD PE=3 SV=1	FALSE	TRUE	FALSE	15.4008	4	4	4	1.34595e+08	4.47
High	A0A140NCP8	Ribosomal silencing factor RsfS OS=Escherichia coli (strain B / BL21-DE3) OX=469008 GN=rsfS PE=3 SV=1	FALSE	TRUE	FALSE	38.0952	2	3	2	1.36405e+08	7.87
High	A0A140SS30	Elongation factor P OS=Escherichia coli (strain B / BL21-DE3) OX=469008 GN=efp PE=3 SV=1	FALSE	TRUE	FALSE	17.0213	2	5	2	1.05558e+09	11.83
High	A0A140N969	Phospho-2-dehydro-3-deoxyheptonate aldolase OS=Escherichia coli (strain B / BL21-DE3) OX=469008 GN=aroH PE=3 SV=1	FALSE	TRUE	FALSE	17.2414	5	5	5	148330215	7.93
High	A0A140N8Z4	Protein MtfA OS=Escherichia coli (strain B / BL21-DE3) OX=469008 GN=mtfA PE=3 SV=1	FALSE	TRUE	FALSE	17.3585	4	5	4	1.19998e+08	9.67
High	A0A140NFD8	Transcription antitermination protein NusB OS=Escherichia coli (strain B / BL21-DE3) OX=469008 GN=nusB PE=3 SV=1	FALSE	TRUE	FALSE	48.9209	6	6	6	6.34128e+08	2.73
High	A0A140N6W3	Phosphoenolpyruvate--protein phosphotransferase OS=Escherichia coli (strain B / BL21-DE3) OX=469008 GN=ptsP PE=3 SV=1	FALSE	TRUE	FALSE	7.62032	5	5	5	2.36539e+07	9.05
High	A0A140N6I7	Enhanced serine sensitivity protein SseB OS=Escherichia coli (strain B / BL21-DE3) OX=469008 GN=sseB PE=4 SV=1	FALSE	TRUE	FALSE	11.2403	2	5	2	1.07057e+08	10.3
High	A0A140N4F1	ADP-heptose--LPS heptosyltransferase RfaF OS=Escherichia coli (strain B / BL21-DE3) OX=469008 GN=rfaF PE=4 SV=1	FALSE	TRUE	FALSE	26.7241	5	5	5	8.37014e+07	4.43
High	A0A140N9M6	Extracellular solute-binding protein family 3 OS=Escherichia coli (strain B / BL21-DE3) OX=469008 GN=gltI PE=4 SV=1	FALSE	TRUE	FALSE	22.5166	5	5	5	1.28148e+08	12.16
High	A0A140N5D7	50S ribosomal protein L21 OS=Escherichia coli (strain B / BL21-DE3) OX=469008 GN=rplU PE=3 SV=1	FALSE	TRUE	FALSE	49.5146	6	6	6	2.4906e+09	4.79
High	A0A140NBV1	Bor family protein OS=Escherichia coli (strain B / BL21-DE3) OX=469008 GN=bor PE=4 SV=1	FALSE	TRUE	FALSE	25.7732	2	8	1	5.76044e+07	13.16
High	A0A140NDL8	Fatty acid biosynthesis protein FabY OS=Escherichia coli (strain B / BL21-DE3) OX=469008 GN=fabY PE=4 SV=1	FALSE	TRUE	FALSE	24.6006	5	6	5	1.39893e+08	8.91
High	A0A140NGK1	RNA-binding protein Hfq OS=Escherichia coli (strain B / BL21-DE3) OX=469008 GN=hfq PE=1 SV=1	FALSE	TRUE	FALSE	88.2353	6	10	3	3.49103e+08	9.13
High	A0A140N4V4	Cell division ATP-binding protein FtsE OS=Escherichia coli (strain B / BL21-DE3) OX=469008 GN=ftsE PE=3 SV=1	FALSE	TRUE	FALSE	38.7387	5	6	5	2.00927e+08	6.8
High	A0A140N5M2	tRNA pseudouridine synthase B OS=Escherichia coli (strain B / BL21-DE3) OX=469008 GN=truB PE=3 SV=1	FALSE	TRUE	FALSE	14.9682	4	5	4	9.93957e+07	8.67
High	A0A140NFW5	Protein CreA OS=Escherichia coli (strain B / BL21-DE3) OX=469008 GN=creA PE=4 SV=1	FALSE	TRUE	FALSE	41.4013	3	4	3	1.50134e+08	10
High	A0A140NA88	Cytochrome bo(3) ubiquinol oxidase subunit 1 OS=Escherichia coli (strain B / BL21-DE3) OX=469008 GN=cyoB PE=3 SV=1	FALSE	TRUE	FALSE	6.78733	3	4	3	3.80699e+08	6.83
High	A0A140NEM8	Ferrochelatase OS=Escherichia coli (strain B / BL21-DE3) OX=469008 GN=hemH PE=3 SV=1	FALSE	TRUE	FALSE	16.875	4	4	4	3.10435e+07	4.64
High	A0A140N332	ABC transporter related OS=Escherichia coli (strain B / BL21-DE3) OX=469008 GN=mlaF PE=4 SV=1	FALSE	TRUE	FALSE	20.0743	3	4	3	6.01067e+07	8.69
High	A0A140NAQ0	Iron-sulfur cluster carrier protein OS=Escherichia coli (strain B / BL21-DE3) OX=469008 GN=apbC PE=3 SV=1	FALSE	TRUE	FALSE	9.21409	2	3	2	5.35025e+08	2.76
High	A0A140NE32	Adenine/cytosine-specific restriction endonuclease Mrr OS=Escherichia coli (strain B / BL21-DE3) OX=469008 GN=mrr PE=4 SV=1	FALSE	TRUE	FALSE	17.4342	3	3	3	4.95091e+07	4.33
High	A0A140NB60	RNA polymerase-associated protein RapA OS=Escherichia coli (strain B / BL21-DE3) OX=469008 GN=rapA PE=3 SV=1	FALSE	TRUE	FALSE	5.06198	4	4	4	3.26093e+07	1.83
High	A0A140NB24	1-deoxyxylulose-5-phosphate synthase YajO OS=Escherichia coli (strain B / BL21-DE3) OX=469008 GN=yajO PE=4 SV=1	FALSE	TRUE	FALSE	11.1111	4	5	4	4.98683e+06	12.15
High	A0A140NB99	Cysteine desulfurase OS=Escherichia coli (strain B / BL21-DE3) OX=469008 GN=sufS PE=3 SV=1	FALSE	TRUE	FALSE	14.532	4	5	4	1.2386e+07	6.9
High	A0A140N7G4	50S ribosomal protein L30 OS=Escherichia coli (strain B / BL21-DE3) OX=469008 GN=rpmD PE=3 SV=1	FALSE	TRUE	FALSE	59.322	4	8	4	1.3157e+09	5.52
High	A0A140N6R8	Cell division protein DamX OS=Escherichia coli (strain B / BL21-DE3) OX=469008 GN=damX PE=3 SV=1	FALSE	TRUE	FALSE	15.8879	3	5	3	1.14963e+08	10.46
High	A0A140NBD7	Pyridoxine/pyridoxamine 5'-phosphate oxidase OS=Escherichia coli (strain B / BL21-DE3) OX=469008 GN=pdxH PE=3 SV=1	FALSE	TRUE	FALSE	26.6055	4	4	4	2.95257e+08	8.08
High	A0A140SSB6	5-amino-6-(5-phospho-D-ribitylamino)uracil phosphatase YigB OS=Escherichia coli (strain B / BL21-DE3) OX=469008 GN=yigB PE=4 SV=1	FALSE	TRUE	FALSE	30.6723	5	5	5	1.33331e+08	2.57
High	A0A140NAP6	Two component transcriptional regulator, LuxR family OS=Escherichia coli (strain B / BL21-DE3) OX=469008 GN=narL PE=4 SV=1	FALSE	TRUE	FALSE	25.463	3	3	3	1.3605e+08	6.43
High	A0A140NFZ6	Transport-associated OS=Escherichia coli (strain B / BL21-DE3) OX=469008 GN=ECBD_3645 PE=4 SV=1	FALSE	TRUE	FALSE	36.1809	4	4	4	1.15855e+08	9.05
High	A0A140N6I3	Integrase family protein OS=Escherichia coli (strain B / BL21-DE3) OX=469008 GN=ECBD_0066 PE=4 SV=1	FALSE	TRUE	FALSE	25.3807	6	6	6	6.43218e+07	6.79
High	A0A140NEJ9	HTH-type transcriptional repressor AllR OS=Escherichia coli (strain B / BL21-DE3) OX=469008 GN=allR PE=4 SV=1	FALSE	TRUE	FALSE	21.4022	5	6	5	1.41698e+08	5.73
High	A0A140NGB9	Ornithine carbamoyltransferase OS=Escherichia coli (strain B / BL21-DE3) OX=469008 GN=argI PE=3 SV=1	FALSE	TRUE	FALSE	26.6467	6	6	5	1.33728e+08	6.36
High	A0A140NDG9	Beta-lactamase domain protein OS=Escherichia coli (strain B / BL21-DE3) OX=469008 GN=gloC PE=4 SV=1	FALSE	TRUE	FALSE	48.3721	5	6	5	2.02976e+08	9.18
High	A0A140NAY9	Aspartate 1-decarboxylase OS=Escherichia coli (strain B / BL21-DE3) OX=469008 GN=panD PE=3 SV=1	FALSE	TRUE	FALSE	21.4286	2	5	2	170043429	13.58
High	A0A140NF13	S-(hydroxymethyl)glutathione dehydrogenase OS=Escherichia coli (strain B / BL21-DE3) OX=469008 GN=frmA PE=3 SV=1	FALSE	TRUE	FALSE	23.5772	4	6	4	2.85275e+08	6.73
High	A0A140NCZ8	S-adenosylmethionine decarboxylase proenzyme OS=Escherichia coli (strain B / BL21-DE3) OX=469008 GN=speD PE=3 SV=1	FALSE	TRUE	FALSE	22.7273	3	4	3	7.91973e+07	10.42
High	A0A140N6N2	Glycerol-3-phosphate dehydrogenase [NAD(P)+] OS=Escherichia coli (strain B / BL21-DE3) OX=469008 GN=gpsA PE=3 SV=1	FALSE	TRUE	FALSE	15.9292	4	5	4	1.50559e+08	6.72
High	A0A140N7A5	Nucleoside diphosphate kinase OS=Escherichia coli (strain B / BL21-DE3) OX=469008 GN=ndk PE=3 SV=1	FALSE	TRUE	FALSE	42.6573	5	8	5	5.18068e+08	6.76
High	A0A140NC13	Outer membrane lipoprotein Blc OS=Escherichia coli (strain B / BL21-DE3) OX=469008 GN=blc PE=3 SV=1	FALSE	TRUE	FALSE	32.5843	4	5	4	8.02276e+07	8.89
High	A0A140NDZ5	Ribosomal RNA small subunit methyltransferase C OS=Escherichia coli (strain B / BL21-DE3) OX=469008 GN=rsmC PE=3 SV=1	FALSE	TRUE	FALSE	20.1166	5	5	5	1.28876e+08	8.64
High	A0A140N534	Phosphoglycolate phosphatase OS=Escherichia coli (strain B / BL21-DE3) OX=469008 GN=gph PE=3 SV=1	FALSE	TRUE	FALSE	21.4286	5	5	5	3.56822e+07	12.14
High	A0A140NCD3	Recombination-associated protein RdgC OS=Escherichia coli (strain B / BL21-DE3) OX=469008 GN=rdgC PE=3 SV=1	FALSE	TRUE	FALSE	19.0769	5	5	5	3.53726e+07	7.64
High	A0A140NGF3	Molybdenum cofactor synthesis domain protein OS=Escherichia coli (strain B / BL21-DE3) OX=469008 GN=mog PE=4 SV=1	FALSE	TRUE	FALSE	18.4615	4	5	4	1.74376e+08	8.13
High	A0A140NCW5	Lipoprotein OS=Escherichia coli (strain B / BL21-DE3) OX=469008 GN=ECBD_3224 PE=4 SV=1	FALSE	TRUE	FALSE	21.875	4	11	4	2.59094e+07	19.25
High	A0A140NAR4	2,5-didehydrogluconate reductase DkgB OS=Escherichia coli (strain B / BL21-DE3) OX=469008 GN=dkgB PE=4 SV=1	FALSE	TRUE	FALSE	16.4794	3	6	3	4.49024e+07	6.09
High	A0A140N8D9	NADPH-dependent 7-cyano-7-deazaguanine reductase OS=Escherichia coli (strain B / BL21-DE3) OX=469008 GN=queF PE=3 SV=1	FALSE	TRUE	FALSE	19.1489	6	7	6	9.62061e+07	11.15
High	A0A140N8K1	LysR family transcriptional regulator OS=Escherichia coli (strain B / BL21-DE3) OX=469008 GN=ECBD_1501 PE=3 SV=1	FALSE	TRUE	FALSE	19.1126	4	4	4	5.28424e+07	7.22
High	A0A140NA72	Peptidase U32 OS=Escherichia coli (strain B / BL21-DE3) OX=469008 GN=ECBD_1572 PE=4 SV=1	FALSE	TRUE	FALSE	18.543	4	4	4	5.31342e+07	5.04
High	A0A140N307	IS600 orf OS=Escherichia coli (strain B / BL21-DE3) OX=469008 GN=ECBD_0527 PE=4 SV=1	FALSE	TRUE	FALSE	38.6139	3	4	3	5.31746e+07	2.1
High	A0A140N6F3	Sodium/glutamate symporter OS=Escherichia coli (strain B / BL21-DE3) OX=469008 GN=gltS PE=3 SV=1	FALSE	TRUE	FALSE	14.2145	2	4	2	1.16377e+09	7.91
High	A0A140N7N4	NADH-quinone oxidoreductase subunit A OS=Escherichia coli (strain B / BL21-DE3) OX=469008 GN=nuoA PE=1 SV=1	FALSE	TRUE	FALSE	19.0476	3	4	3	5.43575e+08	10.11
High	A0A140N953	YecA family protein OS=Escherichia coli (strain B / BL21-DE3) OX=469008 GN=ECBD_1732 PE=4 SV=1	FALSE	TRUE	FALSE	31.6742	5	5	5	1.61191e+08	5.66
High	A0A140NGH6	PTS system, trehalose-specific IIBC subunit OS=Escherichia coli (strain B / BL21-DE3) OX=469008 GN=treB PE=4 SV=1	FALSE	TRUE	FALSE	7.39958	3	5	3	1.34326e+08	6.02
High	C6EGE8	50S ribosomal protein L23 OS=Escherichia coli (strain B / BL21-DE3) OX=469008 GN=rplW PE=1 SV=1	FALSE	TRUE	FALSE	34	3	21	3	8.23319e+07	60.96
High	A0A140NAZ8	Polyamine aminopropyltransferase OS=Escherichia coli (strain B / BL21-DE3) OX=469008 GN=speE PE=3 SV=1	FALSE	TRUE	FALSE	28.125	4	4	4	5.93294e+07	9.41
High	A0A140NGU5	Acetyl-coenzyme A synthetase OS=Escherichia coli (strain B / BL21-DE3) OX=469008 GN=acs PE=3 SV=1	FALSE	TRUE	FALSE	10.5828	5	5	5	8.19407e+07	6.13
High	A0A140N6X3	Alanine transaminase OS=Escherichia coli (strain B / BL21-DE3) OX=469008 GN=alaC PE=4 SV=1	FALSE	TRUE	FALSE	23.7864	6	7	6	1.32646e+08	15.1
High	A0A140SS69	Bifunctional L-1,2-propanediol dehydrogenase/glycerol dehydrogenase OS=Escherichia coli (strain B / BL21-DE3) OX=469008 GN=gldA PE=3 SV=1	FALSE	TRUE	FALSE	31.0627	5	7	5	1.9286e+08	11
High	A0A140ND33	Ribosomal RNA large subunit methyltransferase I OS=Escherichia coli (strain B / BL21-DE3) OX=469008 GN=rlmI PE=3 SV=1	FALSE	TRUE	FALSE	10.7417	4	5	4	4.12664e+07	4.66
High	A0A140NB23	Peptidyl-tRNA hydrolase OS=Escherichia coli (strain B / BL21-DE3) OX=469008 GN=pth PE=3 SV=1	FALSE	TRUE	FALSE	24.2268	3	4	3	1.13707e+08	4.51
High	A0A140NAA3	Riboflavin biosynthesis protein RibD OS=Escherichia coli (strain B / BL21-DE3) OX=469008 GN=ribD PE=3 SV=1	FALSE	TRUE	FALSE	17.1662	4	5	4	5.36e+07	6.03
High	A0A140N6N7	Short-chain dehydrogenase/reductase SDR OS=Escherichia coli (strain B / BL21-DE3) OX=469008 GN=srlD PE=3 SV=1	FALSE	TRUE	FALSE	23.9382	3	3	3	1.01758e+08	5.77
High	A0A140N6P1	Phosphoenolpyruvate synthase regulatory protein OS=Escherichia coli (strain B / BL21-DE3) OX=469008 GN=ppsR PE=3 SV=1	FALSE	TRUE	FALSE	26.3538	5	5	5	5.7468e+07	6.25
High	A0A140N635	Acetoacetate metabolism transcriptional regulator AtoC OS=Escherichia coli (strain B / BL21-DE3) OX=469008 GN=atoC PE=4 SV=1	FALSE	TRUE	FALSE	9.97831	4	4	4	3.02991e+07	7.78
High	A0A140N8L5	Probable Fe(2+)-trafficking protein OS=Escherichia coli (strain B / BL21-DE3) OX=469008 GN=yggX PE=3 SV=1	FALSE	TRUE	FALSE	58.2418	5	6	5	2.69557e+08	8.64
High	A0A140N556	Peptide deformylase OS=Escherichia coli (strain B / BL21-DE3) OX=469008 GN=def PE=1 SV=1	FALSE	TRUE	FALSE	20.7101	3	4	3	3.07808e+08	4.21
High	A0A140NG19	NAD(P)H-flavin reductase OS=Escherichia coli (strain B / BL21-DE3) OX=469008 GN=fre PE=4 SV=1	FALSE	TRUE	FALSE	15.8798	3	4	3	1.44921e+08	8.78
High	A0A140N8F1	DNA gyrase inhibitor OS=Escherichia coli (strain B / BL21-DE3) OX=469008 GN=sbmC PE=3 SV=1	FALSE	TRUE	FALSE	28.6624	4	6	4	1.40099e+08	6.68
High	A0A140N5V1	Glyoxalase OS=Escherichia coli (strain B / BL21-DE3) OX=469008 GN=elbB PE=3 SV=1	FALSE	TRUE	FALSE	36.8664	4	6	4	8.45606e+08	10.47
High	A0A140N880	tRNA U34 carboxymethyltransferase OS=Escherichia coli (strain B / BL21-DE3) OX=469008 GN=cmoB PE=3 SV=1	FALSE	TRUE	FALSE	19.8142	5	5	5	9.55634e+07	6.36
High	A0A140NB38	2-dehydro-3-deoxy-phosphogluconate aldolase OS=Escherichia coli (strain B / BL21-DE3) OX=469008 GN=kdgA PE=1 SV=1	FALSE	TRUE	FALSE	39.9061	6	7	6	6.71729e+08	5.73
High	A0A140NC35	Bifunctional aspartokinase/homoserine dehydrogenase OS=Escherichia coli (strain B / BL21-DE3) OX=469008 GN=thrA PE=3 SV=1	FALSE	TRUE	FALSE	6.82927	4	4	4	4.05789e+07	7.92
High	A0A140N457	Guanylate kinase OS=Escherichia coli (strain B / BL21-DE3) OX=469008 GN=gmk PE=3 SV=1	FALSE	TRUE	FALSE	28.9855	4	5	4	4.33112e+07	6.9
High	A0A140ND42	NAD/NADP-dependent betaine aldehyde dehydrogenase OS=Escherichia coli (strain B / BL21-DE3) OX=469008 GN=betB PE=3 SV=1	FALSE	TRUE	FALSE	13.0612	3	4	2	4.88368e+07	7.28
High	A0A140NHS9	Histidine kinase OS=Escherichia coli (strain B / BL21-DE3) OX=469008 GN=cpxA PE=4 SV=1	FALSE	TRUE	FALSE	10.9409	4	4	4	3.54739e+07	3.19
High	A0A140NDI2	Beta-galactosidase OS=Escherichia coli (strain B / BL21-DE3) OX=469008 GN=lacZ PE=3 SV=1	TRUE	TRUE	FALSE	4.98047	3	3	3	4.42556e+07	7.7
High	A0A140N8L7	OmpW family protein OS=Escherichia coli (strain B / BL21-DE3) OX=469008 GN=ompW PE=4 SV=1	FALSE	TRUE	FALSE	24.0566	2	4	2	6.05695e+08	12.54
High	A0A140N6K5	Deoxyuridine 5'-triphosphate nucleotidohydrolase OS=Escherichia coli (strain B / BL21-DE3) OX=469008 GN=dut PE=3 SV=1	FALSE	TRUE	FALSE	21.7105	3	5	3	2.17037e+08	12.76
High	A0A140N9Z8	EIII-Fru OS=Escherichia coli (strain B / BL21-DE3) OX=469008 GN=fruB PE=4 SV=1	FALSE	TRUE	FALSE	16.7553	3	4	3	8.93261e+07	6.83
High	A0A140NB70	Intermembrane transport protein PqiB OS=Escherichia coli (strain B / BL21-DE3) OX=469008 GN=pqiB PE=4 SV=1	FALSE	TRUE	FALSE	11.9048	4	4	4	96959709	7.49
High	A0A140N8H4	Flavodoxin OS=Escherichia coli (strain B / BL21-DE3) OX=469008 GN=fldB PE=3 SV=1	FALSE	TRUE	FALSE	21.9653	2	3	2	8.96032e+07	2.94
High	A0A140NHU6	Formate dehydrogenase iron-sulfur subunit OS=Escherichia coli (strain B / BL21-DE3) OX=469008 GN=fdoH PE=4 SV=1	FALSE	TRUE	FALSE	23.3333	5	5	5	1.07304e+08	6.35
High	A0A140NAK0	Muramoyltetrapeptide carboxypeptidase OS=Escherichia coli (strain B / BL21-DE3) OX=469008 GN=ldcA PE=3 SV=1	FALSE	TRUE	FALSE	17.1053	3	3	3	2.66321e+07	1.98
High	A0A140NB33	Protein-export membrane protein SecF OS=Escherichia coli (strain B / BL21-DE3) OX=469008 GN=secF PE=3 SV=1	FALSE	TRUE	FALSE	21.3622	4	6	4	5.22121e+07	7.47
High	A0A140NEW0	Extracellular solute-binding protein family 5 OS=Escherichia coli (strain B / BL21-DE3) OX=469008 GN=ECBD_3210 PE=4 SV=1	FALSE	TRUE	FALSE	11.1307	5	5	5	1.44055e+08	6.22
High	A0A140N3Y5	DNA-binding transcriptional regulator YhaJ OS=Escherichia coli (strain B / BL21-DE3) OX=469008 GN=yhaJ PE=3 SV=1	FALSE	TRUE	FALSE	22.4832	4	4	4	2.99473e+07	9.62
High	A0A140N7Q4	Polyphosphate kinase OS=Escherichia coli (strain B / BL21-DE3) OX=469008 GN=ppk PE=3 SV=1	FALSE	TRUE	FALSE	9.01163	5	5	5	4.96236e+07	4.35
High	A0A140NG83	UDP-N-acetyl-D-mannosamine dehydrogenase OS=Escherichia coli (strain B / BL21-DE3) OX=469008 GN=wecC PE=3 SV=1	FALSE	TRUE	FALSE	11.1905	3	4	3	2.92889e+07	2.26
High	A0A140NCR0	Ribonuclease R OS=Escherichia coli (strain B / BL21-DE3) OX=469008 GN=rnr PE=3 SV=1	FALSE	TRUE	FALSE	13.2841	8	8	8	9.91018e+07	10.03
High	A0A140N9V2	Tryptophan synthase alpha chain OS=Escherichia coli (strain B / BL21-DE3) OX=469008 GN=trpA PE=3 SV=1	FALSE	TRUE	FALSE	26.8657	4	4	4	5.76588e+07	4.31
High	A0A140N6I0	HTH-type transcriptional regulator GalR OS=Escherichia coli (strain B / BL21-DE3) OX=469008 GN=galR PE=4 SV=1	FALSE	TRUE	FALSE	14.2857	4	5	4	1.53194e+07	9.98
High	A0A140SS66	MmcQ/YjbR family DNA-binding protein OS=Escherichia coli (strain B / BL21-DE3) OX=469008 GN=ECBD_3975 PE=4 SV=1	FALSE	TRUE	FALSE	38.1356	3	5	3	3.27225e+07	11.86
High	A0A140N7Q2	Phospholipid-binding protein MlaC OS=Escherichia coli (strain B / BL21-DE3) OX=469008 GN=mlaC PE=4 SV=1	FALSE	TRUE	FALSE	27.4882	5	6	5	2.43374e+08	10.64
High	A0A140N7V2	ATP phosphoribosyltransferase OS=Escherichia coli (strain B / BL21-DE3) OX=469008 GN=hisG PE=3 SV=1	FALSE	TRUE	FALSE	24.0803	4	4	4	1.20409e+08	8.67
High	A0A140NBN5	3-hydroxydecanoyl-[acyl-carrier-protein] dehydratase OS=Escherichia coli (strain B / BL21-DE3) OX=469008 GN=fabA PE=3 SV=1	FALSE	TRUE	FALSE	25	4	5	4	1.37928e+08	4.94
High	A0A140NF03	Glyoxylate bypass operon transcriptional repressor IclR OS=Escherichia coli (strain B / BL21-DE3) OX=469008 GN=iclR PE=4 SV=1	FALSE	TRUE	FALSE	19.708	4	4	4	5.66496e+07	6.35
High	A0A140N6D7	6-phospho-beta-glucosidase BglA OS=Escherichia coli (strain B / BL21-DE3) OX=469008 GN=bglA PE=3 SV=1	FALSE	TRUE	FALSE	13.2075	5	5	5	9.80537e+07	7.28
High	A0A140NFE8	Probable GTP-binding protein EngB OS=Escherichia coli (strain B / BL21-DE3) OX=469008 GN=engB PE=3 SV=1	FALSE	TRUE	FALSE	15.7143	2	3	2	1.17767e+08	6.06
High	A0A140N7R8	Lipopolysaccharide assembly protein A OS=Escherichia coli (strain B / BL21-DE3) OX=469008 GN=lapA PE=3 SV=1	FALSE	TRUE	FALSE	22.549	3	4	3	9.53464e+07	10.14
High	A0A140N5Y7	Ribosome-binding factor A OS=Escherichia coli (strain B / BL21-DE3) OX=469008 GN=rbfA PE=3 SV=1	FALSE	TRUE	FALSE	35.3383	4	4	4	1.48304e+08	6.33
High	A0A140N2J1	33 kDa chaperonin OS=Escherichia coli (strain B / BL21-DE3) OX=469008 GN=hslO PE=3 SV=1	FALSE	TRUE	FALSE	17.4658	3	4	3	3.52021e+08	9.6
High	A0A140N9P4	Dual-specificity RNA methyltransferase RlmN OS=Escherichia coli (strain B / BL21-DE3) OX=469008 GN=rlmN PE=3 SV=1	FALSE	TRUE	FALSE	12.7604	5	5	5	2.61307e+07	7.66
High	A0A140NC78	PTS N-acetyl glucosamine transporter subunit IIABC OS=Escherichia coli (strain B / BL21-DE3) OX=469008 GN=nagE PE=4 SV=1	FALSE	TRUE	FALSE	7.56173	4	5	4	2.17981e+07	8.51
High	A0A140NCR5	Acyl carrier protein OS=Escherichia coli (strain B / BL21-DE3) OX=469008 GN=acpP PE=3 SV=1	FALSE	TRUE	FALSE	33.3333	3	6	3	4.00319e+09	6.75
High	A0A140N8D8	Histidinol-phosphate aminotransferase OS=Escherichia coli (strain B / BL21-DE3) OX=469008 GN=hisC PE=3 SV=1	FALSE	TRUE	FALSE	11.236	3	3	3	2.71111e+07	7.47
High	A0A140N8B7	Aminotransferase class V OS=Escherichia coli (strain B / BL21-DE3) OX=469008 GN=csdA PE=3 SV=1	FALSE	TRUE	FALSE	9.22693	3	3	3	5.01884e+07	5.94
High	A0A140NFV5	LPS-assembly protein LptD OS=Escherichia coli (strain B / BL21-DE3) OX=469008 GN=lptD PE=3 SV=1	FALSE	TRUE	FALSE	8.16327	4	5	4	1.44308e+08	9.55
High	A0A140N864	Lipoprotein releasing system, transmembrane protein, LolC/E family OS=Escherichia coli (strain B / BL21-DE3) OX=469008 GN=lolC PE=3 SV=1	FALSE	TRUE	FALSE	10.0251	3	3	3	1.03766e+08	4.49
High	A0A140N735	Shikimate dehydrogenase (NADP(+)) OS=Escherichia coli (strain B / BL21-DE3) OX=469008 GN=aroE PE=3 SV=1	FALSE	TRUE	FALSE	19.8529	4	5	4	1.18872e+08	3.81
High	A0A140N8Q7	ABC transporter substrate-binding protein OS=Escherichia coli (strain B / BL21-DE3) OX=469008 GN=ECBD_0923 PE=4 SV=1	FALSE	TRUE	FALSE	12.0253	4	4	4	4.49996e+07	6.98
High	A0A140NAD5	NAD-dependent epimerase/dehydratase OS=Escherichia coli (strain B / BL21-DE3) OX=469008 GN=ECBD_1641 PE=4 SV=1	FALSE	TRUE	FALSE	12.7737	3	5	3	1.71732e+08	7.16
High	A0A140NF56	Class I chromate reductase YieF OS=Escherichia coli (strain B / BL21-DE3) OX=469008 GN=yieF PE=4 SV=1	FALSE	TRUE	FALSE	34.5745	4	4	4	1.09089e+08	8.17
High	A0A140NF36	Lactate utilization protein C OS=Escherichia coli (strain B / BL21-DE3) OX=469008 GN=ECBD_3349 PE=4 SV=1	FALSE	TRUE	FALSE	29.0043	4	5	4	3.71008e+07	9.58
High	A0A140NFI2	Rho-binding antiterminator OS=Escherichia coli (strain B / BL21-DE3) OX=469008 GN=rof PE=4 SV=1	FALSE	TRUE	FALSE	37.2093	2	3	2	1.57519e+08	8.6
High	A0A140N8J0	PTS fructose transporter subunit IIBC OS=Escherichia coli (strain B / BL21-DE3) OX=469008 GN=fruA PE=4 SV=1	FALSE	TRUE	FALSE	7.81528	3	5	3	7.95429e+07	4.29
High	A0A140N8D2	Peptidase M48 Ste24p OS=Escherichia coli (strain B / BL21-DE3) OX=469008 GN=ECBD_0802 PE=3 SV=1	FALSE	TRUE	FALSE	27.7778	4	4	4	1.9334e+08	7.37
High	A0A140N8W5	1-(5-phosphoribosyl)-5-[(5-phosphoribosylamino)methylideneamino] imidazole-4-carboxamide isomerase OS=Escherichia coli (strain B / BL21-DE3) OX=469008 GN=hisA PE=3 SV=1	FALSE	TRUE	FALSE	23.6735	3	3	3	7.66008e+07	4.91
High	A0A140NC31	Succinate dehydrogenase cytochrome b556 subunit OS=Escherichia coli (strain B / BL21-DE3) OX=469008 GN=sdhC PE=3 SV=1	FALSE	TRUE	FALSE	17.9104	2	4	2	1.235e+08	9.9
High	A0A140NBW4	Riboflavin synthase OS=Escherichia coli (strain B / BL21-DE3) OX=469008 GN=ribE PE=4 SV=1	FALSE	TRUE	FALSE	19.2488	3	4	3	1.99917e+08	10.3
High	A0A140N7A6	DUF883 domain-containing protein OS=Escherichia coli (strain B / BL21-DE3) OX=469008 GN=ECBD_1047 PE=3 SV=1	FALSE	TRUE	FALSE	22.9358	2	3	2	3.30334e+08	5.32
High	A0A140SS82	UDP-N-acetylenolpyruvoylglucosamine reductase OS=Escherichia coli (strain B / BL21-DE3) OX=469008 GN=murB PE=3 SV=1	FALSE	TRUE	FALSE	16.0819	4	4	4	4.90723e+07	5.81
High	A0A140NFA2	6-N-hydroxylaminopurine resistance protein OS=Escherichia coli (strain B / BL21-DE3) OX=469008 GN=yiiM PE=4 SV=1	FALSE	TRUE	FALSE	29.0179	5	6	5	1.07434e+08	4.44
High	A0A140NC38	Alpha/beta hydrolase fold protein OS=Escherichia coli (strain B / BL21-DE3) OX=469008 GN=ybfF PE=4 SV=1	FALSE	TRUE	FALSE	22.8346	5	5	5	7.66054e+07	0
High	A0A140N421	Ribosomal RNA large subunit methyltransferase J OS=Escherichia coli (strain B / BL21-DE3) OX=469008 GN=rlmJ PE=3 SV=1	FALSE	TRUE	FALSE	16.7857	4	4	4	1.07785e+08	2.85
High	A0A140NFD1	DeoR/GlpR transcriptional regulator OS=Escherichia coli (strain B / BL21-DE3) OX=469008 GN=ECBD_4143 PE=4 SV=1	FALSE	TRUE	FALSE	14.9425	3	4	3	1.47241e+08	10.73
High	A0A140NBR4	Chromosome partition protein MukB OS=Escherichia coli (strain B / BL21-DE3) OX=469008 GN=mukB PE=3 SV=1	FALSE	TRUE	FALSE	4.91252	4	5	4	2.07238e+07	12.93
High	A0A140N831	Beta-glucosidase BglX OS=Escherichia coli (strain B / BL21-DE3) OX=469008 GN=bglX PE=3 SV=1	FALSE	TRUE	FALSE	8.36601	4	5	4	1.0171e+07	9.15
High	A0A140NBC4	Outer-membrane lipoprotein carrier protein OS=Escherichia coli (strain B / BL21-DE3) OX=469008 GN=lolA PE=3 SV=1	FALSE	TRUE	FALSE	31.0345	4	4	4	4.99486e+07	4.37
High	A0A140NAX0	O-acetyl-ADP-ribose deacetylase OS=Escherichia coli (strain B / BL21-DE3) OX=469008 GN=ymdB PE=3 SV=1	FALSE	TRUE	FALSE	28.2486	3	3	3	5.15857e+07	5.16
High	A0A140ND34	Release factor glutamine methyltransferase OS=Escherichia coli (strain B / BL21-DE3) OX=469008 GN=prmC PE=3 SV=1	FALSE	TRUE	FALSE	16.2455	3	3	3	2.86027e+07	6.47
High	A0A140NCN7	Probable septum site-determining protein MinC OS=Escherichia coli (strain B / BL21-DE3) OX=469008 GN=minC PE=3 SV=1	FALSE	TRUE	FALSE	22.5108	3	3	3	3.33215e+07	2.94
High	A0A140ND88	3-phosphoshikimate 1-carboxyvinyltransferase OS=Escherichia coli (strain B / BL21-DE3) OX=469008 GN=aroA PE=3 SV=1	FALSE	TRUE	FALSE	10.7728	4	4	4	7.35718e+07	6.16
High	A0A140NGL5	Type I site-specific deoxyribonuclease OS=Escherichia coli (strain B / BL21-DE3) OX=469008 GN=hsdR PE=3 SV=1	FALSE	TRUE	FALSE	5.89744	5	5	5	6.04974e+07	7.86
High	A0A140N5V0	Glucarate dehydratase OS=Escherichia coli (strain B / BL21-DE3) OX=469008 GN=gudD PE=3 SV=1	FALSE	TRUE	FALSE	14.7982	4	4	4	4.68104e+07	3.9
High	A0A140N8R4	Cell division protein ZapA OS=Escherichia coli (strain B / BL21-DE3) OX=469008 GN=zapA PE=3 SV=1	FALSE	TRUE	FALSE	25.6881	2	4	2	1.25599e+08	9.65
High	A0A140NGV4	UvrABC system protein A OS=Escherichia coli (strain B / BL21-DE3) OX=469008 GN=uvrA PE=3 SV=1	FALSE	TRUE	FALSE	9.14894	5	5	5	3.71316e+07	6.08
High	A0A140N8N5	Sugar transporter OS=Escherichia coli (strain B / BL21-DE3) OX=469008 GN=ECBD_0797 PE=3 SV=1	FALSE	TRUE	FALSE	6.25	3	5	3	3.74769e+07	10.1
High	A0A140NCR7	Recombination protein RecR OS=Escherichia coli (strain B / BL21-DE3) OX=469008 GN=recR PE=3 SV=1	FALSE	TRUE	FALSE	26.3682	2	2	2	1.251e+08	3.06
High	A0A140NDD6	1-deoxy-D-xylulose 5-phosphate reductoisomerase OS=Escherichia coli (strain B / BL21-DE3) OX=469008 GN=dxr PE=3 SV=1	FALSE	TRUE	FALSE	12.5628	3	4	3	1.69702e+07	7.67
High	A0A140NEK5	Cobalamin synthesis protein P47K OS=Escherichia coli (strain B / BL21-DE3) OX=469008 GN=yjiA PE=3 SV=1	FALSE	TRUE	FALSE	11.3208	3	3	3	2.56322e+07	5.17
High	A0A140N5W3	Alanine transaminase AlaA OS=Escherichia coli (strain B / BL21-DE3) OX=469008 GN=alaA PE=4 SV=1	FALSE	TRUE	FALSE	12.5926	5	5	5	4.02585e+07	7.25
High	A0A140NAS1	Galactitol permease IIC component OS=Escherichia coli (strain B / BL21-DE3) OX=469008 GN=ECBD_1565 PE=4 SV=1	FALSE	TRUE	FALSE	5.32151	2	4	2	2.23367e+08	4.27
High	A0A140N7X1	Probable transcriptional regulatory protein YeeN OS=Escherichia coli (strain B / BL21-DE3) OX=469008 GN=yeeN PE=3 SV=1	FALSE	TRUE	FALSE	13.8655	2	3	2	1.11345e+08	8.04
High	A0A140NBM6	Methylglyoxal synthase OS=Escherichia coli (strain B / BL21-DE3) OX=469008 GN=mgsA PE=3 SV=1	FALSE	TRUE	FALSE	21.7105	2	3	2	1.74669e+08	7.15
High	A0A140N883	Regulatory protein GntR HTH OS=Escherichia coli (strain B / BL21-DE3) OX=469008 GN=exuR PE=4 SV=1	FALSE	TRUE	FALSE	11.2403	2	3	2	1.8059e+08	3.88
High	A0A140N6E9	Outer membrane lipoprotein, Slp family OS=Escherichia coli (strain B / BL21-DE3) OX=469008 GN=yeaY PE=4 SV=1	FALSE	TRUE	FALSE	24.3523	3	4	3	6.46375e+07	6.02
High	A0A140N564	Signal recognition particle receptor FtsY OS=Escherichia coli (strain B / BL21-DE3) OX=469008 GN=ftsY PE=3 SV=1	FALSE	TRUE	FALSE	18.1087	5	5	5	6.92252e+07	9.25
High	A0A140N7T6	Tryptophan synthase beta chain OS=Escherichia coli (strain B / BL21-DE3) OX=469008 GN=trpB PE=3 SV=1	FALSE	TRUE	FALSE	15.6171	3	5	3	6.95152e+07	4.46
High	A0A140N4C9	Ribosomal RNA small subunit methyltransferase E OS=Escherichia coli (strain B / BL21-DE3) OX=469008 GN=ECBD_0794 PE=3 SV=1	FALSE	TRUE	FALSE	19.3416	3	3	3	1.43181e+07	3.63
High	A0A140N7V0	N-acetylmannosamine kinase OS=Escherichia coli (strain B / BL21-DE3) OX=469008 GN=nanK PE=3 SV=1	FALSE	TRUE	FALSE	14.0893	3	3	3	1.3302e+07	6.28
High	A0A140NEY3	Porphobilinogen deaminase OS=Escherichia coli (strain B / BL21-DE3) OX=469008 GN=hemC PE=3 SV=1	FALSE	TRUE	FALSE	18.75	4	4	4	1.53997e+08	5.15
High	A0A140NCE9	Malate synthase OS=Escherichia coli (strain B / BL21-DE3) OX=469008 GN=aceB PE=3 SV=1	FALSE	TRUE	FALSE	10.5066	4	4	4	3.11419e+07	8.2
High	A0A140N4P2	Lipopolysaccharide heptosyltransferase III OS=Escherichia coli (strain B / BL21-DE3) OX=469008 GN=ECBD_0094 PE=4 SV=1	FALSE	TRUE	FALSE	11.4706	3	3	3	2.70329e+07	2.99
High	A0A140SS61	Regulator of sigma D OS=Escherichia coli (strain B / BL21-DE3) OX=469008 GN=rsd PE=3 SV=1	FALSE	TRUE	FALSE	15.1899	2	3	2	2.86844e+07	4.11
High	A0A140NAC6	Lipid A biosynthesis lauroyltransferase OS=Escherichia coli (strain B / BL21-DE3) OX=469008 GN=lpxL PE=3 SV=1	FALSE	TRUE	FALSE	5.22876	1	3	1	1.54942e+08	5.8
High	A0A140NDK1	Membrane-bound PQQ-dependent dehydrogenase, glucose/quinate/shikimate family OS=Escherichia coli (strain B / BL21-DE3) OX=469008 GN=ECBD_3495 PE=3 SV=1	FALSE	TRUE	FALSE	6.28141	3	3	3	4.65082e+06	3.92
High	A0A140NDI9	3-methyl-2-oxobutanoate hydroxymethyltransferase OS=Escherichia coli (strain B / BL21-DE3) OX=469008 GN=panB PE=3 SV=1	FALSE	TRUE	FALSE	17.0455	3	4	3	2.73377e+08	6.78
High	A0A140N8S3	N(4)-acetylcytidine amidohydrolase OS=Escherichia coli (strain B / BL21-DE3) OX=469008 GN=ECBD_0837 PE=3 SV=1	FALSE	TRUE	FALSE	45.6311	4	4	4	5.75223e+07	7.55
High	A0A140N719	Ribosome maturation factor RimM OS=Escherichia coli (strain B / BL21-DE3) OX=469008 GN=rimM PE=3 SV=1	FALSE	TRUE	FALSE	21.978	4	4	4	1.21893e+08	6.01
High	A0A140NCM5	Pyruvate ferredoxin/flavodoxin oxidoreductase OS=Escherichia coli (strain B / BL21-DE3) OX=469008 GN=nifJ PE=3 SV=1	FALSE	TRUE	FALSE	4.17376	4	4	4	86791150	7.26
High	A0A140NBI6	Hydroxyacylglutathione hydrolase OS=Escherichia coli (strain B / BL21-DE3) OX=469008 GN=gloB PE=3 SV=1	FALSE	TRUE	FALSE	23.1076	5	5	5	1.27795e+08	4.54
High	A0A140SS47	YjbQ family protein OS=Escherichia coli (strain B / BL21-DE3) OX=469008 GN=ECBD_3976 PE=3 SV=1	FALSE	TRUE	FALSE	23.913	2	3	2	4.33526e+07	4.94
High	A0A140NC89	5-carboxymethyl-2-hydroxymuconate semialdehyde dehydrogenase OS=Escherichia coli (strain B / BL21-DE3) OX=469008 GN=hpaE PE=3 SV=1	FALSE	TRUE	FALSE	10.2459	3	4	3	5.00818e+07	7.99
High	A0A140N6R1	DNA-binding protein OS=Escherichia coli (strain B / BL21-DE3) OX=469008 GN=stpA PE=3 SV=1	FALSE	TRUE	FALSE	17.9104	2	3	2	2.91025e+08	7.62
High	A0A140N889	Holliday junction ATP-dependent DNA helicase RuvA OS=Escherichia coli (strain B / BL21-DE3) OX=469008 GN=ruvA PE=3 SV=1	FALSE	TRUE	FALSE	13.7931	3	3	3	3.46623e+07	4.84
High	A0A140NCL7	Pseudouridine synthase OS=Escherichia coli (strain B / BL21-DE3) OX=469008 GN=rluB PE=3 SV=1	FALSE	TRUE	FALSE	12.7148	3	4	3	4.656e+07	4.39
High	A0A140NGP6	Fructuronate reductase OS=Escherichia coli (strain B / BL21-DE3) OX=469008 GN=ECBD_3712 PE=4 SV=1	FALSE	TRUE	FALSE	8.64198	4	4	4	4.46328e+07	6.45
High	A0A140N7R5	Probable 4-deoxy-4-formamido-L-arabinose-phosphoundecaprenol deformylase ArnD OS=Escherichia coli (strain B / BL21-DE3) OX=469008 GN=arnD PE=3 SV=1	FALSE	TRUE	FALSE	15.5405	4	4	4	6.16622e+07	7.34
High	A0A140N908	Lytic murein transglycosylase B OS=Escherichia coli (strain B / BL21-DE3) OX=469008 GN=mltB PE=4 SV=1	FALSE	TRUE	FALSE	16.8975	3	3	3	1.7228e+08	6.48
High	A0A140N339	Ribosomal RNA small subunit methyltransferase D OS=Escherichia coli (strain B / BL21-DE3) OX=469008 GN=ECBD_0276 PE=3 SV=1	FALSE	TRUE	FALSE	22.2222	5	5	5	4.5995e+07	1.71
High	A0A140NEP4	Lysine decarboxylase OS=Escherichia coli (strain B / BL21-DE3) OX=469008 GN=cadA PE=3 SV=1	FALSE	TRUE	FALSE	7.69231	4	5	4	1.20819e+08	6.45
High	A0A140N958	Neutral zinc metallopeptidase OS=Escherichia coli (strain B / BL21-DE3) OX=469008 GN=ECBD_1214 PE=4 SV=1	FALSE	TRUE	FALSE	9.7561	2	2	2	2.16467e+07	5.08
High	A0A140NEB0	2-octaprenyl-3-methyl-6-methoxy-1,4-benzoquinol hydroxylase OS=Escherichia coli (strain B / BL21-DE3) OX=469008 GN=ubiF PE=3 SV=1	FALSE	TRUE	FALSE	15.0895	3	3	3	9.81222e+07	4.43
High	A0A140N9H6	DUF1471 domain-containing protein OS=Escherichia coli (strain B / BL21-DE3) OX=469008 GN=ECBD_2042 PE=4 SV=1	FALSE	TRUE	FALSE	11.1465	2	3	2	4.93965e+07	3.92
High	A0A140NHM2	dTDP-4-amino-4,6-dideoxygalactose transaminase OS=Escherichia coli (strain B / BL21-DE3) OX=469008 GN=wecE PE=3 SV=1	FALSE	TRUE	FALSE	13.2979	3	4	3	1.71599e+08	7.61
High	A0A140NDL1	DNA gyrase inhibitor YacG OS=Escherichia coli (strain B / BL21-DE3) OX=469008 GN=yacG PE=3 SV=1	FALSE	TRUE	FALSE	55.3846	2	3	2	2.89205e+07	4.89
High	A0A140NGM2	Entericidin EcnAB OS=Escherichia coli (strain B / BL21-DE3) OX=469008 GN=ecnB PE=3 SV=1	FALSE	TRUE	FALSE	45.8333	2	6	2	2.2793e+09	14.63
High	A0A140N7P8	Beta-glucuronidase OS=Escherichia coli (strain B / BL21-DE3) OX=469008 GN=uidA PE=3 SV=1	FALSE	TRUE	FALSE	8.29187	3	3	3	2.60021e+07	6.93
High	A0A140N727	TIGR01777 family protein OS=Escherichia coli (strain B / BL21-DE3) OX=469008 GN=ECBD_1355 PE=3 SV=1	FALSE	TRUE	FALSE	27.9461	5	6	5	8.11479e+07	8.94
High	A0A140NBR9	ABC transporter related OS=Escherichia coli (strain B / BL21-DE3) OX=469008 GN=glnQ PE=3 SV=1	FALSE	TRUE	FALSE	13.75	3	3	3	4.42273e+07	3.15
High	A0A140N7T2	tRNA pseudouridine synthase A OS=Escherichia coli (strain B / BL21-DE3) OX=469008 GN=truA PE=3 SV=1	FALSE	TRUE	FALSE	18.8889	3	4	3	1.51359e+08	5.67
High	A0A140NAY6	Cytoplasmic chaperone TorD family protein OS=Escherichia coli (strain B / BL21-DE3) OX=469008 GN=ycdY PE=4 SV=1	FALSE	TRUE	FALSE	14.1304	2	3	2	8.35091e+08	4.88
High	A0A140NFS3	DNA-binding transcriptional regulator CytR OS=Escherichia coli (strain B / BL21-DE3) OX=469008 GN=cytR PE=4 SV=1	FALSE	TRUE	FALSE	12.0235	3	3	3	5.21536e+07	4.52
High	A0A140N4W8	Extracellular solute-binding protein family 1 OS=Escherichia coli (strain B / BL21-DE3) OX=469008 GN=ugpB PE=3 SV=1	FALSE	TRUE	FALSE	9.36073	3	3	3	1.64663e+07	2.83
High	A0A140N9J3	HAD-superfamily hydrolase, subfamily IA, variant 3 OS=Escherichia coli (strain B / BL21-DE3) OX=469008 GN=hxpA PE=4 SV=1	FALSE	TRUE	FALSE	19.4444	2	2	2	71783696	4.73
High	A0A140SS90	Glycerol uptake facilitator protein GlpF OS=Escherichia coli (strain B / BL21-DE3) OX=469008 GN=glpF PE=3 SV=1	FALSE	TRUE	FALSE	7.47331	1	3	1	1.04934e+07	2.11
High	A0A140NDS5	Omega-amidase YafV OS=Escherichia coli (strain B / BL21-DE3) OX=469008 GN=yafV PE=1 SV=1	FALSE	TRUE	FALSE	15.625	3	3	3	1.73771e+07	4.81
High	A0A140NDX8	GTPase HflX OS=Escherichia coli (strain B / BL21-DE3) OX=469008 GN=hflX PE=3 SV=1	FALSE	TRUE	FALSE	13.8498	3	3	3	3.51604e+07	6.09
High	A0A140NCG9	4-diphosphocytidyl-2-C-methyl-D-erythritol kinase OS=Escherichia coli (strain B / BL21-DE3) OX=469008 GN=ispE PE=3 SV=1	FALSE	TRUE	FALSE	13.4276	2	2	2	92215749	2.59
High	A0A140NAR9	Holliday junction ATP-dependent DNA helicase RuvB OS=Escherichia coli (strain B / BL21-DE3) OX=469008 GN=ruvB PE=3 SV=1	FALSE	TRUE	FALSE	11.9048	2	2	2	4.71197e+07	1.71
High	A0A140N3K4	AsmA family protein OS=Escherichia coli (strain B / BL21-DE3) OX=469008 GN=ECBD_0069 PE=4 SV=1	FALSE	TRUE	FALSE	4.56942	2	3	2	1.23309e+08	4.51
High	A0A140NI62	ECA polysaccharide chain length modulation protein OS=Escherichia coli (strain B / BL21-DE3) OX=469008 GN=wzzE PE=3 SV=1	FALSE	TRUE	FALSE	26.1494	5	6	5	7.18414e+07	11.26
High	A0A140N9U0	Nitrate/nitrite response regulator protein NarP OS=Escherichia coli (strain B / BL21-DE3) OX=469008 GN=narP PE=4 SV=1	FALSE	TRUE	FALSE	13.4884	2	2	2	1.13805e+08	2.82
High	A0A140N3E6	Bifunctional glutamine synthetase adenylyltransferase/adenylyl-removing enzyme OS=Escherichia coli (strain B / BL21-DE3) OX=469008 GN=glnE PE=3 SV=1	FALSE	TRUE	FALSE	4.22833	3	3	3	6.78589e+06	4.3
High	A0A140NG87	Transcriptional regulator MraZ OS=Escherichia coli (strain B / BL21-DE3) OX=469008 GN=mraZ PE=3 SV=1	FALSE	TRUE	FALSE	10.5263	1	2	1	7.55506e+07	4.32
High	A0A140N5Q1	tRNA N6-adenosine threonylcarbamoyltransferase OS=Escherichia coli (strain B / BL21-DE3) OX=469008 GN=tsaD PE=3 SV=1	FALSE	TRUE	FALSE	16.6172	4	5	4	3.50965e+07	3.96
High	A0A140N6V3	N-ethylmaleimide reductase OS=Escherichia coli (strain B / BL21-DE3) OX=469008 GN=nemA PE=4 SV=1	FALSE	TRUE	FALSE	21.9178	4	4	4	5.56896e+07	3.8
High	A0A140NCX5	DNA topoisomerase 1 OS=Escherichia coli (strain B / BL21-DE3) OX=469008 GN=topA PE=3 SV=1	FALSE	TRUE	FALSE	5.20231	3	3	3	3.85322e+07	4.08
High	A0A140NCE1	30S ribosomal protein S22 OS=Escherichia coli (strain B / BL21-DE3) OX=469008 GN=sra PE=3 SV=1	FALSE	TRUE	FALSE	40	2	2	2	4.19073e+07	5.64
High	A0A140N7S3	Antibiotic biosynthesis monooxygenase OS=Escherichia coli (strain B / BL21-DE3) OX=469008 GN=ECBD_0710 PE=4 SV=1	FALSE	TRUE	FALSE	32.6923	3	4	3	2.95278e+07	6.79
High	A0A140N9F1	Long-chain fatty acid transport protein OS=Escherichia coli (strain B / BL21-DE3) OX=469008 GN=fadL PE=3 SV=1	FALSE	TRUE	FALSE	10.0897	3	4	3	1.82017e+08	8.03
High	A0A140N645	Ecotin OS=Escherichia coli (strain B / BL21-DE3) OX=469008 GN=eco PE=3 SV=1	FALSE	TRUE	FALSE	25.9259	5	5	5	1.54e+08	4.31
High	A0A140NC81	DUF3313 domain-containing protein OS=Escherichia coli (strain B / BL21-DE3) OX=469008 GN=ECBD_2209 PE=4 SV=1	FALSE	TRUE	FALSE	24.3243	3	3	3	47560127	5.94
High	A0A140ND77	3-deoxy-manno-octulosonate cytidylyltransferase OS=Escherichia coli (strain B / BL21-DE3) OX=469008 GN=kdsB PE=3 SV=1	FALSE	TRUE	FALSE	15.7258	3	3	3	1.33862e+08	7.05
High	A0A140NDY0	Cyclic pyranopterin monophosphate synthase OS=Escherichia coli (strain B / BL21-DE3) OX=469008 GN=moaC PE=3 SV=1	FALSE	TRUE	FALSE	8.07453	1	2	1	1.11824e+08	5.15
High	A0A140NE88	Ribosomal RNA small subunit methyltransferase A OS=Escherichia coli (strain B / BL21-DE3) OX=469008 GN=rsmA PE=3 SV=1	FALSE	TRUE	FALSE	24.1758	4	5	4	5.29486e+07	0
High	A0A140N3A3	ADP compounds hydrolase NudE OS=Escherichia coli (strain B / BL21-DE3) OX=469008 GN=nudE PE=4 SV=1	FALSE	TRUE	FALSE	24.1935	3	3	3	2.0834e+08	4.75
High	A0A140NFG4	UPF0337 protein YjbJ OS=Escherichia coli (strain B / BL21-DE3) OX=469008 GN=ECBD_3988 PE=3 SV=1	FALSE	TRUE	FALSE	26.087	2	3	2	3.37441e+07	7.53
High	A0A140NDM4	UPF0145 protein YbjQ OS=Escherichia coli (strain B / BL21-DE3) OX=469008 GN=ybjQ PE=3 SV=1	FALSE	TRUE	FALSE	19.6262	3	4	3	539262563	5.25
High	A0A140N460	Cell division protein FtsP OS=Escherichia coli (strain B / BL21-DE3) OX=469008 GN=ftsP PE=3 SV=1	FALSE	TRUE	FALSE	3.19149	1	2	1	2.23373e+07	5
High	A0A140N601	ADP-ribose diphosphatase OS=Escherichia coli (strain B / BL21-DE3) OX=469008 GN=nudF PE=3 SV=1	FALSE	TRUE	FALSE	19.1388	2	3	2	3.76467e+07	1.71
High	A0A140NDA9	LysR family transcriptional regulator OS=Escherichia coli (strain B / BL21-DE3) OX=469008 GN=ECBD_3416 PE=3 SV=1	FALSE	TRUE	FALSE	11.5132	3	3	3	4.27927e+07	4.24
High	A0A140NAW7	Carboxy terminal-processing peptidase OS=Escherichia coli (strain B / BL21-DE3) OX=469008 GN=prc PE=3 SV=1	FALSE	TRUE	FALSE	5.13196	3	4	3	2.557e+07	6.12
High	A0A140N5X9	Ribosomal RNA large subunit methyltransferase E OS=Escherichia coli (strain B / BL21-DE3) OX=469008 GN=rlmE PE=3 SV=1	FALSE	TRUE	FALSE	27.7512	4	4	4	8.41243e+07	2.5
High	A0A140N2L7	Ribonuclease PH OS=Escherichia coli (strain B / BL21-DE3) OX=469008 GN=rph PE=3 SV=1	FALSE	TRUE	FALSE	16.3866	2	2	2	3.05688e+08	5.39
High	A0A140NG25	Carbon starvation protein CstA OS=Escherichia coli (strain B / BL21-DE3) OX=469008 GN=btsT PE=3 SV=1	FALSE	TRUE	FALSE	4.60894	3	4	3	2.9147e+07	0
High	A0A140NCS0	D,D-heptose 1,7-bisphosphate phosphatase OS=Escherichia coli (strain B / BL21-DE3) OX=469008 GN=gmhB PE=3 SV=1	FALSE	TRUE	FALSE	21.0526	2	3	2	1.46082e+08	8.63
High	A0A140NG27	Lipoate-protein ligase A OS=Escherichia coli (strain B / BL21-DE3) OX=469008 GN=lplA PE=3 SV=1	FALSE	TRUE	FALSE	17.1598	4	4	4	1.61365e+08	6.48
High	A0A140N866	Uncharacterized Nudix hydrolase YfcD OS=Escherichia coli (strain B / BL21-DE3) OX=469008 GN=yfcD PE=3 SV=1	FALSE	TRUE	FALSE	18.8889	2	2	2	3.68469e+07	3.79
High	A0A140N738	Cell division protein FtsX OS=Escherichia coli (strain B / BL21-DE3) OX=469008 GN=ftsX PE=3 SV=1	FALSE	TRUE	FALSE	5.96591	2	3	2	9.29686e+07	3.66
High	A0A140ND79	Acyl-CoA thioesterase II OS=Escherichia coli (strain B / BL21-DE3) OX=469008 GN=tesB PE=3 SV=1	FALSE	TRUE	FALSE	7.34266	2	3	2	8.90647e+07	4.4
High	A0A140NB62	23S rRNA (Guanine(745)-N(1))-methyltransferase OS=Escherichia coli (strain B / BL21-DE3) OX=469008 GN=rlmA PE=4 SV=1	FALSE	TRUE	FALSE	12.6394	2	2	2	3.09623e+07	3.12
High	A0A140NBV2	UvrABC system protein B OS=Escherichia coli (strain B / BL21-DE3) OX=469008 GN=uvrB PE=3 SV=1	FALSE	TRUE	FALSE	8.32095	3	3	3	1.17266e+07	4.52
High	A0A140N5L4	Glutathione transferase OS=Escherichia coli (strain B / BL21-DE3) OX=469008 GN=yqjG PE=4 SV=1	FALSE	TRUE	FALSE	13.1098	3	3	3	2.18383e+07	5.54
High	A0A140N9J4	Diamine N-acetyltransferase OS=Escherichia coli (strain B / BL21-DE3) OX=469008 GN=speG PE=4 SV=1	FALSE	TRUE	FALSE	20.4301	3	3	3	3.31709e+07	4.63
High	A0A140NCA7	GTP cyclohydrolase-2 OS=Escherichia coli (strain B / BL21-DE3) OX=469008 GN=ribA PE=3 SV=1	FALSE	TRUE	FALSE	16.8367	2	2	2	9.86907e+07	4.75
High	A0A140ND50	Ribosomal RNA large subunit methyltransferase K/L OS=Escherichia coli (strain B / BL21-DE3) OX=469008 GN=rlmL PE=3 SV=1	FALSE	TRUE	FALSE	5.41311	3	3	3	25554012	5.02
High	A0A140NEJ4	Met repressor OS=Escherichia coli (strain B / BL21-DE3) OX=469008 GN=metJ PE=3 SV=1	FALSE	TRUE	FALSE	23.8095	4	4	4	6.28289e+07	2.1
High	A0A140NF74	Bifunctional aspartokinase/homoserine dehydrogenase OS=Escherichia coli (strain B / BL21-DE3) OX=469008 GN=metL PE=3 SV=1	FALSE	TRUE	FALSE	3.82716	3	3	3	1.90649e+07	4.17
High	A0A140NA02	Nucleoside permease OS=Escherichia coli (strain B / BL21-DE3) OX=469008 GN=nupC PE=3 SV=1	FALSE	TRUE	FALSE	9.25	4	4	4	9.63829e+07	3.56
High	A0A140NAR1	Beta-hexosaminidase OS=Escherichia coli (strain B / BL21-DE3) OX=469008 GN=nagZ PE=3 SV=1	FALSE	TRUE	FALSE	4.98534	2	2	2	1.64212e+07	5.01
High	A0A140NCY5	Thiamine-monophosphate kinase OS=Escherichia coli (strain B / BL21-DE3) OX=469008 GN=thiL PE=3 SV=1	FALSE	TRUE	FALSE	12.9231	2	2	2	1.23411e+08	5.24
High	A0A140N5V8	Colanic acid biosynthesis phosphomannomutase CpsG OS=Escherichia coli (strain B / BL21-DE3) OX=469008 GN=cpsG PE=3 SV=1	FALSE	TRUE	FALSE	9.03084	3	3	3	9.16345e+06	4.18
High	A0A140NCU9	SpoVR family protein OS=Escherichia coli (strain B / BL21-DE3) OX=469008 GN=ECBD_2434 PE=4 SV=1	FALSE	TRUE	FALSE	9.01961	3	3	3	17153201	7.06
High	A0A140NA12	Outer-membrane lipoprotein LolB OS=Escherichia coli (strain B / BL21-DE3) OX=469008 GN=lolB PE=3 SV=1	FALSE	TRUE	FALSE	22.2222	3	3	3	8.66364e+07	2.61
High	A0A140NFX2	Probable phosphoglycerate mutase GpmB OS=Escherichia coli (strain B / BL21-DE3) OX=469008 GN=gpmB PE=3 SV=1	FALSE	TRUE	FALSE	27.4419	5	5	5	8.76784e+07	2.45
High	A0A140N4Z4	Transcriptional regulator, DeoR family OS=Escherichia coli (strain B / BL21-DE3) OX=469008 GN=ECBD_0319 PE=4 SV=1	FALSE	TRUE	FALSE	11.5079	3	3	3	2.01082e+07	1.85
High	A0A140NCI2	DUF1471 domain-containing protein OS=Escherichia coli (strain B / BL21-DE3) OX=469008 GN=ECBD_3328 PE=4 SV=1	FALSE	TRUE	FALSE	49.4505	2	2	2	3.12532e+07	4.69
High	A0A140NCY3	Surface-exposed outer membrane lipoprotein YaiW OS=Escherichia coli (strain B / BL21-DE3) OX=469008 GN=yaiW PE=4 SV=1	FALSE	TRUE	FALSE	8.51648	3	3	3	2.42264e+07	0
High	C6EH62	Lipoprotein NlpI OS=Escherichia coli (strain B / BL21-DE3) OX=469008 GN=nlpI PE=3 SV=1	FALSE	TRUE	FALSE	4.7619	1	2	1	6.5604e+07	0
High	A0A140NG64	Diaminopimelate epimerase OS=Escherichia coli (strain B / BL21-DE3) OX=469008 GN=dapF PE=3 SV=1	FALSE	TRUE	FALSE	8.39416	2	2	2	8.36284e+06	2.97
High	A0A140NBY5	4-hydroxythreonine-4-phosphate dehydrogenase OS=Escherichia coli (strain B / BL21-DE3) OX=469008 GN=pdxA PE=3 SV=1	FALSE	TRUE	FALSE	10.0304	2	2	2	1.18793e+08	2.61
High	A0A140NGY8	Gamma-glutamylcyclotransferase family protein OS=Escherichia coli (strain B / BL21-DE3) OX=469008 GN=ECBD_3808 PE=3 SV=1	FALSE	TRUE	FALSE	22.1239	2	3	2	1.73004e+08	3.59
High	A0A140N9C0	Protein YebF OS=Escherichia coli (strain B / BL21-DE3) OX=469008 GN=yebF PE=3 SV=1	FALSE	TRUE	FALSE	38.1356	2	2	2	3.89211e+07	2.31
High	A0A140N742	Protease HtpX OS=Escherichia coli (strain B / BL21-DE3) OX=469008 GN=htpX PE=3 SV=1	FALSE	TRUE	FALSE	12.2867	2	3	2	4.01272e+08	6.48
High	A0A140NF49	Formaldehyde-responsive transcriptional repressor FrmR OS=Escherichia coli (strain B / BL21-DE3) OX=469008 GN=frmR PE=3 SV=1	FALSE	TRUE	FALSE	28.5714	2	2	2	1.17611e+08	4.08
High	A0A140N5C1	Ribosomal RNA small subunit methyltransferase B OS=Escherichia coli (strain B / BL21-DE3) OX=469008 GN=rsmB PE=3 SV=1	FALSE	TRUE	FALSE	21.6783	6	6	6	5.99135e+07	8.06
High	A0A140N5X6	NADH-quinone oxidoreductase subunit H OS=Escherichia coli (strain B / BL21-DE3) OX=469008 GN=nuoH PE=3 SV=1	FALSE	TRUE	FALSE	10.1538	3	3	3	1.72822e+08	2.54
High	A0A140N9G0	Dihydroorotate dehydrogenase (quinone) OS=Escherichia coli (strain B / BL21-DE3) OX=469008 GN=pyrD PE=3 SV=1	FALSE	TRUE	FALSE	8.63095	2	2	2	1.61674e+07	2.16
High	A0A140N7I9	Phosphoribosylformylglycinamidine synthase OS=Escherichia coli (strain B / BL21-DE3) OX=469008 GN=purL PE=3 SV=1	FALSE	TRUE	FALSE	6.56371	4	4	4	2.4151e+07	5.48
High	A0A140N8I2	DeoR/GlpR transcriptional regulator OS=Escherichia coli (strain B / BL21-DE3) OX=469008 GN=ECBD_2335 PE=4 SV=1	FALSE	TRUE	FALSE	12.0482	2	2	2	1.00178e+08	0
High	A0A140NBQ5	7-alpha-hydroxysteroid dehydrogenase OS=Escherichia coli (strain B / BL21-DE3) OX=469008 GN=hdhA PE=4 SV=1	FALSE	TRUE	FALSE	18.0392	4	4	4	3.29947e+08	3.25
High	A0A140NE83	Class I SAM-dependent methyltransferase OS=Escherichia coli (strain B / BL21-DE3) OX=469008 GN=ECBD_3732 PE=4 SV=1	FALSE	TRUE	FALSE	6.45161	1	2	1	7.71013e+07	5.18
High	A0A140NBY9	Cell envelope integrity protein TolA OS=Escherichia coli (strain B / BL21-DE3) OX=469008 GN=tolA PE=4 SV=1	FALSE	TRUE	FALSE	9.50119	3	3	3	3.8772e+07	4.6
High	A0A140NDA1	Peptidase T OS=Escherichia coli (strain B / BL21-DE3) OX=469008 GN=pepT PE=3 SV=1	FALSE	TRUE	FALSE	8.08824	3	3	3	4.95913e+06	4.48
High	A0A140N277	C4-dicarboxylate transport protein OS=Escherichia coli (strain B / BL21-DE3) OX=469008 GN=dctA PE=3 SV=1	FALSE	TRUE	FALSE	9.11215	3	4	3	1.39666e+08	4.02
High	A0A140N6Q3	Glycine betaine/L-proline ABC transporter substrate-binding protein ProX OS=Escherichia coli (strain B / BL21-DE3) OX=469008 GN=proX PE=4 SV=1	FALSE	TRUE	FALSE	5.45455	1	2	1	1.12293e+08	5.34
High	A0A140N8V8	Glycosyl transferase group 1 OS=Escherichia coli (strain B / BL21-DE3) OX=469008 GN=ECBD_1624 PE=4 SV=1	FALSE	TRUE	FALSE	14.5946	4	4	4	3.69949e+07	5.01
High	A0A140NA96	DJ-1 family protein OS=Escherichia coli (strain B / BL21-DE3) OX=469008 GN=yajL PE=4 SV=1	FALSE	TRUE	FALSE	14.2857	2	2	2	1.41791e+08	4.16
High	A0A140NBI5	Tat proofreading chaperone DmsD OS=Escherichia coli (strain B / BL21-DE3) OX=469008 GN=dmsD PE=3 SV=1	FALSE	TRUE	FALSE	19.1176	2	2	2	3.62199e+07	4.99
High	A0A140NHV7	Glucose-1-phosphatase OS=Escherichia coli (strain B / BL21-DE3) OX=469008 GN=yihX PE=4 SV=1	FALSE	TRUE	FALSE	13.5678	2	2	2	3.16104e+07	2.28
High	A0A140N5N0	GCN5-related N-acetyltransferase OS=Escherichia coli (strain B / BL21-DE3) OX=469008 GN=ECBD_0584 PE=4 SV=1	FALSE	TRUE	FALSE	27.5449	3	3	3	3.23261e+08	0
High	A0A140NBK6	Protease 4 OS=Escherichia coli (strain B / BL21-DE3) OX=469008 GN=sppA PE=3 SV=1	FALSE	TRUE	FALSE	4.85437	2	3	2	2.35608e+07	4.37
High	A0A140NHR0	FMN-binding protein MioC OS=Escherichia coli (strain B / BL21-DE3) OX=469008 GN=mioC PE=4 SV=1	FALSE	TRUE	FALSE	14.966	1	2	1	1.64436e+08	2.83
High	A0A140NAM5	Glycosyl transferase OS=Escherichia coli (strain B / BL21-DE3) OX=469008 GN=ECBD_1621 PE=4 SV=1	FALSE	TRUE	FALSE	24.1935	4	4	4	26419411	1.93
High	A0A140NBQ1	ATP-dependent RNA helicase RhlE OS=Escherichia coli (strain B / BL21-DE3) OX=469008 GN=rhlE PE=3 SV=1	FALSE	TRUE	FALSE	11.4537	3	3	3	4.48049e+07	4.01
High	A0A140ND41	Short-chain dehydrogenase/reductase SDR OS=Escherichia coli (strain B / BL21-DE3) OX=469008 GN=ECBD_3163 PE=4 SV=1	FALSE	TRUE	FALSE	8.59375	1	1	1	3.01759e+06	3.49
High	A0A140NAQ9	Carboxy-S-adenosyl-L-methionine synthase OS=Escherichia coli (strain B / BL21-DE3) OX=469008 GN=cmoA PE=3 SV=1	FALSE	TRUE	FALSE	19.8381	3	3	3	6.46832e+07	6.03
High	A0A140NFM4	Iron-sulfur cluster assembly protein CyaY OS=Escherichia coli (strain B / BL21-DE3) OX=469008 GN=cyaY PE=3 SV=1	FALSE	TRUE	FALSE	11.3208	1	2	1	1.49805e+08	5.77
High	A0A140NHQ0	Methylenetetrahydrofolate reductase OS=Escherichia coli (strain B / BL21-DE3) OX=469008 GN=metF PE=3 SV=1	FALSE	TRUE	FALSE	10.473	2	2	2	2.54223e+07	5.25
High	A0A140N8M2	CinA domain protein OS=Escherichia coli (strain B / BL21-DE3) OX=469008 GN=pncC PE=4 SV=1	FALSE	TRUE	FALSE	18.7879	2	3	2	19328945	6.87
High	A0A140NDA3	BolA family protein OS=Escherichia coli (strain B / BL21-DE3) OX=469008 GN=ECBD_3223 PE=3 SV=1	FALSE	TRUE	FALSE	15.3846	1	2	1	236793578	4.78
High	A0A140NFJ6	Quinolinate phosphoribosyltransferase [decarboxylating] OS=Escherichia coli (strain B / BL21-DE3) OX=469008 GN=nadC PE=3 SV=1	FALSE	TRUE	FALSE	21.2121	4	4	4	4.05139e+07	4.48
High	A0A140N9J2	30S ribosomal protein S12 methylthiotransferase accessory protein YcaO OS=Escherichia coli (strain B / BL21-DE3) OX=469008 GN=ECBD_2690 PE=4 SV=1	FALSE	TRUE	FALSE	7.84983	3	3	3	1.07767e+08	7
High	A0A140NFT0	Ferredoxin (flavodoxin):NADP(+) oxidoreductase OS=Escherichia coli (strain B / BL21-DE3) OX=469008 GN=fpr PE=3 SV=1	FALSE	TRUE	FALSE	22.5806	3	3	3	1.47092e+08	2.69
High	A0A140NCP4	Transcription-repair-coupling factor OS=Escherichia coli (strain B / BL21-DE3) OX=469008 GN=mfd PE=3 SV=1	FALSE	TRUE	FALSE	2.49141	3	3	2	2.78239e+07	0
High	A0A140NAQ1	Lipoprotein-releasing system ATP-binding protein LolD OS=Escherichia coli (strain B / BL21-DE3) OX=469008 GN=lolD PE=3 SV=1	FALSE	TRUE	FALSE	10.3004	2	2	2	1.50101e+08	2.91
High	A0A140NCA6	tRNA sulfurtransferase OS=Escherichia coli (strain B / BL21-DE3) OX=469008 GN=thiI PE=3 SV=1	FALSE	TRUE	FALSE	8.09129	2	2	2	1.70262e+08	0
High	A0A140ND38	L-threonine dehydratase OS=Escherichia coli (strain B / BL21-DE3) OX=469008 GN=ilvA PE=3 SV=1	FALSE	TRUE	FALSE	12.0388	4	4	4	3.71199e+07	4.06
High	A0A140NFR7	UDP-3-O-acyl-N-acetylglucosamine deacetylase OS=Escherichia coli (strain B / BL21-DE3) OX=469008 GN=lpxC PE=3 SV=1	FALSE	TRUE	FALSE	20	5	5	5	7.07694e+07	4.06
High	A0A140NDD2	O-phosphoserine phosphohydrolase OS=Escherichia coli (strain B / BL21-DE3) OX=469008 GN=serB PE=3 SV=1	FALSE	TRUE	FALSE	9.93789	3	3	3	2.25692e+07	4.2
High	A0A140N6W7	Sigma E regulatory protein, MucB/RseB OS=Escherichia coli (strain B / BL21-DE3) OX=469008 GN=rseB PE=3 SV=1	FALSE	TRUE	FALSE	13.2075	3	3	3	6.30121e+07	7.39
High	A0A140N490	Glycogen synthase OS=Escherichia coli (strain B / BL21-DE3) OX=469008 GN=glgA PE=3 SV=1	FALSE	TRUE	FALSE	5.03145	3	3	3	4.81076e+07	2.98
High	A0A140N9A7	Translational regulator CsrA OS=Escherichia coli (strain B / BL21-DE3) OX=469008 GN=csrA PE=3 SV=1	FALSE	TRUE	FALSE	29.5082	2	4	2	1.81407e+08	2.12
High	A0A140N8A9	Two component transcriptional regulator, LytTR family OS=Escherichia coli (strain B / BL21-DE3) OX=469008 GN=yehT PE=4 SV=1	FALSE	TRUE	FALSE	26.7782	3	3	3	1.55958e+07	2.26
High	A0A140SS53	Peptidase E OS=Escherichia coli (strain B / BL21-DE3) OX=469008 GN=pepE PE=3 SV=1	FALSE	TRUE	FALSE	21.3974	3	3	3	4.37693e+07	6.61
High	A0A140NDE1	23S rRNA accumulation protein YceD OS=Escherichia coli (strain B / BL21-DE3) OX=469008 GN=yceD PE=3 SV=1	FALSE	TRUE	FALSE	20.2312	3	3	3	2.09174e+07	4.57
High	A0A140N3C3	Ribosomal RNA large subunit methyltransferase G OS=Escherichia coli (strain B / BL21-DE3) OX=469008 GN=rlmG PE=3 SV=1	FALSE	TRUE	FALSE	6.61376	2	2	2	5.92637e+07	3.78
High	A0A140NAC0	Fructokinase OS=Escherichia coli (strain B / BL21-DE3) OX=469008 GN=mak PE=4 SV=1	FALSE	TRUE	FALSE	7.94702	2	2	2	1.83513e+08	4.09
High	A0A140N6L2	Lipopolysaccharide core heptose(I) kinase OS=Escherichia coli (strain B / BL21-DE3) OX=469008 GN=rfaP PE=3 SV=1	FALSE	TRUE	FALSE	9.43396	2	2	2	1.93747e+07	0
High	A0A140N7T9	Cystathionine beta-lyase OS=Escherichia coli (strain B / BL21-DE3) OX=469008 GN=metC PE=3 SV=1	FALSE	TRUE	FALSE	9.62025	2	2	2	6.41428e+07	2.21
High	A0A140NCD6	tRNA-cytidine(32) 2-sulfurtransferase OS=Escherichia coli (strain B / BL21-DE3) OX=469008 GN=ttcA PE=3 SV=1	FALSE	TRUE	FALSE	8.36013	2	2	2	16194426	1.63
High	A0A140N5H9	Putative N-acetylmannosamine-6-phosphate 2-epimerase OS=Escherichia coli (strain B / BL21-DE3) OX=469008 GN=nanE PE=3 SV=1	FALSE	TRUE	FALSE	15.2838	2	3	2	2.54975e+07	0
High	A0A140NBQ7	HAD-superfamily hydrolase, subfamily IA, variant 3 OS=Escherichia coli (strain B / BL21-DE3) OX=469008 GN=hxpB PE=4 SV=1	FALSE	TRUE	FALSE	18.4685	3	4	3	1.56458e+08	5.89
High	A0A140SS93	Carboxymethylenebutenolidase OS=Escherichia coli (strain B / BL21-DE3) OX=469008 GN=ECBD_4199 PE=4 SV=1	FALSE	TRUE	FALSE	7.0632	1	1	1	1.17656e+08	2.65
High	A0A140NDY9	Kinase inhibitor OS=Escherichia coli (strain B / BL21-DE3) OX=469008 GN=ECBD_2850 PE=4 SV=1	FALSE	TRUE	FALSE	20.8861	2	2	2		2.77
High	A0A140N7T4	DNA topoisomerase 4 subunit A OS=Escherichia coli (strain B / BL21-DE3) OX=469008 GN=parC PE=3 SV=1	FALSE	TRUE	FALSE	4.65426	2	2	2	3.98206e+07	2.19
High	A0A140NAH9	Uncharacterized protein OS=Escherichia coli (strain B / BL21-DE3) OX=469008 GN=ECBD_1571 PE=4 SV=1	FALSE	TRUE	FALSE	25.7143	2	2	2	2.58516e+07	3.33
High	A0A140N388	Glycerate 2-kinase OS=Escherichia coli (strain B / BL21-DE3) OX=469008 GN=garK PE=3 SV=1	FALSE	TRUE	FALSE	4.46194	1	1	1	1.02105e+08	2.66
High	A0A140NEL2	Bifunctional NAD(P)H-hydrate repair enzyme OS=Escherichia coli (strain B / BL21-DE3) OX=469008 GN=nnrD PE=3 SV=1	FALSE	TRUE	FALSE	7.18447	2	2	2	5.50097e+07	5.47
High	A0A140N7X8	GCN5-related N-acetyltransferase OS=Escherichia coli (strain B / BL21-DE3) OX=469008 GN=ECBD_1391 PE=4 SV=1	FALSE	TRUE	FALSE	9.80392	1	1	1	3.77685e+07	2.62
High	C5WBK5	tRNA/tmRNA (uracil-C(5))-methyltransferase OS=Escherichia coli (strain B / BL21-DE3) OX=469008 GN=trmA PE=3 SV=1	FALSE	TRUE	FALSE	15.0273	4	4	4	3.12693e+07	0
High	A0A140ND71	Macrodomain Ter protein OS=Escherichia coli (strain B / BL21-DE3) OX=469008 GN=matP PE=3 SV=1	FALSE	TRUE	FALSE	20	2	2	2	8.85835e+07	0
High	A0A140N771	ClpXP protease specificity-enhancing factor OS=Escherichia coli (strain B / BL21-DE3) OX=469008 GN=sspB PE=4 SV=1	FALSE	TRUE	FALSE	14.5455	2	2	2	86544480	4.58
High	A0A140N2Y3	Cell shape protein MreC OS=Escherichia coli (strain B / BL21-DE3) OX=469008 GN=mreC PE=3 SV=1	FALSE	TRUE	FALSE	11.1717	2	2	2	1.43359e+07	2.73
High	A0A140N7Q1	Uridine kinase OS=Escherichia coli (strain B / BL21-DE3) OX=469008 GN=udk PE=3 SV=1	FALSE	TRUE	FALSE	18.3099	3	3	3	1.10369e+08	0
High	A0A140NDX6	dTDP-glucose 4,6-dehydratase OS=Escherichia coli (strain B / BL21-DE3) OX=469008 GN=rffG PE=3 SV=1	FALSE	TRUE	FALSE	16.0563	3	3	2	1.77062e+07	5.55
High	A0A140N6Q5	SDR family oxidoreductase OS=Escherichia coli (strain B / BL21-DE3) OX=469008 GN=ECBD_0835 PE=4 SV=1	FALSE	TRUE	FALSE	12.5506	2	2	2	5.60102e+06	4.53
High	A0A140NF30	N5-carboxyaminoimidazole ribonucleotide mutase OS=Escherichia coli (strain B / BL21-DE3) OX=469008 GN=purE PE=3 SV=1	FALSE	TRUE	FALSE	20.7101	2	2	2	1.21582e+08	0
High	A0A140N7Q6	DNA-binding protein Fis OS=Escherichia coli (strain B / BL21-DE3) OX=469008 GN=fis PE=3 SV=1	FALSE	TRUE	FALSE	23.4694	1	1	1	122705364	2.75
High	A0A140N6S0	2-C-methyl-D-erythritol 2,4-cyclodiphosphate synthase OS=Escherichia coli (strain B / BL21-DE3) OX=469008 GN=ispF PE=3 SV=1	FALSE	TRUE	FALSE	19.4969	2	3	2	5.93819e+07	2.76
High	A0A140N4A2	PTS glucitol/sorbitol transporter subunit IIA OS=Escherichia coli (strain B / BL21-DE3) OX=469008 GN=srlB PE=4 SV=1	FALSE	TRUE	FALSE	36.5854	2	2	2	1.60358e+08	5.47
High	A0A140NAC5	Extracellular solute-binding protein family 5 OS=Escherichia coli (strain B / BL21-DE3) OX=469008 GN=mppA PE=3 SV=1	FALSE	TRUE	FALSE	4.84171	2	2	2	4.43618e+06	4.15
High	A0A140N7B6	GTPase Obg OS=Escherichia coli (strain B / BL21-DE3) OX=469008 GN=obg PE=3 SV=1	FALSE	TRUE	FALSE	7.4359	2	2	2	164696119	3.84
High	A0A140N621	Phosphopantetheine adenylyltransferase OS=Escherichia coli (strain B / BL21-DE3) OX=469008 GN=coaD PE=3 SV=1	FALSE	TRUE	FALSE	25.1572	2	2	2	1.07397e+08	4.57
High	A0A140N5V4	Phosphoesterase OS=Escherichia coli (strain B / BL21-DE3) OX=469008 GN=yfcE PE=3 SV=1	FALSE	TRUE	FALSE	16.9399	2	2	2	5.09124e+08	0
High	A0A140N9T9	YfcZ/YiiS family protein OS=Escherichia coli (strain B / BL21-DE3) OX=469008 GN=ECBD_1317 PE=3 SV=1	FALSE	TRUE	FALSE	13.8298	1	2	1	1261587424	1.71
High	A0A140N465	Coenzyme A biosynthesis bifunctional protein CoaBC OS=Escherichia coli (strain B / BL21-DE3) OX=469008 GN=coaBC PE=3 SV=1	FALSE	TRUE	FALSE	8.37438	2	2	2	1.21364e+08	3.88
High	A0A140NF84	Sigma factor-binding protein Crl OS=Escherichia coli (strain B / BL21-DE3) OX=469008 GN=crl PE=3 SV=1	FALSE	TRUE	FALSE	25.5639	4	4	4	1.22826e+08	3.85
High	A0A140N7G1	DnaA initiator-associating protein DiaA OS=Escherichia coli (strain B / BL21-DE3) OX=469008 GN=diaA PE=3 SV=1	FALSE	TRUE	FALSE	11.7347	1	1	1	8.71464e+07	2.99
High	A0A140NAF0	Adenosylcobalamin/alpha-ribazole phosphatase OS=Escherichia coli (strain B / BL21-DE3) OX=469008 GN=ECBD_3013 PE=4 SV=1	FALSE	TRUE	FALSE	11.33	1	1	1	8.94203e+06	3.05
High	A0A140NBM4	Bifunctional uridylyltransferase/uridylyl-removing enzyme OS=Escherichia coli (strain B / BL21-DE3) OX=469008 GN=glnD PE=3 SV=1	FALSE	TRUE	FALSE	7.19101	4	4	4	4.34921e+06	7.29
High	A0A140N8H7	RNA polymerase sigma factor RpoS OS=Escherichia coli (strain B / BL21-DE3) OX=469008 GN=rpoS PE=3 SV=1	FALSE	TRUE	FALSE	7.27273	2	2	1	43220346	2.15
High	A0A140NBY0	Pectinesterase OS=Escherichia coli (strain B / BL21-DE3) OX=469008 GN=ECBD_2910 PE=4 SV=1	FALSE	TRUE	FALSE	12.4122	2	2	2	68761867	2.93
High	A0A140NCU6	Lipoprotein OS=Escherichia coli (strain B / BL21-DE3) OX=469008 GN=ECBD_2537 PE=4 SV=1	FALSE	TRUE	FALSE	6.98925	1	3	1	2.51114e+06	5.59
High	A0A140NAU8	Ribosomal protein S5-alanine N-acetyltransferase OS=Escherichia coli (strain B / BL21-DE3) OX=469008 GN=rimJ PE=4 SV=1	FALSE	TRUE	FALSE	7.73196	1	1	1	4.51477e+07	2.53
High	A0A140N997	Asparaginase OS=Escherichia coli (strain B / BL21-DE3) OX=469008 GN=ansA PE=3 SV=1	FALSE	TRUE	FALSE	15.3846	2	2	2	7.17835e+07	2.55
High	A0A140N7M2	Co-chaperone protein HscB OS=Escherichia coli (strain B / BL21-DE3) OX=469008 GN=hscB PE=3 SV=1	FALSE	TRUE	FALSE	19.2982	2	2	2	1.58929e+07	4.26
High	A0A140NCS8	YaeQ family protein OS=Escherichia coli (strain B / BL21-DE3) OX=469008 GN=ECBD_3428 PE=4 SV=1	FALSE	TRUE	FALSE	22.0994	3	3	3	1.75107e+07	2.56
High	A0A140NBC0	DNA repair protein RadA OS=Escherichia coli (strain B / BL21-DE3) OX=469008 GN=radA PE=3 SV=1	FALSE	TRUE	FALSE	15.2174	4	4	4	5.56798e+07	9.1
High	A0A140N5S7	50S ribosomal protein L3 glutamine methyltransferase OS=Escherichia coli (strain B / BL21-DE3) OX=469008 GN=prmB PE=3 SV=1	FALSE	TRUE	FALSE	8.06452	3	3	3	8.16986e+07	4.47
High	A0A140NGD1	HTH-type transcriptional regulator TreR OS=Escherichia coli (strain B / BL21-DE3) OX=469008 GN=treR PE=4 SV=1	FALSE	TRUE	FALSE	7.30159	2	2	2	2.05239e+07	2.8
High	A0A140NGF0	YtfJ family protein OS=Escherichia coli (strain B / BL21-DE3) OX=469008 GN=ECBD_3814 PE=4 SV=1	FALSE	TRUE	FALSE	17.2973	2	2	2	8.13786e+07	0
High	A0A140NBK4	Glyoxalase/bleomycin resistance protein/dioxygenase OS=Escherichia coli (strain B / BL21-DE3) OX=469008 GN=ECBD_3432 PE=4 SV=1	FALSE	TRUE	FALSE	17.0543	1	1	1	6.79386e+07	2.51
High	A0A140NF19	Ribokinase OS=Escherichia coli (strain B / BL21-DE3) OX=469008 GN=rbsK PE=3 SV=1	FALSE	TRUE	FALSE	9.38511	2	2	2	1.88922e+07	4.27
High	A0A140SS54	Anaerobic C4-dicarboxylate transporter OS=Escherichia coli (strain B / BL21-DE3) OX=469008 GN=dcuA PE=3 SV=1	FALSE	TRUE	FALSE	3.00231	2	2	2	1.50758e+07	2.24
High	A0A140N4B4	Heat shock protein 15 OS=Escherichia coli (strain B / BL21-DE3) OX=469008 GN=ECBD_0346 PE=3 SV=1	FALSE	TRUE	FALSE	15.0376	1	1	1	55522712	2.79
High	A0A140N6V4	CDP-diacylglycerol--glycerol-3-phosphate 3-phosphatidyltransferase OS=Escherichia coli (strain B / BL21-DE3) OX=469008 GN=pgsA PE=3 SV=1	FALSE	TRUE	FALSE	9.89011	2	2	2	6.42462e+07	3.82
High	A0A140NCG3	YjaG family protein OS=Escherichia coli (strain B / BL21-DE3) OX=469008 GN=ECBD_4033 PE=4 SV=1	FALSE	TRUE	FALSE	11.7347	2	2	2	9.84996e+07	1.67
High	A0A140N7F5	50S ribosomal protein L29 OS=Escherichia coli (strain B / BL21-DE3) OX=469008 GN=rpmC PE=3 SV=1	FALSE	TRUE	FALSE	23.8095	1	2	1	1.65983e+07	4.32
High	A0A140NAY4	Aminodeoxychorismate synthase OS=Escherichia coli (strain B / BL21-DE3) OX=469008 GN=pabB PE=3 SV=1	FALSE	TRUE	FALSE	10.1545	2	2	2	6.15387e+07	2.16
High	A0A140NCA5	Ribosomal RNA large subunit methyltransferase H OS=Escherichia coli (strain B / BL21-DE3) OX=469008 GN=rlmH PE=3 SV=1	FALSE	TRUE	FALSE	18.7097	2	2	2	1.24315e+08	5.27
High	A0A140N752	Biotin carboxyl carrier protein of acetyl-CoA carboxylase OS=Escherichia coli (strain B / BL21-DE3) OX=469008 GN=accB PE=4 SV=1	FALSE	TRUE	FALSE	25.641	3	6	2	1.13671e+07	11.85
High	A0A140N8T5	DNA-binding transcriptional regulator HexR OS=Escherichia coli (strain B / BL21-DE3) OX=469008 GN=hexR PE=4 SV=1	FALSE	TRUE	FALSE	10.3806	2	2	2	2.5519e+07	1.66
High	A0A140N8E4	UPF0283 membrane protein YcjF OS=Escherichia coli (strain B / BL21-DE3) OX=469008 GN=ycjF PE=3 SV=1	FALSE	TRUE	FALSE	4.53258	1	1	1	51976248	2.92
High	A0A140N814	S-formylglutathione hydrolase OS=Escherichia coli (strain B / BL21-DE3) OX=469008 GN=yeiG PE=3 SV=1	FALSE	TRUE	FALSE	17.9856	2	2	2	8.14016e+07	2.61
High	A0A140NBK8	Glutathione S-transferase GstB OS=Escherichia coli (strain B / BL21-DE3) OX=469008 GN=gstB PE=4 SV=1	FALSE	TRUE	FALSE	17.3077	4	5	4	4.78052e+07	3.68
High	A0A140N9N4	5'-deoxynucleotidase YfbR OS=Escherichia coli (strain B / BL21-DE3) OX=469008 GN=yfbR PE=3 SV=1	FALSE	TRUE	FALSE	15.5779	3	3	3	2.71026e+07	2.17
High	A0A140N6C7	2-dehydro-3-deoxygluconokinase OS=Escherichia coli (strain B / BL21-DE3) OX=469008 GN=kdgK PE=4 SV=1	FALSE	TRUE	FALSE	9.38511	2	2	2	3.90031e+07	2.84
High	A0A140N6Z4	Hydrolase OS=Escherichia coli (strain B / BL21-DE3) OX=469008 GN=ECBD_1771 PE=4 SV=1	FALSE	TRUE	FALSE	13.2979	1	2	1	1.94897e+08	5.16
High	A0A140N9B6	Succinylornithine transaminase OS=Escherichia coli (strain B / BL21-DE3) OX=469008 GN=astC PE=3 SV=1	FALSE	TRUE	FALSE	8.37438	2	2	2	3.22325e+07	0
High	A0A140N4E7	MscS Mechanosensitive ion channel OS=Escherichia coli (strain B / BL21-DE3) OX=469008 GN=mscS PE=3 SV=1	FALSE	TRUE	FALSE	8.04196	2	2	2	1.65766e+08	2.13
High	A0A140NBB9	Flagellar L-ring protein OS=Escherichia coli (strain B / BL21-DE3) OX=469008 GN=flgH PE=3 SV=1	FALSE	TRUE	FALSE	13.1915	2	2	2	2.87437e+07	3.87
High	A0A140NGB8	Bis(5'-nucleosyl)-tetraphosphatase, symmetrical OS=Escherichia coli (strain B / BL21-DE3) OX=469008 GN=apaH PE=3 SV=1	FALSE	TRUE	FALSE	6.78571	1	1	1	1.59673e+07	3.17
High	A0A140N749	RNA polymerase sigma factor OS=Escherichia coli (strain B / BL21-DE3) OX=469008 GN=rpoE PE=3 SV=1	FALSE	TRUE	FALSE	11.5183	1	2	1	2.33444e+08	4.92
High	A0A140NGW4	tRNA-dihydrouridine(20/20a) synthase OS=Escherichia coli (strain B / BL21-DE3) OX=469008 GN=dusA PE=3 SV=1	FALSE	TRUE	FALSE	7.53623	2	2	2	1.236e+08	2.3
High	A0A140N901	L-fucose mutarotase OS=Escherichia coli (strain B / BL21-DE3) OX=469008 GN=fucU PE=3 SV=1	FALSE	TRUE	FALSE	22.8571	3	3	3	3.59508e+08	4.37
High	A0A140N8M8	Exodeoxyribonuclease I OS=Escherichia coli (strain B / BL21-DE3) OX=469008 GN=sbcB PE=4 SV=1	FALSE	TRUE	FALSE	8	3	3	3	2.45455e+07	2.9
High	A0A140NCN1	Endoribonuclease YbeY OS=Escherichia coli (strain B / BL21-DE3) OX=469008 GN=ybeY PE=3 SV=1	FALSE	TRUE	FALSE	9.67742	1	1	1	4.65181e+07	2.43
High	A0A140N9I3	Anti-sigma-E factor RseA OS=Escherichia coli (strain B / BL21-DE3) OX=469008 GN=rseA PE=3 SV=1	FALSE	TRUE	FALSE	12.037	1	1	1	5.83355e+07	3.02
High	A0A140NA63	Maltose O-acetyltransferase OS=Escherichia coli (strain B / BL21-DE3) OX=469008 GN=maa PE=3 SV=1	FALSE	TRUE	FALSE	20.2186	2	3	2	2.71804e+07	0
High	A0A140N9P2	Endolytic peptidoglycan transglycosylase RlpA OS=Escherichia coli (strain B / BL21-DE3) OX=469008 GN=rlpA PE=3 SV=1	FALSE	TRUE	FALSE	6.35359	2	2	2	1.27274e+08	3.97
High	A0A140N7K6	Ribonuclease G OS=Escherichia coli (strain B / BL21-DE3) OX=469008 GN=rng PE=3 SV=1	FALSE	TRUE	FALSE	10.6339	2	2	2	93364415	2.42
High	A0A140N8Z8	Lipid A biosynthesis myristoyltransferase OS=Escherichia coli (strain B / BL21-DE3) OX=469008 GN=lpxM PE=3 SV=1	FALSE	TRUE	FALSE	8.04954	2	2	2	2.45874e+07	2.14
High	A0A140N5P1	Transcriptional regulator EbgR OS=Escherichia coli (strain B / BL21-DE3) OX=469008 GN=ebgR PE=4 SV=1	FALSE	TRUE	FALSE	8.25688	2	2	2	1.61337e+07	4.57
High	A0A140N5E5	Cytochrome c biogenesis protein CcmG OS=Escherichia coli (strain B / BL21-DE3) OX=469008 GN=dsbE PE=3 SV=1	FALSE	TRUE	FALSE	8.10811	1	1	1	6.76385e+06	2.46
High	A0A140NCM7	5'-Nucleotidase domain protein OS=Escherichia coli (strain B / BL21-DE3) OX=469008 GN=ushA PE=3 SV=1	FALSE	TRUE	FALSE	3.63636	2	2	2	7.97873e+07	2.54
High	A0A140NGX6	Chorismate pyruvate-lyase OS=Escherichia coli (strain B / BL21-DE3) OX=469008 GN=ubiC PE=3 SV=1	FALSE	TRUE	FALSE	21.2121	2	2	2	1.51662e+08	4.08
High	A0A140NB11	DUF488 domain-containing protein OS=Escherichia coli (strain B / BL21-DE3) OX=469008 GN=ECBD_1853 PE=4 SV=1	FALSE	TRUE	FALSE	23.4783	2	2	2	3.50509e+07	3.65
High	A0A140N678	Isopentenyl-diphosphate Delta-isomerase OS=Escherichia coli (strain B / BL21-DE3) OX=469008 GN=idi PE=3 SV=1	FALSE	TRUE	FALSE	24.7253	2	2	2		2.99
High	A0A140N921	Flavodoxin OS=Escherichia coli (strain B / BL21-DE3) OX=469008 GN=ECBD_0939 PE=1 SV=1	FALSE	TRUE	FALSE	36.9128	3	3	3	1.69573e+08	7.37
High	A0A140N8C2	Glycerol-3-phosphate transporter OS=Escherichia coli (strain B / BL21-DE3) OX=469008 GN=glpT PE=3 SV=1	FALSE	TRUE	FALSE	11.5044	3	3	3	5.99793e+07	3.7
High	A0A140N231	IclR family transcriptional regulator YiaJ OS=Escherichia coli (strain B / BL21-DE3) OX=469008 GN=yiaJ PE=4 SV=1	FALSE	TRUE	FALSE	6.02837	1	1	1	53355659	0
High	A0A140N640	2,3-bisphosphoglycerate-independent phosphoglycerate mutase OS=Escherichia coli (strain B / BL21-DE3) OX=469008 GN=gpmI PE=3 SV=1	FALSE	TRUE	FALSE	11.284	3	4	3	4.37826e+08	4.23
High	A0A140N948	Uncharacterized protein OS=Escherichia coli (strain B / BL21-DE3) OX=469008 GN=ECBD_1833 PE=3 SV=1	FALSE	TRUE	FALSE	12.1739	1	2	1	119221270	2.26
High	A0A140N6L4	Imidazole glycerol phosphate synthase subunit HisF OS=Escherichia coli (strain B / BL21-DE3) OX=469008 GN=hisF PE=3 SV=1	FALSE	TRUE	FALSE	11.6279	3	4	3	8.29764e+07	1.95
High	C5W8B2	Ribosomal RNA large subunit methyltransferase M OS=Escherichia coli (strain B / BL21-DE3) OX=469008 GN=rlmM PE=3 SV=1	FALSE	TRUE	FALSE	7.10383	2	2	2	2.79021e+06	4.04
High	A0A140NFJ7	Cof-like hydrolase OS=Escherichia coli (strain B / BL21-DE3) OX=469008 GN=yigL PE=4 SV=1	FALSE	TRUE	FALSE	13.5338	3	3	3	4.90918e+07	1.75
High	A0A140N8C3	UPF0301 protein YqgE OS=Escherichia coli (strain B / BL21-DE3) OX=469008 GN=yqgE PE=3 SV=1	FALSE	TRUE	FALSE	12.7962	2	2	2	1.07784e+08	4.33
High	A0A140N7L1	Amidohydrolase OS=Escherichia coli (strain B / BL21-DE3) OX=469008 GN=abgA PE=4 SV=1	FALSE	TRUE	FALSE	9.63303	3	4	3	3.71354e+07	2.43
High	A0A140N652	UPF0149 protein YgfB OS=Escherichia coli (strain B / BL21-DE3) OX=469008 GN=ygfB PE=3 SV=1	FALSE	TRUE	FALSE	13.4021	1	1	1	694214840	3.53
High	A0A140NB95	Thioredoxin/glutathione peroxidase BtuE OS=Escherichia coli (strain B / BL21-DE3) OX=469008 GN=btuE PE=3 SV=1	FALSE	TRUE	FALSE	10.3825	1	1	1	390612657	2.28
High	A0A140N9H1	Beta-barrel assembly-enhancing protease OS=Escherichia coli (strain B / BL21-DE3) OX=469008 GN=bepA PE=3 SV=1	FALSE	TRUE	FALSE	11.499	3	3	3	2.82363e+07	5.05
High	A0A140NFW6	Sulfur carrier protein FdhD OS=Escherichia coli (strain B / BL21-DE3) OX=469008 GN=fdhD PE=3 SV=1	FALSE	TRUE	FALSE	6.13718	1	1	1	3.95318e+07	3.18
High	A0A140NAL3	Heat shock protein HslJ OS=Escherichia coli (strain B / BL21-DE3) OX=469008 GN=hslJ PE=4 SV=1	FALSE	TRUE	FALSE	8.57143	1	2	1	1.29263e+07	2.34
High	A0A140N568	Transcriptional regulator OS=Escherichia coli (strain B / BL21-DE3) OX=469008 GN=ECBD_0403 PE=4 SV=1	FALSE	TRUE	FALSE	10	3	3	3	8.25239e+07	3.66
High	A0A140N665	Lipoprotein AcfD-like protein OS=Escherichia coli (strain B / BL21-DE3) OX=469008 GN=ECBD_0765 PE=4 SV=1	FALSE	TRUE	FALSE	0.921053	1	1	1	3.05999e+06	2.99
High	A0A140N941	Molybdopterin synthase sulfurylase MoeB OS=Escherichia coli (strain B / BL21-DE3) OX=469008 GN=moeB PE=3 SV=1	FALSE	TRUE	FALSE	9.63855	2	3	2	3.80968e+07	4.19
High	A0A140N469	Glycerophosphoryl diester phosphodiesterase OS=Escherichia coli (strain B / BL21-DE3) OX=469008 GN=ECBD_0292 PE=4 SV=1	FALSE	TRUE	FALSE	4.45344	1	2	1	5.02318e+07	0
High	A0A140NBF7	Catalase OS=Escherichia coli (strain B / BL21-DE3) OX=469008 GN=katE PE=3 SV=1	FALSE	TRUE	FALSE	3.85126	3	3	3	6.34905e+06	3.4
High	A0A140N7S5	1-acyl-sn-glycerol-3-phosphate acyltransferase OS=Escherichia coli (strain B / BL21-DE3) OX=469008 GN=plsC PE=3 SV=1	FALSE	TRUE	FALSE	8.57143	1	1	1		2.81
High	A0A140N7Y7	Trans-aconitate 2-methyltransferase OS=Escherichia coli (strain B / BL21-DE3) OX=469008 GN=tam PE=3 SV=1	FALSE	TRUE	FALSE	5.95238	1	1	1	73710925	2.82
High	A0A140N5L0	FAD assembly factor SdhE OS=Escherichia coli (strain B / BL21-DE3) OX=469008 GN=sdhE PE=3 SV=1	FALSE	TRUE	FALSE	26.1364	1	1	1	65787639	3.1
High	A0A140N8K2	Peptidase M23 OS=Escherichia coli (strain B / BL21-DE3) OX=469008 GN=ECBD_0872 PE=4 SV=1	FALSE	TRUE	FALSE	5.9761	1	1	1	1.12777e+07	2.8
High	A0A140NFT3	Riboflavin biosynthesis protein OS=Escherichia coli (strain B / BL21-DE3) OX=469008 GN=ribF PE=3 SV=1	FALSE	TRUE	FALSE	12.7796	2	2	2	1.90473e+07	2.31
High	A0A140N6T6	Siroheme synthase OS=Escherichia coli (strain B / BL21-DE3) OX=469008 GN=cysG PE=3 SV=1	FALSE	TRUE	FALSE	3.50109	1	2	1	3.04185e+07	4.62
High	A0A140N4M1	tRNA (guanosine(18)-2'-O)-methyltransferase OS=Escherichia coli (strain B / BL21-DE3) OX=469008 GN=trmH PE=3 SV=1	FALSE	TRUE	FALSE	21.3974	3	3	3	5.12969e+07	4.22
High	A0A140NB26	DeoR/GlpR transcriptional regulator OS=Escherichia coli (strain B / BL21-DE3) OX=469008 GN=ECBD_1874 PE=4 SV=1	FALSE	TRUE	FALSE	7.93651	1	2	1		4.79
High	A0A140N633	NADP(+)-dependent aldehyde reductase OS=Escherichia coli (strain B / BL21-DE3) OX=469008 GN=yghA PE=4 SV=1	FALSE	TRUE	FALSE	7.48299	1	1	1		2.64
High	A0A140N2X4	Ribosomal protein L11 methyltransferase OS=Escherichia coli (strain B / BL21-DE3) OX=469008 GN=prmA PE=3 SV=1	FALSE	TRUE	FALSE	9.55631	2	2	2	1.19552e+08	1.98
High	A0A140N904	DUF5107 domain-containing protein OS=Escherichia coli (strain B / BL21-DE3) OX=469008 GN=ECBD_1135 PE=4 SV=1	FALSE	TRUE	FALSE	2.83623	2	2	2	3.71586e+07	3.28
High	A0A140NEY9	Diacylglycerol kinase OS=Escherichia coli (strain B / BL21-DE3) OX=469008 GN=dgkA PE=3 SV=1	FALSE	TRUE	FALSE	17.2131	2	2	2	1.57214e+08	0
High	A0A140NC70	Als operon DNA-binding transcriptional repressor AlsR OS=Escherichia coli (strain B / BL21-DE3) OX=469008 GN=alsR PE=4 SV=1	FALSE	TRUE	FALSE	6.08108	1	1	1		2.24
High	A0A140N6S9	Xylose isomerase OS=Escherichia coli (strain B / BL21-DE3) OX=469008 GN=xylA PE=3 SV=1	FALSE	TRUE	FALSE	5.45455	2	2	2	7.20912e+06	3.32
High	A0A140N7Q7	Two component transcriptional regulator, winged helix family OS=Escherichia coli (strain B / BL21-DE3) OX=469008 GN=rstA PE=4 SV=1	FALSE	TRUE	FALSE	11.7155	3	3	3	1.73523e+07	1.62
High	A0A140N9W1	Copper response regulator transcription factor CusR OS=Escherichia coli (strain B / BL21-DE3) OX=469008 GN=cusR PE=4 SV=1	FALSE	TRUE	FALSE	7.04846	1	1	1	1.17107e+07	0
High	A0A140NE54	UPF0250 protein YbeD OS=Escherichia coli (strain B / BL21-DE3) OX=469008 GN=ybeD PE=3 SV=1	FALSE	TRUE	FALSE	17.2414	1	2	1	2.38467e+07	2.51
High	A0A140N655	Glycine betaine/L-proline ABC transporter ATP-binding protein ProV OS=Escherichia coli (strain B / BL21-DE3) OX=469008 GN=proV PE=3 SV=1	FALSE	TRUE	FALSE	6.75	2	2	2	34730076	3.59
High	A0A140N505	Inner membrane protein YhjD OS=Escherichia coli (strain B / BL21-DE3) OX=469008 GN=yhjD PE=4 SV=1	FALSE	TRUE	FALSE	4.1543	1	1	1	8.85111e+06	2.41
High	A0A140N385	Gluconate transporter OS=Escherichia coli (strain B / BL21-DE3) OX=469008 GN=gntT PE=4 SV=1	FALSE	TRUE	FALSE	5.25114	2	2	2	1.36828e+08	0
High	A0A140N6R5	Fe-S cluster assembly ATPase SufC OS=Escherichia coli (strain B / BL21-DE3) OX=469008 GN=sufC PE=3 SV=1	FALSE	TRUE	FALSE	8.46774	2	2	2	1.2664e+07	2.38
High	A0A140NBY1	Transcriptional regulator SlyA OS=Escherichia coli (strain B / BL21-DE3) OX=469008 GN=slyA PE=3 SV=1	FALSE	TRUE	FALSE	15.2778	2	2	2	4.63544e+07	3.73
High	A0A140NDD0	Thymidylate kinase OS=Escherichia coli (strain B / BL21-DE3) OX=469008 GN=tmk PE=3 SV=1	FALSE	TRUE	FALSE	17.3709	3	3	3	3.73014e+07	2.81
High	A0A140NA53	Adenine phosphoribosyltransferase OS=Escherichia coli (strain B / BL21-DE3) OX=469008 GN=apt PE=3 SV=1	FALSE	TRUE	FALSE	20.2186	2	2	2	1.10515e+08	4.68
High	A0A140NDJ0	Ferrous-iron efflux pump FieF OS=Escherichia coli (strain B / BL21-DE3) OX=469008 GN=fieF PE=3 SV=1	FALSE	TRUE	FALSE	6.33333	1	1	1	6.85117e+07	2.95
High	A0A140N6T9	Pyridoxine/pyridoxal/pyridoxamine kinase OS=Escherichia coli (strain B / BL21-DE3) OX=469008 GN=pdxK PE=3 SV=1	FALSE	TRUE	FALSE	7.06714	2	2	2	2.69665e+07	3.91
High	A0A140N6T0	Outer membrane protein assembly factor BamE OS=Escherichia coli (strain B / BL21-DE3) OX=469008 GN=bamE PE=3 SV=1	FALSE	TRUE	FALSE	17.6991	1	2	1	3.12197e+09	3.73
High	A0A140NC75	Envelope stress response membrane protein PspB OS=Escherichia coli (strain B / BL21-DE3) OX=469008 GN=pspB PE=4 SV=1	FALSE	TRUE	FALSE	21.6216	1	1	1	98561020	2.1
High	A0A140NB50	Cell division topological specificity factor OS=Escherichia coli (strain B / BL21-DE3) OX=469008 GN=minE PE=3 SV=1	FALSE	TRUE	FALSE	25	3	3	3	5.31537e+07	1.77
High	A0A140NB96	Transcriptional regulator, LacI family OS=Escherichia coli (strain B / BL21-DE3) OX=469008 GN=ECBD_2908 PE=4 SV=1	FALSE	TRUE	FALSE	7.98898	2	2	2	8.96343e+06	4.05
High	A0A140N8S7	Cytidylate kinase OS=Escherichia coli (strain B / BL21-DE3) OX=469008 GN=cmk PE=3 SV=1	FALSE	TRUE	FALSE	7.04846	1	1	1	141318214	0
High	A0A140NBN2	CI repressor OS=Escherichia coli (strain B / BL21-DE3) OX=469008 GN=ECBD_2773 PE=4 SV=1	FALSE	TRUE	FALSE	9.52381	2	2	2	6.38856e+06	2.72
High	A0A140N7L7	ABC transporter related OS=Escherichia coli (strain B / BL21-DE3) OX=469008 GN=hisP PE=3 SV=1	FALSE	TRUE	FALSE	11.284	2	2	2	956344	0
High	A0A140N8N6	ErfK/YbiS/YcfS/YnhG family protein OS=Escherichia coli (strain B / BL21-DE3) OX=469008 GN=ldtA PE=3 SV=1	FALSE	TRUE	FALSE	7.3955	2	2	2	1.13674e+07	1.67
High	A0A140NEE9	Trp operon repressor OS=Escherichia coli (strain B / BL21-DE3) OX=469008 GN=trpR PE=3 SV=1	FALSE	TRUE	FALSE	13.8889	1	1	1	47865110	1.73
High	A0A140N754	dTTP/UTP pyrophosphatase OS=Escherichia coli (strain B / BL21-DE3) OX=469008 GN=yhdE PE=3 SV=1	FALSE	TRUE	FALSE	17.2589	2	2	2	2.82045e+07	4.52
High	A0A140N877	NiFe hydrogenase OS=Escherichia coli (strain B / BL21-DE3) OX=469008 GN=hybO PE=3 SV=1	FALSE	TRUE	FALSE	3.76344	1	1	1	57326829	2.83
High	A0A140N9T8	Glycine cleavage system transcriptional repressor OS=Escherichia coli (strain B / BL21-DE3) OX=469008 GN=ECBD_1210 PE=4 SV=1	FALSE	TRUE	FALSE	9.47368	1	1	1	5.19214e+07	2.89
High	A0A140N599	DNA topoisomerase 4 subunit B OS=Escherichia coli (strain B / BL21-DE3) OX=469008 GN=parE PE=3 SV=1	FALSE	TRUE	FALSE	4.7619	2	2	2	1.13617e+07	5.13
High	A0A140N459	PanD regulatory factor OS=Escherichia coli (strain B / BL21-DE3) OX=469008 GN=panZ PE=3 SV=1	FALSE	TRUE	FALSE	11.0236	1	1	1	1.70967e+07	2.25
High	A0A140N634	PTS glucitol/sorbitol transporter subunit IIB OS=Escherichia coli (strain B / BL21-DE3) OX=469008 GN=srlE PE=4 SV=1	FALSE	TRUE	FALSE	8.77743	2	2	2	47428300	4.61
High	A0A140NA67	Phage shock operon rhodanese PspE OS=Escherichia coli (strain B / BL21-DE3) OX=469008 GN=pspE PE=4 SV=1	FALSE	TRUE	FALSE	21.1538	1	1	1		0
High	A0A140NHI4	Phospholipase A1 OS=Escherichia coli (strain B / BL21-DE3) OX=469008 GN=pldA PE=3 SV=1	FALSE	TRUE	FALSE	5.53633	1	1	1	2.53092e+07	2.63
High	A0A140N7T3	Cell division protein ZapE OS=Escherichia coli (strain B / BL21-DE3) OX=469008 GN=zapE PE=3 SV=1	FALSE	TRUE	FALSE	5.06667	1	1	1	6.14337e+06	2.78
High	A0A140ND95	Adenine permease AdeP OS=Escherichia coli (strain B / BL21-DE3) OX=469008 GN=adeP PE=3 SV=1	FALSE	TRUE	FALSE	3.82022	1	1	1	1.91718e+07	2.67
High	A0A140N8H1	UPF0114 protein YqhA OS=Escherichia coli (strain B / BL21-DE3) OX=469008 GN=yqhA PE=3 SV=1	FALSE	TRUE	FALSE	6.09756	1	2	1	7.21064e+07	0
High	A0A140N8B9	dTDP-4-dehydrorhamnose 3,5-epimerase OS=Escherichia coli (strain B / BL21-DE3) OX=469008 GN=rfbC PE=3 SV=1	FALSE	TRUE	FALSE	8.28729	1	1	1	8.43401e+06	2.08
High	A0A140N7V1	4Fe-4S ferredoxin iron-sulfur binding domain protein OS=Escherichia coli (strain B / BL21-DE3) OX=469008 GN=hybA PE=4 SV=1	FALSE	TRUE	FALSE	8.23171	2	2	2	4.26304e+06	2.07
High	A0A140N5S6	3',5'-cyclic adenosine monophosphate phosphodiesterase CpdA OS=Escherichia coli (strain B / BL21-DE3) OX=469008 GN=cpdA PE=3 SV=1	FALSE	TRUE	FALSE	15.6364	2	2	2	7.18244e+07	1.84
High	A0A140NB10	Gfo/Idh/MocA family oxidoreductase OS=Escherichia coli (strain B / BL21-DE3) OX=469008 GN=ECBD_2532 PE=4 SV=1	FALSE	TRUE	FALSE	9.12052	2	2	2	1.74065e+07	2.19
High	A0A140N5N9	Trk system potassium uptake protein TrkA OS=Escherichia coli (strain B / BL21-DE3) OX=469008 GN=trkA PE=4 SV=1	FALSE	TRUE	FALSE	12.2271	3	3	3	2.59246e+07	2.36
High	A0A140NBD2	DUF1480 family protein OS=Escherichia coli (strain B / BL21-DE3) OX=469008 GN=ECBD_1804 PE=4 SV=1	FALSE	TRUE	FALSE	24.359	1	1	1	583185090	3.1
High	A0A140NES2	7-cyano-7-deazaguanine synthase OS=Escherichia coli (strain B / BL21-DE3) OX=469008 GN=queC PE=3 SV=1	FALSE	TRUE	FALSE	13.8528	2	2	2	1.55301e+08	4.3
High	A0A140N9X6	RpoE-regulated lipoprotein OS=Escherichia coli (strain B / BL21-DE3) OX=469008 GN=ECBD_1250 PE=4 SV=1	FALSE	TRUE	FALSE	20.9424	2	2	2	1.71516e+07	5.12
High	A0A140N643	HyaD/HybD family hydrogenase maturation endopeptidase OS=Escherichia coli (strain B / BL21-DE3) OX=469008 GN=ECBD_0745 PE=3 SV=1	FALSE	TRUE	FALSE	9.7561	1	1	1	68658098	2.99
High	A0A140NC43	5-oxoprolinase subunit PxpC OS=Escherichia coli (strain B / BL21-DE3) OX=469008 GN=pxpC PE=4 SV=1	FALSE	TRUE	FALSE	16.7742	3	3	3	3.66676e+07	2.68
High	A0A140NAJ0	Lipid A 1-diphosphate synthase OS=Escherichia coli (strain B / BL21-DE3) OX=469008 GN=lpxT PE=3 SV=1	FALSE	TRUE	FALSE	8.01688	2	2	2	67599255	2.33
High	A0A140NDE2	Pyrimidine/purine nucleoside phosphorylase OS=Escherichia coli (strain B / BL21-DE3) OX=469008 GN=ppnP PE=3 SV=1	FALSE	TRUE	FALSE	23.4043	2	2	2	1.33666e+08	4.41
High	A0A140N688	dITP/XTP pyrophosphatase OS=Escherichia coli (strain B / BL21-DE3) OX=469008 GN=ECBD_0786 PE=3 SV=1	FALSE	TRUE	FALSE	14.7208	3	3	3	5.08328e+07	4.91
High	A0A140NCJ1	Extracellular solute-binding protein family 5 OS=Escherichia coli (strain B / BL21-DE3) OX=469008 GN=sapA PE=3 SV=1	FALSE	TRUE	FALSE	2.55941	1	1	1	1.3931e+07	2.14
High	A0A140N3H1	Transcriptional regulator, XRE family OS=Escherichia coli (strain B / BL21-DE3) OX=469008 GN=mqsA PE=4 SV=1	FALSE	TRUE	FALSE	21.374	2	2	2	4.5579e+07	2.47
High	A0A140N9F2	Tol-Pal system protein TolR OS=Escherichia coli (strain B / BL21-DE3) OX=469008 GN=tolR PE=3 SV=1	FALSE	TRUE	FALSE	9.15493	1	1	1	131349315	2.03
High	A0A140N726	YebY family protein OS=Escherichia coli (strain B / BL21-DE3) OX=469008 GN=ECBD_1801 PE=4 SV=1	FALSE	TRUE	FALSE	15.9292	1	2	1	2.51717e+07	4.81
High	A0A140N7V5	Transcriptional regulator LrhA OS=Escherichia coli (strain B / BL21-DE3) OX=469008 GN=lrhA PE=3 SV=1	FALSE	TRUE	FALSE	4.48718	1	1	1	6.18572e+06	0
High	A0A140NBA1	Ribosome modulation factor OS=Escherichia coli (strain B / BL21-DE3) OX=469008 GN=rmf PE=2 SV=1	FALSE	TRUE	FALSE	23.6364	1	1	1	4.65949e+06	2.88
High	A0A140NFC2	Formate dehydrogenase cytochrome b556 subunit OS=Escherichia coli (strain B / BL21-DE3) OX=469008 GN=fdoI PE=3 SV=1	FALSE	TRUE	FALSE	5.6872	1	1	1	67318413	2.5
High	A0A140NDC5	N-acetylmuramoyl-L-alanine amidase AmiD OS=Escherichia coli (strain B / BL21-DE3) OX=469008 GN=amiD PE=4 SV=1	FALSE	TRUE	FALSE	6.15942	1	1	1	3.49133e+07	2.6
High	A0A140NCE7	DNA-directed RNA polymerase OS=Escherichia coli (strain B / BL21-DE3) OX=469008 GN=ECBD_2906 PE=3 SV=1	FALSE	TRUE	FALSE	2.26501	2	2	2	3.32291e+07	3.88
High	A0A140SS46	tRNA dimethylallyltransferase OS=Escherichia coli (strain B / BL21-DE3) OX=469008 GN=miaA PE=3 SV=1	FALSE	TRUE	FALSE	4.74684	1	1	1	9.62905e+07	2.32
High	A0A140N3N3	tRNA (guanine-N(7)-)-methyltransferase OS=Escherichia coli (strain B / BL21-DE3) OX=469008 GN=trmB PE=3 SV=1	FALSE	TRUE	FALSE	10.0418	2	2	2	2.99971e+07	1.92
High	A0A140N9Y8	Glucans biosynthesis protein D OS=Escherichia coli (strain B / BL21-DE3) OX=469008 GN=mdoD PE=3 SV=1	FALSE	TRUE	FALSE	4.26716	2	2	2	9.46512e+06	1.88
High	A0A140NGB3	LPS export ABC transporter permease LptG OS=Escherichia coli (strain B / BL21-DE3) OX=469008 GN=lptG PE=3 SV=1	FALSE	TRUE	FALSE	7.22222	2	2	2	7.66497e+06	2.56
High	A0A140N495	Lipoprotein OS=Escherichia coli (strain B / BL21-DE3) OX=469008 GN=nlpA PE=3 SV=1	FALSE	TRUE	FALSE	5.88235	1	1	1		2.91
High	A0A140N8Y8	NAD(P) transhydrogenase subunit beta OS=Escherichia coli (strain B / BL21-DE3) OX=469008 GN=pntB PE=3 SV=1	FALSE	TRUE	FALSE	4.54545	2	2	2	2.9603e+07	0
High	A0A140N498	Malate synthase G OS=Escherichia coli (strain B / BL21-DE3) OX=469008 GN=glcB PE=3 SV=1	FALSE	TRUE	FALSE	6.08575	3	3	3	1.08822e+07	2.45
High	A0A140NCQ5	Thymidine kinase OS=Escherichia coli (strain B / BL21-DE3) OX=469008 GN=tdk PE=3 SV=1	FALSE	TRUE	FALSE	10.2439	1	2	1	1.12127e+07	6.75
High	A0A140NBI1	Arginine ABC transporter permease ArtQ OS=Escherichia coli (strain B / BL21-DE3) OX=469008 GN=artQ PE=3 SV=1	FALSE	TRUE	FALSE	7.14286	1	1	1	1.46194e+08	0
High	A0A140ND51	Thiamine-binding periplasmic protein OS=Escherichia coli (strain B / BL21-DE3) OX=469008 GN=thiB PE=3 SV=1	FALSE	TRUE	FALSE	5.8104	1	1	1	1.60785e+07	2.42
High	A0A140NCM1	Cystathionine gamma-synthase OS=Escherichia coli (strain B / BL21-DE3) OX=469008 GN=metB PE=3 SV=1	FALSE	TRUE	FALSE	3.36788	1	1	1	112683276	2.21
High	A0A140N702	NAD(P) transhydrogenase subunit alpha OS=Escherichia coli (strain B / BL21-DE3) OX=469008 GN=pntA PE=3 SV=1	FALSE	TRUE	FALSE	6.47059	2	2	2	4.95765e+07	4.13
High	A0A140NE52	Aromatic amino acid transporter OS=Escherichia coli (strain B / BL21-DE3) OX=469008 GN=tnaB PE=3 SV=1	FALSE	TRUE	FALSE	3.37349	1	1	1	537578863	2.55
High	A0A140NHK8	Uroporphyrinogen-III synthase OS=Escherichia coli (strain B / BL21-DE3) OX=469008 GN=hemD PE=3 SV=1	FALSE	TRUE	FALSE	10.1626	2	2	2	1.3729e+07	3.79
High	A0A140N331	4'-phosphopantetheinyl transferase OS=Escherichia coli (strain B / BL21-DE3) OX=469008 GN=acpT PE=4 SV=1	FALSE	TRUE	FALSE	7.17949	1	1	1	1.04046e+07	1.84
High	A0A140NBR8	Helix-turn-helix transcriptional regulator OS=Escherichia coli (strain B / BL21-DE3) OX=469008 GN=ECBD_2112 PE=4 SV=1	FALSE	TRUE	FALSE	12.766	1	1	1	5.17868e+07	2.24
High	A0A140N7I1	Threonylcarbamoyl-AMP synthase OS=Escherichia coli (strain B / BL21-DE3) OX=469008 GN=tsaC PE=3 SV=1	FALSE	TRUE	FALSE	7.36842	1	1	1	3.13341e+06	2.84
High	A0A140N6L6	DnaA regulatory inactivator Hda OS=Escherichia coli (strain B / BL21-DE3) OX=469008 GN=hda PE=3 SV=1	FALSE	TRUE	FALSE	10.4839	2	2	2	1.14694e+07	1.71
High	A0A140NDT9	Chromosome partition protein MukF OS=Escherichia coli (strain B / BL21-DE3) OX=469008 GN=mukF PE=3 SV=1	FALSE	TRUE	FALSE	2.95455	1	1	1	27553430	2.46
High	A0A140NA29	Alanine racemase OS=Escherichia coli (strain B / BL21-DE3) OX=469008 GN=dadX PE=3 SV=1	FALSE	TRUE	FALSE	10.9551	2	2	2	2.67084e+07	4.23
High	A0A140N1Z5	tRNA (cytidine(34)-2'-O)-methyltransferase OS=Escherichia coli (strain B / BL21-DE3) OX=469008 GN=trmL PE=3 SV=1	FALSE	TRUE	FALSE	19.1083	2	2	2	1.27482e+07	2.17
High	A0A140NBC7	Chromosome partition protein MukE OS=Escherichia coli (strain B / BL21-DE3) OX=469008 GN=mukE PE=3 SV=1	FALSE	TRUE	FALSE	12.8205	2	2	2	7.49569e+07	0
High	A0A140NGF2	HlyC/CorC family transporter OS=Escherichia coli (strain B / BL21-DE3) OX=469008 GN=ECBD_3812 PE=3 SV=1	FALSE	TRUE	FALSE	2.68456	1	1	1	98107149	1.84
High	A0A140NCW6	Orotidine 5'-phosphate decarboxylase OS=Escherichia coli (strain B / BL21-DE3) OX=469008 GN=pyrF PE=3 SV=1	FALSE	TRUE	FALSE	15.8491	2	2	2	1.1201e+08	0
High	A0A140N6T1	N-acetylmuramic acid 6-phosphate etherase OS=Escherichia coli (strain B / BL21-DE3) OX=469008 GN=murQ PE=2 SV=1	FALSE	TRUE	FALSE	7.04698	1	1	1	110991931	2.25
High	A0A140NI35	Magnesium transport protein CorA OS=Escherichia coli (strain B / BL21-DE3) OX=469008 GN=corA PE=3 SV=1	FALSE	TRUE	FALSE	5.6962	2	2	2	1.26038e+07	2
High	A0A140NBD4	Cold shock-like protein CspD OS=Escherichia coli (strain B / BL21-DE3) OX=469008 GN=cspD PE=4 SV=1	FALSE	TRUE	FALSE	18.9189	1	1	1	5.88396e+07	0
High	A0A140N7P6	NADH-quinone oxidoreductase subunit L OS=Escherichia coli (strain B / BL21-DE3) OX=469008 GN=nuoL PE=1 SV=1	FALSE	TRUE	FALSE	2.12072	1	1	1	1.78442e+08	2.03
High	A0A140NGI8	DNA polymerase III subunit psi OS=Escherichia coli (strain B / BL21-DE3) OX=469008 GN=holD PE=4 SV=1	FALSE	TRUE	FALSE	16.7883	1	1	1		1.84
High	A0A140N558	Putrescine aminotransferase OS=Escherichia coli (strain B / BL21-DE3) OX=469008 GN=patA PE=3 SV=1	FALSE	TRUE	FALSE	3.2634	1	1	1	9.15082e+06	1.75
High	A0A140N7S4	p-hydroxybenzoic acid efflux pump subunit AaeA OS=Escherichia coli (strain B / BL21-DE3) OX=469008 GN=aaeA PE=2 SV=1	FALSE	TRUE	FALSE	5.48387	1	1	1	3151016	2.5
High	A0A140NDD4	Nuclease SbcCD subunit D OS=Escherichia coli (strain B / BL21-DE3) OX=469008 GN=sbcD PE=3 SV=1	FALSE	TRUE	FALSE	3.25	1	1	1		2.34
High	A0A140NH36	Bifunctional ligase/repressor BirA OS=Escherichia coli (strain B / BL21-DE3) OX=469008 GN=birA PE=3 SV=1	FALSE	TRUE	FALSE	17.134	2	2	2	1.37507e+07	5.03
High	A0A140N4V5	Intermembrane phospholipid transport system permease protein MlaE OS=Escherichia coli (strain B / BL21-DE3) OX=469008 GN=mlaE PE=3 SV=1	FALSE	TRUE	FALSE	4.61538	1	1	1	8.49773e+06	2.07
High	A0A140N936	PTS mannose transporter subunit IIC OS=Escherichia coli (strain B / BL21-DE3) OX=469008 GN=manY PE=4 SV=1	FALSE	TRUE	FALSE	4.51128	1	1	1	38830961	2.08
High	A0A140N8X8	VOC family protein OS=Escherichia coli (strain B / BL21-DE3) OX=469008 GN=ECBD_1763 PE=4 SV=1	FALSE	TRUE	FALSE	8.51064	1	1	1	4.14888e+07	2.69
High	A0A140N6J7	Phosphatidylglycerol--prolipoprotein diacylglyceryl transferase OS=Escherichia coli (strain B / BL21-DE3) OX=469008 GN=lgt PE=3 SV=1	FALSE	TRUE	FALSE	4.12371	1	1	1	6.7468e+07	2.49
High	A0A140N9N6	2Fe-2S ferredoxin OS=Escherichia coli (strain B / BL21-DE3) OX=469008 GN=fdx PE=3 SV=1	FALSE	TRUE	FALSE	10.8108	1	1	1	222095380	2.82
High	A0A140NCH5	Cu(+)/Ag(+) efflux RND transporter periplasmic adaptor subunit CusB OS=Escherichia coli (strain B / BL21-DE3) OX=469008 GN=cusB PE=3 SV=1	FALSE	TRUE	FALSE	3.6855	1	1	1	8.72014e+06	2.24
High	A0A140N3I9	Large-conductance mechanosensitive channel OS=Escherichia coli (strain B / BL21-DE3) OX=469008 GN=mscL PE=3 SV=1	FALSE	TRUE	FALSE	11.7647	2	2	2	2.55088e+07	2.29
High	A0A140NDR1	L-arabinose isomerase OS=Escherichia coli (strain B / BL21-DE3) OX=469008 GN=araA PE=3 SV=1	FALSE	TRUE	FALSE	3.6	1	1	1	60235658	2.38
High	A0A140N8P9	YgdI/YgdR family lipoprotein OS=Escherichia coli (strain B / BL21-DE3) OX=469008 GN=ECBD_0913 PE=4 SV=1	FALSE	TRUE	FALSE	26.6667	1	2	1	8.60795e+07	2.21
High	A0A140N965	DNA-binding transcriptional regulator CecR OS=Escherichia coli (strain B / BL21-DE3) OX=469008 GN=cecR PE=4 SV=1	FALSE	TRUE	FALSE	13.0045	2	2	2		3.47
High	A0A140N6P5	Beta-phosphoglucomutase family hydrolase OS=Escherichia coli (strain B / BL21-DE3) OX=469008 GN=yqaB PE=4 SV=1	FALSE	TRUE	FALSE	19.6809	2	2	2	53791711	4.35
High	A0A140NDD5	ABC transporter, CydDC cysteine exporter (CydDC-E) family, permease/ATP-binding protein CydC OS=Escherichia coli (strain B / BL21-DE3) OX=469008 GN=cydC PE=4 SV=1	FALSE	TRUE	FALSE	3.31588	1	1	1	49614772	0
High	A0A140NH17	Uroporphyrinogen decarboxylase OS=Escherichia coli (strain B / BL21-DE3) OX=469008 GN=hemE PE=3 SV=1	FALSE	TRUE	FALSE	6.49718	2	2	2	5.1853e+07	1.8
High	A0A140N8U1	Na(+)/H(+) antiporter NhaB OS=Escherichia coli (strain B / BL21-DE3) OX=469008 GN=nhaB PE=3 SV=1	FALSE	TRUE	FALSE	5.84795	2	2	2	971070	0
High	A0A140N695	PAS modulated sigma54 specific transcriptional regulator, Fis family OS=Escherichia coli (strain B / BL21-DE3) OX=469008 GN=ECBD_0868 PE=4 SV=1	FALSE	TRUE	FALSE	2.19595	1	1	1	1.41159e+06	1.62
High	A0A140NDU2	Peptidyl-prolyl cis-trans isomerase OS=Escherichia coli (strain B / BL21-DE3) OX=469008 GN=fkpB PE=3 SV=1	FALSE	TRUE	FALSE	12.0805	1	1	1	9.22131e+07	2.06
High	A0A140NEB1	Maltose/maltodextrin transport system permease protein OS=Escherichia coli (strain B / BL21-DE3) OX=469008 GN=malF PE=3 SV=1	FALSE	TRUE	FALSE	3.6965	1	1	1	2.1693e+07	2.44
High	A0A140NGZ8	NAD(P)H:quinone oxidoreductase OS=Escherichia coli (strain B / BL21-DE3) OX=469008 GN=qorB PE=4 SV=1	FALSE	TRUE	FALSE	4.1958	1	1	1	1.34932e+07	2.4
High	A0A140N8V3	Ribosomal RNA small subunit methyltransferase F OS=Escherichia coli (strain B / BL21-DE3) OX=469008 GN=rsmF PE=3 SV=1	FALSE	TRUE	FALSE	3.1185	1	2	1	4.03137e+07	1.66
High	A0A140NFW3	Homoserine kinase OS=Escherichia coli (strain B / BL21-DE3) OX=469008 GN=thrB PE=3 SV=1	FALSE	TRUE	FALSE	4.51613	1	1	1	86827809	2.26
High	A0A140N9L0	Alcohol dehydrogenase zinc-binding domain protein OS=Escherichia coli (strain B / BL21-DE3) OX=469008 GN=ECBD_1139 PE=3 SV=1	FALSE	TRUE	FALSE	4.24929	1	1	1	52081128	3.19
High	A0A140NDB8	Copper resistance lipoprotein NlpE OS=Escherichia coli (strain B / BL21-DE3) OX=469008 GN=nlpE PE=4 SV=1	FALSE	TRUE	FALSE	9.32203	1	1	1	2.06528e+07	2.56
High	A0A140N6U8	Aminodeoxychorismate synthase component 2 OS=Escherichia coli (strain B / BL21-DE3) OX=469008 GN=pabA PE=4 SV=1	FALSE	TRUE	FALSE	8.55615	1	1	1	2.36163e+07	2.04
High	A0A140NF78	Cell division protein FtsN OS=Escherichia coli (strain B / BL21-DE3) OX=469008 GN=ftsN PE=3 SV=1	FALSE	TRUE	FALSE	16.9279	2	2	2	3.50513e+06	2.69
High	A0A140N7R0	D-alanyl-D-alanine carboxypeptidase/D-alanyl-D-alanine-endopeptidase OS=Escherichia coli (strain B / BL21-DE3) OX=469008 GN=dacB PE=3 SV=1	FALSE	TRUE	FALSE	2.93501	1	1	1	4.89367e+07	2.52
High	A0A140NAD6	LacI family transcriptional regulator OS=Escherichia coli (strain B / BL21-DE3) OX=469008 GN=ECBD_2297 PE=4 SV=1	FALSE	TRUE	FALSE	5.42169	1	1	1	1.73581e+07	2.14
High	A0A140SS32	Divalent-cation tolerance protein CutA OS=Escherichia coli (strain B / BL21-DE3) OX=469008 GN=cutA PE=3 SV=1	FALSE	TRUE	FALSE	22.3214	1	1	1	6.06444e+07	2.64
High	A0A140NGR5	M42 family metallopeptidase OS=Escherichia coli (strain B / BL21-DE3) OX=469008 GN=ECBD_3733 PE=3 SV=1	FALSE	TRUE	FALSE	11.5282	2	2	2	7.30719e+07	2.57
High	A0A140N544	T-protein OS=Escherichia coli (strain B / BL21-DE3) OX=469008 GN=tyrA PE=4 SV=1	FALSE	TRUE	FALSE	5.36193	1	1	1	2.42823e+07	2.69
High	A0A140N561	Phosphoribulokinase OS=Escherichia coli (strain B / BL21-DE3) OX=469008 GN=ECBD_0393 PE=3 SV=1	FALSE	TRUE	FALSE	5.19031	1	1	1	1.21027e+06	0
High	A0A140NEE1	tRNA (cytidine/uridine-2'-O-)-methyltransferase TrmJ OS=Escherichia coli (strain B / BL21-DE3) OX=469008 GN=trmJ PE=3 SV=1	FALSE	TRUE	FALSE	6.14035	1	1	1	2.64842e+07	2.28
High	A0A140NAJ6	AsmA family protein OS=Escherichia coli (strain B / BL21-DE3) OX=469008 GN=asmA PE=4 SV=1	FALSE	TRUE	FALSE	4.86224	2	2	2	3.34551e+07	2
High	A0A140N7F1	Two component transcriptional regulator, LytTR family OS=Escherichia coli (strain B / BL21-DE3) OX=469008 GN=ypdB PE=4 SV=1	FALSE	TRUE	FALSE	8.19672	1	1	1	83357647	2.33
High	A0A140N3M9	Peptidase Do OS=Escherichia coli (strain B / BL21-DE3) OX=469008 GN=degS PE=3 SV=1	FALSE	TRUE	FALSE	7.88732	2	2	2	6.6117e+07	0
High	A0A140N6H0	Formamidopyrimidine-DNA glycosylase OS=Escherichia coli (strain B / BL21-DE3) OX=469008 GN=mutM PE=3 SV=1	FALSE	TRUE	FALSE	11.5242	1	1	1	9.99293e+07	2.7
High	A0A140N7U7	DNA-binding transcriptional regulator YqhC OS=Escherichia coli (strain B / BL21-DE3) OX=469008 GN=yqhC PE=4 SV=1	FALSE	TRUE	FALSE	5.34591	1	1	1	6010648	0
High	A0A140NCV7	Sec-independent protein translocase protein TatC OS=Escherichia coli (strain B / BL21-DE3) OX=469008 GN=tatC PE=3 SV=1	FALSE	TRUE	FALSE	6.58915	1	1	1	8.224e+06	2.47
High	A0A140NEA9	Alcohol dehydrogenase GroES domain protein OS=Escherichia coli (strain B / BL21-DE3) OX=469008 GN=ahr PE=3 SV=1	FALSE	TRUE	FALSE	4.42478	1	1	1	6.63944e+06	0
High	A0A140N7G2	PTS N-acetylgalactosamine transporter subunit IIB OS=Escherichia coli (strain B / BL21-DE3) OX=469008 GN=agaV PE=4 SV=1	FALSE	TRUE	FALSE	6.36943	1	1	1	7.65362e+06	2.83
High	A0A140NEQ7	Apolipoprotein N-acyltransferase OS=Escherichia coli (strain B / BL21-DE3) OX=469008 GN=lnt PE=3 SV=1	FALSE	TRUE	FALSE	3.51562	1	1	1	1.39303e+07	2.02
High	A0A140NEF8	Enterobacter ribonuclease OS=Escherichia coli (strain B / BL21-DE3) OX=469008 GN=rna PE=3 SV=1	FALSE	TRUE	FALSE	14.5522	2	3	2	1.28007e+08	6.53
High	A0A140NDX1	Replication-associated recombination protein A OS=Escherichia coli (strain B / BL21-DE3) OX=469008 GN=rarA PE=3 SV=1	FALSE	TRUE	FALSE	4.9217	2	3	2	1.0728e+07	2.03
High	A0A140NBG9	Pyridoxal kinase PdxY OS=Escherichia coli (strain B / BL21-DE3) OX=469008 GN=pdxY PE=3 SV=1	FALSE	TRUE	FALSE	4.1958	1	1	1	1.8161e+07	2.15
High	A0A140NEL6	5-oxoprolinase subunit PxpB OS=Escherichia coli (strain B / BL21-DE3) OX=469008 GN=pxpB PE=4 SV=1	FALSE	TRUE	FALSE	5.9633	1	1	1	1.27148e+07	2.43
High	A0A140N944	ParB domain protein nuclease OS=Escherichia coli (strain B / BL21-DE3) OX=469008 GN=ECBD_1064 PE=3 SV=1	FALSE	TRUE	FALSE	6.04027	1	1	1	1.71674e+07	2.58
High	A0A140NEA4	Siderophore enterobactin receptor FepA OS=Escherichia coli (strain B / BL21-DE3) OX=469008 GN=fepA PE=3 SV=1	FALSE	TRUE	FALSE	2.54692	1	1	1		2.36
High	A0A140ND62	CoA-binding domain protein OS=Escherichia coli (strain B / BL21-DE3) OX=469008 GN=ECBD_2629 PE=4 SV=1	FALSE	TRUE	FALSE	22.6277	1	1	1		2.85
High	A0A140NAM6	DUF2766 domain-containing protein OS=Escherichia coli (strain B / BL21-DE3) OX=469008 GN=ECBD_1738 PE=4 SV=1	FALSE	TRUE	FALSE	30.1205	2	2	2	3.69342e+07	2.05
High	A0A140N7H1	Phospholipid-binding lipoprotein MlaA OS=Escherichia coli (strain B / BL21-DE3) OX=469008 GN=mlaA PE=3 SV=1	FALSE	TRUE	FALSE	7.17131	2	2	2	2.61763e+07	0
High	A0A140NAZ7	MltA-interacting MipA family protein OS=Escherichia coli (strain B / BL21-DE3) OX=469008 GN=mipA PE=3 SV=1	FALSE	TRUE	FALSE	39.9194	4	5	4	2.57618e+07	4.57
High	A0A140N9I6	DNA-binding transcriptional repressor Mlc OS=Escherichia coli (strain B / BL21-DE3) OX=469008 GN=mlc PE=3 SV=1	FALSE	TRUE	FALSE	3.44828	1	1	1	5.15711e+07	2.25
High	A0A140NBP9	Gluconate 5-dehydrogenase OS=Escherichia coli (strain B / BL21-DE3) OX=469008 GN=idnO PE=3 SV=1	FALSE	TRUE	FALSE	11.0236	2	2	2	7.10748e+07	4.39
High	A0A140NI27	Lysophospholipase OS=Escherichia coli (strain B / BL21-DE3) OX=469008 GN=pldB PE=4 SV=1	FALSE	TRUE	FALSE	3.82353	1	1	1	7.57163e+06	0
High	A0A140NGP8	Transcriptional regulator MelR OS=Escherichia coli (strain B / BL21-DE3) OX=469008 GN=melR PE=4 SV=1	FALSE	TRUE	FALSE	4.30464	1	1	1		1.92
High	A0A140N7G6	YdcF family protein OS=Escherichia coli (strain B / BL21-DE3) OX=469008 GN=ECBD_2226 PE=4 SV=1	FALSE	TRUE	FALSE	5.6391	1	1	1	1.02247e+07	3.12
High	A0A140NEA6	Alcohol dehydrogenase zinc-binding domain protein OS=Escherichia coli (strain B / BL21-DE3) OX=469008 GN=idnD PE=4 SV=1	FALSE	TRUE	FALSE	4.08163	1	1	1	1.52226e+07	0
High	A0A140NAP0	Zinc transport protein ZntB OS=Escherichia coli (strain B / BL21-DE3) OX=469008 GN=zntB PE=3 SV=1	FALSE	TRUE	FALSE	3.0581	1	1	1	7.87392e+07	2.15
High	A0A140SS28	Elongation factor P--(R)-beta-lysine ligase OS=Escherichia coli (strain B / BL21-DE3) OX=469008 GN=epmA PE=3 SV=1	FALSE	TRUE	FALSE	4.61538	1	1	1	8.16233e+06	2.45
High	A0A140N733	2-C-methyl-D-erythritol 4-phosphate cytidylyltransferase OS=Escherichia coli (strain B / BL21-DE3) OX=469008 GN=ispD PE=3 SV=1	FALSE	TRUE	FALSE	10.5932	1	1	1	42374045	0
High	A0A140NFF5	Penicillin-binding protein 1B OS=Escherichia coli (strain B / BL21-DE3) OX=469008 GN=ECBD_3470 PE=3 SV=1	FALSE	TRUE	FALSE	2.85375	2	2	2	1.86656e+07	4.12
High	A0A140N8Z2	N-acetylmuramoyl-L-alanine amidase OS=Escherichia coli (strain B / BL21-DE3) OX=469008 GN=amiC PE=4 SV=1	FALSE	TRUE	FALSE	4.07674	1	1	1	5.78531e+07	1.95
High	A0A140NBZ1	Endonuclease III OS=Escherichia coli (strain B / BL21-DE3) OX=469008 GN=nth PE=3 SV=1	FALSE	TRUE	FALSE	6.63507	1	1	1	3.6548e+06	2.6
High	A0A140NFR9	ATP synthase subunit c OS=Escherichia coli (strain B / BL21-DE3) OX=469008 GN=atpE PE=3 SV=1	FALSE	TRUE	FALSE	11.3924	1	3	1	700075288	5.47
High	A0A140NCM4	Fatty acid metabolism regulator protein OS=Escherichia coli (strain B / BL21-DE3) OX=469008 GN=fadR PE=3 SV=1	FALSE	TRUE	FALSE	4.1841	1	1	1	8.58573e+07	2.09
High	A0A140N551	GCN5-related N-acetyltransferase OS=Escherichia coli (strain B / BL21-DE3) OX=469008 GN=pat PE=4 SV=1	FALSE	TRUE	FALSE	3.61174	2	2	2	4.66655e+06	1.75
High	A0A140NI52	UDP-N-acetyl-D-mannosaminuronic acid transferase OS=Escherichia coli (strain B / BL21-DE3) OX=469008 GN=wecG PE=3 SV=1	FALSE	TRUE	FALSE	8.53659	1	1	1		2.63
High	A0A140NFH4	Maltose operon periplasmic OS=Escherichia coli (strain B / BL21-DE3) OX=469008 GN=malM PE=4 SV=1	FALSE	TRUE	FALSE	4.90196	1	1	1		2.2
High	A0A140NFP6	Peptidylprolyl isomerase OS=Escherichia coli (strain B / BL21-DE3) OX=469008 GN=ppiC PE=4 SV=1	FALSE	TRUE	FALSE	36.5591	2	2	2	1.62221e+08	0
High	A0A140N7A4	Alcohol dehydrogenase AdhP OS=Escherichia coli (strain B / BL21-DE3) OX=469008 GN=adhP PE=3 SV=1	FALSE	TRUE	FALSE	3.27381	1	1	1	1.00187e+08	2.1
High	A0A140NDN5	DNA-binding transcriptional regulator NtrC OS=Escherichia coli (strain B / BL21-DE3) OX=469008 GN=ntrC PE=4 SV=1	FALSE	TRUE	FALSE	3.41151	1	1	1	3.91441e+06	1.82
High	A0A140N9B9	LexA family transcriptional regulator OS=Escherichia coli (strain B / BL21-DE3) OX=469008 GN=ECBD_2889 PE=4 SV=1	FALSE	TRUE	FALSE	4.62963	1	1	1	1.17828e+07	2.15
High	A0A140NBM5	Fe(3+) dicitrate transport protein FecA OS=Escherichia coli (strain B / BL21-DE3) OX=469008 GN=fecA PE=3 SV=1	FALSE	TRUE	FALSE	5.94315	2	2	2	1.18891e+08	4.57
High	A0A140NBU5	Uncharacterized protein OS=Escherichia coli (strain B / BL21-DE3) OX=469008 GN=ECBD_1961 PE=4 SV=1	FALSE	TRUE	FALSE	14.6067	1	2	1	4.86005e+07	3.89
High	A0A140N6V5	Bile acid:sodium symporter OS=Escherichia coli (strain B / BL21-DE3) OX=469008 GN=ECBD_1273 PE=4 SV=1	FALSE	TRUE	FALSE	4.81928	1	1	1	1.63049e+06	0
High	A0A140N6X1	RecBCD enzyme subunit RecD OS=Escherichia coli (strain B / BL21-DE3) OX=469008 GN=recD PE=3 SV=1	FALSE	TRUE	FALSE	2.96053	1	1	1	3.75721e+06	0
High	A0A140NAP3	L-arabinose-binding periplasmic protein OS=Escherichia coli (strain B / BL21-DE3) OX=469008 GN=araF PE=3 SV=1	FALSE	TRUE	FALSE	12.766	2	2	2	90526276	4.02
High	A0A140NGG0	TetR/AcrR family transcriptional regulator OS=Escherichia coli (strain B / BL21-DE3) OX=469008 GN=ECBD_3824 PE=4 SV=1	FALSE	TRUE	FALSE	9.76744	1	1	1	5.53894e+07	0
High	A0A140N836	Chorismate synthase OS=Escherichia coli (strain B / BL21-DE3) OX=469008 GN=aroC PE=3 SV=1	FALSE	TRUE	FALSE	5.81717	2	4	2	2.08644e+07	4.24
High	A0A140NE26	Site-specific DNA-methyltransferase (adenine-specific) OS=Escherichia coli (strain B / BL21-DE3) OX=469008 GN=hsdM PE=3 SV=1	FALSE	TRUE	FALSE	2.6465	1	1	1	7.9358e+06	2.42
High	A0A140NET7	Sec-independent protein translocase protein TatB OS=Escherichia coli (strain B / BL21-DE3) OX=469008 GN=tatB PE=3 SV=1	FALSE	TRUE	FALSE	24.5614	1	1	1	19465573	2.99
High	A0A140NDV6	DUF484 domain-containing protein OS=Escherichia coli (strain B / BL21-DE3) OX=469008 GN=ECBD_4231 PE=4 SV=1	FALSE	TRUE	FALSE	10.2128	1	1	1		2.21
High	A0A140N7D0	DNA ligase OS=Escherichia coli (strain B / BL21-DE3) OX=469008 GN=ligA PE=3 SV=1	FALSE	TRUE	FALSE	2.23547	1	1	1	6269445	1.88
High	A0A140N6V0	Hydrogenase maturation peptidase HycI OS=Escherichia coli (strain B / BL21-DE3) OX=469008 GN=hycI PE=3 SV=1	FALSE	TRUE	FALSE	12.8205	1	1	1		2.24
High	A0A140N4R0	Glutaredoxin OS=Escherichia coli (strain B / BL21-DE3) OX=469008 GN=grxC PE=3 SV=1	FALSE	TRUE	FALSE	48.1928	2	3	2	3.23063e+08	6.47
High	A0A140N6Y7	Putative two component, sigma54 specific, transcriptional regulator, Fis family OS=Escherichia coli (strain B / BL21-DE3) OX=469008 GN=glrR PE=4 SV=1	FALSE	TRUE	FALSE	2.92793	1	1	1	1.02371e+07	2.31
High	A0A140NAC3	L-rhamnonate dehydratase OS=Escherichia coli (strain B / BL21-DE3) OX=469008 GN=rhmD PE=3 SV=1	FALSE	TRUE	FALSE	2.74314	1	1	1	1.07651e+07	1.72
High	A0A140NB39	Acid phosphatase OS=Escherichia coli (strain B / BL21-DE3) OX=469008 GN=appA PE=4 SV=1	FALSE	TRUE	FALSE	4.16667	1	1	1	1.9603e+07	2.65
High	A0A140NB55	MPT synthase subunit 2 OS=Escherichia coli (strain B / BL21-DE3) OX=469008 GN=moaE PE=3 SV=1	FALSE	TRUE	FALSE	6.66667	1	1	1		2.24
High	A0A140N6V7	Uracil-DNA glycosylase OS=Escherichia coli (strain B / BL21-DE3) OX=469008 GN=ung PE=3 SV=1	FALSE	TRUE	FALSE	9.17031	2	2	2	3.07426e+07	2.38
High	A0A140NAV2	Putative GAF sensor protein OS=Escherichia coli (strain B / BL21-DE3) OX=469008 GN=ECBD_1808 PE=4 SV=1	FALSE	TRUE	FALSE	5.46448	1	1	1	7.13561e+07	2.21
High	A0A140NG37	Cysteine hydrolase OS=Escherichia coli (strain B / BL21-DE3) OX=469008 GN=ECBD_4201 PE=4 SV=1	FALSE	TRUE	FALSE	6.30631	1	1	1	24920715	2.42
High	A0A140N4V0	PTS IIA-like nitrogen-regulatory protein PtsN OS=Escherichia coli (strain B / BL21-DE3) OX=469008 GN=ptsN PE=4 SV=1	FALSE	TRUE	FALSE	6.74847	1	1	1	9.69719e+07	2.19
High	A0A140N7Y9	L-asparaginase, type II OS=Escherichia coli (strain B / BL21-DE3) OX=469008 GN=ECBD_0783 PE=3 SV=1	FALSE	TRUE	FALSE	4.5977	1	1	1	2.39548e+06	3.06
High	A0A140N7U3	YCII-related OS=Escherichia coli (strain B / BL21-DE3) OX=469008 GN=ECBD_2371 PE=3 SV=1	FALSE	TRUE	FALSE	16.3265	1	1	1	6.35155e+07	0
High	A0A140NEL4	Primosomal replication priB and priC OS=Escherichia coli (strain B / BL21-DE3) OX=469008 GN=priC PE=4 SV=1	FALSE	TRUE	FALSE	6.85714	1	1	1	7.34976e+07	0
High	A0A140NBR2	ErfK/YbiS/YcfS/YnhG family protein OS=Escherichia coli (strain B / BL21-DE3) OX=469008 GN=ldtB PE=3 SV=1	FALSE	TRUE	FALSE	16.3399	2	2	2	143971576	5.2
High	A0A140N5C8	Alpha-2-macroglobulin OS=Escherichia coli (strain B / BL21-DE3) OX=469008 GN=yfhM PE=3 SV=1	FALSE	TRUE	FALSE	0.907441	1	1	1	4.54769e+06	2.82
High	A0A140N8U6	Phospho-2-dehydro-3-deoxyheptonate aldolase OS=Escherichia coli (strain B / BL21-DE3) OX=469008 GN=aroF PE=3 SV=1	FALSE	TRUE	FALSE	3.93258	1	1	1		1.66
High	A0A140N8Y3	t(6)A37 threonylcarbamoyladenosine biosynthesis protein TsaB OS=Escherichia coli (strain B / BL21-DE3) OX=469008 GN=tsaB PE=3 SV=1	FALSE	TRUE	FALSE	5.62771	1	1	1	1.15634e+08	0
High	A0A140NBZ0	Putative sensory transduction regulator OS=Escherichia coli (strain B / BL21-DE3) OX=469008 GN=ECBD_2741 PE=4 SV=1	FALSE	TRUE	FALSE	7.59494	1	1	1	4.49359e+07	2.01
High	A0A140N4Q0	LacI family transcriptional regulator OS=Escherichia coli (strain B / BL21-DE3) OX=469008 GN=ECBD_0925 PE=4 SV=1	FALSE	TRUE	FALSE	5.12048	1	1	1	1.31382e+07	2.1
High	A0A140NBJ8	Ribosomal protein S6--L-glutamate ligase OS=Escherichia coli (strain B / BL21-DE3) OX=469008 GN=rimK PE=3 SV=1	FALSE	TRUE	FALSE	8.33333	2	2	2	5.83548e+06	1.8
High	A0A140N844	Glycine cleavage system H protein OS=Escherichia coli (strain B / BL21-DE3) OX=469008 GN=gcvH PE=3 SV=1	FALSE	TRUE	FALSE	7.75194	2	2	2	3.26929e+07	0
High	A0A140N720	Protein IscX OS=Escherichia coli (strain B / BL21-DE3) OX=469008 GN=iscX PE=3 SV=1	FALSE	TRUE	FALSE	24.2424	1	1	1	2.88431e+06	2.53
High	A0A140NAZ9	Long-chain acyl-CoA thioesterase FadM OS=Escherichia coli (strain B / BL21-DE3) OX=469008 GN=fadM PE=3 SV=1	FALSE	TRUE	FALSE	17.4242	2	2	2	2.29781e+06	1.61
High	A0A140NGY2	Soluble cytochrome b562 OS=Escherichia coli (strain B / BL21-DE3) OX=469008 GN=cybC PE=3 SV=1	FALSE	TRUE	FALSE	11.7188	1	1	1	3.41222e+06	0
High	A0A140N7S1	Ribosome maturation factor RimP OS=Escherichia coli (strain B / BL21-DE3) OX=469008 GN=rimP PE=3 SV=1	FALSE	TRUE	FALSE	12.8571	2	2	2	27169051	2.17
High	A0A140SS26	DNA mismatch repair protein MutL OS=Escherichia coli (strain B / BL21-DE3) OX=469008 GN=mutL PE=3 SV=1	FALSE	TRUE	FALSE	3.25203	1	1	1	6.99182e+06	2.49
High	A0A140N4Q7	Protein Syd OS=Escherichia coli (strain B / BL21-DE3) OX=469008 GN=syd PE=3 SV=1	FALSE	TRUE	FALSE	7.18232	1	1	1	10833395	1.88
High	A0A140NEW2	HNH endonuclease OS=Escherichia coli (strain B / BL21-DE3) OX=469008 GN=ECBD_3251 PE=4 SV=1	FALSE	TRUE	FALSE	28.6957	2	2	2	6.39275e+07	1.68
High	A0A140NCV0	Menaquinone-dependent protoporphyrinogen IX dehydrogenase OS=Escherichia coli (strain B / BL21-DE3) OX=469008 GN=hemG PE=3 SV=1	FALSE	TRUE	FALSE	11.6022	2	2	2	2.43805e+07	1.89
High	A0A140NF33	HTH-type transcriptional repressor NsrR OS=Escherichia coli (strain B / BL21-DE3) OX=469008 GN=nsrR PE=3 SV=1	FALSE	TRUE	FALSE	19.1489	2	2	2	7.56161e+07	1.94
High	A0A140NAT4	Efflux transporter, RND family, MFP subunit OS=Escherichia coli (strain B / BL21-DE3) OX=469008 GN=macA PE=3 SV=1	FALSE	TRUE	FALSE	3.2345	1	1	1	11263931	1.96
High	A0A140NEX9	Replicative DNA helicase OS=Escherichia coli (strain B / BL21-DE3) OX=469008 GN=dnaB PE=3 SV=1	FALSE	TRUE	FALSE	2.33546	1	1	1	5.08133e+06	1.71
High	A0A140NCY4	High frequency lysogenization protein HflD OS=Escherichia coli (strain B / BL21-DE3) OX=469008 GN=hflD PE=3 SV=1	FALSE	TRUE	FALSE	3.75587	1	1	1	4.57241e+06	2.02
High	A0A140N6P8	GDP-mannose pyrophosphatase NudK OS=Escherichia coli (strain B / BL21-DE3) OX=469008 GN=nudK PE=4 SV=1	FALSE	TRUE	FALSE	6.28272	1	1	1	106379160	0
High	A0A140N4Q1	Lipopolysaccharide heptosyltransferase I OS=Escherichia coli (strain B / BL21-DE3) OX=469008 GN=rfaC PE=4 SV=1	FALSE	TRUE	FALSE	3.98773	1	1	1	6.96511e+06	0
High	A0A140N6T2	M20/DapE family protein YgeY OS=Escherichia coli (strain B / BL21-DE3) OX=469008 GN=ECBD_0865 PE=4 SV=1	FALSE	TRUE	FALSE	5.45906	1	1	1	3.71504e+06	0
High	A0A140NBS9	UPF0307 protein YjgA OS=Escherichia coli (strain B / BL21-DE3) OX=469008 GN=yjgA PE=3 SV=1	FALSE	TRUE	FALSE	7.10383	1	1	1	373878483	0
High	A0A140N9W7	Amidophosphoribosyltransferase OS=Escherichia coli (strain B / BL21-DE3) OX=469008 GN=purF PE=3 SV=1	FALSE	TRUE	FALSE	7.52475	1	1	1	1.87868e+07	0
High	A0A140NAS9	7-methyl-GTP pyrophosphatase OS=Escherichia coli (strain B / BL21-DE3) OX=469008 GN=ECBD_2514 PE=3 SV=1	FALSE	TRUE	FALSE	5.7971	1	1	1	5.69282e+07	1.87
High	A0A140NAW4	ABC transporter related OS=Escherichia coli (strain B / BL21-DE3) OX=469008 GN=ECBD_3467 PE=4 SV=1	FALSE	TRUE	FALSE	5.28302	1	1	1	4.21654e+06	0
High	A0A140N4H5	Autonomous glycyl radical cofactor OS=Escherichia coli (strain B / BL21-DE3) OX=469008 GN=grcA PE=3 SV=1	FALSE	TRUE	FALSE	10.2362	1	1	1		2.52
High	A0A140NDM9	Addiction module toxin, GnsA/GnsB family OS=Escherichia coli (strain B / BL21-DE3) OX=469008 GN=ECBD_2603 PE=3 SV=1	FALSE	TRUE	FALSE	21.0526	1	1	1	1.17281e+07	0
High	A0A140N4R6	YibL family ribosome-associated protein OS=Escherichia coli (strain B / BL21-DE3) OX=469008 GN=ECBD_0125 PE=4 SV=1	FALSE	TRUE	FALSE	10.8333	1	1	1	1.25437e+07	2.02
High	A0A140NA52	Alpha/beta hydrolase OS=Escherichia coli (strain B / BL21-DE3) OX=469008 GN=ECBD_2289 PE=4 SV=1	FALSE	TRUE	FALSE	4.90196	1	1	1		1.88
High	A0A140N618	Osmotic shock tolerance protein YggT OS=Escherichia coli (strain B / BL21-DE3) OX=469008 GN=yggT PE=3 SV=1	FALSE	TRUE	FALSE	5.31915	1	1	1	150832330	1.97
High	A0A140NCZ1	Acyl-CoA thioester hydrolase YciA OS=Escherichia coli (strain B / BL21-DE3) OX=469008 GN=yciA PE=3 SV=1	FALSE	TRUE	FALSE	15.9091	1	1	1	46838510	2.08
High	A0A140N896	Pseudouridine synthase OS=Escherichia coli (strain B / BL21-DE3) OX=469008 GN=rluC PE=3 SV=1	FALSE	TRUE	FALSE	4.70219	1	1	1	9.33477e+06	2.08
High	A0A140N6U7	Pseudouridine synthase OS=Escherichia coli (strain B / BL21-DE3) OX=469008 GN=rluD PE=3 SV=1	FALSE	TRUE	FALSE	4.60123	1	1	1		1.86
High	A0A140N7T1	Succinyl-diaminopimelate desuccinylase OS=Escherichia coli (strain B / BL21-DE3) OX=469008 GN=dapE PE=3 SV=1	FALSE	TRUE	FALSE	4.53333	1	1	1	3.12561e+07	0
High	A0A140N5G5	Mannitol dehydrogenase domain protein OS=Escherichia coli (strain B / BL21-DE3) OX=469008 GN=ECBD_1485 PE=4 SV=1	FALSE	TRUE	FALSE	3.48361	1	1	1	1.66203e+08	2.07
High	A0A140NAT1	Lipid-A-disaccharide synthase OS=Escherichia coli (strain B / BL21-DE3) OX=469008 GN=lpxB PE=3 SV=1	FALSE	TRUE	FALSE	2.87958	1	1	1	2.91779e+07	2.23
High	A0A140N9Y9	Outer membrane beta-barrel protein Lom OS=Escherichia coli (strain B / BL21-DE3) OX=469008 GN=lom PE=4 SV=1	FALSE	TRUE	FALSE	8.25243	1	1	1		0
High	A0A140N8Y5	Glutaredoxin 1 OS=Escherichia coli (strain B / BL21-DE3) OX=469008 GN=grxA PE=4 SV=1	FALSE	TRUE	FALSE	18.8235	1	1	1	2.24969e+07	2.04
High	A0A140N812	DNA-binding transcriptional regulator NfeR OS=Escherichia coli (strain B / BL21-DE3) OX=469008 GN=nfeR PE=4 SV=1	FALSE	TRUE	FALSE	4.34783	1	1	1	3.40475e+06	0
High	A0A140N3S6	Iron-containing alcohol dehydrogenase OS=Escherichia coli (strain B / BL21-DE3) OX=469008 GN=yiaY PE=4 SV=1	FALSE	TRUE	FALSE	2.34987	1	1	1		1.7
High	A0A140N6C5	Two component transcriptional regulator, winged helix family OS=Escherichia coli (strain B / BL21-DE3) OX=469008 GN=qseB PE=4 SV=1	FALSE	TRUE	FALSE	8.6758	1	1	1	3.9198e+07	0
High	A0A140N6Y0	Aminotransferase class I and II OS=Escherichia coli (strain B / BL21-DE3) OX=469008 GN=malY PE=4 SV=1	FALSE	TRUE	FALSE	2.5641	1	1	1	47565758	0
High	A0A140NDX7	Multifunctional transcriptional regulator/nicotinamide-nucleotide adenylyltransferase/ribosylnicotinamide kinase NadR OS=Escherichia coli (strain B / BL21-DE3) OX=469008 GN=nadR PE=4 SV=1	FALSE	TRUE	FALSE	1.95122	1	1	1	17637308	1.72
High	A0A140N7W1	Acetyltransferase YpeA OS=Escherichia coli (strain B / BL21-DE3) OX=469008 GN=ypeA PE=3 SV=1	FALSE	TRUE	FALSE	15.6028	2	2	2	1.40257e+07	3.46
High	A0A140NFH2	Binding-protein-dependent transport systems inner membrane component OS=Escherichia coli (strain B / BL21-DE3) OX=469008 GN=metI PE=3 SV=1	FALSE	TRUE	FALSE	8.29493	1	1	1	73462592	2.68
High	A0A140N443	UPF0441 protein YgiB OS=Escherichia coli (strain B / BL21-DE3) OX=469008 GN=ygiB PE=3 SV=1	FALSE	TRUE	FALSE	17.0404	2	2	2	1.79487e+07	1.88
High	A0A140NBZ7	FMN-dependent NADH-azoreductase OS=Escherichia coli (strain B / BL21-DE3) OX=469008 GN=azoR PE=3 SV=1	FALSE	TRUE	FALSE	3.9801	1	1	1	39794816	0
High	A0A140NBS6	Lipid A export ATP-binding/permease protein MsbA OS=Escherichia coli (strain B / BL21-DE3) OX=469008 GN=msbA PE=3 SV=1	FALSE	TRUE	FALSE	1.54639	1	1	1	3.95635e+07	1.67
High	A0A140N739	Thioredoxin OS=Escherichia coli (strain B / BL21-DE3) OX=469008 GN=trxC PE=3 SV=1	FALSE	TRUE	FALSE	16.5468	2	2	2	3.70833e+07	1.71
High	A0A140ND53	Ferric uptake regulator, Fur family OS=Escherichia coli (strain B / BL21-DE3) OX=469008 GN=zur PE=3 SV=1	FALSE	TRUE	FALSE	7.60234	1	1	1	1.08882e+07	0
High	A0A140NAU3	Lysophospholipase OS=Escherichia coli (strain B / BL21-DE3) OX=469008 GN=ECBD_3162 PE=4 SV=1	FALSE	TRUE	FALSE	9.13462	1	1	1	1.90413e+06	2.62
High	A0A140N4J8	MurR/RpiR family transcriptional regulator OS=Escherichia coli (strain B / BL21-DE3) OX=469008 GN=ECBD_1121 PE=4 SV=1	FALSE	TRUE	FALSE	7.0922	1	1	1	5.65917e+06	1.9
High	A0A140NCL5	Periplasmic trehalase OS=Escherichia coli (strain B / BL21-DE3) OX=469008 GN=treA PE=3 SV=1	FALSE	TRUE	FALSE	2.65487	1	1	1	8.56227e+06	0
High	A0A140NG07	Stress response kinase A OS=Escherichia coli (strain B / BL21-DE3) OX=469008 GN=srkA PE=3 SV=1	FALSE	TRUE	FALSE	4.26829	1	1	1	1.827e+07	0
High	A0A140NEC1	DNA polymerase III subunit chi OS=Escherichia coli (strain B / BL21-DE3) OX=469008 GN=holC PE=4 SV=1	FALSE	TRUE	FALSE	8.84354	1	1	1	2.46641e+07	0
High	A0A140NEC8	DNA polymerase III subunit delta OS=Escherichia coli (strain B / BL21-DE3) OX=469008 GN=holA PE=4 SV=1	FALSE	TRUE	FALSE	4.66472	1	1	1		1.94
High	A0A140N9P6	Aldehyde Dehydrogenase OS=Escherichia coli (strain B / BL21-DE3) OX=469008 GN=sad PE=4 SV=1	FALSE	TRUE	FALSE	3.24675	1	1	1	36944043	2.57
High	A0A140N7J4	Uncharacterized protein OS=Escherichia coli (strain B / BL21-DE3) OX=469008 GN=ECBD_2258 PE=4 SV=1	FALSE	TRUE	FALSE	20	1	1	1		2.14
High	A0A140NB94	tRNA 5-carboxymethoxyuridine methyltransferase OS=Escherichia coli (strain B / BL21-DE3) OX=469008 GN=cmoM PE=3 SV=1	FALSE	TRUE	FALSE	5.36398	1	1	1	2.36603e+07	0
High	A0A140NAC1	Sugar polymerase OS=Escherichia coli (strain B / BL21-DE3) OX=469008 GN=ECBD_1622 PE=4 SV=1	FALSE	TRUE	FALSE	3.663	1	1	1	5.08878e+07	1.82
High	A0A140N769	D-malate dehydrogenase [decarboxylating] OS=Escherichia coli (strain B / BL21-DE3) OX=469008 GN=dmlA PE=3 SV=1	FALSE	TRUE	FALSE	3.87812	1	1	1	1.04294e+07	1.8
High	A0A140N5S1	D-galactonate utilization transcriptional regulator DgoR OS=Escherichia coli (strain B / BL21-DE3) OX=469008 GN=dgoR PE=4 SV=1	FALSE	TRUE	FALSE	6.11354	2	2	2	1.10092e+07	0
High	A0A140N7I7	UPF0597 protein YhaM OS=Escherichia coli (strain B / BL21-DE3) OX=469008 GN=yhaM PE=3 SV=1	FALSE	TRUE	FALSE	2.75229	1	1	1	38066374	2.1
High	A0A140NBI3	HTH-type transcriptional regulator RutR OS=Escherichia coli (strain B / BL21-DE3) OX=469008 GN=rutR PE=4 SV=1	FALSE	TRUE	FALSE	4.24528	1	1	1	1.34881e+07	0
High	A0A140N8S6	23S rRNA (uracil(1939)-C(5))-methyltransferase RlmD OS=Escherichia coli (strain B / BL21-DE3) OX=469008 GN=rlmD PE=3 SV=1	FALSE	TRUE	FALSE	3.00231	1	1	1	5.60048e+07	2.01
High	A0A140NF44	HTH-type transcriptional repressor FabR OS=Escherichia coli (strain B / BL21-DE3) OX=469008 GN=fabR PE=3 SV=1	FALSE	TRUE	FALSE	3.4188	1	1	1	4.4884e+07	1.64
High	A0A140NFG0	Ribonuclease H OS=Escherichia coli (strain B / BL21-DE3) OX=469008 GN=rnhA PE=3 SV=1	FALSE	TRUE	FALSE	7.09677	1	1	1	3.31794e+07	0
High	A0A140NB98	DUF333 domain-containing lipoprotein YoaF OS=Escherichia coli (strain B / BL21-DE3) OX=469008 GN=yoaF PE=4 SV=1	FALSE	TRUE	FALSE	16.6667	1	1	1	1.86577e+08	1.99
High	A0A140N3I1	Protein translocase subunit SecY OS=Escherichia coli (strain B / BL21-DE3) OX=469008 GN=secY PE=3 SV=1	FALSE	TRUE	FALSE	3.61174	1	2	1	3.93153e+08	2.16
High	A0A140N9K9	Helix-turn-helix domain-containing protein OS=Escherichia coli (strain B / BL21-DE3) OX=469008 GN=ECBD_2075 PE=4 SV=1	FALSE	TRUE	FALSE	6.66667	1	1	1	3.2154e+07	1.74
High	A0A140N6I9	5'/3'-nucleotidase SurE OS=Escherichia coli (strain B / BL21-DE3) OX=469008 GN=surE PE=3 SV=1	FALSE	TRUE	FALSE	5.92885	1	1	1	8.64535e+07	2.27
High	A0A140N7H8	Aga operon transcriptional regulator AgaR OS=Escherichia coli (strain B / BL21-DE3) OX=469008 GN=agaR PE=4 SV=1	FALSE	TRUE	FALSE	4.08922	1	1	1	4.58864e+06	0
High	A0A140SSC4	tRNA uridine 5-carboxymethylaminomethyl modification enzyme MnmG OS=Escherichia coli (strain B / BL21-DE3) OX=469008 GN=mnmG PE=3 SV=1	FALSE	TRUE	FALSE	1.58983	1	1	1	6.0183e+07	2.08
High	A0A140NFQ1	Co-chaperone protein DjlA OS=Escherichia coli (strain B / BL21-DE3) OX=469008 GN=djlA PE=3 SV=1	FALSE	TRUE	FALSE	2.95203	1	1	1	94007671	1.72
High	C5W716	NADH-quinone oxidoreductase subunit K OS=Escherichia coli (strain B / BL21-DE3) OX=469008 GN=nuoK PE=1 SV=1	FALSE	TRUE	FALSE	13	1	1	1	7.60935e+07	2.29
High	A0A140N6Q0	Transcription elongation factor GreB OS=Escherichia coli (strain B / BL21-DE3) OX=469008 GN=greB PE=3 SV=1	FALSE	TRUE	FALSE	13.9241	2	2	2	3.78491e+06	2.02
High	A0A140NCF6	Cell division coordinator CpoB OS=Escherichia coli (strain B / BL21-DE3) OX=469008 GN=cpoB PE=3 SV=1	FALSE	TRUE	FALSE	4.94297	1	2	1	5.61406e+07	1.86
High	A0A140NE37	Uncharacterized protein OS=Escherichia coli (strain B / BL21-DE3) OX=469008 GN=ECBD_2774 PE=4 SV=1	FALSE	TRUE	FALSE	33.3333	1	1	1	4.40649e+06	0
High	A0A140NG58	Pyruvate dehydrogenase complex transcriptional repressor PdhR OS=Escherichia coli (strain B / BL21-DE3) OX=469008 GN=pdhR PE=4 SV=1	FALSE	TRUE	FALSE	5.51181	1	1	1	1.55568e+07	2.04
High	A0A140NGQ8	Alkylphosphonate utilization operon protein PhnA OS=Escherichia coli (strain B / BL21-DE3) OX=469008 GN=ECBD_3923 PE=3 SV=1	FALSE	TRUE	FALSE	17.1171	1	1	1		1.68
High	A0A140ND85	Phosphate-specific transport system accessory protein PhoU OS=Escherichia coli (strain B / BL21-DE3) OX=469008 GN=phoU PE=3 SV=1	FALSE	TRUE	FALSE	3.3195	1	2	1	2.32262e+07	2.1
High	A0A140SS74	Pseudouridine synthase OS=Escherichia coli (strain B / BL21-DE3) OX=469008 GN=rluF PE=3 SV=1	FALSE	TRUE	FALSE	5.51724	2	2	2	4.05136e+07	0
High	A0A140NFX5	D-aminoacyl-tRNA deacylase OS=Escherichia coli (strain B / BL21-DE3) OX=469008 GN=dtd PE=3 SV=1	FALSE	TRUE	FALSE	11.7241	1	1	1	6.82216e+07	1.92
High	A0A140NBG1	Superoxide dismutase [Cu-Zn] OS=Escherichia coli (strain B / BL21-DE3) OX=469008 GN=sodC PE=3 SV=1	FALSE	TRUE	FALSE	23.6994	1	1	1	1.18741e+06	2.96
High	A0A140NCQ0	ABC transporter related OS=Escherichia coli (strain B / BL21-DE3) OX=469008 GN=ECBD_3206 PE=4 SV=1	FALSE	TRUE	FALSE	3.03541	1	1	1	1.04344e+07	2
High	A0A140NCH2	Murein tripeptide/oligopeptide ABC transporter ATP binding protein OppF OS=Escherichia coli (strain B / BL21-DE3) OX=469008 GN=oppF PE=4 SV=1	FALSE	TRUE	FALSE	2.99401	1	1	1	2.93575e+06	0
High	A0A140N6K1	Amino-acid acetyltransferase OS=Escherichia coli (strain B / BL21-DE3) OX=469008 GN=argA PE=3 SV=1	FALSE	TRUE	FALSE	1.58014	1	1	1	6956753	1.69
High	A0A140N4E8	Fructoselysine 6-phosphate deglycase OS=Escherichia coli (strain B / BL21-DE3) OX=469008 GN=frlB PE=4 SV=1	FALSE	TRUE	FALSE	3.23529	1	1	1	6.83012e+06	2.13
High	A0A140N6U4	Hydrogenase accessory protein HypB OS=Escherichia coli (strain B / BL21-DE3) OX=469008 GN=hypB PE=3 SV=1	FALSE	TRUE	FALSE	7.58621	1	1	1	8.54436e+06	2.35
High	A0A140N963	AI-2E family transporter OS=Escherichia coli (strain B / BL21-DE3) OX=469008 GN=ECBD_1195 PE=3 SV=1	FALSE	TRUE	FALSE	2.83286	1	1	1	5.58381e+06	0
High	A0A140N7J6	Uncharacterized protein OS=Escherichia coli (strain B / BL21-DE3) OX=469008 GN=ECBD_0640 PE=4 SV=1	FALSE	TRUE	FALSE	7.46269	1	1	1	6.5214e+06	1.98
High	A0A140N8E8	(P)ppGpp synthetase I, SpoT/RelA OS=Escherichia coli (strain B / BL21-DE3) OX=469008 GN=ECBD_0945 PE=3 SV=1	FALSE	TRUE	FALSE	4.16667	1	1	1		0
High	A0A140N755	NADH-quinone oxidoreductase subunit N OS=Escherichia coli (strain B / BL21-DE3) OX=469008 GN=nuoN PE=1 SV=1	FALSE	TRUE	FALSE	2.26804	1	1	1	2.35325e+08	0
High	A0A140NFG8	3'-5' ssDNA/RNA exonuclease TatD OS=Escherichia coli (strain B / BL21-DE3) OX=469008 GN=tatD PE=3 SV=1	FALSE	TRUE	FALSE	5	1	1	1	3.31795e+06	0
High	A0A140NDQ2	Inner membrane protein YccF OS=Escherichia coli (strain B / BL21-DE3) OX=469008 GN=ECBD_2633 PE=4 SV=1	FALSE	TRUE	FALSE	7.43243	1	1	1	2.30898e+07	2.06
High	A0A140NFF8	Molybdopterin-guanine dinucleotide biosynthesis protein B OS=Escherichia coli (strain B / BL21-DE3) OX=469008 GN=mobB PE=4 SV=1	FALSE	TRUE	FALSE	12	1	1	1	7.18806e+06	3.36
High	A0A140N826	Phosphohistidine phosphatase SixA OS=Escherichia coli (strain B / BL21-DE3) OX=469008 GN=sixA PE=4 SV=1	FALSE	TRUE	FALSE	4.96894	1	1	1	7.08782e+07	1.78
High	A0A140NFJ1	UDP-3-O-(3-hydroxymyristoyl)glucosamine N-acyltransferase OS=Escherichia coli (strain B / BL21-DE3) OX=469008 GN=lpxD PE=3 SV=1	FALSE	TRUE	FALSE	7.62463	1	2	1	2.68051e+08	3.94
High	A0A140NCI4	N5-carboxyaminoimidazole ribonucleotide synthase OS=Escherichia coli (strain B / BL21-DE3) OX=469008 GN=purK PE=3 SV=1	FALSE	TRUE	FALSE	12.1127	2	2	2	5.57869e+07	3.09
High	A0A140N940	Arsenate reductase OS=Escherichia coli (strain B / BL21-DE3) OX=469008 GN=arsC PE=3 SV=1	FALSE	TRUE	FALSE	18.4874	1	1	1	39817043	2.69
High	A0A140NC59	Glutamine ABC transporter permease GlnP OS=Escherichia coli (strain B / BL21-DE3) OX=469008 GN=glnP PE=3 SV=1	FALSE	TRUE	FALSE	4.10959	1	1	1	27995432	0
High	A0A140NCT5	2-dehydropantoate 2-reductase OS=Escherichia coli (strain B / BL21-DE3) OX=469008 GN=panE PE=3 SV=1	FALSE	TRUE	FALSE	2.9703	1	1	1	65816176	0
High	A0A140NDZ4	YbgA family protein OS=Escherichia coli (strain B / BL21-DE3) OX=469008 GN=ECBD_2954 PE=4 SV=1	FALSE	TRUE	FALSE	7.10059	1	1	1	1.63651e+07	0
High	A0A140SSA8	Probable protein kinase UbiB OS=Escherichia coli (strain B / BL21-DE3) OX=469008 GN=ubiB PE=3 SV=1	FALSE	TRUE	FALSE	2.01465	1	1	1	4.51727e+07	2.02
High	A0A140NBI0	C-lysozyme inhibitor OS=Escherichia coli (strain B / BL21-DE3) OX=469008 GN=ivy PE=3 SV=1	FALSE	TRUE	FALSE	13.3758	1	1	1	9.87208e+06	3.23
High	A0A140N3E3	Protein SlyX OS=Escherichia coli (strain B / BL21-DE3) OX=469008 GN=slyX PE=3 SV=1	FALSE	TRUE	FALSE	29.1667	2	3	2	1.1751e+07	6.21
High	A0A140N7J8	Pirin domain protein OS=Escherichia coli (strain B / BL21-DE3) OX=469008 GN=ECBD_0632 PE=3 SV=1	FALSE	TRUE	FALSE	5.15021	1	1	1		0
High	A0A140NH83	CDP-diacylglycerol pyrophosphatase OS=Escherichia coli (strain B / BL21-DE3) OX=469008 GN=cdh PE=3 SV=1	FALSE	TRUE	FALSE	3.58566	1	1	1	2.38082e+07	0
High	A0A140N3R5	BolA family protein OS=Escherichia coli (strain B / BL21-DE3) OX=469008 GN=ECBD_0552 PE=3 SV=1	FALSE	TRUE	FALSE	10.1124	1	1	1	9.23675e+06	1.75
High	A0A140N7P0	Exodeoxyribonuclease 7 large subunit OS=Escherichia coli (strain B / BL21-DE3) OX=469008 GN=xseA PE=3 SV=1	FALSE	TRUE	FALSE	2.41228	1	1	1	1.5802e+07	0
High	A0A140NB90	Copper homeostasis protein CutC OS=Escherichia coli (strain B / BL21-DE3) OX=469008 GN=cutC PE=3 SV=1	FALSE	TRUE	FALSE	4.83871	1	1	1	4.18358e+07	0
High	A0A140N7R7	Serine protease OS=Escherichia coli (strain B / BL21-DE3) OX=469008 GN=ECBD_2048 PE=3 SV=1	FALSE	TRUE	FALSE	3.2967	1	1	1	7.80247e+06	2.13
High	A0A140NEN4	Regulatory protein GntR HTH OS=Escherichia coli (strain B / BL21-DE3) OX=469008 GN=uxuR PE=4 SV=1	FALSE	TRUE	FALSE	9.72763	2	2	2	8.48969e+06	1.85
High	A0A140NG13	4-hydroxyphenylacetate degradation bifunctional isomerase/decarboxylase OS=Escherichia coli (strain B / BL21-DE3) OX=469008 GN=ECBD_3666 PE=4 SV=1	FALSE	TRUE	FALSE	2.0979	1	1	1	10126615	0
High	A0A140NCL8	ABC transporter related OS=Escherichia coli (strain B / BL21-DE3) OX=469008 GN=ECBD_3805 PE=4 SV=1	FALSE	TRUE	FALSE	3.4	1	1	1	1.9412e+07	0
High	A0A140N679	Phosphofructokinase OS=Escherichia coli (strain B / BL21-DE3) OX=469008 GN=fruK PE=3 SV=1	FALSE	TRUE	FALSE	2.5641	1	1	1	5.93789e+07	0
High	A0A140NE69	3-isopropylmalate dehydratase large subunit OS=Escherichia coli (strain B / BL21-DE3) OX=469008 GN=leuC PE=3 SV=1	FALSE	TRUE	FALSE	3.21888	1	1	1	1.56232e+07	1.64
High	A0A140NCH7	Succinate dehydrogenase hydrophobic membrane anchor subunit OS=Escherichia coli (strain B / BL21-DE3) OX=469008 GN=sdhD PE=4 SV=1	FALSE	TRUE	FALSE	8.69565	1	1	1	137986601	0
High	A0A140N210	SelB translation factor OS=Escherichia coli (strain B / BL21-DE3) OX=469008 GN=selB PE=4 SV=1	FALSE	TRUE	FALSE	2.11726	1	1	1		1.82
High	A0A140N8L8	Imidazole glycerol phosphate synthase subunit HisH OS=Escherichia coli (strain B / BL21-DE3) OX=469008 GN=hisH PE=3 SV=1	FALSE	TRUE	FALSE	6.12245	1	1	1	271671845	0
High	A0A140NFB8	UPF0253 protein YaeP OS=Escherichia coli (strain B / BL21-DE3) OX=469008 GN=yaeP PE=3 SV=1	FALSE	TRUE	FALSE	31.8182	1	1	1	133385381	2.14
High	A0A140NDN1	Cof-like hydrolase OS=Escherichia coli (strain B / BL21-DE3) OX=469008 GN=ybiV PE=4 SV=1	FALSE	TRUE	FALSE	4.79705	1	1	1	32666026	0
High	A0A140N773	Intracellular growth attenuator IgaA OS=Escherichia coli (strain B / BL21-DE3) OX=469008 GN=ECBD_0348 PE=3 SV=1	FALSE	TRUE	FALSE	2.12164	1	1	1	17227977	2.32
High	A0A140NFI8	UPF0231 protein YacL OS=Escherichia coli (strain B / BL21-DE3) OX=469008 GN=yacL PE=3 SV=1	FALSE	TRUE	FALSE	5.83333	1	1	1	6.95486e+07	0
High	A0A140NBP4	Ribosomal RNA large subunit methyltransferase F OS=Escherichia coli (strain B / BL21-DE3) OX=469008 GN=rlmF PE=3 SV=1	FALSE	TRUE	FALSE	3.8961	1	1	1	1.04236e+07	2.31
High	A0A140N4F2	Cold-shock DNA-binding domain protein OS=Escherichia coli (strain B / BL21-DE3) OX=469008 GN=cspA PE=4 SV=1	FALSE	TRUE	FALSE	38.5714	1	1	1		2.65
High	A0A140ND82	Sodium/proline symporter OS=Escherichia coli (strain B / BL21-DE3) OX=469008 GN=putP PE=3 SV=1	FALSE	TRUE	FALSE	2.98805	1	1	1	736714	2.44
High	A0A140NHV0	50S ribosomal protein L34 OS=Escherichia coli (strain B / BL21-DE3) OX=469008 GN=rpmH PE=3 SV=1	FALSE	TRUE	FALSE	19.5652	1	1	1	1.59273e+08	0
High	A0A140NBF8	Arginine ABC transporter substrate-binding protein OS=Escherichia coli (strain B / BL21-DE3) OX=469008 GN=ECBD_2734 PE=3 SV=1	FALSE	TRUE	FALSE	7.40741	1	1	1	3.75232e+07	2
High	A0A140NCJ3	YdcH family protein OS=Escherichia coli (strain B / BL21-DE3) OX=469008 GN=ECBD_2214 PE=4 SV=1	FALSE	TRUE	FALSE	12.1622	1	1	1	1.24569e+07	0
High	A0A140NF40	t(6)A37 threonylcarbamoyladenosine biosynthesis protein TsaE OS=Escherichia coli (strain B / BL21-DE3) OX=469008 GN=tsaE PE=3 SV=1	FALSE	TRUE	FALSE	8.49673	1	1	1		2.02
Medium	A0A140N714	DNA damage-inducible protein YebG OS=Escherichia coli (strain B / BL21-DE3) OX=469008 GN=yebG PE=4 SV=1	FALSE	TRUE	FALSE	23.9583	1	1	1	4.21477e+06	2.04
Medium	A0A140NDY3	Peptidoglycan lytic exotransglycosylase OS=Escherichia coli (strain B / BL21-DE3) OX=469008 GN=sltY PE=3 SV=1	FALSE	TRUE	FALSE	1.55039	1	1	1	1.0416e+07	0
Medium	A0A140NBI7	Transcriptional regulator, TetR family OS=Escherichia coli (strain B / BL21-DE3) OX=469008 GN=ECBD_2027 PE=4 SV=1	FALSE	TRUE	FALSE	7.29167	1	1	1		1.82
Medium	A0A140NF20	Transcriptional regulator, IclR family OS=Escherichia coli (strain B / BL21-DE3) OX=469008 GN=ECBD_3311 PE=4 SV=1	FALSE	TRUE	FALSE	3.20285	1	1	1	25054970	0
Medium	A0A140NAH2	ABC transporter related OS=Escherichia coli (strain B / BL21-DE3) OX=469008 GN=sapF PE=4 SV=1	FALSE	TRUE	FALSE	5.59701	1	1	1	4.42163e+06	1.88
Medium	A0A140NI00	Transcription antitermination protein RfaH OS=Escherichia coli (strain B / BL21-DE3) OX=469008 GN=rfaH PE=1 SV=1	FALSE	TRUE	FALSE	6.17284	1	1	1	2.60452e+06	0
Medium	A0A140NAU1	NAD-dependent epimerase/dehydratase OS=Escherichia coli (strain B / BL21-DE3) OX=469008 GN=ECBD_2726 PE=4 SV=1	FALSE	TRUE	FALSE	5.44413	1	1	1		2.13
Medium	A0A140NEH9	Primosomal protein 1 OS=Escherichia coli (strain B / BL21-DE3) OX=469008 GN=dnaT PE=3 SV=1	FALSE	TRUE	FALSE	16.2011	1	1	1		2.09
Medium	A0A140N5R7	Ubiquinone biosynthesis accessory factor UbiK OS=Escherichia coli (strain B / BL21-DE3) OX=469008 GN=ubiK PE=3 SV=1	FALSE	TRUE	FALSE	12.5	1	1	1	2.34235e+07	0
Medium	A0A140NAY2	DNA polymerase III subunit delta' OS=Escherichia coli (strain B / BL21-DE3) OX=469008 GN=holB PE=4 SV=1	FALSE	TRUE	FALSE	3.29341	1	1	1	6.86766e+06	0
Medium	A0A140N6D3	Uncharacterized protein OS=Escherichia coli (strain B / BL21-DE3) OX=469008 GN=ECBD_0014 PE=4 SV=1	FALSE	TRUE	FALSE	3.21782	1	1	1	1.04458e+07	0
Medium	A0A140N9W8	Pertactin domain-containing protein OS=Escherichia coli (strain B / BL21-DE3) OX=469008 GN=ECBD_1979 PE=4 SV=1	FALSE	TRUE	FALSE	2.39234	1	1	1	18688456	1.81
Medium	A0A140N6H7	L-lactate permease OS=Escherichia coli (strain B / BL21-DE3) OX=469008 GN=glcA PE=3 SV=1	FALSE	TRUE	FALSE	3.75	1	1	1		2.45
Medium	A0A140NCF0	Nitrate reductase (quinone) OS=Escherichia coli (strain B / BL21-DE3) OX=469008 GN=narZ PE=3 SV=1	FALSE	TRUE	FALSE	0.642055	1	1	1	2.49714e+08	0
Medium	A0A140N705	tRNA 5-methylaminomethyl-2-thiouridine biosynthesis bifunctional protein MnmC OS=Escherichia coli (strain B / BL21-DE3) OX=469008 GN=mnmC PE=3 SV=1	FALSE	TRUE	FALSE	1.49701	1	1	1	25415352	0
Medium	A0A140N8H0	Sulfate adenylyltransferase subunit 1 OS=Escherichia coli (strain B / BL21-DE3) OX=469008 GN=cysN PE=3 SV=1	FALSE	TRUE	FALSE	3.36842	1	2	1	3.79442e+08	2.06
Medium	A0A140NGF5	DUF853 domain-containing protein OS=Escherichia coli (strain B / BL21-DE3) OX=469008 GN=ECBD_3773 PE=4 SV=1	FALSE	TRUE	FALSE	2.2	1	1	1	9.81053e+06	0
Medium	A0A140N4B0	L-seryl-tRNA(Sec) selenium transferase OS=Escherichia coli (strain B / BL21-DE3) OX=469008 GN=selA PE=3 SV=1	FALSE	TRUE	FALSE	2.80778	1	1	1		0
Medium	A0A140NGU6	Gluconokinase OS=Escherichia coli (strain B / BL21-DE3) OX=469008 GN=idnK PE=3 SV=1	FALSE	TRUE	FALSE	5.88235	1	1	1	3.05045e+06	0
Medium	A0A140NA81	Autotransporter YejO OS=Escherichia coli (strain B / BL21-DE3) OX=469008 GN=yejO PE=4 SV=1	FALSE	TRUE	FALSE	3.2445	1	1	1		0
Medium	A0A140NDR3	Dihydrofolate reductase OS=Escherichia coli (strain B / BL21-DE3) OX=469008 GN=ECBD_3567 PE=3 SV=1	FALSE	TRUE	FALSE	9.18367	1	1	1		1.82
Medium	A0A140N825	5-carboxymethyl-2-hydroxymuconate Delta-isomerase OS=Escherichia coli (strain B / BL21-DE3) OX=469008 GN=ECBD_2442 PE=4 SV=1	FALSE	TRUE	FALSE	20.0913	2	2	2	4.52993e+06	4.45
Medium	A0A140N8D7	Bifunctional hydroxymethylpyrimidine kinase/phosphomethylpyrimidine kinase OS=Escherichia coli (strain B / BL21-DE3) OX=469008 GN=thiD PE=4 SV=1	FALSE	TRUE	FALSE	5.6391	1	1	1	1.5963e+07	2.27
Medium	A0A140N9H4	1,4-dihydroxy-2-naphthoyl-CoA hydrolase OS=Escherichia coli (strain B / BL21-DE3) OX=469008 GN=menI PE=3 SV=1	FALSE	TRUE	FALSE	10.2941	1	1	1		1.9
Medium	A0A140N6V9	Glucitol operon DNA-binding transcriptional repressor SrlR OS=Escherichia coli (strain B / BL21-DE3) OX=469008 GN=srlR PE=4 SV=1	FALSE	TRUE	FALSE	7.393	1	1	1		0
Medium	A0A140NF27	Transcriptional regulator AsnC OS=Escherichia coli (strain B / BL21-DE3) OX=469008 GN=asnC PE=4 SV=1	FALSE	TRUE	FALSE	7.23684	1	1	1		0
Medium	A0A140N4P7	Glucanase OS=Escherichia coli (strain B / BL21-DE3) OX=469008 GN=bcsZ PE=3 SV=1	FALSE	TRUE	FALSE	4.34783	1	2	1	7.05423e+07	2.25
High	P30718	60 kDa chaperonin OS=Pseudomonas aeruginosa (strain ATCC 15692 / DSM 22644 / CIP 104116 / JCM 14847 / LMG 12228 / 1C / PRS 101 / PAO1) OX=208964 GN=groL PE=1 SV=3	FALSE	FALSE	TRUE	81.3528	50	188	34	6.23737e+09	284.94
High	P09591	Elongation factor Tu OS=Pseudomonas aeruginosa (strain ATCC 15692 / DSM 22644 / CIP 104116 / JCM 14847 / LMG 12228 / 1C / PRS 101 / PAO1) OX=208964 GN=tufA PE=1 SV=2	FALSE	FALSE	TRUE	70.7809	37	103	26	2.14363e+09	134.68
High	Q9I659	Probable ClpA/B protease ATP binding subunit OS=Pseudomonas aeruginosa (strain ATCC 15692 / DSM 22644 / CIP 104116 / JCM 14847 / LMG 12228 / 1C / PRS 101 / PAO1) OX=208964 GN=PA0459 PE=4 SV=1	FALSE	FALSE	TRUE	44	30	45	26	5.16957e+08	73.55
High	P13981	Arginine deiminase OS=Pseudomonas aeruginosa (strain ATCC 15692 / DSM 22644 / CIP 104116 / JCM 14847 / LMG 12228 / 1C / PRS 101 / PAO1) OX=208964 GN=arcA PE=1 SV=2	FALSE	FALSE	TRUE	75.1196	32	52	32	6.80182e+08	90.82
High	Q9HT20	ATP synthase subunit beta OS=Pseudomonas aeruginosa (strain ATCC 15692 / DSM 22644 / CIP 104116 / JCM 14847 / LMG 12228 / 1C / PRS 101 / PAO1) OX=208964 GN=atpD PE=3 SV=1	FALSE	FALSE	TRUE	60.6987	24	56	11	5.58201e+08	117.13
High	Q9HV43	Chaperone protein DnaK OS=Pseudomonas aeruginosa (strain ATCC 15692 / DSM 22644 / CIP 104116 / JCM 14847 / LMG 12228 / 1C / PRS 101 / PAO1) OX=208964 GN=dnaK PE=3 SV=1	FALSE	FALSE	TRUE	51.8053	26	49	22	6.34238e+08	62.27
High	Q9I2V5	Aconitate hydratase B OS=Pseudomonas aeruginosa (strain ATCC 15692 / DSM 22644 / CIP 104116 / JCM 14847 / LMG 12228 / 1C / PRS 101 / PAO1) OX=208964 GN=acnB PE=3 SV=1	FALSE	FALSE	TRUE	43.6133	26	43	23	6.14742e+08	60.9
High	Q9HWC9	DNA-directed RNA polymerase subunit beta' OS=Pseudomonas aeruginosa (strain ATCC 15692 / DSM 22644 / CIP 104116 / JCM 14847 / LMG 12228 / 1C / PRS 101 / PAO1) OX=208964 GN=rpoC PE=3 SV=1	FALSE	FALSE	TRUE	35.6683	36	46	24	3.23038e+08	60.53
High	O52762	Catalase OS=Pseudomonas aeruginosa (strain ATCC 15692 / DSM 22644 / CIP 104116 / JCM 14847 / LMG 12228 / 1C / PRS 101 / PAO1) OX=208964 GN=katA PE=1 SV=1	FALSE	FALSE	TRUE	70.5394	29	45	29	7.29093e+08	33.14
High	P13794	Outer membrane porin F OS=Pseudomonas aeruginosa (strain ATCC 15692 / DSM 22644 / CIP 104116 / JCM 14847 / LMG 12228 / 1C / PRS 101 / PAO1) OX=208964 GN=oprF PE=1 SV=1	FALSE	FALSE	TRUE	56.2857	23	109	23	3.15572e+08	183.7
High	P72151	B-type flagellin OS=Pseudomonas aeruginosa (strain ATCC 15692 / DSM 22644 / CIP 104116 / JCM 14847 / LMG 12228 / 1C / PRS 101 / PAO1) OX=208964 GN=fliC PE=1 SV=2	FALSE	FALSE	TRUE	45.9016	19	33	19	8.64168e+08	62.92
High	Q59637	Pyruvate dehydrogenase E1 component OS=Pseudomonas aeruginosa (strain ATCC 15692 / DSM 22644 / CIP 104116 / JCM 14847 / LMG 12228 / 1C / PRS 101 / PAO1) OX=208964 GN=aceE PE=3 SV=2	FALSE	FALSE	TRUE	42.6304	30	39	29	5.88188e+08	59.87
High	Q9HZE0	NAD-specific glutamate dehydrogenase OS=Pseudomonas aeruginosa (strain ATCC 15692 / DSM 22644 / CIP 104116 / JCM 14847 / LMG 12228 / 1C / PRS 101 / PAO1) OX=208964 GN=gdhB PE=1 SV=1	FALSE	FALSE	TRUE	27.8395	31	36	31	3.07705e+08	49.7
High	Q9HWD2	Elongation factor G 1 OS=Pseudomonas aeruginosa (strain ATCC 15692 / DSM 22644 / CIP 104116 / JCM 14847 / LMG 12228 / 1C / PRS 101 / PAO1) OX=208964 GN=fusA PE=1 SV=1	FALSE	FALSE	TRUE	41.7847	21	30	21	8.06045e+08	54.52
High	Q9I0L5	Isocitrate dehydrogenase [NADP] OS=Pseudomonas aeruginosa (strain ATCC 15692 / DSM 22644 / CIP 104116 / JCM 14847 / LMG 12228 / 1C / PRS 101 / PAO1) OX=208964 GN=icd PE=3 SV=1	FALSE	FALSE	TRUE	48.3254	21	37	15	2.31622e+08	44.79
High	Q9I3D2	Dihydrolipoyllysine-residue succinyltransferase component of 2-oxoglutarate dehydrogenase complex OS=Pseudomonas aeruginosa (strain ATCC 15692 / DSM 22644 / CIP 104116 / JCM 14847 / LMG 12228 / 1C / PRS 101 / PAO1) OX=208964 GN=sucB PE=3 SV=1	FALSE	FALSE	TRUE	30.8068	15	29	15	2.47453e+08	39.35
High	Q51561	DNA-directed RNA polymerase subunit beta OS=Pseudomonas aeruginosa (strain ATCC 15692 / DSM 22644 / CIP 104116 / JCM 14847 / LMG 12228 / 1C / PRS 101 / PAO1) OX=208964 GN=rpoB PE=3 SV=2	FALSE	FALSE	TRUE	23.7288	25	31	21	3.91577e+08	45.83
High	P08308	Ornithine carbamoyltransferase, catabolic OS=Pseudomonas aeruginosa (strain ATCC 15692 / DSM 22644 / CIP 104116 / JCM 14847 / LMG 12228 / 1C / PRS 101 / PAO1) OX=208964 GN=arcB PE=1 SV=3	FALSE	FALSE	TRUE	53.2738	18	38	18	7.38605e+08	45.69
High	Q9HVN5	Chaperone protein ClpB OS=Pseudomonas aeruginosa (strain ATCC 15692 / DSM 22644 / CIP 104116 / JCM 14847 / LMG 12228 / 1C / PRS 101 / PAO1) OX=208964 GN=clpB PE=3 SV=1	FALSE	FALSE	TRUE	24.7073	20	31	11	3.80411e+07	40.07
High	Q9I3F5	Aconitate hydratase A OS=Pseudomonas aeruginosa (strain ATCC 15692 / DSM 22644 / CIP 104116 / JCM 14847 / LMG 12228 / 1C / PRS 101 / PAO1) OX=208964 GN=acnA PE=3 SV=1	FALSE	FALSE	TRUE	35.3846	19	27	17	2.83093e+08	29.25
High	Q9HVC4	50S ribosomal protein L25 OS=Pseudomonas aeruginosa (strain ATCC 15692 / DSM 22644 / CIP 104116 / JCM 14847 / LMG 12228 / 1C / PRS 101 / PAO1) OX=208964 GN=rplY PE=3 SV=1	FALSE	FALSE	TRUE	76.4706	11	30	11	5.1226e+08	38.34
High	O82850	30S ribosomal protein S2 OS=Pseudomonas aeruginosa (strain ATCC 15692 / DSM 22644 / CIP 104116 / JCM 14847 / LMG 12228 / 1C / PRS 101 / PAO1) OX=208964 GN=rpsB PE=3 SV=2	FALSE	FALSE	TRUE	65.4472	16	28	11	4.96903e+08	49.5
High	Q9HYT5	Usp domain-containing protein OS=Pseudomonas aeruginosa (strain ATCC 15692 / DSM 22644 / CIP 104116 / JCM 14847 / LMG 12228 / 1C / PRS 101 / PAO1) OX=208964 GN=PA3309 PE=3 SV=1	FALSE	FALSE	TRUE	80.1325	14	46	14	2.1464e+09	84.75
High	O82851	Elongation factor Ts OS=Pseudomonas aeruginosa (strain ATCC 15692 / DSM 22644 / CIP 104116 / JCM 14847 / LMG 12228 / 1C / PRS 101 / PAO1) OX=208964 GN=tsf PE=3 SV=1	FALSE	FALSE	TRUE	53.9792	17	29	17	8.12614e+08	37.2
High	Q9HT18	ATP synthase subunit alpha OS=Pseudomonas aeruginosa (strain ATCC 15692 / DSM 22644 / CIP 104116 / JCM 14847 / LMG 12228 / 1C / PRS 101 / PAO1) OX=208964 GN=atpA PE=3 SV=1	FALSE	FALSE	TRUE	48.8327	22	29	20	4.75364e+08	27.87
High	Q9HZ71	30S ribosomal protein S1 OS=Pseudomonas aeruginosa (strain ATCC 15692 / DSM 22644 / CIP 104116 / JCM 14847 / LMG 12228 / 1C / PRS 101 / PAO1) OX=208964 GN=rpsA PE=3 SV=1	FALSE	FALSE	TRUE	42.2182	18	26	17	4.60597e+08	38.66
High	Q9I3G2	Cbb3-type cytochrome c oxidase subunit OS=Pseudomonas aeruginosa (strain ATCC 15692 / DSM 22644 / CIP 104116 / JCM 14847 / LMG 12228 / 1C / PRS 101 / PAO1) OX=208964 GN=ccoP2 PE=3 SV=1	FALSE	FALSE	TRUE	50	12	23	12	7.45985e+08	29.85
High	Q9I3C5	Chaperone protein HtpG OS=Pseudomonas aeruginosa (strain ATCC 15692 / DSM 22644 / CIP 104116 / JCM 14847 / LMG 12228 / 1C / PRS 101 / PAO1) OX=208964 GN=htpG PE=3 SV=1	FALSE	FALSE	TRUE	38.1703	16	23	15	8.8088e+07	31.44
High	Q59638	Dihydrolipoyllysine-residue acetyltransferase component of pyruvate dehydrogenase complex OS=Pseudomonas aeruginosa (strain ATCC 15692 / DSM 22644 / CIP 104116 / JCM 14847 / LMG 12228 / 1C / PRS 101 / PAO1) OX=208964 GN=aceF PE=2 SV=2	FALSE	FALSE	TRUE	45.1554	18	23	18	4.83481e+08	25.87
High	Q9I5U9	AAA_PrkA domain-containing protein OS=Pseudomonas aeruginosa (strain ATCC 15692 / DSM 22644 / CIP 104116 / JCM 14847 / LMG 12228 / 1C / PRS 101 / PAO1) OX=208964 GN=PA0588 PE=4 SV=1	FALSE	FALSE	TRUE	45.4688	19	25	19	2.8502e+08	44.94
High	P05384	DNA-binding protein HU-beta OS=Pseudomonas aeruginosa (strain ATCC 15692 / DSM 22644 / CIP 104116 / JCM 14847 / LMG 12228 / 1C / PRS 101 / PAO1) OX=208964 GN=hupB PE=1 SV=3	FALSE	FALSE	TRUE	71.1111	9	27	9	2.25836e+09	42.89
High	Q9I4I1	Ribonucleoside-diphosphate reductase OS=Pseudomonas aeruginosa (strain ATCC 15692 / DSM 22644 / CIP 104116 / JCM 14847 / LMG 12228 / 1C / PRS 101 / PAO1) OX=208964 GN=nrdA PE=1 SV=1	FALSE	FALSE	TRUE	28.3489	17	19	17	1.78668e+08	33.1
High	Q9I762	Gly-zipper_Omp domain-containing protein OS=Pseudomonas aeruginosa (strain ATCC 15692 / DSM 22644 / CIP 104116 / JCM 14847 / LMG 12228 / 1C / PRS 101 / PAO1) OX=208964 GN=PA0070 PE=4 SV=1	FALSE	FALSE	TRUE	50.9868	12	17	12	2.29358e+08	36.99
High	Q9I0J6	NADH-quinone oxidoreductase subunit G OS=Pseudomonas aeruginosa (strain ATCC 15692 / DSM 22644 / CIP 104116 / JCM 14847 / LMG 12228 / 1C / PRS 101 / PAO1) OX=208964 GN=nuoG PE=3 SV=1	FALSE	FALSE	TRUE	21.6575	13	17	13	1.53575e+08	25.24
High	P11221	Major outer membrane lipoprotein OS=Pseudomonas aeruginosa (strain ATCC 15692 / DSM 22644 / CIP 104116 / JCM 14847 / LMG 12228 / 1C / PRS 101 / PAO1) OX=208964 GN=oprI PE=3 SV=1	FALSE	FALSE	TRUE	50.6024	9	33	9	3.70831e+07	56.2
High	G3XD11	PhoP/Q and low Mg2+ inducible outer membrane protein H1 OS=Pseudomonas aeruginosa (strain ATCC 15692 / DSM 22644 / CIP 104116 / JCM 14847 / LMG 12228 / 1C / PRS 101 / PAO1) OX=208964 GN=oprH PE=4 SV=1	FALSE	FALSE	TRUE	63.5	12	26	12	1.895e+09	32.95
High	Q9HY81	Alkyl hydroperoxide reductase C OS=Pseudomonas aeruginosa (strain ATCC 15692 / DSM 22644 / CIP 104116 / JCM 14847 / LMG 12228 / 1C / PRS 101 / PAO1) OX=208964 GN=PA3529 PE=3 SV=1	FALSE	FALSE	TRUE	57	8	32	8	4.89117e+08	49.94
High	P53593	Succinate--CoA ligase [ADP-forming] subunit beta OS=Pseudomonas aeruginosa (strain ATCC 15692 / DSM 22644 / CIP 104116 / JCM 14847 / LMG 12228 / 1C / PRS 101 / PAO1) OX=208964 GN=sucC PE=1 SV=2	FALSE	FALSE	TRUE	47.6804	14	30	11	4.177e+08	58.66
High	Q9I0T1	Probable acyl-CoA thiolase OS=Pseudomonas aeruginosa (strain ATCC 15692 / DSM 22644 / CIP 104116 / JCM 14847 / LMG 12228 / 1C / PRS 101 / PAO1) OX=208964 GN=PA2553 PE=3 SV=1	FALSE	FALSE	TRUE	46.7172	11	17	11	2.21239e+08	30.92
High	Q9I3D3	Oxoglutarate dehydrogenase (succinyl-transferring) OS=Pseudomonas aeruginosa (strain ATCC 15692 / DSM 22644 / CIP 104116 / JCM 14847 / LMG 12228 / 1C / PRS 101 / PAO1) OX=208964 GN=sucA PE=3 SV=1	FALSE	FALSE	TRUE	27.8897	15	18	15	1.59334e+08	30.93
High	Q9I2V3	Usp domain-containing protein OS=Pseudomonas aeruginosa (strain ATCC 15692 / DSM 22644 / CIP 104116 / JCM 14847 / LMG 12228 / 1C / PRS 101 / PAO1) OX=208964 GN=PA1789 PE=1 SV=1	FALSE	FALSE	TRUE	55.7491	10	18	10	2.73359e+08	30.18
High	Q9I4Z4	Peptidoglycan-associated lipoprotein OS=Pseudomonas aeruginosa (strain ATCC 15692 / DSM 22644 / CIP 104116 / JCM 14847 / LMG 12228 / 1C / PRS 101 / PAO1) OX=208964 GN=pal PE=3 SV=1	FALSE	FALSE	TRUE	47.0238	7	27	7	1.22307e+09	38.25
High	Q9HY79	Bacterioferritin OS=Pseudomonas aeruginosa (strain ATCC 15692 / DSM 22644 / CIP 104116 / JCM 14847 / LMG 12228 / 1C / PRS 101 / PAO1) OX=208964 GN=bfrB PE=1 SV=1	FALSE	FALSE	TRUE	60.7595	8	20	7	8.37506e+08	26.39
High	Q9I3D5	Succinate dehydrogenase flavoprotein subunit OS=Pseudomonas aeruginosa (strain ATCC 15692 / DSM 22644 / CIP 104116 / JCM 14847 / LMG 12228 / 1C / PRS 101 / PAO1) OX=208964 GN=sdhA PE=3 SV=1	FALSE	FALSE	TRUE	29.1525	11	16	9	8.01808e+07	17.67
High	Q9I3D1	Dihydrolipoyl dehydrogenase OS=Pseudomonas aeruginosa (strain ATCC 15692 / DSM 22644 / CIP 104116 / JCM 14847 / LMG 12228 / 1C / PRS 101 / PAO1) OX=208964 GN=lpdG PE=1 SV=1	FALSE	FALSE	TRUE	35.5649	13	17	13	3.36249e+08	27.19
High	O52759	30S ribosomal protein S4 OS=Pseudomonas aeruginosa (strain ATCC 15692 / DSM 22644 / CIP 104116 / JCM 14847 / LMG 12228 / 1C / PRS 101 / PAO1) OX=208964 GN=rpsD PE=3 SV=2	FALSE	FALSE	TRUE	62.6214	15	28	11	7.4282e+08	40.94
High	Q9HZM8	Ribonuclease E OS=Pseudomonas aeruginosa (strain ATCC 15692 / DSM 22644 / CIP 104116 / JCM 14847 / LMG 12228 / 1C / PRS 101 / PAO1) OX=208964 GN=rne PE=1 SV=1	FALSE	FALSE	TRUE	21.4759	14	15	13	1.88108e+08	22.8
High	Q9HZK4	Glyceraldehyde-3-phosphate dehydrogenase OS=Pseudomonas aeruginosa (strain ATCC 15692 / DSM 22644 / CIP 104116 / JCM 14847 / LMG 12228 / 1C / PRS 101 / PAO1) OX=208964 GN=PA3001 PE=3 SV=1	FALSE	FALSE	TRUE	41.2148	12	16	12	1.70688e+08	29.28
High	Q9HWE7	50S ribosomal protein L5 OS=Pseudomonas aeruginosa (strain ATCC 15692 / DSM 22644 / CIP 104116 / JCM 14847 / LMG 12228 / 1C / PRS 101 / PAO1) OX=208964 GN=rplE PE=3 SV=1	FALSE	FALSE	TRUE	60.8939	11	18	10	7.59792e+08	21.14
High	Q9I3G1	Cytochrome c oxidase, cbb3-type, CcoO subunit OS=Pseudomonas aeruginosa (strain ATCC 15692 / DSM 22644 / CIP 104116 / JCM 14847 / LMG 12228 / 1C / PRS 101 / PAO1) OX=208964 GN=ccoO2 PE=4 SV=1	FALSE	FALSE	TRUE	38.1188	7	15	4	1.14426e+08	20.28
High	Q9HV59	Polyribonucleotide nucleotidyltransferase OS=Pseudomonas aeruginosa (strain ATCC 15692 / DSM 22644 / CIP 104116 / JCM 14847 / LMG 12228 / 1C / PRS 101 / PAO1) OX=208964 GN=pnp PE=3 SV=1	FALSE	FALSE	TRUE	27.6748	18	21	18	7.83811e+07	20.77
High	Q9HWF0	50S ribosomal protein L6 OS=Pseudomonas aeruginosa (strain ATCC 15692 / DSM 22644 / CIP 104116 / JCM 14847 / LMG 12228 / 1C / PRS 101 / PAO1) OX=208964 GN=rplF PE=3 SV=1	FALSE	FALSE	TRUE	72.3164	11	22	10	1.05133e+09	31.49
High	P15276	Transcriptional regulatory protein AlgP OS=Pseudomonas aeruginosa (strain ATCC 15692 / DSM 22644 / CIP 104116 / JCM 14847 / LMG 12228 / 1C / PRS 101 / PAO1) OX=208964 GN=algP PE=4 SV=2	FALSE	FALSE	TRUE	49.1477	11	13	11	1.19852e+08	8.46
High	Q9HV55	Translation initiation factor IF-2 OS=Pseudomonas aeruginosa (strain ATCC 15692 / DSM 22644 / CIP 104116 / JCM 14847 / LMG 12228 / 1C / PRS 101 / PAO1) OX=208964 GN=infB PE=3 SV=1	FALSE	FALSE	TRUE	24.1667	11	15	10	1.09776e+08	29.71
High	Q9HWE6	50S ribosomal protein L24 OS=Pseudomonas aeruginosa (strain ATCC 15692 / DSM 22644 / CIP 104116 / JCM 14847 / LMG 12228 / 1C / PRS 101 / PAO1) OX=208964 GN=rplX PE=3 SV=1	FALSE	FALSE	TRUE	65.3846	10	15	10	3.80608e+08	28.67
High	P32722	Porin D OS=Pseudomonas aeruginosa (strain ATCC 15692 / DSM 22644 / CIP 104116 / JCM 14847 / LMG 12228 / 1C / PRS 101 / PAO1) OX=208964 GN=oprD PE=1 SV=1	FALSE	FALSE	TRUE	45.5982	13	21	13	9.42489e+07	37.01
High	Q9I5F6	Bifunctional protein PutA OS=Pseudomonas aeruginosa (strain ATCC 15692 / DSM 22644 / CIP 104116 / JCM 14847 / LMG 12228 / 1C / PRS 101 / PAO1) OX=208964 GN=putA PE=3 SV=1	FALSE	FALSE	TRUE	16.6981	12	13	12	5.11929e+07	21.6
High	Q9I2W9	Phosphoenolpyruvate synthase OS=Pseudomonas aeruginosa (strain ATCC 15692 / DSM 22644 / CIP 104116 / JCM 14847 / LMG 12228 / 1C / PRS 101 / PAO1) OX=208964 GN=ppsA PE=3 SV=1	FALSE	FALSE	TRUE	16.5613	11	16	10	2.80022e+08	15.02
High	Q9HW49	Uncharacterized protein OS=Pseudomonas aeruginosa (strain ATCC 15692 / DSM 22644 / CIP 104116 / JCM 14847 / LMG 12228 / 1C / PRS 101 / PAO1) OX=208964 GN=PA4352 PE=3 SV=1	FALSE	FALSE	TRUE	59.7902	12	18	12	2.5962e+08	22.79
High	Q9HWD4	30S ribosomal protein S10 OS=Pseudomonas aeruginosa (strain ATCC 15692 / DSM 22644 / CIP 104116 / JCM 14847 / LMG 12228 / 1C / PRS 101 / PAO1) OX=208964 GN=rpsJ PE=3 SV=1	FALSE	FALSE	TRUE	60.1942	8	22	2	3.3703e+07	36.98
High	Q9HXU8	Lipotoxon F, LptF OS=Pseudomonas aeruginosa (strain ATCC 15692 / DSM 22644 / CIP 104116 / JCM 14847 / LMG 12228 / 1C / PRS 101 / PAO1) OX=208964 GN=lptF PE=3 SV=1	FALSE	FALSE	TRUE	37.931	9	12	9	3.66684e+07	13.69
High	Q9I6Z1	Polyphosphate:ADP/GDP phosphotransferase OS=Pseudomonas aeruginosa (strain ATCC 15692 / DSM 22644 / CIP 104116 / JCM 14847 / LMG 12228 / 1C / PRS 101 / PAO1) OX=208964 GN=ppk2 PE=1 SV=2	FALSE	FALSE	TRUE	50.4202	10	17	10	5.11742e+08	19.79
High	Q9HVY6	Probable cytochrome c1 OS=Pseudomonas aeruginosa (strain ATCC 15692 / DSM 22644 / CIP 104116 / JCM 14847 / LMG 12228 / 1C / PRS 101 / PAO1) OX=208964 GN=PA4429 PE=4 SV=1	FALSE	FALSE	TRUE	53.0769	9	14	9	5.27604e+08	16.03
High	Q9HWF2	30S ribosomal protein S5 OS=Pseudomonas aeruginosa (strain ATCC 15692 / DSM 22644 / CIP 104116 / JCM 14847 / LMG 12228 / 1C / PRS 101 / PAO1) OX=208964 GN=rpsE PE=3 SV=1	FALSE	FALSE	TRUE	50	6	25	6	1.5302e+08	37.98
High	Q9HWD8	50S ribosomal protein L2 OS=Pseudomonas aeruginosa (strain ATCC 15692 / DSM 22644 / CIP 104116 / JCM 14847 / LMG 12228 / 1C / PRS 101 / PAO1) OX=208964 GN=rplB PE=3 SV=1	FALSE	FALSE	TRUE	46.5201	11	19	11	8.52036e+08	23.57
High	Q9I553	Alanine--tRNA ligase OS=Pseudomonas aeruginosa (strain ATCC 15692 / DSM 22644 / CIP 104116 / JCM 14847 / LMG 12228 / 1C / PRS 101 / PAO1) OX=208964 GN=alaS PE=3 SV=1	FALSE	FALSE	TRUE	14.5309	10	13	8	3.5619e+07	18.05
High	Q9HW93	Methyl-accepting chemotaxis protein PctC OS=Pseudomonas aeruginosa (strain ATCC 15692 / DSM 22644 / CIP 104116 / JCM 14847 / LMG 12228 / 1C / PRS 101 / PAO1) OX=208964 GN=pctC PE=1 SV=1	FALSE	FALSE	TRUE	18.6709	9	12	2	2.9181e+06	17.98
High	Q9HUP3	NH(3)-dependent NAD(+) synthetase OS=Pseudomonas aeruginosa (strain ATCC 15692 / DSM 22644 / CIP 104116 / JCM 14847 / LMG 12228 / 1C / PRS 101 / PAO1) OX=208964 GN=nadE PE=1 SV=1	FALSE	FALSE	TRUE	44	7	12	7	3.18423e+08	28.61
High	Q9HWC8	50S ribosomal protein L7/L12 OS=Pseudomonas aeruginosa (strain ATCC 15692 / DSM 22644 / CIP 104116 / JCM 14847 / LMG 12228 / 1C / PRS 101 / PAO1) OX=208964 GN=rplL PE=3 SV=1	FALSE	FALSE	TRUE	59.8361	6	19	6	1.9274e+08	15.68
High	Q51567	Succinate--CoA ligase [ADP-forming] subunit alpha OS=Pseudomonas aeruginosa (strain ATCC 15692 / DSM 22644 / CIP 104116 / JCM 14847 / LMG 12228 / 1C / PRS 101 / PAO1) OX=208964 GN=sucD PE=1 SV=2	FALSE	FALSE	TRUE	37.9661	8	19	7	3.49363e+08	32.2
High	Q9HVA2	Ketol-acid reductoisomerase (NADP(+)) OS=Pseudomonas aeruginosa (strain ATCC 15692 / DSM 22644 / CIP 104116 / JCM 14847 / LMG 12228 / 1C / PRS 101 / PAO1) OX=208964 GN=ilvC PE=1 SV=1	FALSE	FALSE	TRUE	39.0533	8	11	8	1.25501e+08	18.88
High	Q9HWC6	50S ribosomal protein L1 OS=Pseudomonas aeruginosa (strain ATCC 15692 / DSM 22644 / CIP 104116 / JCM 14847 / LMG 12228 / 1C / PRS 101 / PAO1) OX=208964 GN=rplA PE=3 SV=1	FALSE	FALSE	TRUE	36.7965	7	10	7	1.60609e+09	16.49
High	Q9I4T3	Probable outer membrane protein OS=Pseudomonas aeruginosa (strain ATCC 15692 / DSM 22644 / CIP 104116 / JCM 14847 / LMG 12228 / 1C / PRS 101 / PAO1) OX=208964 GN=PA1041 PE=3 SV=1	FALSE	FALSE	TRUE	40.4762	6	10	6	4.93799e+07	21.24
High	Q9I6Z3	Alkyl hydroperoxide reductase C OS=Pseudomonas aeruginosa (strain ATCC 15692 / DSM 22644 / CIP 104116 / JCM 14847 / LMG 12228 / 1C / PRS 101 / PAO1) OX=208964 GN=ahpC PE=3 SV=1	FALSE	FALSE	TRUE	65.2406	10	18	10	3.16171e+08	12.77
High	Q9I502	Proline--tRNA ligase OS=Pseudomonas aeruginosa (strain ATCC 15692 / DSM 22644 / CIP 104116 / JCM 14847 / LMG 12228 / 1C / PRS 101 / PAO1) OX=208964 GN=proS PE=1 SV=1	FALSE	FALSE	TRUE	23.2925	10	10	7	2.44909e+08	21.31
High	Q9I0L4	Isocitrate dehydrogenase [NADP] OS=Pseudomonas aeruginosa (strain ATCC 15692 / DSM 22644 / CIP 104116 / JCM 14847 / LMG 12228 / 1C / PRS 101 / PAO1) OX=208964 GN=idh PE=1 SV=1	FALSE	FALSE	TRUE	20.9177	9	12	9	8.00092e+07	18.99
High	O52760	DNA-directed RNA polymerase subunit alpha OS=Pseudomonas aeruginosa (strain ATCC 15692 / DSM 22644 / CIP 104116 / JCM 14847 / LMG 12228 / 1C / PRS 101 / PAO1) OX=208964 GN=rpoA PE=3 SV=2	FALSE	FALSE	TRUE	39.6396	12	21	6	9.35528e+07	12.51
High	Q9HUC3	Polyhydroxyalkanoate synthesis protein PhaF OS=Pseudomonas aeruginosa (strain ATCC 15692 / DSM 22644 / CIP 104116 / JCM 14847 / LMG 12228 / 1C / PRS 101 / PAO1) OX=208964 GN=phaF PE=4 SV=1	FALSE	FALSE	TRUE	44.3366	10	15	10	1.49526e+08	20.98
High	Q9HW91	Methyl-accepting chemotaxis protein PctB OS=Pseudomonas aeruginosa (strain ATCC 15692 / DSM 22644 / CIP 104116 / JCM 14847 / LMG 12228 / 1C / PRS 101 / PAO1) OX=208964 GN=pctB PE=1 SV=1	FALSE	FALSE	TRUE	17.4881	8	11	1	8.39843e+06	15.91
High	Q9HT19	ATP synthase gamma chain OS=Pseudomonas aeruginosa (strain ATCC 15692 / DSM 22644 / CIP 104116 / JCM 14847 / LMG 12228 / 1C / PRS 101 / PAO1) OX=208964 GN=atpG PE=3 SV=1	FALSE	FALSE	TRUE	39.5105	8	13	8	2.94635e+08	14.72
High	Q9I3D4	Succinate dehydrogenase (B subunit) OS=Pseudomonas aeruginosa (strain ATCC 15692 / DSM 22644 / CIP 104116 / JCM 14847 / LMG 12228 / 1C / PRS 101 / PAO1) OX=208964 GN=sdhB PE=3 SV=1	FALSE	FALSE	TRUE	51.4894	8	21	6	6.76131e+08	34.52
High	O30508	Succinylornithine transaminase/acetylornithine aminotransferase OS=Pseudomonas aeruginosa (strain ATCC 15692 / DSM 22644 / CIP 104116 / JCM 14847 / LMG 12228 / 1C / PRS 101 / PAO1) OX=208964 GN=aruC PE=1 SV=2	FALSE	FALSE	TRUE	31.2808	8	8	8	2.00402e+08	11.72
High	Q9HXH0	Valine--tRNA ligase OS=Pseudomonas aeruginosa (strain ATCC 15692 / DSM 22644 / CIP 104116 / JCM 14847 / LMG 12228 / 1C / PRS 101 / PAO1) OX=208964 GN=valS PE=1 SV=1	FALSE	FALSE	TRUE	11.2632	9	12	5	6.62548e+07	14.92
High	Q9I5Z9	Uncharacterized protein OS=Pseudomonas aeruginosa (strain ATCC 15692 / DSM 22644 / CIP 104116 / JCM 14847 / LMG 12228 / 1C / PRS 101 / PAO1) OX=208964 GN=PA0537 PE=3 SV=1	FALSE	FALSE	TRUE	30.6931	5	8	5	9.40689e+07	14.36
High	Q9I4Z7	Probable dna-binding stress protein OS=Pseudomonas aeruginosa (strain ATCC 15692 / DSM 22644 / CIP 104116 / JCM 14847 / LMG 12228 / 1C / PRS 101 / PAO1) OX=208964 GN=PA0962 PE=3 SV=1	FALSE	FALSE	TRUE	49.359	7	15	7	7.86343e+08	28.11
High	Q9HWE5	50S ribosomal protein L14 OS=Pseudomonas aeruginosa (strain ATCC 15692 / DSM 22644 / CIP 104116 / JCM 14847 / LMG 12228 / 1C / PRS 101 / PAO1) OX=208964 GN=rplN PE=3 SV=1	FALSE	FALSE	TRUE	59.0164	9	20	7	2.53226e+08	27.98
High	Q9HXM5	Inosine-5'-monophosphate dehydrogenase OS=Pseudomonas aeruginosa (strain ATCC 15692 / DSM 22644 / CIP 104116 / JCM 14847 / LMG 12228 / 1C / PRS 101 / PAO1) OX=208964 GN=guaB PE=1 SV=1	FALSE	FALSE	TRUE	25.5624	9	13	9	2.46763e+07	21.66
High	Q9HTD9	Alcohol dehydrogenase OS=Pseudomonas aeruginosa (strain ATCC 15692 / DSM 22644 / CIP 104116 / JCM 14847 / LMG 12228 / 1C / PRS 101 / PAO1) OX=208964 GN=adhA PE=1 SV=1	FALSE	FALSE	TRUE	41.5205	9	11	9	6.04466e+08	12.12
High	P26480	RNA polymerase sigma factor RpoD OS=Pseudomonas aeruginosa (strain ATCC 15692 / DSM 22644 / CIP 104116 / JCM 14847 / LMG 12228 / 1C / PRS 101 / PAO1) OX=208964 GN=rpoD PE=3 SV=1	FALSE	FALSE	TRUE	19.7731	9	10	2	1.3351e+07	13.91
High	Q9HZP6	Electron transfer flavoprotein subunit beta OS=Pseudomonas aeruginosa (strain ATCC 15692 / DSM 22644 / CIP 104116 / JCM 14847 / LMG 12228 / 1C / PRS 101 / PAO1) OX=208964 GN=etfB PE=3 SV=1	FALSE	FALSE	TRUE	37.3494	5	9	5	2.45647e+08	17.17
High	Q9HTV1	Transcription termination factor Rho OS=Pseudomonas aeruginosa (strain ATCC 15692 / DSM 22644 / CIP 104116 / JCM 14847 / LMG 12228 / 1C / PRS 101 / PAO1) OX=208964 GN=rho PE=3 SV=1	FALSE	FALSE	TRUE	26.0143	12	17	3	5.89749e+07	19.41
High	Q9HUM9	30S ribosomal protein S6 OS=Pseudomonas aeruginosa (strain ATCC 15692 / DSM 22644 / CIP 104116 / JCM 14847 / LMG 12228 / 1C / PRS 101 / PAO1) OX=208964 GN=rpsF PE=3 SV=1	FALSE	FALSE	TRUE	50.3597	7	12	7	2.46077e+08	22.61
High	P47204	Cell division protein FtsZ OS=Pseudomonas aeruginosa (strain ATCC 15692 / DSM 22644 / CIP 104116 / JCM 14847 / LMG 12228 / 1C / PRS 101 / PAO1) OX=208964 GN=ftsZ PE=1 SV=2	FALSE	FALSE	TRUE	29.4416	8	10	7	1.05342e+08	16.08
High	Q9I3I5	Cell division protein ZipA OS=Pseudomonas aeruginosa (strain ATCC 15692 / DSM 22644 / CIP 104116 / JCM 14847 / LMG 12228 / 1C / PRS 101 / PAO1) OX=208964 GN=zipA PE=3 SV=1	FALSE	FALSE	TRUE	35.2941	7	9	7	3.10192e+07	17.09
High	Q9HWW1	Outer membrane protein OprG OS=Pseudomonas aeruginosa (strain ATCC 15692 / DSM 22644 / CIP 104116 / JCM 14847 / LMG 12228 / 1C / PRS 101 / PAO1) OX=208964 GN=oprG PE=1 SV=1	FALSE	FALSE	TRUE	33.6207	6	19	6	2.5592e+09	38.67
High	Q9I2A8	Acetyl-CoA acetyltransferase OS=Pseudomonas aeruginosa (strain ATCC 15692 / DSM 22644 / CIP 104116 / JCM 14847 / LMG 12228 / 1C / PRS 101 / PAO1) OX=208964 GN=atoB PE=3 SV=1	FALSE	FALSE	TRUE	36.1323	9	10	9	2.94396e+07	12.99
High	Q9HUN2	50S ribosomal protein L9 OS=Pseudomonas aeruginosa (strain ATCC 15692 / DSM 22644 / CIP 104116 / JCM 14847 / LMG 12228 / 1C / PRS 101 / PAO1) OX=208964 GN=rplI PE=3 SV=1	FALSE	FALSE	TRUE	54.0541	6	16	5	1.19813e+08	27.93
High	Q9I7C4	Beta sliding clamp OS=Pseudomonas aeruginosa (strain ATCC 15692 / DSM 22644 / CIP 104116 / JCM 14847 / LMG 12228 / 1C / PRS 101 / PAO1) OX=208964 GN=dnaN PE=1 SV=1	FALSE	FALSE	TRUE	19.6185	5	7	5	1.04579e+08	13.81
High	Q9HWC7	50S ribosomal protein L10 OS=Pseudomonas aeruginosa (strain ATCC 15692 / DSM 22644 / CIP 104116 / JCM 14847 / LMG 12228 / 1C / PRS 101 / PAO1) OX=208964 GN=rplJ PE=3 SV=1	FALSE	FALSE	TRUE	40.3614	7	11	7	7.16415e+08	27.52
High	Q9HXQ2	50S ribosomal protein L19 OS=Pseudomonas aeruginosa (strain ATCC 15692 / DSM 22644 / CIP 104116 / JCM 14847 / LMG 12228 / 1C / PRS 101 / PAO1) OX=208964 GN=rplS PE=3 SV=1	FALSE	FALSE	TRUE	56.0345	8	12	8	7.15416e+08	12.23
High	Q9HX32	LPS-assembly lipoprotein LptE OS=Pseudomonas aeruginosa (strain ATCC 15692 / DSM 22644 / CIP 104116 / JCM 14847 / LMG 12228 / 1C / PRS 101 / PAO1) OX=208964 GN=lptE PE=1 SV=1	FALSE	FALSE	TRUE	33.3333	5	8	5	2.37234e+08	13.53
High	Q9I2Z1	Macro domain-containing protein OS=Pseudomonas aeruginosa (strain ATCC 15692 / DSM 22644 / CIP 104116 / JCM 14847 / LMG 12228 / 1C / PRS 101 / PAO1) OX=208964 GN=PA1746 PE=4 SV=1	FALSE	FALSE	TRUE	54.1667	5	7	5	2.11046e+08	5.95
High	Q9HX33	Leucine--tRNA ligase OS=Pseudomonas aeruginosa (strain ATCC 15692 / DSM 22644 / CIP 104116 / JCM 14847 / LMG 12228 / 1C / PRS 101 / PAO1) OX=208964 GN=leuS PE=3 SV=1	FALSE	FALSE	TRUE	12.7148	8	9	8	4.86941e+07	11.65
High	Q9HX05	Probable aldehyde dehydrogenase OS=Pseudomonas aeruginosa (strain ATCC 15692 / DSM 22644 / CIP 104116 / JCM 14847 / LMG 12228 / 1C / PRS 101 / PAO1) OX=208964 GN=PA4022 PE=3 SV=1	FALSE	FALSE	TRUE	27.8656	8	9	8	1.14726e+08	19.72
High	Q9HV96	APH domain-containing protein OS=Pseudomonas aeruginosa (strain ATCC 15692 / DSM 22644 / CIP 104116 / JCM 14847 / LMG 12228 / 1C / PRS 101 / PAO1) OX=208964 GN=PA4701 PE=4 SV=1	FALSE	FALSE	TRUE	12.5	4	6	4	3.03699e+07	15.4
High	P42257	Protein PilJ OS=Pseudomonas aeruginosa (strain ATCC 15692 / DSM 22644 / CIP 104116 / JCM 14847 / LMG 12228 / 1C / PRS 101 / PAO1) OX=208964 GN=pilJ PE=4 SV=1	FALSE	FALSE	TRUE	16.4223	8	9	8	7.22425e+07	12.66
High	Q9HWD1	30S ribosomal protein S7 OS=Pseudomonas aeruginosa (strain ATCC 15692 / DSM 22644 / CIP 104116 / JCM 14847 / LMG 12228 / 1C / PRS 101 / PAO1) OX=208964 GN=rpsG PE=3 SV=1	FALSE	FALSE	TRUE	48.0769	10	16	10	6.67079e+08	20.16
High	Q9I2U2	Trigger factor OS=Pseudomonas aeruginosa (strain ATCC 15692 / DSM 22644 / CIP 104116 / JCM 14847 / LMG 12228 / 1C / PRS 101 / PAO1) OX=208964 GN=tig PE=3 SV=1	FALSE	FALSE	TRUE	41.7431	11	12	11	5.68821e+07	10.79
High	Q9I3G4	Cytochrome c oxidase, cbb3-type, CcoO subunit OS=Pseudomonas aeruginosa (strain ATCC 15692 / DSM 22644 / CIP 104116 / JCM 14847 / LMG 12228 / 1C / PRS 101 / PAO1) OX=208964 GN=ccoO1 PE=4 SV=1	FALSE	FALSE	TRUE	25.1232	5	9	2	208983193	13.44
High	Q9HTZ7	Phosphoenolpyruvate carboxykinase (ATP) OS=Pseudomonas aeruginosa (strain ATCC 15692 / DSM 22644 / CIP 104116 / JCM 14847 / LMG 12228 / 1C / PRS 101 / PAO1) OX=208964 GN=pckA PE=3 SV=1	FALSE	FALSE	TRUE	26.5107	9	9	9	1.73181e+08	9.91
High	G3XD74	Serine-type D-Ala-D-Ala carboxypeptidase OS=Pseudomonas aeruginosa (strain ATCC 15692 / DSM 22644 / CIP 104116 / JCM 14847 / LMG 12228 / 1C / PRS 101 / PAO1) OX=208964 GN=dacC PE=3 SV=1	FALSE	FALSE	TRUE	27.2021	8	9	8	2.07632e+08	11.63
High	Q9I5Z0	S-adenosylmethionine synthase OS=Pseudomonas aeruginosa (strain ATCC 15692 / DSM 22644 / CIP 104116 / JCM 14847 / LMG 12228 / 1C / PRS 101 / PAO1) OX=208964 GN=metK PE=3 SV=1	FALSE	FALSE	TRUE	22.9798	8	10	7	2.69863e+07	7.79
High	Q9HWE1	30S ribosomal protein S3 OS=Pseudomonas aeruginosa (strain ATCC 15692 / DSM 22644 / CIP 104116 / JCM 14847 / LMG 12228 / 1C / PRS 101 / PAO1) OX=208964 GN=rpsC PE=3 SV=1	FALSE	FALSE	TRUE	44.2982	9	11	7	1.81284e+08	11.21
High	Q9HY13	XFP_N domain-containing protein OS=Pseudomonas aeruginosa (strain ATCC 15692 / DSM 22644 / CIP 104116 / JCM 14847 / LMG 12228 / 1C / PRS 101 / PAO1) OX=208964 GN=PA3613 PE=4 SV=1	FALSE	FALSE	TRUE	17.603	9	9	9	1.08211e+08	8.15
High	Q9HU65	Glutamine synthetase OS=Pseudomonas aeruginosa (strain ATCC 15692 / DSM 22644 / CIP 104116 / JCM 14847 / LMG 12228 / 1C / PRS 101 / PAO1) OX=208964 GN=glnA PE=1 SV=1	FALSE	FALSE	TRUE	18.9765	6	8	6	1.44832e+08	14.15
High	Q9HWD9	30S ribosomal protein S19 OS=Pseudomonas aeruginosa (strain ATCC 15692 / DSM 22644 / CIP 104116 / JCM 14847 / LMG 12228 / 1C / PRS 101 / PAO1) OX=208964 GN=rpsS PE=3 SV=1	FALSE	FALSE	TRUE	31.8681	9	14	4	2.25518e+06	12.95
High	Q9HUN0	30S ribosomal protein S18 OS=Pseudomonas aeruginosa (strain ATCC 15692 / DSM 22644 / CIP 104116 / JCM 14847 / LMG 12228 / 1C / PRS 101 / PAO1) OX=208964 GN=rpsR PE=3 SV=1	FALSE	FALSE	TRUE	40.7895	4	8	4	3.30323e+08	11.19
High	P13982	Carbamate kinase OS=Pseudomonas aeruginosa (strain ATCC 15692 / DSM 22644 / CIP 104116 / JCM 14847 / LMG 12228 / 1C / PRS 101 / PAO1) OX=208964 GN=arcC PE=3 SV=1	FALSE	FALSE	TRUE	38.7097	8	12	8	3.83576e+08	19.3
High	O68822	Cytosol aminopeptidase OS=Pseudomonas aeruginosa (strain ATCC 15692 / DSM 22644 / CIP 104116 / JCM 14847 / LMG 12228 / 1C / PRS 101 / PAO1) OX=208964 GN=pepA PE=3 SV=1	FALSE	FALSE	TRUE	16.9697	5	6	5	1.26873e+08	8.55
High	Q9HVY2	50S ribosomal protein L13 OS=Pseudomonas aeruginosa (strain ATCC 15692 / DSM 22644 / CIP 104116 / JCM 14847 / LMG 12228 / 1C / PRS 101 / PAO1) OX=208964 GN=rplM PE=3 SV=1	FALSE	FALSE	TRUE	52.1127	5	9	4	1.33081e+08	18.06
High	G3XD61	UDP-2,3-diacetamido-2,3-dideoxy-D-glucuronate 2-epimerase OS=Pseudomonas aeruginosa (strain ATCC 15692 / DSM 22644 / CIP 104116 / JCM 14847 / LMG 12228 / 1C / PRS 101 / PAO1) OX=208964 GN=wbpI PE=1 SV=1	FALSE	FALSE	TRUE	26.8362	7	10	7	1.22115e+08	10.06
High	Q9I4S1	Rick_17kDa_Anti domain-containing protein OS=Pseudomonas aeruginosa (strain ATCC 15692 / DSM 22644 / CIP 104116 / JCM 14847 / LMG 12228 / 1C / PRS 101 / PAO1) OX=208964 GN=PA1053 PE=4 SV=1	FALSE	FALSE	TRUE	39.6104	5	8	5	350608428	8.65
High	Q9HWD5	50S ribosomal protein L3 OS=Pseudomonas aeruginosa (strain ATCC 15692 / DSM 22644 / CIP 104116 / JCM 14847 / LMG 12228 / 1C / PRS 101 / PAO1) OX=208964 GN=rplC PE=3 SV=1	FALSE	FALSE	TRUE	42.1801	7	14	6	4.72196e+08	8.31
High	P00282	Azurin OS=Pseudomonas aeruginosa (strain ATCC 15692 / DSM 22644 / CIP 104116 / JCM 14847 / LMG 12228 / 1C / PRS 101 / PAO1) OX=208964 GN=azu PE=1 SV=2	FALSE	FALSE	TRUE	60.1351	5	9	5	4.20419e+08	18.47
High	Q9I0M2	Thioredoxin reductase OS=Pseudomonas aeruginosa (strain ATCC 15692 / DSM 22644 / CIP 104116 / JCM 14847 / LMG 12228 / 1C / PRS 101 / PAO1) OX=208964 GN=trxB1 PE=3 SV=1	FALSE	FALSE	TRUE	26.8987	4	6	2	4.68962e+08	13.33
High	Q9HVM4	Isoleucine--tRNA ligase OS=Pseudomonas aeruginosa (strain ATCC 15692 / DSM 22644 / CIP 104116 / JCM 14847 / LMG 12228 / 1C / PRS 101 / PAO1) OX=208964 GN=ileS PE=3 SV=1	FALSE	FALSE	TRUE	13.4677	9	9	9	5.73066e+07	10.99
High	Q9HW73	Uncharacterized protein OS=Pseudomonas aeruginosa (strain ATCC 15692 / DSM 22644 / CIP 104116 / JCM 14847 / LMG 12228 / 1C / PRS 101 / PAO1) OX=208964 GN=PA4328 PE=4 SV=1	FALSE	FALSE	TRUE	25.6579	5	7	5	4.29549e+07	8.39
High	Q51422	Aspartate--tRNA(Asp/Asn) ligase OS=Pseudomonas aeruginosa (strain ATCC 15692 / DSM 22644 / CIP 104116 / JCM 14847 / LMG 12228 / 1C / PRS 101 / PAO1) OX=208964 GN=aspS PE=1 SV=2	FALSE	FALSE	TRUE	14.2132	6	8	4	8.55243e+07	12.95
High	Q9I5Y4	Phosphoglycerate kinase OS=Pseudomonas aeruginosa (strain ATCC 15692 / DSM 22644 / CIP 104116 / JCM 14847 / LMG 12228 / 1C / PRS 101 / PAO1) OX=208964 GN=pgk PE=3 SV=1	FALSE	FALSE	TRUE	30.491	6	13	4	3.58453e+07	30.8
High	Q9HWF4	50S ribosomal protein L15 OS=Pseudomonas aeruginosa (strain ATCC 15692 / DSM 22644 / CIP 104116 / JCM 14847 / LMG 12228 / 1C / PRS 101 / PAO1) OX=208964 GN=rplO PE=3 SV=1	FALSE	FALSE	TRUE	32.6389	7	9	7	259740214	6.49
High	Q9HWD6	50S ribosomal protein L4 OS=Pseudomonas aeruginosa (strain ATCC 15692 / DSM 22644 / CIP 104116 / JCM 14847 / LMG 12228 / 1C / PRS 101 / PAO1) OX=208964 GN=rplD PE=3 SV=1	FALSE	FALSE	TRUE	35.5	6	13	6	3.73777e+08	17.49
High	Q9HVC5	Ribose-phosphate pyrophosphokinase OS=Pseudomonas aeruginosa (strain ATCC 15692 / DSM 22644 / CIP 104116 / JCM 14847 / LMG 12228 / 1C / PRS 101 / PAO1) OX=208964 GN=prs PE=3 SV=1	FALSE	FALSE	TRUE	22.3642	5	8	4	39666544	14.17
High	Q9HW86	MvaT OS=Pseudomonas aeruginosa (strain ATCC 15692 / DSM 22644 / CIP 104116 / JCM 14847 / LMG 12228 / 1C / PRS 101 / PAO1) OX=208964 GN=mvaT PE=1 SV=1	FALSE	FALSE	TRUE	41.129	5	12	5	8.03644e+07	16.09
High	P38100	Carbamoyl-phosphate synthase large chain OS=Pseudomonas aeruginosa (strain ATCC 15692 / DSM 22644 / CIP 104116 / JCM 14847 / LMG 12228 / 1C / PRS 101 / PAO1) OX=208964 GN=carB PE=3 SV=3	FALSE	FALSE	TRUE	10.2516	8	11	5	7.92647e+07	16.47
High	P31961	Phosphogluconate dehydratase OS=Pseudomonas aeruginosa (strain ATCC 15692 / DSM 22644 / CIP 104116 / JCM 14847 / LMG 12228 / 1C / PRS 101 / PAO1) OX=208964 GN=edd PE=3 SV=3	FALSE	FALSE	TRUE	12.0066	4	6	4	1.01058e+07	7.2
High	Q9I0K4	Isocitrate lyase OS=Pseudomonas aeruginosa (strain ATCC 15692 / DSM 22644 / CIP 104116 / JCM 14847 / LMG 12228 / 1C / PRS 101 / PAO1) OX=208964 GN=PA2634 PE=1 SV=1	FALSE	FALSE	TRUE	15.6309	5	7	5	6.08219e+07	7.6
High	Q59643	Delta-aminolevulinic acid dehydratase OS=Pseudomonas aeruginosa (strain ATCC 15692 / DSM 22644 / CIP 104116 / JCM 14847 / LMG 12228 / 1C / PRS 101 / PAO1) OX=208964 GN=hemB PE=1 SV=1	FALSE	FALSE	TRUE	24.9258	6	7	6	1.62188e+08	11.94
High	Q9I5E3	Citrate synthase OS=Pseudomonas aeruginosa (strain ATCC 15692 / DSM 22644 / CIP 104116 / JCM 14847 / LMG 12228 / 1C / PRS 101 / PAO1) OX=208964 GN=prpC PE=3 SV=1	FALSE	FALSE	TRUE	22.4	5	7	5	1.19361e+07	11.48
High	G3XDA5	Anaerobically-induced outer membrane porin OprE OS=Pseudomonas aeruginosa (strain ATCC 15692 / DSM 22644 / CIP 104116 / JCM 14847 / LMG 12228 / 1C / PRS 101 / PAO1) OX=208964 GN=oprE PE=1 SV=1	FALSE	FALSE	TRUE	15.8696	6	6	6	1.28388e+07	15
High	Q9I047	Transaldolase OS=Pseudomonas aeruginosa (strain ATCC 15692 / DSM 22644 / CIP 104116 / JCM 14847 / LMG 12228 / 1C / PRS 101 / PAO1) OX=208964 GN=tal PE=3 SV=1	FALSE	FALSE	TRUE	37.785	9	13	8	8.10595e+07	24.85
High	Q9HWF8	30S ribosomal protein S11 OS=Pseudomonas aeruginosa (strain ATCC 15692 / DSM 22644 / CIP 104116 / JCM 14847 / LMG 12228 / 1C / PRS 101 / PAO1) OX=208964 GN=rpsK PE=3 SV=1	FALSE	FALSE	TRUE	41.0853	5	11	3	2.46178e+08	12.25
High	Q9HXZ2	Acetyl-coenzyme A carboxylase carboxyl transferase subunit alpha OS=Pseudomonas aeruginosa (strain ATCC 15692 / DSM 22644 / CIP 104116 / JCM 14847 / LMG 12228 / 1C / PRS 101 / PAO1) OX=208964 GN=accA PE=1 SV=1	FALSE	FALSE	TRUE	30.0633	7	8	7	8.4293e+07	16.73
High	P30720	10 kDa chaperonin OS=Pseudomonas aeruginosa (strain ATCC 15692 / DSM 22644 / CIP 104116 / JCM 14847 / LMG 12228 / 1C / PRS 101 / PAO1) OX=208964 GN=groS PE=3 SV=1	FALSE	FALSE	TRUE	48.4536	5	8	5	2.46073e+08	8.33
High	P14165	Citrate synthase OS=Pseudomonas aeruginosa (strain ATCC 15692 / DSM 22644 / CIP 104116 / JCM 14847 / LMG 12228 / 1C / PRS 101 / PAO1) OX=208964 GN=gltA PE=1 SV=2	FALSE	FALSE	TRUE	7.47664	3	5	3	4.23666e+07	7.25
High	Q9HVT8	Glutamyl-tRNA(Gln) amidotransferase subunit A OS=Pseudomonas aeruginosa (strain ATCC 15692 / DSM 22644 / CIP 104116 / JCM 14847 / LMG 12228 / 1C / PRS 101 / PAO1) OX=208964 GN=gatA PE=1 SV=1	FALSE	FALSE	TRUE	14.6694	4	6	4	9.38406e+07	10.9
High	Q9I685	Adenosylhomocysteinase OS=Pseudomonas aeruginosa (strain ATCC 15692 / DSM 22644 / CIP 104116 / JCM 14847 / LMG 12228 / 1C / PRS 101 / PAO1) OX=208964 GN=ahcY PE=1 SV=1	FALSE	FALSE	TRUE	13.4328	4	6	4	4.63346e+07	11.24
High	Q9I0J9	NADH-quinone oxidoreductase subunit C/D OS=Pseudomonas aeruginosa (strain ATCC 15692 / DSM 22644 / CIP 104116 / JCM 14847 / LMG 12228 / 1C / PRS 101 / PAO1) OX=208964 GN=nuoC PE=3 SV=1	FALSE	FALSE	TRUE	17.032	7	7	5	5.0859e+07	8.93
High	Q9HZA6	Motility hub protein FimV OS=Pseudomonas aeruginosa (strain ATCC 15692 / DSM 22644 / CIP 104116 / JCM 14847 / LMG 12228 / 1C / PRS 101 / PAO1) OX=208964 GN=fimV PE=1 SV=1	FALSE	FALSE	TRUE	8.26986	5	7	5	1.67773e+07	14.11
High	Q9HUM2	Protein HflK OS=Pseudomonas aeruginosa (strain ATCC 15692 / DSM 22644 / CIP 104116 / JCM 14847 / LMG 12228 / 1C / PRS 101 / PAO1) OX=208964 GN=hflK PE=3 SV=1	FALSE	FALSE	TRUE	18	4	5	4	3.44789e+07	13.02
High	Q9HVX4	Uncharacterized protein OS=Pseudomonas aeruginosa (strain ATCC 15692 / DSM 22644 / CIP 104116 / JCM 14847 / LMG 12228 / 1C / PRS 101 / PAO1) OX=208964 GN=PA4441 PE=4 SV=1	FALSE	FALSE	TRUE	44.5946	5	5	5	2.98155e+07	10.73
High	P24474	Nitrite reductase OS=Pseudomonas aeruginosa (strain ATCC 15692 / DSM 22644 / CIP 104116 / JCM 14847 / LMG 12228 / 1C / PRS 101 / PAO1) OX=208964 GN=nirS PE=1 SV=1	FALSE	FALSE	TRUE	18.3099	8	8	8	2.75909e+07	6.31
High	Q9HTU9	Glyoxalase OS=Pseudomonas aeruginosa (strain ATCC 15692 / DSM 22644 / CIP 104116 / JCM 14847 / LMG 12228 / 1C / PRS 101 / PAO1) OX=208964 GN=PA5245 PE=3 SV=1	FALSE	FALSE	TRUE	41.8919	4	6	4	3.99731e+07	14.3
High	Q9HWE0	50S ribosomal protein L22 OS=Pseudomonas aeruginosa (strain ATCC 15692 / DSM 22644 / CIP 104116 / JCM 14847 / LMG 12228 / 1C / PRS 101 / PAO1) OX=208964 GN=rplV PE=3 SV=1	FALSE	FALSE	TRUE	47.2727	5	7	5	6.45238e+07	12.97
High	G3XD14	RNA polymerase-binding transcription factor DksA OS=Pseudomonas aeruginosa (strain ATCC 15692 / DSM 22644 / CIP 104116 / JCM 14847 / LMG 12228 / 1C / PRS 101 / PAO1) OX=208964 GN=dksA PE=3 SV=1	FALSE	FALSE	TRUE	39.8649	5	7	5	2.16453e+07	6.47
High	O52761	50S ribosomal protein L17 OS=Pseudomonas aeruginosa (strain ATCC 15692 / DSM 22644 / CIP 104116 / JCM 14847 / LMG 12228 / 1C / PRS 101 / PAO1) OX=208964 GN=rplQ PE=3 SV=1	FALSE	FALSE	TRUE	55.814	7	10	7	2.73088e+08	9.56
High	Q9HWZ6	Inorganic pyrophosphatase OS=Pseudomonas aeruginosa (strain ATCC 15692 / DSM 22644 / CIP 104116 / JCM 14847 / LMG 12228 / 1C / PRS 101 / PAO1) OX=208964 GN=ppa PE=1 SV=1	FALSE	FALSE	TRUE	30.8571	4	6	4	1.7504e+07	8.12
High	Q9HWE4	30S ribosomal protein S17 OS=Pseudomonas aeruginosa (strain ATCC 15692 / DSM 22644 / CIP 104116 / JCM 14847 / LMG 12228 / 1C / PRS 101 / PAO1) OX=208964 GN=rpsQ PE=3 SV=1	FALSE	FALSE	TRUE	54.5455	7	9	6	1.16025e+08	10.59
High	Q9HYZ6	Cell division inhibitor MinD OS=Pseudomonas aeruginosa (strain ATCC 15692 / DSM 22644 / CIP 104116 / JCM 14847 / LMG 12228 / 1C / PRS 101 / PAO1) OX=208964 GN=minD PE=1 SV=1	FALSE	FALSE	TRUE	25.4613	4	6	4	4.01099e+07	7.49
High	Q9HWC5	50S ribosomal protein L11 OS=Pseudomonas aeruginosa (strain ATCC 15692 / DSM 22644 / CIP 104116 / JCM 14847 / LMG 12228 / 1C / PRS 101 / PAO1) OX=208964 GN=rplK PE=3 SV=1	FALSE	FALSE	TRUE	30.7692	4	7	4	6.51306e+08	14.88
High	Q9I5Y8	Transketolase OS=Pseudomonas aeruginosa (strain ATCC 15692 / DSM 22644 / CIP 104116 / JCM 14847 / LMG 12228 / 1C / PRS 101 / PAO1) OX=208964 GN=tktA PE=1 SV=1	FALSE	FALSE	TRUE	11.7293	5	6	5	5.8859e+07	5.96
High	Q9I7C2	DNA gyrase subunit B OS=Pseudomonas aeruginosa (strain ATCC 15692 / DSM 22644 / CIP 104116 / JCM 14847 / LMG 12228 / 1C / PRS 101 / PAO1) OX=208964 GN=gyrB PE=3 SV=1	FALSE	FALSE	TRUE	11.4144	7	7	4	9.10751e+07	2.99
High	Q9HUM6	Adenylosuccinate synthetase OS=Pseudomonas aeruginosa (strain ATCC 15692 / DSM 22644 / CIP 104116 / JCM 14847 / LMG 12228 / 1C / PRS 101 / PAO1) OX=208964 GN=purA PE=3 SV=1	FALSE	FALSE	TRUE	15.5814	4	10	2	4.73615e+07	8.26
High	Q9HWF9	Bacterioferritin OS=Pseudomonas aeruginosa (strain ATCC 15692 / DSM 22644 / CIP 104116 / JCM 14847 / LMG 12228 / 1C / PRS 101 / PAO1) OX=208964 GN=bfr PE=1 SV=1	FALSE	FALSE	TRUE	41.5584	4	6	4	2.01624e+08	4.38
High	P27726	Glyceraldehyde-3-phosphate dehydrogenase OS=Pseudomonas aeruginosa (strain ATCC 15692 / DSM 22644 / CIP 104116 / JCM 14847 / LMG 12228 / 1C / PRS 101 / PAO1) OX=208964 GN=gap PE=3 SV=3	FALSE	FALSE	TRUE	22.4551	4	4	4	1.31489e+08	8.13
High	Q9HYK7	Ferredoxin--NADP reductase OS=Pseudomonas aeruginosa (strain ATCC 15692 / DSM 22644 / CIP 104116 / JCM 14847 / LMG 12228 / 1C / PRS 101 / PAO1) OX=208964 GN=fpr PE=1 SV=1	FALSE	FALSE	TRUE	25.5814	5	8	5	7.02148e+07	8.2
High	Q9I456	Probable outer membrane protein OS=Pseudomonas aeruginosa (strain ATCC 15692 / DSM 22644 / CIP 104116 / JCM 14847 / LMG 12228 / 1C / PRS 101 / PAO1) OX=208964 GN=PA1288 PE=3 SV=1	FALSE	FALSE	TRUE	15.3302	5	5	5	4.86464e+07	6.62
High	P37798	Biotin carboxylase OS=Pseudomonas aeruginosa (strain ATCC 15692 / DSM 22644 / CIP 104116 / JCM 14847 / LMG 12228 / 1C / PRS 101 / PAO1) OX=208964 GN=accC PE=1 SV=1	FALSE	FALSE	TRUE	16.7038	4	6	4	1.24968e+08	9.36
High	Q9HZC5	Aminopeptidase N OS=Pseudomonas aeruginosa (strain ATCC 15692 / DSM 22644 / CIP 104116 / JCM 14847 / LMG 12228 / 1C / PRS 101 / PAO1) OX=208964 GN=pepN PE=3 SV=1	FALSE	FALSE	TRUE	12.3164	8	8	7	4.91838e+07	10.64
High	Q9I5A7	OmpA-like domain-containing protein OS=Pseudomonas aeruginosa (strain ATCC 15692 / DSM 22644 / CIP 104116 / JCM 14847 / LMG 12228 / 1C / PRS 101 / PAO1) OX=208964 GN=PA0833 PE=1 SV=1	FALSE	FALSE	TRUE	36.7089	5	5	5	1.48842e+08	8.19
High	O86428	Branched-chain-amino-acid aminotransferase OS=Pseudomonas aeruginosa (strain ATCC 15692 / DSM 22644 / CIP 104116 / JCM 14847 / LMG 12228 / 1C / PRS 101 / PAO1) OX=208964 GN=ilvE PE=1 SV=2	FALSE	FALSE	TRUE	24.1042	5	6	5	1.58864e+08	10.06
High	Q9HUD3	Malic enzyme OS=Pseudomonas aeruginosa (strain ATCC 15692 / DSM 22644 / CIP 104116 / JCM 14847 / LMG 12228 / 1C / PRS 101 / PAO1) OX=208964 GN=PA5046 PE=3 SV=1	FALSE	FALSE	TRUE	26.7773	9	9	9	1.45656e+08	12.88
High	Q9HXN2	Phosphoribosylformylglycinamidine synthase OS=Pseudomonas aeruginosa (strain ATCC 15692 / DSM 22644 / CIP 104116 / JCM 14847 / LMG 12228 / 1C / PRS 101 / PAO1) OX=208964 GN=purL PE=3 SV=1	FALSE	FALSE	TRUE	11.4022	9	10	9	2.02123e+07	4.1
High	P48247	Glutamate-1-semialdehyde 2,1-aminomutase OS=Pseudomonas aeruginosa (strain ATCC 15692 / DSM 22644 / CIP 104116 / JCM 14847 / LMG 12228 / 1C / PRS 101 / PAO1) OX=208964 GN=hemL PE=1 SV=2	FALSE	FALSE	TRUE	16.6276	4	4	4	1.09842e+08	9.81
High	Q9I0R1	Nitroreductase domain-containing protein OS=Pseudomonas aeruginosa (strain ATCC 15692 / DSM 22644 / CIP 104116 / JCM 14847 / LMG 12228 / 1C / PRS 101 / PAO1) OX=208964 GN=PA2575 PE=4 SV=1	FALSE	FALSE	TRUE	21	3	6	3	5.68238e+07	8.27
High	Q9I6M4	5-aminovalerate aminotransferase DavT OS=Pseudomonas aeruginosa (strain ATCC 15692 / DSM 22644 / CIP 104116 / JCM 14847 / LMG 12228 / 1C / PRS 101 / PAO1) OX=208964 GN=davT PE=1 SV=1	FALSE	FALSE	TRUE	31.6901	7	8	7	6.38852e+07	16.97
High	Q9HVU0	Cell shape-determining protein MreB OS=Pseudomonas aeruginosa (strain ATCC 15692 / DSM 22644 / CIP 104116 / JCM 14847 / LMG 12228 / 1C / PRS 101 / PAO1) OX=208964 GN=mreB PE=3 SV=1	FALSE	FALSE	TRUE	16.2319	5	7	5	1.84562e+07	11.53
High	Q9I690	UPF0312 protein PA0423 OS=Pseudomonas aeruginosa (strain ATCC 15692 / DSM 22644 / CIP 104116 / JCM 14847 / LMG 12228 / 1C / PRS 101 / PAO1) OX=208964 GN=PA0423 PE=3 SV=1	FALSE	FALSE	TRUE	21.466	3	6	3	9862408	8.72
High	Q9I0M6	Serine--tRNA ligase OS=Pseudomonas aeruginosa (strain ATCC 15692 / DSM 22644 / CIP 104116 / JCM 14847 / LMG 12228 / 1C / PRS 101 / PAO1) OX=208964 GN=serS PE=3 SV=1	FALSE	FALSE	TRUE	19.2488	6	7	6	3.56667e+07	5.94
High	Q9HTQ4	Cytochrome c5 OS=Pseudomonas aeruginosa (strain ATCC 15692 / DSM 22644 / CIP 104116 / JCM 14847 / LMG 12228 / 1C / PRS 101 / PAO1) OX=208964 GN=cycB PE=4 SV=1	FALSE	FALSE	TRUE	27.2059	3	5	3	5.09713e+06	12.41
High	Q9HU67	Regulatory protein TypA OS=Pseudomonas aeruginosa (strain ATCC 15692 / DSM 22644 / CIP 104116 / JCM 14847 / LMG 12228 / 1C / PRS 101 / PAO1) OX=208964 GN=typA PE=4 SV=1	FALSE	FALSE	TRUE	14.7107	6	8	5	54165807	8.7
High	Q59636	Nucleoside diphosphate kinase OS=Pseudomonas aeruginosa (strain ATCC 15692 / DSM 22644 / CIP 104116 / JCM 14847 / LMG 12228 / 1C / PRS 101 / PAO1) OX=208964 GN=ndk PE=1 SV=2	FALSE	FALSE	TRUE	39.8601	5	10	5	1.06499e+08	16.8
High	G3XD94	UDP-N-acetyl-D-glucosamine 6-dehydrogenase OS=Pseudomonas aeruginosa (strain ATCC 15692 / DSM 22644 / CIP 104116 / JCM 14847 / LMG 12228 / 1C / PRS 101 / PAO1) OX=208964 GN=wbpA PE=1 SV=1	FALSE	FALSE	TRUE	20.8716	6	6	6	3.89904e+07	10.74
High	Q9HUW8	Uncharacterized protein OS=Pseudomonas aeruginosa (strain ATCC 15692 / DSM 22644 / CIP 104116 / JCM 14847 / LMG 12228 / 1C / PRS 101 / PAO1) OX=208964 GN=PA4842 PE=4 SV=1	FALSE	FALSE	TRUE	22.7528	6	7	6	5.81446e+07	10.36
High	Q9HVL7	50S ribosomal protein L27 OS=Pseudomonas aeruginosa (strain ATCC 15692 / DSM 22644 / CIP 104116 / JCM 14847 / LMG 12228 / 1C / PRS 101 / PAO1) OX=208964 GN=rpmA PE=1 SV=3	FALSE	FALSE	TRUE	32.9412	3	7	3	6.73455e+07	2.33
High	Q9I2D5	Uncharacterized protein OS=Pseudomonas aeruginosa (strain ATCC 15692 / DSM 22644 / CIP 104116 / JCM 14847 / LMG 12228 / 1C / PRS 101 / PAO1) OX=208964 GN=PA1969 PE=4 SV=1	FALSE	FALSE	TRUE	30	3	5	3	1.62368e+07	6.83
High	Q9HXP9	30S ribosomal protein S16 OS=Pseudomonas aeruginosa (strain ATCC 15692 / DSM 22644 / CIP 104116 / JCM 14847 / LMG 12228 / 1C / PRS 101 / PAO1) OX=208964 GN=rpsP PE=3 SV=1	FALSE	FALSE	TRUE	49.3976	4	11	4	9.26713e+06	16.29
High	Q9LCT3	Protein translocase subunit SecA OS=Pseudomonas aeruginosa (strain ATCC 15692 / DSM 22644 / CIP 104116 / JCM 14847 / LMG 12228 / 1C / PRS 101 / PAO1) OX=208964 GN=secA PE=3 SV=1	FALSE	FALSE	TRUE	6.76856	4	6	4	2.52874e+07	11.03
High	Q9HVZ0	Phosphoheptose isomerase OS=Pseudomonas aeruginosa (strain ATCC 15692 / DSM 22644 / CIP 104116 / JCM 14847 / LMG 12228 / 1C / PRS 101 / PAO1) OX=208964 GN=gmhA PE=1 SV=1	FALSE	FALSE	TRUE	45.6853	4	6	4	6.15946e+07	7.63
High	P40947	Single-stranded DNA-binding protein OS=Pseudomonas aeruginosa (strain ATCC 15692 / DSM 22644 / CIP 104116 / JCM 14847 / LMG 12228 / 1C / PRS 101 / PAO1) OX=208964 GN=ssb PE=1 SV=3	FALSE	FALSE	TRUE	25.4545	6	8	6	1.67037e+08	11.82
High	Q9HV54	Transcription termination/antitermination protein NusA OS=Pseudomonas aeruginosa (strain ATCC 15692 / DSM 22644 / CIP 104116 / JCM 14847 / LMG 12228 / 1C / PRS 101 / PAO1) OX=208964 GN=nusA PE=3 SV=1	FALSE	FALSE	TRUE	14.8073	5	7	5	6.22592e+07	12.08
High	Q9HV37	L-lactate dehydrogenase OS=Pseudomonas aeruginosa (strain ATCC 15692 / DSM 22644 / CIP 104116 / JCM 14847 / LMG 12228 / 1C / PRS 101 / PAO1) OX=208964 GN=lldD PE=3 SV=1	FALSE	FALSE	TRUE	15.4856	5	7	1		6.49
High	G3XD76	2,3,4,5-tetrahydropyridine-2,6-dicarboxylate N-succinyltransferase OS=Pseudomonas aeruginosa (strain ATCC 15692 / DSM 22644 / CIP 104116 / JCM 14847 / LMG 12228 / 1C / PRS 101 / PAO1) OX=208964 GN=dapD PE=1 SV=1	FALSE	FALSE	TRUE	24.1279	6	9	6	1.31465e+08	12.16
High	Q9I4I2	Ribonucleoside-diphosphate reductase subunit beta OS=Pseudomonas aeruginosa (strain ATCC 15692 / DSM 22644 / CIP 104116 / JCM 14847 / LMG 12228 / 1C / PRS 101 / PAO1) OX=208964 GN=nrdB PE=3 SV=1	FALSE	FALSE	TRUE	19.2771	4	5	4	4.63044e+07	4.43
High	Q51390	Glycerol kinase 2 OS=Pseudomonas aeruginosa (strain ATCC 15692 / DSM 22644 / CIP 104116 / JCM 14847 / LMG 12228 / 1C / PRS 101 / PAO1) OX=208964 GN=glpK2 PE=3 SV=2	FALSE	FALSE	TRUE	15.8416	7	10	3	2.74355e+07	11.38
High	Q9HVT7	Aspartyl/glutamyl-tRNA(Asn/Gln) amidotransferase subunit B OS=Pseudomonas aeruginosa (strain ATCC 15692 / DSM 22644 / CIP 104116 / JCM 14847 / LMG 12228 / 1C / PRS 101 / PAO1) OX=208964 GN=gatB PE=1 SV=1	FALSE	FALSE	TRUE	17.0478	6	7	6	8.05156e+07	8.35
High	Q9HVY4	Ubiquinol-cytochrome c reductase iron-sulfur subunit OS=Pseudomonas aeruginosa (strain ATCC 15692 / DSM 22644 / CIP 104116 / JCM 14847 / LMG 12228 / 1C / PRS 101 / PAO1) OX=208964 GN=PA4431 PE=3 SV=1	FALSE	FALSE	TRUE	20.3046	3	5	3	4.66553e+08	4.32
High	Q9HTL4	OxyR OS=Pseudomonas aeruginosa (strain ATCC 15692 / DSM 22644 / CIP 104116 / JCM 14847 / LMG 12228 / 1C / PRS 101 / PAO1) OX=208964 GN=oxyR PE=1 SV=1	FALSE	FALSE	TRUE	31.6129	7	7	7	3.52862e+07	6.13
High	Q9I291	UTP--glucose-1-phosphate uridylyltransferase OS=Pseudomonas aeruginosa (strain ATCC 15692 / DSM 22644 / CIP 104116 / JCM 14847 / LMG 12228 / 1C / PRS 101 / PAO1) OX=208964 GN=galU PE=3 SV=1	FALSE	FALSE	TRUE	17.9211	3	4	3	1.51988e+08	8.11
High	Q9I4F9	Two-component response regulator PhoP OS=Pseudomonas aeruginosa (strain ATCC 15692 / DSM 22644 / CIP 104116 / JCM 14847 / LMG 12228 / 1C / PRS 101 / PAO1) OX=208964 GN=phoP PE=1 SV=1	FALSE	FALSE	TRUE	27.5556	4	5	4	4.22037e+07	7.8
High	P50587	Orotate phosphoribosyltransferase OS=Pseudomonas aeruginosa (strain ATCC 15692 / DSM 22644 / CIP 104116 / JCM 14847 / LMG 12228 / 1C / PRS 101 / PAO1) OX=208964 GN=pyrE PE=3 SV=2	FALSE	FALSE	TRUE	25.3521	4	5	3	4.50417e+07	5.22
High	Q9I5U2	LPS-assembly protein LptD OS=Pseudomonas aeruginosa (strain ATCC 15692 / DSM 22644 / CIP 104116 / JCM 14847 / LMG 12228 / 1C / PRS 101 / PAO1) OX=208964 GN=lptD PE=1 SV=1	FALSE	FALSE	TRUE	8.98268	6	6	6	3.55646e+07	6.75
High	Q9HU73	Fructose-1,6-bisphosphatase class 1 OS=Pseudomonas aeruginosa (strain ATCC 15692 / DSM 22644 / CIP 104116 / JCM 14847 / LMG 12228 / 1C / PRS 101 / PAO1) OX=208964 GN=fbp PE=3 SV=1	FALSE	FALSE	TRUE	22.0238	6	6	6	6.69133e+07	6.3
High	Q9HUM0	RNA-binding protein Hfq OS=Pseudomonas aeruginosa (strain ATCC 15692 / DSM 22644 / CIP 104116 / JCM 14847 / LMG 12228 / 1C / PRS 101 / PAO1) OX=208964 GN=hfq PE=1 SV=1	FALSE	FALSE	TRUE	65.8537	5	6	3	7.76807e+06	7.16
High	Q9I5V8	30S ribosomal protein S21 OS=Pseudomonas aeruginosa (strain ATCC 15692 / DSM 22644 / CIP 104116 / JCM 14847 / LMG 12228 / 1C / PRS 101 / PAO1) OX=208964 GN=rpsU PE=1 SV=3	FALSE	FALSE	TRUE	52.1127	6	11	3	7.15045e+07	8
High	Q9I099	Threonine--tRNA ligase OS=Pseudomonas aeruginosa (strain ATCC 15692 / DSM 22644 / CIP 104116 / JCM 14847 / LMG 12228 / 1C / PRS 101 / PAO1) OX=208964 GN=thrS PE=3 SV=1	FALSE	FALSE	TRUE	10	6	7	4	1.48851e+07	9.2
High	Q9I3B2	Beta-ketoacyl-ACP synthase I OS=Pseudomonas aeruginosa (strain ATCC 15692 / DSM 22644 / CIP 104116 / JCM 14847 / LMG 12228 / 1C / PRS 101 / PAO1) OX=208964 GN=fabB PE=3 SV=1	FALSE	FALSE	TRUE	23.9506	6	6	6	9.10454e+07	7.2
High	Q9HT21	ATP synthase epsilon chain OS=Pseudomonas aeruginosa (strain ATCC 15692 / DSM 22644 / CIP 104116 / JCM 14847 / LMG 12228 / 1C / PRS 101 / PAO1) OX=208964 GN=atpC PE=3 SV=1	FALSE	FALSE	TRUE	27.6596	4	7	4	4.13785e+07	16.16
High	Q9I636	Malate synthase G OS=Pseudomonas aeruginosa (strain ATCC 15692 / DSM 22644 / CIP 104116 / JCM 14847 / LMG 12228 / 1C / PRS 101 / PAO1) OX=208964 GN=glcB PE=1 SV=1	FALSE	FALSE	TRUE	8.13793	3	5	3	1.91091e+08	9.68
High	Q9I4W0	Phosphoribosylaminoimidazole-succinocarboxamide synthase OS=Pseudomonas aeruginosa (strain ATCC 15692 / DSM 22644 / CIP 104116 / JCM 14847 / LMG 12228 / 1C / PRS 101 / PAO1) OX=208964 GN=purC PE=3 SV=1	FALSE	FALSE	TRUE	27.9661	5	5	4	7.44101e+07	5.93
High	P72173	Aspartate aminotransferase OS=Pseudomonas aeruginosa (strain ATCC 15692 / DSM 22644 / CIP 104116 / JCM 14847 / LMG 12228 / 1C / PRS 101 / PAO1) OX=208964 GN=aspC PE=3 SV=2	FALSE	FALSE	TRUE	16.8342	4	5	4	4.66538e+07	9.35
High	Q9HTJ1	NAD/NADP-dependent betaine aldehyde dehydrogenase OS=Pseudomonas aeruginosa (strain ATCC 15692 / DSM 22644 / CIP 104116 / JCM 14847 / LMG 12228 / 1C / PRS 101 / PAO1) OX=208964 GN=betB PE=1 SV=1	FALSE	FALSE	TRUE	15.102	4	5	4	9.82541e+07	4.45
High	Q9HU11	Uncharacterized protein OS=Pseudomonas aeruginosa (strain ATCC 15692 / DSM 22644 / CIP 104116 / JCM 14847 / LMG 12228 / 1C / PRS 101 / PAO1) OX=208964 GN=PA5178 PE=4 SV=1	FALSE	FALSE	TRUE	41.3793	3	5	3	1.29511e+08	3.24
High	Q9I0A0	Translation initiation factor IF-3 OS=Pseudomonas aeruginosa (strain ATCC 15692 / DSM 22644 / CIP 104116 / JCM 14847 / LMG 12228 / 1C / PRS 101 / PAO1) OX=208964 GN=infC PE=3 SV=1	FALSE	FALSE	TRUE	38.7978	5	7	5	1.76041e+07	5.21
High	G3XD89	Putative copper transport outer membrane porin OprC OS=Pseudomonas aeruginosa (strain ATCC 15692 / DSM 22644 / CIP 104116 / JCM 14847 / LMG 12228 / 1C / PRS 101 / PAO1) OX=208964 GN=oprC PE=1 SV=1	FALSE	FALSE	TRUE	13.0014	6	6	6	5.75042e+07	6.94
High	P47205	UDP-3-O-acyl-N-acetylglucosamine deacetylase OS=Pseudomonas aeruginosa (strain ATCC 15692 / DSM 22644 / CIP 104116 / JCM 14847 / LMG 12228 / 1C / PRS 101 / PAO1) OX=208964 GN=lpxC PE=1 SV=2	FALSE	FALSE	TRUE	14.1914	3	4	3	7.94701e+07	8.01
High	Q9I0J7	NADH-quinone oxidoreductase subunit F OS=Pseudomonas aeruginosa (strain ATCC 15692 / DSM 22644 / CIP 104116 / JCM 14847 / LMG 12228 / 1C / PRS 101 / PAO1) OX=208964 GN=nuoF PE=3 SV=1	FALSE	FALSE	TRUE	15.625	6	8	2	9.42888e+06	6.61
High	Q9HWE2	50S ribosomal protein L16 OS=Pseudomonas aeruginosa (strain ATCC 15692 / DSM 22644 / CIP 104116 / JCM 14847 / LMG 12228 / 1C / PRS 101 / PAO1) OX=208964 GN=rplP PE=3 SV=1	FALSE	FALSE	TRUE	28.4672	4	6	4	178383215	10.06
High	Q9HVI7	Serine hydroxymethyltransferase 3 OS=Pseudomonas aeruginosa (strain ATCC 15692 / DSM 22644 / CIP 104116 / JCM 14847 / LMG 12228 / 1C / PRS 101 / PAO1) OX=208964 GN=glyA2 PE=3 SV=1	FALSE	FALSE	TRUE	20.3837	7	7	4	3.21708e+07	5.59
High	Q9HZZ2	Elongation factor P OS=Pseudomonas aeruginosa (strain ATCC 15692 / DSM 22644 / CIP 104116 / JCM 14847 / LMG 12228 / 1C / PRS 101 / PAO1) OX=208964 GN=efp PE=1 SV=1	FALSE	FALSE	TRUE	27.1277	4	6	4	1.4806e+08	6.59
High	Q9HXI8	Cysteine desulfurase IscS OS=Pseudomonas aeruginosa (strain ATCC 15692 / DSM 22644 / CIP 104116 / JCM 14847 / LMG 12228 / 1C / PRS 101 / PAO1) OX=208964 GN=iscS PE=3 SV=1	FALSE	FALSE	TRUE	14.1089	6	7	3	3.47755e+06	8.02
High	Q9I296	Putative isovaleryl-CoA dehydrogenase OS=Pseudomonas aeruginosa (strain ATCC 15692 / DSM 22644 / CIP 104116 / JCM 14847 / LMG 12228 / 1C / PRS 101 / PAO1) OX=208964 GN=liuA PE=3 SV=1	FALSE	FALSE	TRUE	13.4367	5	5	5	4.59298e+07	7.1
High	Q9I028	Acyl-coenzyme A dehydrogenase OS=Pseudomonas aeruginosa (strain ATCC 15692 / DSM 22644 / CIP 104116 / JCM 14847 / LMG 12228 / 1C / PRS 101 / PAO1) OX=208964 GN=PA2815 PE=3 SV=1	FALSE	FALSE	TRUE	12.7607	6	6	6	4.22324e+07	11.85
High	Q9HV46	Transcription elongation factor GreA OS=Pseudomonas aeruginosa (strain ATCC 15692 / DSM 22644 / CIP 104116 / JCM 14847 / LMG 12228 / 1C / PRS 101 / PAO1) OX=208964 GN=greA PE=3 SV=1	FALSE	FALSE	TRUE	29.1139	3	4	3	1.17963e+07	6.47
High	Q9I0J4	NADH-quinone oxidoreductase subunit I OS=Pseudomonas aeruginosa (strain ATCC 15692 / DSM 22644 / CIP 104116 / JCM 14847 / LMG 12228 / 1C / PRS 101 / PAO1) OX=208964 GN=nuoI PE=3 SV=1	FALSE	FALSE	TRUE	47.2527	5	6	3	9.25921e+07	10.29
High	Q9HYX8	Peptidyl-prolyl cis-trans isomerase OS=Pseudomonas aeruginosa (strain ATCC 15692 / DSM 22644 / CIP 104116 / JCM 14847 / LMG 12228 / 1C / PRS 101 / PAO1) OX=208964 GN=PA3262 PE=3 SV=1	FALSE	FALSE	TRUE	22.9249	4	6	4	3.57213e+07	10.53
High	Q9I6C1	Signal recognition particle receptor FtsY OS=Pseudomonas aeruginosa (strain ATCC 15692 / DSM 22644 / CIP 104116 / JCM 14847 / LMG 12228 / 1C / PRS 101 / PAO1) OX=208964 GN=ftsY PE=3 SV=1	FALSE	FALSE	TRUE	12.3077	3	4	3	1.50273e+06	10.45
High	Q9HWE8	30S ribosomal protein S14 OS=Pseudomonas aeruginosa (strain ATCC 15692 / DSM 22644 / CIP 104116 / JCM 14847 / LMG 12228 / 1C / PRS 101 / PAO1) OX=208964 GN=rpsN PE=3 SV=1	FALSE	FALSE	TRUE	37.6238	5	6	5	2.44376e+07	6.04
High	Q9I5I4	Probable enoyl-CoA hydratase/isomerase OS=Pseudomonas aeruginosa (strain ATCC 15692 / DSM 22644 / CIP 104116 / JCM 14847 / LMG 12228 / 1C / PRS 101 / PAO1) OX=208964 GN=PA0745 PE=1 SV=1	FALSE	FALSE	TRUE	25.7353	5	5	5	4.68408e+07	9.12
High	Q9HWD0	30S ribosomal protein S12 OS=Pseudomonas aeruginosa (strain ATCC 15692 / DSM 22644 / CIP 104116 / JCM 14847 / LMG 12228 / 1C / PRS 101 / PAO1) OX=208964 GN=rpsL PE=3 SV=1	FALSE	FALSE	TRUE	13.8211	2	5	2	6.36059e+06	7.68
High	P04739	Type IV major pilin protein PilA OS=Pseudomonas aeruginosa (strain ATCC 15692 / DSM 22644 / CIP 104116 / JCM 14847 / LMG 12228 / 1C / PRS 101 / PAO1) OX=208964 GN=pilA PE=1 SV=1	FALSE	FALSE	TRUE	35.5705	5	6	5	8.767e+08	12.89
High	Q9HXU0	Lysine--tRNA ligase OS=Pseudomonas aeruginosa (strain ATCC 15692 / DSM 22644 / CIP 104116 / JCM 14847 / LMG 12228 / 1C / PRS 101 / PAO1) OX=208964 GN=lysS PE=3 SV=1	FALSE	FALSE	TRUE	10.978	5	7	3	1.97974e+06	2.47
High	Q9I1M0	Lipoamide acyltransferase component of branched-chain alpha-keto acid dehydrogenase complex OS=Pseudomonas aeruginosa (strain ATCC 15692 / DSM 22644 / CIP 104116 / JCM 14847 / LMG 12228 / 1C / PRS 101 / PAO1) OX=208964 GN=bkdB PE=1 SV=1	FALSE	FALSE	TRUE	12.8505	5	6	5	1.29438e+07	9.46
High	G3XCZ6	Malonyl CoA-acyl carrier protein transacylase OS=Pseudomonas aeruginosa (strain ATCC 15692 / DSM 22644 / CIP 104116 / JCM 14847 / LMG 12228 / 1C / PRS 101 / PAO1) OX=208964 GN=fabD PE=3 SV=1	FALSE	FALSE	TRUE	15.3846	3	4	3	9.16615e+07	6.01
High	Q9HT17	ATP synthase subunit delta OS=Pseudomonas aeruginosa (strain ATCC 15692 / DSM 22644 / CIP 104116 / JCM 14847 / LMG 12228 / 1C / PRS 101 / PAO1) OX=208964 GN=atpH PE=3 SV=1	FALSE	FALSE	TRUE	26.9663	3	5	3	1.8991e+08	11.5
High	Q9HVJ1	Energy-dependent translational throttle protein EttA OS=Pseudomonas aeruginosa (strain ATCC 15692 / DSM 22644 / CIP 104116 / JCM 14847 / LMG 12228 / 1C / PRS 101 / PAO1) OX=208964 GN=ettA PE=3 SV=1	FALSE	FALSE	TRUE	15.5235	6	6	5	2.48532e+07	6.15
High	Q9I083	Probable outer membrane protein OS=Pseudomonas aeruginosa (strain ATCC 15692 / DSM 22644 / CIP 104116 / JCM 14847 / LMG 12228 / 1C / PRS 101 / PAO1) OX=208964 GN=PA2760 PE=3 SV=1	FALSE	FALSE	TRUE	6.35294	3	4	3	7.51193e+06	8.74
High	Q9HVF2	Uncharacterized protein OS=Pseudomonas aeruginosa (strain ATCC 15692 / DSM 22644 / CIP 104116 / JCM 14847 / LMG 12228 / 1C / PRS 101 / PAO1) OX=208964 GN=PA4639 PE=4 SV=1	FALSE	FALSE	TRUE	18.9744	3	4	3	4.02732e+07	4.64
High	Q9HT12	Probable chromosome-partitioning protein ParB OS=Pseudomonas aeruginosa (strain ATCC 15692 / DSM 22644 / CIP 104116 / JCM 14847 / LMG 12228 / 1C / PRS 101 / PAO1) OX=208964 GN=spoOJ PE=3 SV=1	FALSE	FALSE	TRUE	17.5862	4	4	4	4.81921e+07	6.45
High	Q9HTL9	Uncharacterized protein OS=Pseudomonas aeruginosa (strain ATCC 15692 / DSM 22644 / CIP 104116 / JCM 14847 / LMG 12228 / 1C / PRS 101 / PAO1) OX=208964 GN=PA5339 PE=3 SV=1	FALSE	FALSE	TRUE	47.619	5	5	5	1.27728e+08	3.79
High	Q9I558	Acetyl-coenzyme A synthetase 1 OS=Pseudomonas aeruginosa (strain ATCC 15692 / DSM 22644 / CIP 104116 / JCM 14847 / LMG 12228 / 1C / PRS 101 / PAO1) OX=208964 GN=acsA1 PE=3 SV=1	FALSE	FALSE	TRUE	11.3671	5	6	4	3.76635e+07	5.77
High	Q9I2B0	3-oxoadipate CoA-transferase OS=Pseudomonas aeruginosa (strain ATCC 15692 / DSM 22644 / CIP 104116 / JCM 14847 / LMG 12228 / 1C / PRS 101 / PAO1) OX=208964 GN=dhcA PE=3 SV=1	FALSE	FALSE	TRUE	16.3793	2	3	2	6.06984e+07	8.35
High	P47203	Cell division protein FtsA OS=Pseudomonas aeruginosa (strain ATCC 15692 / DSM 22644 / CIP 104116 / JCM 14847 / LMG 12228 / 1C / PRS 101 / PAO1) OX=208964 GN=ftsA PE=3 SV=2	FALSE	FALSE	TRUE	15.1079	4	6	4	1.61944e+07	1.88
High	Q9HUT3	Probable bacterioferritin OS=Pseudomonas aeruginosa (strain ATCC 15692 / DSM 22644 / CIP 104116 / JCM 14847 / LMG 12228 / 1C / PRS 101 / PAO1) OX=208964 GN=PA4880 PE=3 SV=1	FALSE	FALSE	TRUE	31.0734	4	4	4	1.35524e+07	9.8
High	G3XD23	UDP-N-acetyl-2-amino-2-deoxy-D-glucuronate oxidase OS=Pseudomonas aeruginosa (strain ATCC 15692 / DSM 22644 / CIP 104116 / JCM 14847 / LMG 12228 / 1C / PRS 101 / PAO1) OX=208964 GN=wbpB PE=1 SV=1	FALSE	FALSE	TRUE	20.8861	4	6	4	9.60162e+07	10.26
High	Q9HXM6	GMP synthase [glutamine-hydrolyzing] OS=Pseudomonas aeruginosa (strain ATCC 15692 / DSM 22644 / CIP 104116 / JCM 14847 / LMG 12228 / 1C / PRS 101 / PAO1) OX=208964 GN=guaA PE=3 SV=1	FALSE	FALSE	TRUE	12.1905	5	7	4	1.75833e+07	6.51
High	O54438	3-oxoacyl-[acyl-carrier-protein] reductase FabG OS=Pseudomonas aeruginosa (strain ATCC 15692 / DSM 22644 / CIP 104116 / JCM 14847 / LMG 12228 / 1C / PRS 101 / PAO1) OX=208964 GN=fabG PE=1 SV=1	FALSE	FALSE	TRUE	25.1012	5	7	5	1.04094e+08	9.51
High	Q9I6V6	Aerotaxis transducer Aer2 OS=Pseudomonas aeruginosa (strain ATCC 15692 / DSM 22644 / CIP 104116 / JCM 14847 / LMG 12228 / 1C / PRS 101 / PAO1) OX=208964 GN=aer2 PE=1 SV=1	FALSE	FALSE	TRUE	9.72018	4	4	4	7.97624e+06	9.78
High	Q9HUP4	Nicotinate phosphoribosyltransferase 1 OS=Pseudomonas aeruginosa (strain ATCC 15692 / DSM 22644 / CIP 104116 / JCM 14847 / LMG 12228 / 1C / PRS 101 / PAO1) OX=208964 GN=pncB1 PE=3 SV=1	FALSE	FALSE	TRUE	15.0376	5	5	5	5.8034e+07	7.88
High	Q9HUC0	Ubiquinone/menaquinone biosynthesis C-methyltransferase UbiE OS=Pseudomonas aeruginosa (strain ATCC 15692 / DSM 22644 / CIP 104116 / JCM 14847 / LMG 12228 / 1C / PRS 101 / PAO1) OX=208964 GN=ubiE PE=3 SV=1	FALSE	FALSE	TRUE	25	5	6	5	4.92208e+07	13.29
High	Q9HVF9	Peptidase_M48 domain-containing protein OS=Pseudomonas aeruginosa (strain ATCC 15692 / DSM 22644 / CIP 104116 / JCM 14847 / LMG 12228 / 1C / PRS 101 / PAO1) OX=208964 GN=PA4632 PE=3 SV=1	FALSE	FALSE	TRUE	16.8498	3	3	3	5.20812e+07	3.83
High	P72170	Dihydroorotase OS=Pseudomonas aeruginosa (strain ATCC 15692 / DSM 22644 / CIP 104116 / JCM 14847 / LMG 12228 / 1C / PRS 101 / PAO1) OX=208964 GN=pyrC PE=3 SV=2	FALSE	FALSE	TRUE	11.2069	2	3	2	1.88193e+07	5.03
High	Q9HVD1	Lipid A deacylase PagL OS=Pseudomonas aeruginosa (strain ATCC 15692 / DSM 22644 / CIP 104116 / JCM 14847 / LMG 12228 / 1C / PRS 101 / PAO1) OX=208964 GN=pagL PE=1 SV=1	FALSE	FALSE	TRUE	27.1676	3	5	3	1.16128e+08	10.24
High	P48372	DNA gyrase subunit A OS=Pseudomonas aeruginosa (strain ATCC 15692 / DSM 22644 / CIP 104116 / JCM 14847 / LMG 12228 / 1C / PRS 101 / PAO1) OX=208964 GN=gyrA PE=3 SV=1	FALSE	FALSE	TRUE	5.85049	4	4	4	1.92808e+07	6.74
High	Q9HW32	Insulin-cleaving metalloproteinase outer membrane protein OS=Pseudomonas aeruginosa (strain ATCC 15692 / DSM 22644 / CIP 104116 / JCM 14847 / LMG 12228 / 1C / PRS 101 / PAO1) OX=208964 GN=icmP PE=4 SV=1	FALSE	FALSE	TRUE	13.0045	3	4	3	1.84283e+07	4.38
High	Q9I3G7	Uncharacterized protein OS=Pseudomonas aeruginosa (strain ATCC 15692 / DSM 22644 / CIP 104116 / JCM 14847 / LMG 12228 / 1C / PRS 101 / PAO1) OX=208964 GN=PA1550 PE=4 SV=1	FALSE	FALSE	TRUE	23.4637	3	4	3	1.52451e+07	4.8
High	Q9HT16	ATP synthase subunit b OS=Pseudomonas aeruginosa (strain ATCC 15692 / DSM 22644 / CIP 104116 / JCM 14847 / LMG 12228 / 1C / PRS 101 / PAO1) OX=208964 GN=atpF PE=3 SV=1	FALSE	FALSE	TRUE	21.7949	3	4	3	4.5891e+07	1.87
High	Q9I2U0	ATP-dependent Clp protease ATP-binding subunit ClpX OS=Pseudomonas aeruginosa (strain ATCC 15692 / DSM 22644 / CIP 104116 / JCM 14847 / LMG 12228 / 1C / PRS 101 / PAO1) OX=208964 GN=clpX PE=3 SV=1	FALSE	FALSE	TRUE	17.8404	7	7	4	1.14672e+07	5.78
High	Q9HWF1	50S ribosomal protein L18 OS=Pseudomonas aeruginosa (strain ATCC 15692 / DSM 22644 / CIP 104116 / JCM 14847 / LMG 12228 / 1C / PRS 101 / PAO1) OX=208964 GN=rplR PE=3 SV=1	FALSE	FALSE	TRUE	43.9655	4	5	4	4.58343e+08	6.92
High	Q9I671	Glutaryl-CoA dehydrogenase OS=Pseudomonas aeruginosa (strain ATCC 15692 / DSM 22644 / CIP 104116 / JCM 14847 / LMG 12228 / 1C / PRS 101 / PAO1) OX=208964 GN=gcdH PE=3 SV=1	FALSE	FALSE	TRUE	17.5573	4	5	4	7.60529e+07	5.99
High	G3XCU6	Transcriptional regulator CysB OS=Pseudomonas aeruginosa (strain ATCC 15692 / DSM 22644 / CIP 104116 / JCM 14847 / LMG 12228 / 1C / PRS 101 / PAO1) OX=208964 GN=cysB PE=3 SV=1	FALSE	FALSE	TRUE	16.9753	4	4	4	5.84045e+07	4.11
High	Q9I2R2	Probable oxidoreductase OS=Pseudomonas aeruginosa (strain ATCC 15692 / DSM 22644 / CIP 104116 / JCM 14847 / LMG 12228 / 1C / PRS 101 / PAO1) OX=208964 GN=PA1833 PE=4 SV=1	FALSE	FALSE	TRUE	23.0303	5	5	5	4.10777e+07	5.85
High	Q9I6M5	Glutarate-semialdehyde dehydrogenase OS=Pseudomonas aeruginosa (strain ATCC 15692 / DSM 22644 / CIP 104116 / JCM 14847 / LMG 12228 / 1C / PRS 101 / PAO1) OX=208964 GN=davD PE=1 SV=1	FALSE	FALSE	TRUE	13.2505	4	4	4	4.2172e+07	2.5
High	Q9HYX7	Recombination-associated protein RdgC OS=Pseudomonas aeruginosa (strain ATCC 15692 / DSM 22644 / CIP 104116 / JCM 14847 / LMG 12228 / 1C / PRS 101 / PAO1) OX=208964 GN=rdgC PE=1 SV=1	FALSE	FALSE	TRUE	25.4902	5	5	5	5.22417e+07	7.69
High	Q9HXZ4	CTP synthase OS=Pseudomonas aeruginosa (strain ATCC 15692 / DSM 22644 / CIP 104116 / JCM 14847 / LMG 12228 / 1C / PRS 101 / PAO1) OX=208964 GN=pyrG PE=3 SV=1	FALSE	FALSE	TRUE	5.16605	2	3	2	3.14306e+07	7.59
High	Q9HZ76	UDP-2-acetamido-2-deoxy-3-oxo-D-glucuronate aminotransferase OS=Pseudomonas aeruginosa (strain ATCC 15692 / DSM 22644 / CIP 104116 / JCM 14847 / LMG 12228 / 1C / PRS 101 / PAO1) OX=208964 GN=wbpE PE=1 SV=1	FALSE	FALSE	TRUE	15.8774	4	5	4	2.28501e+07	8.06
High	P43898	Oxygen-dependent coproporphyrinogen-III oxidase OS=Pseudomonas aeruginosa (strain ATCC 15692 / DSM 22644 / CIP 104116 / JCM 14847 / LMG 12228 / 1C / PRS 101 / PAO1) OX=208964 GN=hemF PE=3 SV=1	FALSE	FALSE	TRUE	13.4426	3	4	3	6.32756e+06	6.41
High	Q9HV42	Protein GrpE OS=Pseudomonas aeruginosa (strain ATCC 15692 / DSM 22644 / CIP 104116 / JCM 14847 / LMG 12228 / 1C / PRS 101 / PAO1) OX=208964 GN=grpE PE=3 SV=1	FALSE	FALSE	TRUE	31.1828	4	5	4	1.22977e+08	6.05
High	Q9I0H1	Uncharacterized protein OS=Pseudomonas aeruginosa (strain ATCC 15692 / DSM 22644 / CIP 104116 / JCM 14847 / LMG 12228 / 1C / PRS 101 / PAO1) OX=208964 GN=PA2667 PE=4 SV=1	FALSE	FALSE	TRUE	23.9316	3	3	3	6.17094e+07	4.25
High	P08280	Protein RecA OS=Pseudomonas aeruginosa (strain ATCC 15692 / DSM 22644 / CIP 104116 / JCM 14847 / LMG 12228 / 1C / PRS 101 / PAO1) OX=208964 GN=recA PE=3 SV=1	FALSE	FALSE	TRUE	16.474	4	4	2	2.27515e+06	6.36
High	Q9HZG8	Uncharacterized protein OS=Pseudomonas aeruginosa (strain ATCC 15692 / DSM 22644 / CIP 104116 / JCM 14847 / LMG 12228 / 1C / PRS 101 / PAO1) OX=208964 GN=PA3040 PE=3 SV=1	FALSE	FALSE	TRUE	38.5321	2	4	2	2.06146e+08	6.37
High	Q9HWE9	30S ribosomal protein S8 OS=Pseudomonas aeruginosa (strain ATCC 15692 / DSM 22644 / CIP 104116 / JCM 14847 / LMG 12228 / 1C / PRS 101 / PAO1) OX=208964 GN=rpsH PE=3 SV=1	FALSE	FALSE	TRUE	29.2308	3	5	3	9.72112e+07	4.08
High	Q9HYQ8	ADP-L-glycero-D-manno-heptose-6-epimerase OS=Pseudomonas aeruginosa (strain ATCC 15692 / DSM 22644 / CIP 104116 / JCM 14847 / LMG 12228 / 1C / PRS 101 / PAO1) OX=208964 GN=hldD PE=3 SV=2	FALSE	FALSE	TRUE	15.4545	4	4	3	2.23317e+06	7.54
High	Q9I7A7	LysM domain-containing protein OS=Pseudomonas aeruginosa (strain ATCC 15692 / DSM 22644 / CIP 104116 / JCM 14847 / LMG 12228 / 1C / PRS 101 / PAO1) OX=208964 GN=PA0020 PE=4 SV=1	FALSE	FALSE	TRUE	17.5953	3	3	3	4.02911e+07	2.1
High	Q9I402	Probable binding protein component of ABC transporter OS=Pseudomonas aeruginosa (strain ATCC 15692 / DSM 22644 / CIP 104116 / JCM 14847 / LMG 12228 / 1C / PRS 101 / PAO1) OX=208964 GN=PA1342 PE=4 SV=1	FALSE	FALSE	TRUE	22.1854	5	6	5	1.30158e+07	7.24
High	Q9HWC4	Transcription termination/antitermination protein NusG OS=Pseudomonas aeruginosa (strain ATCC 15692 / DSM 22644 / CIP 104116 / JCM 14847 / LMG 12228 / 1C / PRS 101 / PAO1) OX=208964 GN=nusG PE=3 SV=1	FALSE	FALSE	TRUE	25.9887	3	5	3	5.11763e+07	6.74
High	Q9I5U3	Chaperone SurA OS=Pseudomonas aeruginosa (strain ATCC 15692 / DSM 22644 / CIP 104116 / JCM 14847 / LMG 12228 / 1C / PRS 101 / PAO1) OX=208964 GN=surA PE=3 SV=2	FALSE	FALSE	TRUE	10.7914	4	4	4	2.79833e+07	7.62
High	Q9HZA7	Acetyl-coenzyme A carboxylase carboxyl transferase subunit beta OS=Pseudomonas aeruginosa (strain ATCC 15692 / DSM 22644 / CIP 104116 / JCM 14847 / LMG 12228 / 1C / PRS 101 / PAO1) OX=208964 GN=accD PE=1 SV=1	FALSE	FALSE	TRUE	13.4483	3	4	2	2.39294e+07	2.37
High	Q9I5Y1	Fructose-bisphosphate aldolase OS=Pseudomonas aeruginosa (strain ATCC 15692 / DSM 22644 / CIP 104116 / JCM 14847 / LMG 12228 / 1C / PRS 101 / PAO1) OX=208964 GN=fba PE=3 SV=1	FALSE	FALSE	TRUE	13.5593	3	4	3	6.52795e+06	5.55
High	P77915	Oxygen-independent coproporphyrinogen III oxidase OS=Pseudomonas aeruginosa (strain ATCC 15692 / DSM 22644 / CIP 104116 / JCM 14847 / LMG 12228 / 1C / PRS 101 / PAO1) OX=208964 GN=hemN PE=2 SV=2	FALSE	FALSE	TRUE	14.5652	5	5	5	2.0902e+07	6.53
High	Q9HTN8	50S ribosomal protein L28 OS=Pseudomonas aeruginosa (strain ATCC 15692 / DSM 22644 / CIP 104116 / JCM 14847 / LMG 12228 / 1C / PRS 101 / PAO1) OX=208964 GN=rpmB PE=3 SV=1	FALSE	FALSE	TRUE	52.5641	4	7	3	5.46125e+08	11.45
High	Q9HVZ2	Uncharacterized protein OS=Pseudomonas aeruginosa (strain ATCC 15692 / DSM 22644 / CIP 104116 / JCM 14847 / LMG 12228 / 1C / PRS 101 / PAO1) OX=208964 GN=PA4423 PE=4 SV=1	FALSE	FALSE	TRUE	13.245	3	3	3	5.56677e+07	5.47
High	Q9HW68	Fumarate hydratase class I OS=Pseudomonas aeruginosa (strain ATCC 15692 / DSM 22644 / CIP 104116 / JCM 14847 / LMG 12228 / 1C / PRS 101 / PAO1) OX=208964 GN=PA4333 PE=3 SV=1	FALSE	FALSE	TRUE	21.1045	4	5	4	5.681e+07	10.41
High	Q9HUM3	Protein HflC OS=Pseudomonas aeruginosa (strain ATCC 15692 / DSM 22644 / CIP 104116 / JCM 14847 / LMG 12228 / 1C / PRS 101 / PAO1) OX=208964 GN=hflC PE=3 SV=1	FALSE	FALSE	TRUE	18.3391	5	5	5	7.04647e+07	5.38
High	P26275	Positive alginate biosynthesis regulatory protein OS=Pseudomonas aeruginosa (strain ATCC 15692 / DSM 22644 / CIP 104116 / JCM 14847 / LMG 12228 / 1C / PRS 101 / PAO1) OX=208964 GN=algR PE=3 SV=1	FALSE	FALSE	TRUE	16.5323	3	3	3	5.52073e+07	3.99
High	Q9HY84	Argininosuccinate synthase OS=Pseudomonas aeruginosa (strain ATCC 15692 / DSM 22644 / CIP 104116 / JCM 14847 / LMG 12228 / 1C / PRS 101 / PAO1) OX=208964 GN=argG PE=3 SV=1	FALSE	FALSE	TRUE	16.7901	4	4	4	1.17675e+08	5.44
High	G3XD47	Arginine/ornithine binding protein AotJ OS=Pseudomonas aeruginosa (strain ATCC 15692 / DSM 22644 / CIP 104116 / JCM 14847 / LMG 12228 / 1C / PRS 101 / PAO1) OX=208964 GN=aotJ PE=3 SV=1	FALSE	FALSE	TRUE	13.8996	2	3	2	2.07081e+07	4.54
High	Q9I2U6	Bifunctional protein FolD OS=Pseudomonas aeruginosa (strain ATCC 15692 / DSM 22644 / CIP 104116 / JCM 14847 / LMG 12228 / 1C / PRS 101 / PAO1) OX=208964 GN=folD PE=1 SV=1	FALSE	FALSE	TRUE	11.2676	2	3	2	1.56615e+07	4.85
High	Q9HUC5	ATP-dependent protease ATPase subunit HslU OS=Pseudomonas aeruginosa (strain ATCC 15692 / DSM 22644 / CIP 104116 / JCM 14847 / LMG 12228 / 1C / PRS 101 / PAO1) OX=208964 GN=hslU PE=3 SV=1	FALSE	FALSE	TRUE	9.8434	4	4	1	2.08786e+07	6.05
High	Q9HTD7	Aspartate ammonia-lyase OS=Pseudomonas aeruginosa (strain ATCC 15692 / DSM 22644 / CIP 104116 / JCM 14847 / LMG 12228 / 1C / PRS 101 / PAO1) OX=208964 GN=aspA PE=3 SV=1	FALSE	FALSE	TRUE	11.1814	3	4	2	2.31866e+06	5.06
High	Q9HVL6	50S ribosomal protein L21 OS=Pseudomonas aeruginosa (strain ATCC 15692 / DSM 22644 / CIP 104116 / JCM 14847 / LMG 12228 / 1C / PRS 101 / PAO1) OX=208964 GN=rplU PE=3 SV=1	FALSE	FALSE	TRUE	44.6602	5	5	5	2.68184e+07	4.31
High	Q9HWF3	50S ribosomal protein L30 OS=Pseudomonas aeruginosa (strain ATCC 15692 / DSM 22644 / CIP 104116 / JCM 14847 / LMG 12228 / 1C / PRS 101 / PAO1) OX=208964 GN=rpmD PE=1 SV=3	FALSE	FALSE	TRUE	25.8621	2	3	2	1.16603e+06	6.41
High	Q9HTN9	50S ribosomal protein L33 OS=Pseudomonas aeruginosa (strain ATCC 15692 / DSM 22644 / CIP 104116 / JCM 14847 / LMG 12228 / 1C / PRS 101 / PAO1) OX=208964 GN=rpmG PE=1 SV=1	FALSE	FALSE	TRUE	35.2941	2	3	2	965539	2.19
High	Q9HWF7	30S ribosomal protein S13 OS=Pseudomonas aeruginosa (strain ATCC 15692 / DSM 22644 / CIP 104116 / JCM 14847 / LMG 12228 / 1C / PRS 101 / PAO1) OX=208964 GN=rpsM PE=3 SV=1	FALSE	FALSE	TRUE	37.2881	3	7	2	4.85007e+08	12.31
High	Q9I765	Oligopeptidase A OS=Pseudomonas aeruginosa (strain ATCC 15692 / DSM 22644 / CIP 104116 / JCM 14847 / LMG 12228 / 1C / PRS 101 / PAO1) OX=208964 GN=prlC PE=3 SV=1	FALSE	FALSE	TRUE	5.87372	3	3	3	7.34971e+06	2.72
High	Q9HXR8	Probable FMN oxidoreductase OS=Pseudomonas aeruginosa (strain ATCC 15692 / DSM 22644 / CIP 104116 / JCM 14847 / LMG 12228 / 1C / PRS 101 / PAO1) OX=208964 GN=PA3723 PE=4 SV=1	FALSE	FALSE	TRUE	14.6739	4	4	4	4.61575e+07	1.77
High	Q9HT95	Acetyltransferase PA5475 OS=Pseudomonas aeruginosa (strain ATCC 15692 / DSM 22644 / CIP 104116 / JCM 14847 / LMG 12228 / 1C / PRS 101 / PAO1) OX=208964 GN=PA5475 PE=4 SV=1	FALSE	FALSE	TRUE	23.1183	3	3	3	2.49029e+08	3.88
High	Q9I5A3	Peptidyl-prolyl cis-trans isomerase OS=Pseudomonas aeruginosa (strain ATCC 15692 / DSM 22644 / CIP 104116 / JCM 14847 / LMG 12228 / 1C / PRS 101 / PAO1) OX=208964 GN=slyD PE=3 SV=1	FALSE	FALSE	TRUE	24.2236	2	4	2	3.69521e+06	10.34
High	Q9HW65	DJ-1_PfpI domain-containing protein OS=Pseudomonas aeruginosa (strain ATCC 15692 / DSM 22644 / CIP 104116 / JCM 14847 / LMG 12228 / 1C / PRS 101 / PAO1) OX=208964 GN=PA4336 PE=3 SV=1	FALSE	FALSE	TRUE	23.1959	3	3	3	2.63116e+07	5.11
High	P38103	4-hydroxy-tetrahydrodipicolinate reductase OS=Pseudomonas aeruginosa (strain ATCC 15692 / DSM 22644 / CIP 104116 / JCM 14847 / LMG 12228 / 1C / PRS 101 / PAO1) OX=208964 GN=dapB PE=1 SV=2	FALSE	FALSE	TRUE	29.1045	4	4	4	2.17214e+07	9.8
High	Q9I6L3	Peptidase_M48 domain-containing protein OS=Pseudomonas aeruginosa (strain ATCC 15692 / DSM 22644 / CIP 104116 / JCM 14847 / LMG 12228 / 1C / PRS 101 / PAO1) OX=208964 GN=PA0277 PE=3 SV=1	FALSE	FALSE	TRUE	15.873	3	3	3	2.29587e+07	6.23
High	Q9HU43	1-(5-phosphoribosyl)-5-[(5-phosphoribosylamino)methylideneamino] imidazole-4-carboxamide isomerase OS=Pseudomonas aeruginosa (strain ATCC 15692 / DSM 22644 / CIP 104116 / JCM 14847 / LMG 12228 / 1C / PRS 101 / PAO1) OX=208964 GN=hisA PE=3 SV=1	FALSE	FALSE	TRUE	13.0612	3	3	3	3.92709e+07	3.82
High	P57112	Soluble pyridine nucleotide transhydrogenase OS=Pseudomonas aeruginosa (strain ATCC 15692 / DSM 22644 / CIP 104116 / JCM 14847 / LMG 12228 / 1C / PRS 101 / PAO1) OX=208964 GN=sthA PE=1 SV=2	FALSE	FALSE	TRUE	16.3793	5	5	5	1.57794e+07	3.98
High	P65116	Translation initiation factor IF-1 OS=Pseudomonas aeruginosa (strain ATCC 15692 / DSM 22644 / CIP 104116 / JCM 14847 / LMG 12228 / 1C / PRS 101 / PAO1) OX=208964 GN=infA PE=1 SV=1	FALSE	FALSE	TRUE	38.8889	2	3	1	4.70326e+06	3.67
High	Q9HYC7	Methionine--tRNA ligase OS=Pseudomonas aeruginosa (strain ATCC 15692 / DSM 22644 / CIP 104116 / JCM 14847 / LMG 12228 / 1C / PRS 101 / PAO1) OX=208964 GN=metG PE=3 SV=1	FALSE	FALSE	TRUE	8.86263	4	4	4	1.66022e+07	3.43
High	Q9HTT7	Uncharacterized protein OS=Pseudomonas aeruginosa (strain ATCC 15692 / DSM 22644 / CIP 104116 / JCM 14847 / LMG 12228 / 1C / PRS 101 / PAO1) OX=208964 GN=PA5258 PE=4 SV=1	FALSE	FALSE	TRUE	13.5638	3	4	3	1.75522e+07	6.15
High	G3XD72	Probable purine-binding chemotaxis protein OS=Pseudomonas aeruginosa (strain ATCC 15692 / DSM 22644 / CIP 104116 / JCM 14847 / LMG 12228 / 1C / PRS 101 / PAO1) OX=208964 GN=PA1464 PE=4 SV=1	FALSE	FALSE	TRUE	30.1887	3	3	3	3.18144e+07	4.52
High	O85732	Methionyl-tRNA formyltransferase OS=Pseudomonas aeruginosa (strain ATCC 15692 / DSM 22644 / CIP 104116 / JCM 14847 / LMG 12228 / 1C / PRS 101 / PAO1) OX=208964 GN=fmt PE=1 SV=1	FALSE	FALSE	TRUE	12.1019	2	2	2	1.86423e+07	4.42
High	Q51344	Aspartate-semialdehyde dehydrogenase OS=Pseudomonas aeruginosa (strain ATCC 15692 / DSM 22644 / CIP 104116 / JCM 14847 / LMG 12228 / 1C / PRS 101 / PAO1) OX=208964 GN=asd PE=1 SV=2	FALSE	FALSE	TRUE	17.027	5	5	4	6.46555e+07	5.35
High	Q9HZH7	Molybdenum cofactor biosynthesis protein B OS=Pseudomonas aeruginosa (strain ATCC 15692 / DSM 22644 / CIP 104116 / JCM 14847 / LMG 12228 / 1C / PRS 101 / PAO1) OX=208964 GN=moaB2 PE=3 SV=1	FALSE	FALSE	TRUE	34.6369	3	3	3	9.5767e+06	5.36
High	P50598	Tol-Pal system protein TolQ OS=Pseudomonas aeruginosa (strain ATCC 15692 / DSM 22644 / CIP 104116 / JCM 14847 / LMG 12228 / 1C / PRS 101 / PAO1) OX=208964 GN=tolQ PE=3 SV=1	FALSE	FALSE	TRUE	13.4199	2	2	2	5.37759e+07	2.61
High	Q9ZFK4	2-dehydro-3-deoxyphosphooctonate aldolase OS=Pseudomonas aeruginosa (strain ATCC 15692 / DSM 22644 / CIP 104116 / JCM 14847 / LMG 12228 / 1C / PRS 101 / PAO1) OX=208964 GN=kdsA PE=1 SV=1	FALSE	FALSE	TRUE	19.2171	4	5	3	2.18143e+07	5.09
High	Q9HV44	Chaperone protein DnaJ OS=Pseudomonas aeruginosa (strain ATCC 15692 / DSM 22644 / CIP 104116 / JCM 14847 / LMG 12228 / 1C / PRS 101 / PAO1) OX=208964 GN=dnaJ PE=3 SV=1	FALSE	FALSE	TRUE	10.0796	2	3	2	3.62833e+07	4.92
High	Q9HV58	30S ribosomal protein S15 OS=Pseudomonas aeruginosa (strain ATCC 15692 / DSM 22644 / CIP 104116 / JCM 14847 / LMG 12228 / 1C / PRS 101 / PAO1) OX=208964 GN=rpsO PE=3 SV=1	FALSE	FALSE	TRUE	42.6966	4	6	2	2.48649e+08	4.51
High	Q9I1I5	Glucose dehydrogenase OS=Pseudomonas aeruginosa (strain ATCC 15692 / DSM 22644 / CIP 104116 / JCM 14847 / LMG 12228 / 1C / PRS 101 / PAO1) OX=208964 GN=gcd PE=3 SV=1	FALSE	FALSE	TRUE	4.98132	3	3	3	8.63343e+06	4.24
High	Q9HYP7	Probable chemotaxis protein OS=Pseudomonas aeruginosa (strain ATCC 15692 / DSM 22644 / CIP 104116 / JCM 14847 / LMG 12228 / 1C / PRS 101 / PAO1) OX=208964 GN=PA3349 PE=4 SV=1	FALSE	FALSE	TRUE	16.129	4	5	4	97086528	5.98
High	Q9HUA5	Glucans biosynthesis protein G OS=Pseudomonas aeruginosa (strain ATCC 15692 / DSM 22644 / CIP 104116 / JCM 14847 / LMG 12228 / 1C / PRS 101 / PAO1) OX=208964 GN=opgG PE=3 SV=1	FALSE	FALSE	TRUE	12.1905	4	5	3	7.19571e+06	4.6
High	Q9I2T8	Peptidylprolyl isomerase OS=Pseudomonas aeruginosa (strain ATCC 15692 / DSM 22644 / CIP 104116 / JCM 14847 / LMG 12228 / 1C / PRS 101 / PAO1) OX=208964 GN=ppiD PE=4 SV=1	FALSE	FALSE	TRUE	6.76329	3	3	3	1.8406e+07	5.31
High	Q9HT14	ATP synthase subunit a OS=Pseudomonas aeruginosa (strain ATCC 15692 / DSM 22644 / CIP 104116 / JCM 14847 / LMG 12228 / 1C / PRS 101 / PAO1) OX=208964 GN=atpB PE=3 SV=1	FALSE	FALSE	TRUE	14.8789	3	3	3	1.15848e+07	2.37
High	Q9HVV6	Lipopolysaccharide export system ATP-binding protein LptB OS=Pseudomonas aeruginosa (strain ATCC 15692 / DSM 22644 / CIP 104116 / JCM 14847 / LMG 12228 / 1C / PRS 101 / PAO1) OX=208964 GN=PA4461 PE=1 SV=1	FALSE	FALSE	TRUE	15.7676	3	3	3	1.95213e+07	2.21
High	Q9HZL4	Probable phosphodiesterase OS=Pseudomonas aeruginosa (strain ATCC 15692 / DSM 22644 / CIP 104116 / JCM 14847 / LMG 12228 / 1C / PRS 101 / PAO1) OX=208964 GN=PA2990 PE=4 SV=1	FALSE	FALSE	TRUE	11.6667	2	2	2	4.94686e+06	5.57
High	Q9I5A5	Phosphate acetyltransferase OS=Pseudomonas aeruginosa (strain ATCC 15692 / DSM 22644 / CIP 104116 / JCM 14847 / LMG 12228 / 1C / PRS 101 / PAO1) OX=208964 GN=pta PE=1 SV=1	FALSE	FALSE	TRUE	8.66477	3	4	3	9.56436e+06	6.55
High	Q9I0A2	50S ribosomal protein L20 OS=Pseudomonas aeruginosa (strain ATCC 15692 / DSM 22644 / CIP 104116 / JCM 14847 / LMG 12228 / 1C / PRS 101 / PAO1) OX=208964 GN=rplT PE=3 SV=1	FALSE	FALSE	TRUE	16.9492	3	7	3	3.24138e+08	12.7
High	Q9HTP2	Probable aldehyde dehydrogenase OS=Pseudomonas aeruginosa (strain ATCC 15692 / DSM 22644 / CIP 104116 / JCM 14847 / LMG 12228 / 1C / PRS 101 / PAO1) OX=208964 GN=PA5312 PE=1 SV=1	FALSE	FALSE	TRUE	7.84708	3	4	3	3.22655e+06	4.54
High	Q9I2R5	SCP2 domain-containing protein OS=Pseudomonas aeruginosa (strain ATCC 15692 / DSM 22644 / CIP 104116 / JCM 14847 / LMG 12228 / 1C / PRS 101 / PAO1) OX=208964 GN=PA1830 PE=4 SV=1	FALSE	FALSE	TRUE	16.3462	1	2	1	7.16537e+06	5.12
High	Q9I0K9	Adenylosuccinate lyase OS=Pseudomonas aeruginosa (strain ATCC 15692 / DSM 22644 / CIP 104116 / JCM 14847 / LMG 12228 / 1C / PRS 101 / PAO1) OX=208964 GN=purB PE=3 SV=1	FALSE	FALSE	TRUE	14.0351	4	4	4	1.86632e+07	2.28
High	P72157	N5-carboxyaminoimidazole ribonucleotide mutase OS=Pseudomonas aeruginosa (strain ATCC 15692 / DSM 22644 / CIP 104116 / JCM 14847 / LMG 12228 / 1C / PRS 101 / PAO1) OX=208964 GN=purE PE=3 SV=2	FALSE	FALSE	TRUE	29.4479	4	4	4	7.82831e+06	5.51
High	Q9HZ15	Probable transcriptional regulator OS=Pseudomonas aeruginosa (strain ATCC 15692 / DSM 22644 / CIP 104116 / JCM 14847 / LMG 12228 / 1C / PRS 101 / PAO1) OX=208964 GN=PA3225 PE=3 SV=1	FALSE	FALSE	TRUE	12.945	3	3	3	1.41237e+07	4.81
High	Q9I2U1	ATP-dependent Clp protease proteolytic subunit 1 OS=Pseudomonas aeruginosa (strain ATCC 15692 / DSM 22644 / CIP 104116 / JCM 14847 / LMG 12228 / 1C / PRS 101 / PAO1) OX=208964 GN=clpP1 PE=3 SV=1	FALSE	FALSE	TRUE	11.2676	2	4	2	3.18311e+06	1.99
High	Q9HVT2	Alpha-2-macroglobulin homolog OS=Pseudomonas aeruginosa (strain ATCC 15692 / DSM 22644 / CIP 104116 / JCM 14847 / LMG 12228 / 1C / PRS 101 / PAO1) OX=208964 GN=PA4489 PE=3 SV=1	FALSE	FALSE	TRUE	1.91293	2	2	2	2.06573e+07	4.12
High	O54439	Acyl carrier protein 1 OS=Pseudomonas aeruginosa (strain ATCC 15692 / DSM 22644 / CIP 104116 / JCM 14847 / LMG 12228 / 1C / PRS 101 / PAO1) OX=208964 GN=acpP1 PE=3 SV=4	FALSE	FALSE	TRUE	20.5128	1	2	1	1841861452	4.58
High	Q9HYI7	Leucine dehydrogenase OS=Pseudomonas aeruginosa (strain ATCC 15692 / DSM 22644 / CIP 104116 / JCM 14847 / LMG 12228 / 1C / PRS 101 / PAO1) OX=208964 GN=ldh PE=3 SV=1	FALSE	FALSE	TRUE	9.09091	2	2	2	4.96836e+06	4.43
High	Q9HZP8	Enoyl-[acyl-carrier-protein] reductase [NADH] OS=Pseudomonas aeruginosa (strain ATCC 15692 / DSM 22644 / CIP 104116 / JCM 14847 / LMG 12228 / 1C / PRS 101 / PAO1) OX=208964 GN=fabV PE=1 SV=1	FALSE	FALSE	TRUE	7.28643	2	3	2	1.05363e+07	4.37
High	Q9HWG0	UvrABC system protein A OS=Pseudomonas aeruginosa (strain ATCC 15692 / DSM 22644 / CIP 104116 / JCM 14847 / LMG 12228 / 1C / PRS 101 / PAO1) OX=208964 GN=uvrA PE=3 SV=1	FALSE	FALSE	TRUE	4.65608	4	4	1	1.49411e+07	3.63
High	Q9HVW9	Histidinol dehydrogenase OS=Pseudomonas aeruginosa (strain ATCC 15692 / DSM 22644 / CIP 104116 / JCM 14847 / LMG 12228 / 1C / PRS 101 / PAO1) OX=208964 GN=hisD PE=3 SV=1	FALSE	FALSE	TRUE	9.09091	2	2	2	1.47737e+07	4.37
High	Q9I3J3	Probable transcriptional regulator OS=Pseudomonas aeruginosa (strain ATCC 15692 / DSM 22644 / CIP 104116 / JCM 14847 / LMG 12228 / 1C / PRS 101 / PAO1) OX=208964 GN=PA1520 PE=4 SV=1	FALSE	FALSE	TRUE	20.4633	4	4	4	1.2075e+07	6.57
High	Q9HZJ2	Fatty acid oxidation complex subunit alpha OS=Pseudomonas aeruginosa (strain ATCC 15692 / DSM 22644 / CIP 104116 / JCM 14847 / LMG 12228 / 1C / PRS 101 / PAO1) OX=208964 GN=fadB PE=3 SV=1	FALSE	FALSE	TRUE	8.67133	4	4	4	1.25682e+07	4.54
High	Q9I687	Methylenetetrahydrofolate reductase OS=Pseudomonas aeruginosa (strain ATCC 15692 / DSM 22644 / CIP 104116 / JCM 14847 / LMG 12228 / 1C / PRS 101 / PAO1) OX=208964 GN=metF PE=3 SV=1	FALSE	FALSE	TRUE	16.2069	3	3	3	5.19678e+07	4.62
High	Q9I747	Protein hcp1 OS=Pseudomonas aeruginosa (strain ATCC 15692 / DSM 22644 / CIP 104116 / JCM 14847 / LMG 12228 / 1C / PRS 101 / PAO1) OX=208964 GN=hcp1 PE=1 SV=1	FALSE	FALSE	TRUE	24.0741	3	4	3	4.96907e+06	8.19
High	Q9I3G5	Cbb3-type cytochrome c oxidase subunit OS=Pseudomonas aeruginosa (strain ATCC 15692 / DSM 22644 / CIP 104116 / JCM 14847 / LMG 12228 / 1C / PRS 101 / PAO1) OX=208964 GN=ccoP1 PE=3 SV=1	FALSE	FALSE	TRUE	14.7799	3	4	3	9.06567e+07	4.41
High	Q9HVW0	Arabinose 5-phosphate isomerase KdsD OS=Pseudomonas aeruginosa (strain ATCC 15692 / DSM 22644 / CIP 104116 / JCM 14847 / LMG 12228 / 1C / PRS 101 / PAO1) OX=208964 GN=kdsD PE=1 SV=1	FALSE	FALSE	TRUE	5.52147	1	2	1	1.5098e+08	1.89
High	Q9HXZ5	Enolase OS=Pseudomonas aeruginosa (strain ATCC 15692 / DSM 22644 / CIP 104116 / JCM 14847 / LMG 12228 / 1C / PRS 101 / PAO1) OX=208964 GN=eno PE=3 SV=1	FALSE	FALSE	TRUE	14.6853	4	5	3	2.21631e+07	5.28
High	Q51342	Amidophosphoribosyltransferase OS=Pseudomonas aeruginosa (strain ATCC 15692 / DSM 22644 / CIP 104116 / JCM 14847 / LMG 12228 / 1C / PRS 101 / PAO1) OX=208964 GN=purF PE=3 SV=3	FALSE	FALSE	TRUE	7.78443	3	3	3	2.71736e+07	0
High	Q9HVZ5	Ribosomal RNA small subunit methyltransferase H OS=Pseudomonas aeruginosa (strain ATCC 15692 / DSM 22644 / CIP 104116 / JCM 14847 / LMG 12228 / 1C / PRS 101 / PAO1) OX=208964 GN=rsmH PE=3 SV=1	FALSE	FALSE	TRUE	14.377	3	3	3	66513039	5.95
High	Q9I6H5	2-oxoglutarate reductase OS=Pseudomonas aeruginosa (strain ATCC 15692 / DSM 22644 / CIP 104116 / JCM 14847 / LMG 12228 / 1C / PRS 101 / PAO1) OX=208964 GN=serA PE=3 SV=1	FALSE	FALSE	TRUE	8.80196	4	5	4	3.24317e+07	4.24
High	P53641	Superoxide dismutase [Fe] OS=Pseudomonas aeruginosa (strain ATCC 15692 / DSM 22644 / CIP 104116 / JCM 14847 / LMG 12228 / 1C / PRS 101 / PAO1) OX=208964 GN=sodB PE=3 SV=3	FALSE	FALSE	TRUE	27.9793	4	4	4	6.04485e+08	4.32
High	Q9I1M2	2-oxoisovalerate dehydrogenase subunit alpha OS=Pseudomonas aeruginosa (strain ATCC 15692 / DSM 22644 / CIP 104116 / JCM 14847 / LMG 12228 / 1C / PRS 101 / PAO1) OX=208964 GN=bkdA1 PE=3 SV=1	FALSE	FALSE	TRUE	11.7073	3	3	3	4.74302e+07	4
High	Q9HXV4	Adenylate kinase OS=Pseudomonas aeruginosa (strain ATCC 15692 / DSM 22644 / CIP 104116 / JCM 14847 / LMG 12228 / 1C / PRS 101 / PAO1) OX=208964 GN=adk PE=3 SV=1	FALSE	FALSE	TRUE	12.093	2	3	2	2.61954e+07	2.27
High	Q9HYT6	RNA polymerase-associated protein RapA OS=Pseudomonas aeruginosa (strain ATCC 15692 / DSM 22644 / CIP 104116 / JCM 14847 / LMG 12228 / 1C / PRS 101 / PAO1) OX=208964 GN=rapA PE=3 SV=1	FALSE	FALSE	TRUE	3.36842	2	2	1	2.98692e+07	0
High	P33641	Outer membrane protein assembly factor BamD OS=Pseudomonas aeruginosa (strain ATCC 15692 / DSM 22644 / CIP 104116 / JCM 14847 / LMG 12228 / 1C / PRS 101 / PAO1) OX=208964 GN=bamD PE=3 SV=2	FALSE	FALSE	TRUE	12.9032	2	3	2	8.63194e+06	2.87
High	Q9HTN2	Acetylglutamate kinase OS=Pseudomonas aeruginosa (strain ATCC 15692 / DSM 22644 / CIP 104116 / JCM 14847 / LMG 12228 / 1C / PRS 101 / PAO1) OX=208964 GN=argB PE=1 SV=3	FALSE	FALSE	TRUE	12.9568	3	3	3	2.46685e+07	3.75
High	Q9HUK2	ABC_trans_aux domain-containing protein OS=Pseudomonas aeruginosa (strain ATCC 15692 / DSM 22644 / CIP 104116 / JCM 14847 / LMG 12228 / 1C / PRS 101 / PAO1) OX=208964 GN=PA4963 PE=4 SV=1	FALSE	FALSE	TRUE	14.8305	2	2	2	1.64904e+06	1.93
High	Q51481	Denitrification regulatory protein NirQ OS=Pseudomonas aeruginosa (strain ATCC 15692 / DSM 22644 / CIP 104116 / JCM 14847 / LMG 12228 / 1C / PRS 101 / PAO1) OX=208964 GN=nirQ PE=2 SV=1	FALSE	FALSE	TRUE	5.38462	1	2	1	1.08903e+07	4.34
High	Q9HZP7	Electron transfer flavoprotein subunit alpha OS=Pseudomonas aeruginosa (strain ATCC 15692 / DSM 22644 / CIP 104116 / JCM 14847 / LMG 12228 / 1C / PRS 101 / PAO1) OX=208964 GN=etfA PE=3 SV=1	FALSE	FALSE	TRUE	26.5372	4	4	4	3.32049e+08	5.9
High	Q9HUK8	Phosphatidylserine decarboxylase proenzyme OS=Pseudomonas aeruginosa (strain ATCC 15692 / DSM 22644 / CIP 104116 / JCM 14847 / LMG 12228 / 1C / PRS 101 / PAO1) OX=208964 GN=psd PE=3 SV=1	FALSE	FALSE	TRUE	18.3391	3	3	3	2.38412e+07	0
High	Q9HYR9	ATP-dependent Clp protease proteolytic subunit 2 OS=Pseudomonas aeruginosa (strain ATCC 15692 / DSM 22644 / CIP 104116 / JCM 14847 / LMG 12228 / 1C / PRS 101 / PAO1) OX=208964 GN=clpP2 PE=3 SV=1	FALSE	FALSE	TRUE	15.9204	2	3	2	1.54706e+08	6.36
High	P00106	Cytochrome c4 OS=Pseudomonas aeruginosa (strain ATCC 15692 / DSM 22644 / CIP 104116 / JCM 14847 / LMG 12228 / 1C / PRS 101 / PAO1) OX=208964 GN=cc4 PE=1 SV=3	FALSE	FALSE	TRUE	28.3582	4	4	4	5.48865e+07	4.48
High	Q9I4K8	Probable oxidoreductase OS=Pseudomonas aeruginosa (strain ATCC 15692 / DSM 22644 / CIP 104116 / JCM 14847 / LMG 12228 / 1C / PRS 101 / PAO1) OX=208964 GN=PA1127 PE=4 SV=1	FALSE	FALSE	TRUE	14.2857	3	3	3	1.75316e+07	4.73
High	Q9HXJ6	TPR_21 domain-containing protein OS=Pseudomonas aeruginosa (strain ATCC 15692 / DSM 22644 / CIP 104116 / JCM 14847 / LMG 12228 / 1C / PRS 101 / PAO1) OX=208964 GN=PA3801 PE=3 SV=1	FALSE	FALSE	TRUE	14.9533	2	2	2	4.61901e+07	3.42
High	Q9HZN4	50S ribosomal protein L32 OS=Pseudomonas aeruginosa (strain ATCC 15692 / DSM 22644 / CIP 104116 / JCM 14847 / LMG 12228 / 1C / PRS 101 / PAO1) OX=208964 GN=rpmF PE=1 SV=3	FALSE	FALSE	TRUE	25	2	2	2	648894	5.52
High	Q9HVE7	Probable purine/pyrimidine phosphoribosyl transferase OS=Pseudomonas aeruginosa (strain ATCC 15692 / DSM 22644 / CIP 104116 / JCM 14847 / LMG 12228 / 1C / PRS 101 / PAO1) OX=208964 GN=PA4645 PE=4 SV=1	FALSE	FALSE	TRUE	24.3243	3	3	3	7.88188e+06	4.06
High	Q9HU22	Glucose-1-phosphate thymidylyltransferase OS=Pseudomonas aeruginosa (strain ATCC 15692 / DSM 22644 / CIP 104116 / JCM 14847 / LMG 12228 / 1C / PRS 101 / PAO1) OX=208964 GN=rmlA PE=1 SV=1	FALSE	FALSE	TRUE	12.9693	4	5	2	1.1063e+07	7.69
High	Q9HWX4	3,4-dihydroxy-2-butanone 4-phosphate synthase OS=Pseudomonas aeruginosa (strain ATCC 15692 / DSM 22644 / CIP 104116 / JCM 14847 / LMG 12228 / 1C / PRS 101 / PAO1) OX=208964 GN=ribB PE=3 SV=1	FALSE	FALSE	TRUE	7.39726	2	2	2	2.73488e+06	3.97
High	Q9I0B0	Type I site-specific deoxyribonuclease OS=Pseudomonas aeruginosa (strain ATCC 15692 / DSM 22644 / CIP 104116 / JCM 14847 / LMG 12228 / 1C / PRS 101 / PAO1) OX=208964 GN=PA2732 PE=3 SV=1	FALSE	FALSE	TRUE	2.09424	2	2	2	10425034	4.37
High	Q9I0T2	Probable acyl-CoA dehydrogenase OS=Pseudomonas aeruginosa (strain ATCC 15692 / DSM 22644 / CIP 104116 / JCM 14847 / LMG 12228 / 1C / PRS 101 / PAO1) OX=208964 GN=PA2552 PE=3 SV=1	FALSE	FALSE	TRUE	8.26667	2	2	2	1.26335e+07	5.02
High	Q9I0D3	Cysteine synthase OS=Pseudomonas aeruginosa (strain ATCC 15692 / DSM 22644 / CIP 104116 / JCM 14847 / LMG 12228 / 1C / PRS 101 / PAO1) OX=208964 GN=cysK PE=3 SV=1	FALSE	FALSE	TRUE	17.284	3	3	3	5.19918e+07	4.06
High	Q9HU41	Imidazoleglycerol-phosphate dehydratase OS=Pseudomonas aeruginosa (strain ATCC 15692 / DSM 22644 / CIP 104116 / JCM 14847 / LMG 12228 / 1C / PRS 101 / PAO1) OX=208964 GN=hisB PE=3 SV=1	FALSE	FALSE	TRUE	13.7056	2	2	2	1.18214e+07	4.47
High	Q9I0T0	Probable short-chain dehydrogenase OS=Pseudomonas aeruginosa (strain ATCC 15692 / DSM 22644 / CIP 104116 / JCM 14847 / LMG 12228 / 1C / PRS 101 / PAO1) OX=208964 GN=PA2554 PE=3 SV=1	FALSE	FALSE	TRUE	21.9608	3	3	3	6.4588e+07	6.21
High	Q9I407	Glutaminase-asparaginase OS=Pseudomonas aeruginosa (strain ATCC 15692 / DSM 22644 / CIP 104116 / JCM 14847 / LMG 12228 / 1C / PRS 101 / PAO1) OX=208964 GN=ansB PE=1 SV=1	FALSE	FALSE	TRUE	16.0221	4	4	4	3.27507e+07	6.6
High	Q9HY01	S-(hydroxymethyl)glutathione dehydrogenase OS=Pseudomonas aeruginosa (strain ATCC 15692 / DSM 22644 / CIP 104116 / JCM 14847 / LMG 12228 / 1C / PRS 101 / PAO1) OX=208964 GN=adhC PE=3 SV=1	FALSE	FALSE	TRUE	11.8919	2	2	2	9.3147e+07	5.05
High	Q9HYI8	Pyruvate dehydrogenase E1 component subunit alpha OS=Pseudomonas aeruginosa (strain ATCC 15692 / DSM 22644 / CIP 104116 / JCM 14847 / LMG 12228 / 1C / PRS 101 / PAO1) OX=208964 GN=pdhA PE=4 SV=1	FALSE	FALSE	TRUE	12.8767	3	3	3	1.26194e+06	4.91
High	Q9HZ48	Probable binding protein component of ABC sugar transporter OS=Pseudomonas aeruginosa (strain ATCC 15692 / DSM 22644 / CIP 104116 / JCM 14847 / LMG 12228 / 1C / PRS 101 / PAO1) OX=208964 GN=PA3190 PE=4 SV=1	FALSE	FALSE	TRUE	14.5238	3	3	3	3.42465e+07	4.39
High	Q9HTX5	Aminomethyltransferase OS=Pseudomonas aeruginosa (strain ATCC 15692 / DSM 22644 / CIP 104116 / JCM 14847 / LMG 12228 / 1C / PRS 101 / PAO1) OX=208964 GN=gcvT PE=3 SV=1	FALSE	FALSE	TRUE	9.16667	2	2	2	1.23259e+07	1.92
High	Q9HW72	Pyruvate kinase OS=Pseudomonas aeruginosa (strain ATCC 15692 / DSM 22644 / CIP 104116 / JCM 14847 / LMG 12228 / 1C / PRS 101 / PAO1) OX=208964 GN=pykA PE=1 SV=1	FALSE	FALSE	TRUE	12.0083	4	4	4	6.9545e+07	4.13
High	Q9HW02	UDP-N-acetylmuramate--L-alanine ligase OS=Pseudomonas aeruginosa (strain ATCC 15692 / DSM 22644 / CIP 104116 / JCM 14847 / LMG 12228 / 1C / PRS 101 / PAO1) OX=208964 GN=murC PE=1 SV=1	FALSE	FALSE	TRUE	9.16667	4	4	4	1.66077e+07	5.26
High	P50987	Argininosuccinate lyase OS=Pseudomonas aeruginosa (strain ATCC 15692 / DSM 22644 / CIP 104116 / JCM 14847 / LMG 12228 / 1C / PRS 101 / PAO1) OX=208964 GN=argH PE=3 SV=2	FALSE	FALSE	TRUE	6.89655	2	2	2	4.01921e+07	4.5
High	Q9HZX9	Probable chemotaxis transducer OS=Pseudomonas aeruginosa (strain ATCC 15692 / DSM 22644 / CIP 104116 / JCM 14847 / LMG 12228 / 1C / PRS 101 / PAO1) OX=208964 GN=PA2867 PE=4 SV=1	FALSE	FALSE	TRUE	6.32653	2	2	1	4.10677e+07	5.33
High	P37799	Biotin carboxyl carrier protein of acetyl-CoA carboxylase OS=Pseudomonas aeruginosa (strain ATCC 15692 / DSM 22644 / CIP 104116 / JCM 14847 / LMG 12228 / 1C / PRS 101 / PAO1) OX=208964 GN=accB PE=3 SV=1	FALSE	FALSE	TRUE	42.9487	3	3	2	1.51981e+08	3.81
High	Q9HTM1	DNA-directed RNA polymerase subunit omega OS=Pseudomonas aeruginosa (strain ATCC 15692 / DSM 22644 / CIP 104116 / JCM 14847 / LMG 12228 / 1C / PRS 101 / PAO1) OX=208964 GN=rpoZ PE=3 SV=1	FALSE	FALSE	TRUE	42.0455	2	2	2	3.58466e+07	0
High	Q9I3F6	Aerotaxis receptor Aer OS=Pseudomonas aeruginosa (strain ATCC 15692 / DSM 22644 / CIP 104116 / JCM 14847 / LMG 12228 / 1C / PRS 101 / PAO1) OX=208964 GN=aer PE=4 SV=1	FALSE	FALSE	TRUE	6.33397	3	3	2	3.75258e+07	5.64
High	Q9HYD5	NAD-dependent malic enzyme OS=Pseudomonas aeruginosa (strain ATCC 15692 / DSM 22644 / CIP 104116 / JCM 14847 / LMG 12228 / 1C / PRS 101 / PAO1) OX=208964 GN=maeA PE=3 SV=1	FALSE	FALSE	TRUE	7.97872	3	3	2	3.36868e+06	4.79
High	Q9I4W3	4-hydroxy-tetrahydrodipicolinate synthase OS=Pseudomonas aeruginosa (strain ATCC 15692 / DSM 22644 / CIP 104116 / JCM 14847 / LMG 12228 / 1C / PRS 101 / PAO1) OX=208964 GN=dapA PE=1 SV=1	FALSE	FALSE	TRUE	8.90411	2	3	2	6.26065e+06	2.44
High	O87125	Protein-glutamate methylesterase/protein-glutamine glutaminase 1 OS=Pseudomonas aeruginosa (strain ATCC 15692 / DSM 22644 / CIP 104116 / JCM 14847 / LMG 12228 / 1C / PRS 101 / PAO1) OX=208964 GN=cheB1 PE=1 SV=2	FALSE	FALSE	TRUE	8.69565	2	2	2	2.01388e+07	4.26
High	Q9I3X2	DNA helicase OS=Pseudomonas aeruginosa (strain ATCC 15692 / DSM 22644 / CIP 104116 / JCM 14847 / LMG 12228 / 1C / PRS 101 / PAO1) OX=208964 GN=PA1372 PE=4 SV=1	FALSE	FALSE	TRUE	5.90717	3	3	3	2.19739e+06	3.54
High	Q9X2T1	Thioredoxin OS=Pseudomonas aeruginosa (strain ATCC 15692 / DSM 22644 / CIP 104116 / JCM 14847 / LMG 12228 / 1C / PRS 101 / PAO1) OX=208964 GN=trxA PE=3 SV=1	FALSE	FALSE	TRUE	19.4444	2	4	2	5.90854e+07	4.48
High	Q9HTF1	Low specificity L-threonine aldolase OS=Pseudomonas aeruginosa (strain ATCC 15692 / DSM 22644 / CIP 104116 / JCM 14847 / LMG 12228 / 1C / PRS 101 / PAO1) OX=208964 GN=ltaE PE=3 SV=1	FALSE	FALSE	TRUE	11.5607	3	3	3	3.30015e+07	3.59
High	Q9HZU7	Probable outer membrane protein OS=Pseudomonas aeruginosa (strain ATCC 15692 / DSM 22644 / CIP 104116 / JCM 14847 / LMG 12228 / 1C / PRS 101 / PAO1) OX=208964 GN=PA2900 PE=3 SV=1	FALSE	FALSE	TRUE	15.2416	3	3	3	1.98237e+06	4.64
High	O82852	Uridylate kinase OS=Pseudomonas aeruginosa (strain ATCC 15692 / DSM 22644 / CIP 104116 / JCM 14847 / LMG 12228 / 1C / PRS 101 / PAO1) OX=208964 GN=pyrH PE=3 SV=2	FALSE	FALSE	TRUE	12.2449	3	4	3	4.40312e+07	0
High	Q9I6J5	Probable glutamine synthetase OS=Pseudomonas aeruginosa (strain ATCC 15692 / DSM 22644 / CIP 104116 / JCM 14847 / LMG 12228 / 1C / PRS 101 / PAO1) OX=208964 GN=spuI PE=3 SV=1	FALSE	FALSE	TRUE	13.1004	3	3	3	3.87581e+07	6.26
High	Q9I2W7	Putative 4-hydroxy-4-methyl-2-oxoglutarate aldolase OS=Pseudomonas aeruginosa (strain ATCC 15692 / DSM 22644 / CIP 104116 / JCM 14847 / LMG 12228 / 1C / PRS 101 / PAO1) OX=208964 GN=PA1772 PE=1 SV=1	FALSE	FALSE	TRUE	13.5802	3	5	3	3.20831e+07	6.34
High	Q9HYU4	Long-chain-fatty-acid--CoA ligase OS=Pseudomonas aeruginosa (strain ATCC 15692 / DSM 22644 / CIP 104116 / JCM 14847 / LMG 12228 / 1C / PRS 101 / PAO1) OX=208964 GN=fadD1 PE=4 SV=1	FALSE	FALSE	TRUE	6.76157	3	3	3	1.94366e+07	3.96
High	Q14T72	Formate dehydrogenase-O, major subunit OS=Pseudomonas aeruginosa (strain ATCC 15692 / DSM 22644 / CIP 104116 / JCM 14847 / LMG 12228 / 1C / PRS 101 / PAO1) OX=208964 GN=fdnG PE=4 SV=2	FALSE	FALSE	TRUE	2.63158	2	2	2	7.58434e+06	4.41
High	Q9HVM8	Type IV pilus biogenesis factor PilY1 OS=Pseudomonas aeruginosa (strain ATCC 15692 / DSM 22644 / CIP 104116 / JCM 14847 / LMG 12228 / 1C / PRS 101 / PAO1) OX=208964 GN=pilY1 PE=3 SV=1	FALSE	FALSE	TRUE	3.35917	2	2	2	8.94949e+06	0
High	P95459	Major cold shock protein CspA OS=Pseudomonas aeruginosa (strain ATCC 15692 / DSM 22644 / CIP 104116 / JCM 14847 / LMG 12228 / 1C / PRS 101 / PAO1) OX=208964 GN=cspA PE=2 SV=1	FALSE	FALSE	TRUE	40.5797	2	2	2	9.40667e+07	3.62
High	Q9I6B4	Thiazole synthase OS=Pseudomonas aeruginosa (strain ATCC 15692 / DSM 22644 / CIP 104116 / JCM 14847 / LMG 12228 / 1C / PRS 101 / PAO1) OX=208964 GN=thiG PE=1 SV=1	FALSE	FALSE	TRUE	10.9434	2	2	2	1.54316e+07	3.63
High	P43336	Aromatic-amino-acid aminotransferase OS=Pseudomonas aeruginosa (strain ATCC 15692 / DSM 22644 / CIP 104116 / JCM 14847 / LMG 12228 / 1C / PRS 101 / PAO1) OX=208964 GN=phhC PE=3 SV=2	FALSE	FALSE	TRUE	7.01754	2	2	2	5.19002e+07	2.15
High	Q9HZN3	23S rRNA accumulation protein YceD OS=Pseudomonas aeruginosa (strain ATCC 15692 / DSM 22644 / CIP 104116 / JCM 14847 / LMG 12228 / 1C / PRS 101 / PAO1) OX=208964 GN=PA2971 PE=3 SV=1	FALSE	FALSE	TRUE	15.7303	2	2	2	9.22459e+06	5.33
High	Q9HVA1	Acetolactate synthase OS=Pseudomonas aeruginosa (strain ATCC 15692 / DSM 22644 / CIP 104116 / JCM 14847 / LMG 12228 / 1C / PRS 101 / PAO1) OX=208964 GN=ilvH PE=3 SV=1	FALSE	FALSE	TRUE	19.0184	2	2	2	4.91284e+06	2.93
High	Q9HX41	Phosphomethylpyrimidine kinase OS=Pseudomonas aeruginosa (strain ATCC 15692 / DSM 22644 / CIP 104116 / JCM 14847 / LMG 12228 / 1C / PRS 101 / PAO1) OX=208964 GN=thiD PE=4 SV=1	FALSE	FALSE	TRUE	10.566	2	2	2	7.03532e+06	1.85
High	Q9HTV8	Biotin_lipoyl_2 domain-containing protein OS=Pseudomonas aeruginosa (strain ATCC 15692 / DSM 22644 / CIP 104116 / JCM 14847 / LMG 12228 / 1C / PRS 101 / PAO1) OX=208964 GN=PA5232 PE=4 SV=1	FALSE	FALSE	TRUE	7.0028	2	2	2	1.52456e+07	2.18
High	Q9LCT6	D-alanine--D-alanine ligase B OS=Pseudomonas aeruginosa (strain ATCC 15692 / DSM 22644 / CIP 104116 / JCM 14847 / LMG 12228 / 1C / PRS 101 / PAO1) OX=208964 GN=ddlB PE=3 SV=1	FALSE	FALSE	TRUE	7.83699	2	2	2	2.70127e+07	2.97
High	Q9HYU8	Probable HIT family protein OS=Pseudomonas aeruginosa (strain ATCC 15692 / DSM 22644 / CIP 104116 / JCM 14847 / LMG 12228 / 1C / PRS 101 / PAO1) OX=208964 GN=PA3295 PE=4 SV=1	FALSE	FALSE	TRUE	17.2414	2	2	2	7.00251e+07	2.09
High	Q9I384	Uncharacterized protein OS=Pseudomonas aeruginosa (strain ATCC 15692 / DSM 22644 / CIP 104116 / JCM 14847 / LMG 12228 / 1C / PRS 101 / PAO1) OX=208964 GN=PA1641 PE=4 SV=1	FALSE	FALSE	TRUE	28.2609	2	2	2	4.33871e+06	3.43
High	Q9HY12	Uncharacterized protein OS=Pseudomonas aeruginosa (strain ATCC 15692 / DSM 22644 / CIP 104116 / JCM 14847 / LMG 12228 / 1C / PRS 101 / PAO1) OX=208964 GN=PA3614 PE=4 SV=1	FALSE	FALSE	TRUE	6.42398	2	3	2	8.29025e+06	1.7
High	Q9HUV9	Bifunctional purine biosynthesis protein PurH OS=Pseudomonas aeruginosa (strain ATCC 15692 / DSM 22644 / CIP 104116 / JCM 14847 / LMG 12228 / 1C / PRS 101 / PAO1) OX=208964 GN=purH PE=3 SV=1	FALSE	FALSE	TRUE	6.72897	3	3	3	9.90284e+06	3.53
High	O82853	Ribosome-recycling factor OS=Pseudomonas aeruginosa (strain ATCC 15692 / DSM 22644 / CIP 104116 / JCM 14847 / LMG 12228 / 1C / PRS 101 / PAO1) OX=208964 GN=frr PE=3 SV=1	FALSE	FALSE	TRUE	10.8108	2	2	2	62967076	3.98
High	P43335	Pterin-4-alpha-carbinolamine dehydratase OS=Pseudomonas aeruginosa (strain ATCC 15692 / DSM 22644 / CIP 104116 / JCM 14847 / LMG 12228 / 1C / PRS 101 / PAO1) OX=208964 GN=phhB PE=3 SV=1	FALSE	FALSE	TRUE	22.0339	2	3	2	1.03169e+08	6.45
High	Q9HUC8	Arginine--tRNA ligase OS=Pseudomonas aeruginosa (strain ATCC 15692 / DSM 22644 / CIP 104116 / JCM 14847 / LMG 12228 / 1C / PRS 101 / PAO1) OX=208964 GN=argS PE=3 SV=1	FALSE	FALSE	TRUE	6.13288	3	3	3	1.45732e+07	0
High	Q9I612	Probable acyl-CoA dehydrogenase OS=Pseudomonas aeruginosa (strain ATCC 15692 / DSM 22644 / CIP 104116 / JCM 14847 / LMG 12228 / 1C / PRS 101 / PAO1) OX=208964 GN=PA0506 PE=3 SV=1	FALSE	FALSE	TRUE	5.32446	2	2	2	2.16321e+07	5.33
High	G3XD52	MaoC-like domain-containing protein OS=Pseudomonas aeruginosa (strain ATCC 15692 / DSM 22644 / CIP 104116 / JCM 14847 / LMG 12228 / 1C / PRS 101 / PAO1) OX=208964 GN=PA3302 PE=4 SV=1	FALSE	FALSE	TRUE	16.0256	2	2	2	2.98036e+06	2.46
High	Q9I5Y3	Uncharacterized protein OS=Pseudomonas aeruginosa (strain ATCC 15692 / DSM 22644 / CIP 104116 / JCM 14847 / LMG 12228 / 1C / PRS 101 / PAO1) OX=208964 GN=PA0553 PE=4 SV=1	FALSE	FALSE	TRUE	31.8182	1	1	1	1.57987e+06	3.59
High	Q9HY11	AMP nucleosidase OS=Pseudomonas aeruginosa (strain ATCC 15692 / DSM 22644 / CIP 104116 / JCM 14847 / LMG 12228 / 1C / PRS 101 / PAO1) OX=208964 GN=PA3615 PE=4 SV=1	FALSE	FALSE	TRUE	7.58427	2	2	2	1.79692e+07	3.65
High	Q9HZP5	Electron transfer flavoprotein-ubiquinone oxidoreductase OS=Pseudomonas aeruginosa (strain ATCC 15692 / DSM 22644 / CIP 104116 / JCM 14847 / LMG 12228 / 1C / PRS 101 / PAO1) OX=208964 GN=PA2953 PE=1 SV=1	FALSE	FALSE	TRUE	8.89292	3	3	3	7.21833e+06	1.94
High	Q9HY07	Ferredoxin 1 OS=Pseudomonas aeruginosa (strain ATCC 15692 / DSM 22644 / CIP 104116 / JCM 14847 / LMG 12228 / 1C / PRS 101 / PAO1) OX=208964 GN=fdxA PE=3 SV=1	FALSE	FALSE	TRUE	14.9533	2	2	2	6.29132e+06	4.83
High	Q9HT25	Glutamine--fructose-6-phosphate aminotransferase [isomerizing] OS=Pseudomonas aeruginosa (strain ATCC 15692 / DSM 22644 / CIP 104116 / JCM 14847 / LMG 12228 / 1C / PRS 101 / PAO1) OX=208964 GN=glmS PE=3 SV=3	FALSE	FALSE	TRUE	2.94599	1	1	1	1158635	2.57
High	Q9I513	Phosphoribosylformylglycinamidine cyclo-ligase OS=Pseudomonas aeruginosa (strain ATCC 15692 / DSM 22644 / CIP 104116 / JCM 14847 / LMG 12228 / 1C / PRS 101 / PAO1) OX=208964 GN=purM PE=3 SV=1	FALSE	FALSE	TRUE	18.4136	4	5	4	9.49535e+07	2.04
High	Q03456	Ferric uptake regulation protein OS=Pseudomonas aeruginosa (strain ATCC 15692 / DSM 22644 / CIP 104116 / JCM 14847 / LMG 12228 / 1C / PRS 101 / PAO1) OX=208964 GN=fur PE=1 SV=1	FALSE	FALSE	TRUE	17.9104	2	2	2	8.55383e+07	4.04
High	Q9HYF4	Probable malate:quinone oxidoreductase 1 OS=Pseudomonas aeruginosa (strain ATCC 15692 / DSM 22644 / CIP 104116 / JCM 14847 / LMG 12228 / 1C / PRS 101 / PAO1) OX=208964 GN=mqo1 PE=3 SV=1	FALSE	FALSE	TRUE	2.48566	2	2	2	1.27235e+06	4.14
High	Q9I6J3	Probable glutamine synthetase OS=Pseudomonas aeruginosa (strain ATCC 15692 / DSM 22644 / CIP 104116 / JCM 14847 / LMG 12228 / 1C / PRS 101 / PAO1) OX=208964 GN=spuB PE=3 SV=1	FALSE	FALSE	TRUE	6.63717	2	2	2	4.54291e+06	0
High	Q9I297	Methylcrotonyl-CoA carboxylase, beta-subunit OS=Pseudomonas aeruginosa (strain ATCC 15692 / DSM 22644 / CIP 104116 / JCM 14847 / LMG 12228 / 1C / PRS 101 / PAO1) OX=208964 GN=liuB PE=1 SV=1	FALSE	FALSE	TRUE	11.4019	3	3	3	1.85939e+06	3.17
High	Q9I0H4	Flavohemoprotein OS=Pseudomonas aeruginosa (strain ATCC 15692 / DSM 22644 / CIP 104116 / JCM 14847 / LMG 12228 / 1C / PRS 101 / PAO1) OX=208964 GN=hmp PE=3 SV=1	FALSE	FALSE	TRUE	6.87023	2	2	2	5.38961e+06	3.99
High	Q9HWW7	Probable thioredoxin OS=Pseudomonas aeruginosa (strain ATCC 15692 / DSM 22644 / CIP 104116 / JCM 14847 / LMG 12228 / 1C / PRS 101 / PAO1) OX=208964 GN=PA4061 PE=3 SV=1	FALSE	FALSE	TRUE	13.4948	2	2	2	26742217	4.34
High	Q9HVX6	Tryptophan--tRNA ligase OS=Pseudomonas aeruginosa (strain ATCC 15692 / DSM 22644 / CIP 104116 / JCM 14847 / LMG 12228 / 1C / PRS 101 / PAO1) OX=208964 GN=trpS PE=3 SV=1	FALSE	FALSE	TRUE	14.2857	4	4	4	1.21994e+08	0
High	G3XD39	Probable bacteriophage protein OS=Pseudomonas aeruginosa (strain ATCC 15692 / DSM 22644 / CIP 104116 / JCM 14847 / LMG 12228 / 1C / PRS 101 / PAO1) OX=208964 GN=PA0622 PE=1 SV=1	FALSE	FALSE	TRUE	11.1399	2	2	2		4.69
High	Q51472	Integration host factor subunit alpha OS=Pseudomonas aeruginosa (strain ATCC 15692 / DSM 22644 / CIP 104116 / JCM 14847 / LMG 12228 / 1C / PRS 101 / PAO1) OX=208964 GN=ihfA PE=1 SV=3	FALSE	FALSE	TRUE	20	2	2	1	3.04261e+06	4.45
High	Q9I7B8	Glycine--tRNA ligase beta subunit OS=Pseudomonas aeruginosa (strain ATCC 15692 / DSM 22644 / CIP 104116 / JCM 14847 / LMG 12228 / 1C / PRS 101 / PAO1) OX=208964 GN=glyS PE=3 SV=1	FALSE	FALSE	TRUE	5.26316	2	2	2	36029576	1.9
High	Q9HTR6	Nitrogen regulatory protein P-II 2 OS=Pseudomonas aeruginosa (strain ATCC 15692 / DSM 22644 / CIP 104116 / JCM 14847 / LMG 12228 / 1C / PRS 101 / PAO1) OX=208964 GN=glnK PE=3 SV=1	FALSE	FALSE	TRUE	27.6786	2	3	2	8.49679e+07	1.68
High	Q9HU56	Protein-export protein SecB OS=Pseudomonas aeruginosa (strain ATCC 15692 / DSM 22644 / CIP 104116 / JCM 14847 / LMG 12228 / 1C / PRS 101 / PAO1) OX=208964 GN=secB PE=3 SV=1	FALSE	FALSE	TRUE	14.1104	2	2	2	3.77364e+07	4.02
High	Q9I662	Probable cold-shock protein OS=Pseudomonas aeruginosa (strain ATCC 15692 / DSM 22644 / CIP 104116 / JCM 14847 / LMG 12228 / 1C / PRS 101 / PAO1) OX=208964 GN=PA0456 PE=4 SV=1	FALSE	FALSE	TRUE	26.087	1	1	1	6.72327e+08	2.87
High	Q9HT45	Tim44 domain-containing protein OS=Pseudomonas aeruginosa (strain ATCC 15692 / DSM 22644 / CIP 104116 / JCM 14847 / LMG 12228 / 1C / PRS 101 / PAO1) OX=208964 GN=PA5528 PE=4 SV=1	FALSE	FALSE	TRUE	10.2113	1	1	1	9.16345e+06	2.7
High	Q9I2R7	Probable short-chain dehydrogenase OS=Pseudomonas aeruginosa (strain ATCC 15692 / DSM 22644 / CIP 104116 / JCM 14847 / LMG 12228 / 1C / PRS 101 / PAO1) OX=208964 GN=PA1828 PE=4 SV=1	FALSE	FALSE	TRUE	7.05882	1	1	1	3.51309e+07	2.68
High	Q51564	Diaminopimelate epimerase OS=Pseudomonas aeruginosa (strain ATCC 15692 / DSM 22644 / CIP 104116 / JCM 14847 / LMG 12228 / 1C / PRS 101 / PAO1) OX=208964 GN=dapF PE=3 SV=2	FALSE	FALSE	TRUE	7.6087	1	1	1	1.1803e+07	2.35
High	Q9HWX6	Transcription antitermination protein NusB OS=Pseudomonas aeruginosa (strain ATCC 15692 / DSM 22644 / CIP 104116 / JCM 14847 / LMG 12228 / 1C / PRS 101 / PAO1) OX=208964 GN=nusB PE=3 SV=1	FALSE	FALSE	TRUE	13.8365	1	1	1	5.99242e+07	2.91
High	Q9I6G2	UPF0339 protein PA0329 OS=Pseudomonas aeruginosa (strain ATCC 15692 / DSM 22644 / CIP 104116 / JCM 14847 / LMG 12228 / 1C / PRS 101 / PAO1) OX=208964 GN=PA0329 PE=3 SV=1	FALSE	FALSE	TRUE	38.1818	2	2	2	1.10922e+07	2.67
High	Q9HW16	DUF2470 domain-containing protein OS=Pseudomonas aeruginosa (strain ATCC 15692 / DSM 22644 / CIP 104116 / JCM 14847 / LMG 12228 / 1C / PRS 101 / PAO1) OX=208964 GN=PA4388 PE=1 SV=1	FALSE	FALSE	TRUE	10.6557	2	2	2	3.4478e+07	2.95
High	Q9HUG0	Probable carbamoyl transferase OS=Pseudomonas aeruginosa (strain ATCC 15692 / DSM 22644 / CIP 104116 / JCM 14847 / LMG 12228 / 1C / PRS 101 / PAO1) OX=208964 GN=PA5005 PE=3 SV=1	FALSE	FALSE	TRUE	5.47009	2	2	2	17419850	4.28
High	Q9HWD7	50S ribosomal protein L23 OS=Pseudomonas aeruginosa (strain ATCC 15692 / DSM 22644 / CIP 104116 / JCM 14847 / LMG 12228 / 1C / PRS 101 / PAO1) OX=208964 GN=rplW PE=3 SV=1	FALSE	FALSE	TRUE	43.4343	4	5	4	1.22316e+08	2.14
High	Q9I4G3	Periplasmic nitrate reductase OS=Pseudomonas aeruginosa (strain ATCC 15692 / DSM 22644 / CIP 104116 / JCM 14847 / LMG 12228 / 1C / PRS 101 / PAO1) OX=208964 GN=napA PE=3 SV=1	FALSE	FALSE	TRUE	4.34258	3	3	3	2.5054e+07	0
High	Q9HV50	Phosphoglucosamine mutase OS=Pseudomonas aeruginosa (strain ATCC 15692 / DSM 22644 / CIP 104116 / JCM 14847 / LMG 12228 / 1C / PRS 101 / PAO1) OX=208964 GN=glmM PE=3 SV=1	FALSE	FALSE	TRUE	5.61798	2	2	2	2.00215e+07	3.71
High	Q59653	Aspartate carbamoyltransferase OS=Pseudomonas aeruginosa (strain ATCC 15692 / DSM 22644 / CIP 104116 / JCM 14847 / LMG 12228 / 1C / PRS 101 / PAO1) OX=208964 GN=pyrB PE=3 SV=2	FALSE	FALSE	TRUE	6.28743	2	2	2	1.11799e+07	2.56
High	P43334	Phenylalanine-4-hydroxylase OS=Pseudomonas aeruginosa (strain ATCC 15692 / DSM 22644 / CIP 104116 / JCM 14847 / LMG 12228 / 1C / PRS 101 / PAO1) OX=208964 GN=phhA PE=3 SV=2	FALSE	FALSE	TRUE	6.87023	1	2	1	6.14333e+07	2.03
High	Q9I710	Uncharacterized protein OS=Pseudomonas aeruginosa (strain ATCC 15692 / DSM 22644 / CIP 104116 / JCM 14847 / LMG 12228 / 1C / PRS 101 / PAO1) OX=208964 GN=PA0122 PE=3 SV=1	FALSE	FALSE	TRUE	13.9706	1	1	1	7.31057e+06	0
High	Q9I352	Bacteriohemerythrin OS=Pseudomonas aeruginosa (strain ATCC 15692 / DSM 22644 / CIP 104116 / JCM 14847 / LMG 12228 / 1C / PRS 101 / PAO1) OX=208964 GN=PA1673 PE=3 SV=1	FALSE	FALSE	TRUE	11.1111	1	1	1	1.31853e+08	2.37
High	Q9HZJ5	DNA topoisomerase 1 OS=Pseudomonas aeruginosa (strain ATCC 15692 / DSM 22644 / CIP 104116 / JCM 14847 / LMG 12228 / 1C / PRS 101 / PAO1) OX=208964 GN=topA PE=3 SV=1	FALSE	FALSE	TRUE	2.76498	2	2	1	3.38458e+06	2.9
High	Q9I6G1	Ribose-5-phosphate isomerase A OS=Pseudomonas aeruginosa (strain ATCC 15692 / DSM 22644 / CIP 104116 / JCM 14847 / LMG 12228 / 1C / PRS 101 / PAO1) OX=208964 GN=rpiA PE=1 SV=1	FALSE	FALSE	TRUE	16.1435	2	2	2	9.21293e+06	0
High	Q9I0H9	PepSY domain-containing protein OS=Pseudomonas aeruginosa (strain ATCC 15692 / DSM 22644 / CIP 104116 / JCM 14847 / LMG 12228 / 1C / PRS 101 / PAO1) OX=208964 GN=PA2659 PE=4 SV=1	FALSE	FALSE	TRUE	16.6667	1	1	1	2.06646e+06	3.6
High	Q9I522	Lipopolysaccharide biosynthetic protein LpxO2 OS=Pseudomonas aeruginosa (strain ATCC 15692 / DSM 22644 / CIP 104116 / JCM 14847 / LMG 12228 / 1C / PRS 101 / PAO1) OX=208964 GN=lpxO2 PE=4 SV=1	FALSE	FALSE	TRUE	9.29487	2	3	2	4.29658e+07	3.31
High	Q9HVF8	Probable chemotaxis transducer OS=Pseudomonas aeruginosa (strain ATCC 15692 / DSM 22644 / CIP 104116 / JCM 14847 / LMG 12228 / 1C / PRS 101 / PAO1) OX=208964 GN=PA4633 PE=4 SV=1	FALSE	FALSE	TRUE	3.37079	2	2	1		4.73
High	Q9HXP8	Signal recognition particle protein OS=Pseudomonas aeruginosa (strain ATCC 15692 / DSM 22644 / CIP 104116 / JCM 14847 / LMG 12228 / 1C / PRS 101 / PAO1) OX=208964 GN=ffh PE=3 SV=1	FALSE	FALSE	TRUE	4.814	2	2	2	3.46478e+09	2.34
High	Q51487	Outer membrane protein OprM OS=Pseudomonas aeruginosa (strain ATCC 15692 / DSM 22644 / CIP 104116 / JCM 14847 / LMG 12228 / 1C / PRS 101 / PAO1) OX=208964 GN=oprM PE=1 SV=2	FALSE	FALSE	TRUE	8.86598	3	3	3	6.74388e+06	2.11
High	Q9HYT1	PBPb domain-containing protein OS=Pseudomonas aeruginosa (strain ATCC 15692 / DSM 22644 / CIP 104116 / JCM 14847 / LMG 12228 / 1C / PRS 101 / PAO1) OX=208964 GN=PA3313 PE=3 SV=1	FALSE	FALSE	TRUE	9.55224	2	2	2	2.06209e+07	2.37
High	Q9HT68	Probable TonB-dependent receptor OS=Pseudomonas aeruginosa (strain ATCC 15692 / DSM 22644 / CIP 104116 / JCM 14847 / LMG 12228 / 1C / PRS 101 / PAO1) OX=208964 GN=PA5505 PE=1 SV=1	FALSE	FALSE	TRUE	14.6154	2	2	2	6.3101e+06	2.09
High	P0DP44	Polyphosphate kinase OS=Pseudomonas aeruginosa (strain ATCC 15692 / DSM 22644 / CIP 104116 / JCM 14847 / LMG 12228 / 1C / PRS 101 / PAO1) OX=208964 GN=ppk PE=1 SV=1	FALSE	FALSE	TRUE	3.91304	2	2	2		4.34
High	Q9I0A7	Site-specific DNA-methyltransferase (adenine-specific) OS=Pseudomonas aeruginosa (strain ATCC 15692 / DSM 22644 / CIP 104116 / JCM 14847 / LMG 12228 / 1C / PRS 101 / PAO1) OX=208964 GN=PA2735 PE=3 SV=1	FALSE	FALSE	TRUE	2.0202	1	1	1	5.04364e+06	2.19
High	Q9I383	Selenide, water dikinase OS=Pseudomonas aeruginosa (strain ATCC 15692 / DSM 22644 / CIP 104116 / JCM 14847 / LMG 12228 / 1C / PRS 101 / PAO1) OX=208964 GN=selD PE=3 SV=1	FALSE	FALSE	TRUE	10.4651	2	2	2	3.83678e+07	2.17
High	E1JGJ8	Peptide chain release factor 2 OS=Pseudomonas aeruginosa (strain ATCC 15692 / DSM 22644 / CIP 104116 / JCM 14847 / LMG 12228 / 1C / PRS 101 / PAO1) OX=208964 GN=prfB PE=3 SV=1	FALSE	FALSE	TRUE	5.76923	1	1	1	9.60946e+07	2.95
High	Q9HXI0	Sec translocon accessory complex subunit YajC OS=Pseudomonas aeruginosa (strain ATCC 15692 / DSM 22644 / CIP 104116 / JCM 14847 / LMG 12228 / 1C / PRS 101 / PAO1) OX=208964 GN=yajC PE=3 SV=1	FALSE	FALSE	TRUE	18.75	1	1	1		3.15
High	Q9HVW3	MlaD domain-containing protein OS=Pseudomonas aeruginosa (strain ATCC 15692 / DSM 22644 / CIP 104116 / JCM 14847 / LMG 12228 / 1C / PRS 101 / PAO1) OX=208964 GN=PA4454 PE=4 SV=1	FALSE	FALSE	TRUE	23.5669	3	3	3	2.0299e+07	0
High	Q9HW01	UDP-N-acetylglucosamine--N-acetylmuramyl-(pentapeptide) pyrophosphoryl-undecaprenol N-acetylglucosamine transferase OS=Pseudomonas aeruginosa (strain ATCC 15692 / DSM 22644 / CIP 104116 / JCM 14847 / LMG 12228 / 1C / PRS 101 / PAO1) OX=208964 GN=murG PE=1 SV=1	FALSE	FALSE	TRUE	3.92157	1	1	1	5.57059e+07	2.9
High	Q9I0J8	NADH-quinone oxidoreductase subunit E OS=Pseudomonas aeruginosa (strain ATCC 15692 / DSM 22644 / CIP 104116 / JCM 14847 / LMG 12228 / 1C / PRS 101 / PAO1) OX=208964 GN=nuoE PE=3 SV=1	FALSE	FALSE	TRUE	8.43373	1	1	1	136264000	2.43
High	Q9I0I4	Probable chemotaxis transducer OS=Pseudomonas aeruginosa (strain ATCC 15692 / DSM 22644 / CIP 104116 / JCM 14847 / LMG 12228 / 1C / PRS 101 / PAO1) OX=208964 GN=PA2654 PE=1 SV=1	FALSE	FALSE	TRUE	3.08123	2	2	1	5557102	4.68
High	Q9I749	Type VI secretion system sheath protein TssB1 OS=Pseudomonas aeruginosa (strain ATCC 15692 / DSM 22644 / CIP 104116 / JCM 14847 / LMG 12228 / 1C / PRS 101 / PAO1) OX=208964 GN=tssB1 PE=1 SV=1	FALSE	FALSE	TRUE	13.9535	1	2	1	2.20263e+07	4.87
High	Q9HX36	Uncharacterized protein OS=Pseudomonas aeruginosa (strain ATCC 15692 / DSM 22644 / CIP 104116 / JCM 14847 / LMG 12228 / 1C / PRS 101 / PAO1) OX=208964 GN=PA3983 PE=1 SV=1	FALSE	FALSE	TRUE	10.7527	2	2	2	1.16223e+07	2.19
High	Q9HX44	Probable acyl-CoA dehydrogenase OS=Pseudomonas aeruginosa (strain ATCC 15692 / DSM 22644 / CIP 104116 / JCM 14847 / LMG 12228 / 1C / PRS 101 / PAO1) OX=208964 GN=PA3972 PE=3 SV=1	FALSE	FALSE	TRUE	8.37887	2	2	2		2.99
High	Q9I7A8	Peptide deformylase OS=Pseudomonas aeruginosa (strain ATCC 15692 / DSM 22644 / CIP 104116 / JCM 14847 / LMG 12228 / 1C / PRS 101 / PAO1) OX=208964 GN=def PE=1 SV=1	FALSE	FALSE	TRUE	8.33333	1	2	1	2.07203e+06	0
High	Q9I043	Uncharacterized protein OS=Pseudomonas aeruginosa (strain ATCC 15692 / DSM 22644 / CIP 104116 / JCM 14847 / LMG 12228 / 1C / PRS 101 / PAO1) OX=208964 GN=PA2800 PE=3 SV=1	FALSE	FALSE	TRUE	13.6752	2	2	2	3.09173e+07	4.51
High	Q9HXZ0	Probable amino acid permease OS=Pseudomonas aeruginosa (strain ATCC 15692 / DSM 22644 / CIP 104116 / JCM 14847 / LMG 12228 / 1C / PRS 101 / PAO1) OX=208964 GN=PA3641 PE=3 SV=1	FALSE	FALSE	TRUE	3.82166	2	2	2	1.18816e+07	4.42
High	Q9HV73	Two-component response regulator CbrB OS=Pseudomonas aeruginosa (strain ATCC 15692 / DSM 22644 / CIP 104116 / JCM 14847 / LMG 12228 / 1C / PRS 101 / PAO1) OX=208964 GN=cbrB PE=4 SV=1	FALSE	FALSE	TRUE	2.92887	1	1	1	6.59406e+07	0
High	Q9HUG1	Probable glycosyl transferase OS=Pseudomonas aeruginosa (strain ATCC 15692 / DSM 22644 / CIP 104116 / JCM 14847 / LMG 12228 / 1C / PRS 101 / PAO1) OX=208964 GN=PA5004 PE=4 SV=1	FALSE	FALSE	TRUE	3.43915	1	1	1	2.56916e+07	2.42
High	Q9I2H4	Probable chemotaxis transducer OS=Pseudomonas aeruginosa (strain ATCC 15692 / DSM 22644 / CIP 104116 / JCM 14847 / LMG 12228 / 1C / PRS 101 / PAO1) OX=208964 GN=PA1930 PE=4 SV=1	FALSE	FALSE	TRUE	6.03248	2	4	1	8.13569e+07	8.84
High	Q9HUQ6	Probable short-chain dehydrogenase OS=Pseudomonas aeruginosa (strain ATCC 15692 / DSM 22644 / CIP 104116 / JCM 14847 / LMG 12228 / 1C / PRS 101 / PAO1) OX=208964 GN=PA4907 PE=1 SV=1	FALSE	FALSE	TRUE	12.253	2	2	2	59503661	2.33
High	Q9HV70	3-methyl-2-oxobutanoate hydroxymethyltransferase 2 OS=Pseudomonas aeruginosa (strain ATCC 15692 / DSM 22644 / CIP 104116 / JCM 14847 / LMG 12228 / 1C / PRS 101 / PAO1) OX=208964 GN=panB2 PE=3 SV=1	FALSE	FALSE	TRUE	9.3985	1	1	1	102536960	2.13
High	Q9HV69	Pantothenate synthetase OS=Pseudomonas aeruginosa (strain ATCC 15692 / DSM 22644 / CIP 104116 / JCM 14847 / LMG 12228 / 1C / PRS 101 / PAO1) OX=208964 GN=panC PE=3 SV=1	FALSE	FALSE	TRUE	4.947	1	1	1	8.64403e+07	2.47
High	Q9HTC8	Probable transcriptional regulator OS=Pseudomonas aeruginosa (strain ATCC 15692 / DSM 22644 / CIP 104116 / JCM 14847 / LMG 12228 / 1C / PRS 101 / PAO1) OX=208964 GN=PA5438 PE=4 SV=1	FALSE	FALSE	TRUE	6.48464	1	1	1	7.44188e+06	0
High	Q9HVX5	Thioesterase domain-containing protein OS=Pseudomonas aeruginosa (strain ATCC 15692 / DSM 22644 / CIP 104116 / JCM 14847 / LMG 12228 / 1C / PRS 101 / PAO1) OX=208964 GN=PA4440 PE=4 SV=1	FALSE	FALSE	TRUE	15.311	2	2	2	5.04998e+06	4.51
High	Q9I5Q3	Tyrosine--tRNA ligase 2 OS=Pseudomonas aeruginosa (strain ATCC 15692 / DSM 22644 / CIP 104116 / JCM 14847 / LMG 12228 / 1C / PRS 101 / PAO1) OX=208964 GN=tyrS2 PE=3 SV=1	FALSE	FALSE	TRUE	10.5263	3	3	3	1.55281e+07	4.34
High	Q9HZA4	3-isopropylmalate dehydratase small subunit OS=Pseudomonas aeruginosa (strain ATCC 15692 / DSM 22644 / CIP 104116 / JCM 14847 / LMG 12228 / 1C / PRS 101 / PAO1) OX=208964 GN=leuD PE=3 SV=1	FALSE	FALSE	TRUE	16.0377	3	3	3	4.52877e+06	1.68
High	Q9I748	Type VI secretion system sheath protein TssC1 OS=Pseudomonas aeruginosa (strain ATCC 15692 / DSM 22644 / CIP 104116 / JCM 14847 / LMG 12228 / 1C / PRS 101 / PAO1) OX=208964 GN=tssC1 PE=1 SV=1	FALSE	FALSE	TRUE	3.21285	1	1	1	1.25795e+06	2.26
High	Q9I5G7	Signal peptidase I OS=Pseudomonas aeruginosa (strain ATCC 15692 / DSM 22644 / CIP 104116 / JCM 14847 / LMG 12228 / 1C / PRS 101 / PAO1) OX=208964 GN=lepB PE=3 SV=1	FALSE	FALSE	TRUE	6.33803	1	1	1	3.67196e+07	1.6
High	G3XCX1	Nitrate reductase (quinone) OS=Pseudomonas aeruginosa (strain ATCC 15692 / DSM 22644 / CIP 104116 / JCM 14847 / LMG 12228 / 1C / PRS 101 / PAO1) OX=208964 GN=narG PE=3 SV=1	FALSE	FALSE	TRUE	3.01348	3	3	2	4.84203e+06	4.31
High	Q9HYJ0	Dihydrolipoamide acetyltransferase component of pyruvate dehydrogenase complex OS=Pseudomonas aeruginosa (strain ATCC 15692 / DSM 22644 / CIP 104116 / JCM 14847 / LMG 12228 / 1C / PRS 101 / PAO1) OX=208964 GN=PA3415 PE=3 SV=1	FALSE	FALSE	TRUE	5.94595	2	2	2	1.26822e+06	2.28
High	Q9HY72	UPF0246 protein PA3539 OS=Pseudomonas aeruginosa (strain ATCC 15692 / DSM 22644 / CIP 104116 / JCM 14847 / LMG 12228 / 1C / PRS 101 / PAO1) OX=208964 GN=PA3539 PE=3 SV=1	FALSE	FALSE	TRUE	12.3552	2	2	2	3.48447e+07	1.81
High	Q9HU38	AsmA domain-containing protein OS=Pseudomonas aeruginosa (strain ATCC 15692 / DSM 22644 / CIP 104116 / JCM 14847 / LMG 12228 / 1C / PRS 101 / PAO1) OX=208964 GN=PA5146 PE=4 SV=1	FALSE	FALSE	TRUE	3.06667	2	3	2	637445	0
High	P50601	Tol-Pal system protein TolB OS=Pseudomonas aeruginosa (strain ATCC 15692 / DSM 22644 / CIP 104116 / JCM 14847 / LMG 12228 / 1C / PRS 101 / PAO1) OX=208964 GN=tolB PE=1 SV=2	FALSE	FALSE	TRUE	10.1852	3	3	3	4.0126e+06	2.15
High	Q9HYV7	Beta-ketodecanoyl-[acyl-carrier-protein] synthase OS=Pseudomonas aeruginosa (strain ATCC 15692 / DSM 22644 / CIP 104116 / JCM 14847 / LMG 12228 / 1C / PRS 101 / PAO1) OX=208964 GN=PA3286 PE=1 SV=1	FALSE	FALSE	TRUE	10.8571	2	2	2	45294767	3.96
High	Q9I020	DUF815 domain-containing protein OS=Pseudomonas aeruginosa (strain ATCC 15692 / DSM 22644 / CIP 104116 / JCM 14847 / LMG 12228 / 1C / PRS 101 / PAO1) OX=208964 GN=PA2823 PE=4 SV=1	FALSE	FALSE	TRUE	10.1351	3	3	3	2.38535e+07	3.56
High	Q9HZF9	Ribosome modulation factor OS=Pseudomonas aeruginosa (strain ATCC 15692 / DSM 22644 / CIP 104116 / JCM 14847 / LMG 12228 / 1C / PRS 101 / PAO1) OX=208964 GN=rmf PE=3 SV=1	FALSE	FALSE	TRUE	25.7143	1	2	1	2.30886e+07	4.97
High	Q9HTQ0	D-amino acid dehydrogenase 1 OS=Pseudomonas aeruginosa (strain ATCC 15692 / DSM 22644 / CIP 104116 / JCM 14847 / LMG 12228 / 1C / PRS 101 / PAO1) OX=208964 GN=dadA1 PE=1 SV=1	FALSE	FALSE	TRUE	6.71296	2	3	2	1.6714e+07	3.55
High	Q9I6M1	CMD domain-containing protein OS=Pseudomonas aeruginosa (strain ATCC 15692 / DSM 22644 / CIP 104116 / JCM 14847 / LMG 12228 / 1C / PRS 101 / PAO1) OX=208964 GN=PA0269 PE=1 SV=1	FALSE	FALSE	TRUE	9.65517	1	1	1	1.34894e+07	3.12
High	G3XDB0	Exodeoxyribonuclease III OS=Pseudomonas aeruginosa (strain ATCC 15692 / DSM 22644 / CIP 104116 / JCM 14847 / LMG 12228 / 1C / PRS 101 / PAO1) OX=208964 GN=crc PE=3 SV=1	FALSE	FALSE	TRUE	8.49421	2	2	2	1.05683e+08	1.96
High	Q9I0Q4	ProQ domain-containing protein OS=Pseudomonas aeruginosa (strain ATCC 15692 / DSM 22644 / CIP 104116 / JCM 14847 / LMG 12228 / 1C / PRS 101 / PAO1) OX=208964 GN=PA2582 PE=4 SV=1	FALSE	FALSE	TRUE	27.6836	3	3	3	1.62619e+06	4.26
High	Q03268	Uncharacterized protein PA2604 OS=Pseudomonas aeruginosa (strain ATCC 15692 / DSM 22644 / CIP 104116 / JCM 14847 / LMG 12228 / 1C / PRS 101 / PAO1) OX=208964 GN=PA2604 PE=3 SV=1	FALSE	FALSE	TRUE	7.20721	1	1	1	3.6779e+06	2.64
High	Q9I4H8	Probable cold-shock protein OS=Pseudomonas aeruginosa (strain ATCC 15692 / DSM 22644 / CIP 104116 / JCM 14847 / LMG 12228 / 1C / PRS 101 / PAO1) OX=208964 GN=PA1159 PE=4 SV=1	FALSE	FALSE	TRUE	15.942	1	2	1	1.08724e+07	1.93
High	Q9I5E2	2-methylisocitrate lyase OS=Pseudomonas aeruginosa (strain ATCC 15692 / DSM 22644 / CIP 104116 / JCM 14847 / LMG 12228 / 1C / PRS 101 / PAO1) OX=208964 GN=prpB PE=3 SV=1	FALSE	FALSE	TRUE	11.745	2	2	2		2.21
High	Q9HVY7	Stringent starvation protein A OS=Pseudomonas aeruginosa (strain ATCC 15692 / DSM 22644 / CIP 104116 / JCM 14847 / LMG 12228 / 1C / PRS 101 / PAO1) OX=208964 GN=sspA PE=3 SV=1	FALSE	FALSE	TRUE	11.2195	2	2	2	1.12391e+07	4.28
High	O50175	N-succinylarginine dihydrolase OS=Pseudomonas aeruginosa (strain ATCC 15692 / DSM 22644 / CIP 104116 / JCM 14847 / LMG 12228 / 1C / PRS 101 / PAO1) OX=208964 GN=astB PE=3 SV=1	FALSE	FALSE	TRUE	6.02679	2	2	2	2.97194e+06	3.86
High	Q9HU78	Histidine utilization repressor OS=Pseudomonas aeruginosa (strain ATCC 15692 / DSM 22644 / CIP 104116 / JCM 14847 / LMG 12228 / 1C / PRS 101 / PAO1) OX=208964 GN=hutC PE=3 SV=1	FALSE	FALSE	TRUE	7.2	1	1	1	4.20196e+07	2.74
High	Q9I0T9	Exodeoxyribonuclease III OS=Pseudomonas aeruginosa (strain ATCC 15692 / DSM 22644 / CIP 104116 / JCM 14847 / LMG 12228 / 1C / PRS 101 / PAO1) OX=208964 GN=xthA PE=3 SV=1	FALSE	FALSE	TRUE	9.62963	3	3	2	1.52878e+07	3.55
High	Q9X4G0	Homogentisate 1,2-dioxygenase OS=Pseudomonas aeruginosa (strain ATCC 15692 / DSM 22644 / CIP 104116 / JCM 14847 / LMG 12228 / 1C / PRS 101 / PAO1) OX=208964 GN=hmgA PE=3 SV=2	FALSE	FALSE	TRUE	9.72222	2	2	2	1.41826e+07	2.25
High	O68562	Outer membrane protein assembly factor BamE OS=Pseudomonas aeruginosa (strain ATCC 15692 / DSM 22644 / CIP 104116 / JCM 14847 / LMG 12228 / 1C / PRS 101 / PAO1) OX=208964 GN=bamE PE=3 SV=1	FALSE	FALSE	TRUE	19.3182	1	1	1	1.0047e+07	3.08
High	Q9HT06	Membrane protein insertase YidC OS=Pseudomonas aeruginosa (strain ATCC 15692 / DSM 22644 / CIP 104116 / JCM 14847 / LMG 12228 / 1C / PRS 101 / PAO1) OX=208964 GN=yidC PE=3 SV=1	FALSE	FALSE	TRUE	4.32526	1	1	1	1.40734e+08	2.13
High	Q9HZK1	S-methyl-5'-thioinosine phosphorylase OS=Pseudomonas aeruginosa (strain ATCC 15692 / DSM 22644 / CIP 104116 / JCM 14847 / LMG 12228 / 1C / PRS 101 / PAO1) OX=208964 GN=PA3004 PE=1 SV=1	FALSE	FALSE	TRUE	7.7551	1	2	1	9.40356e+06	2.36
High	Q9HW11	UPF0234 protein PA4395 OS=Pseudomonas aeruginosa (strain ATCC 15692 / DSM 22644 / CIP 104116 / JCM 14847 / LMG 12228 / 1C / PRS 101 / PAO1) OX=208964 GN=PA4395 PE=3 SV=1	FALSE	FALSE	TRUE	6.91824	1	1	1	1.10818e+07	2.51
High	Q9HTC5	Uncharacterized protein OS=Pseudomonas aeruginosa (strain ATCC 15692 / DSM 22644 / CIP 104116 / JCM 14847 / LMG 12228 / 1C / PRS 101 / PAO1) OX=208964 GN=PA5441 PE=4 SV=1	FALSE	FALSE	TRUE	1.90996	1	1	1	28365055	1.82
High	P72154	tRNA pseudouridine synthase B OS=Pseudomonas aeruginosa (strain ATCC 15692 / DSM 22644 / CIP 104116 / JCM 14847 / LMG 12228 / 1C / PRS 101 / PAO1) OX=208964 GN=truB PE=3 SV=2	FALSE	FALSE	TRUE	3.94737	1	1	1	1.3823e+07	2.51
High	Q9I500	HIT domain-containing protein OS=Pseudomonas aeruginosa (strain ATCC 15692 / DSM 22644 / CIP 104116 / JCM 14847 / LMG 12228 / 1C / PRS 101 / PAO1) OX=208964 GN=PA0959 PE=4 SV=1	FALSE	FALSE	TRUE	6.69856	1	1	1	4.1098e+06	2.42
High	Q9I5G5	Pyridoxine 5'-phosphate synthase OS=Pseudomonas aeruginosa (strain ATCC 15692 / DSM 22644 / CIP 104116 / JCM 14847 / LMG 12228 / 1C / PRS 101 / PAO1) OX=208964 GN=pdxJ PE=3 SV=1	FALSE	FALSE	TRUE	9.67742	2	2	2	1.85861e+06	2.05
High	Q9HXY4	Outer membrane protein assembly factor BamA OS=Pseudomonas aeruginosa (strain ATCC 15692 / DSM 22644 / CIP 104116 / JCM 14847 / LMG 12228 / 1C / PRS 101 / PAO1) OX=208964 GN=opr86 PE=3 SV=1	FALSE	FALSE	TRUE	4.64241	3	3	3	3.68347e+06	0
High	Q9I4D6	Probable hydrolase OS=Pseudomonas aeruginosa (strain ATCC 15692 / DSM 22644 / CIP 104116 / JCM 14847 / LMG 12228 / 1C / PRS 101 / PAO1) OX=208964 GN=PA1202 PE=1 SV=1	FALSE	FALSE	TRUE	20	2	2	2	1.85056e+07	0
High	Q9HTQ2	Alanine racemase, catabolic OS=Pseudomonas aeruginosa (strain ATCC 15692 / DSM 22644 / CIP 104116 / JCM 14847 / LMG 12228 / 1C / PRS 101 / PAO1) OX=208964 GN=dadX PE=1 SV=1	FALSE	FALSE	TRUE	3.92157	1	1	1	1.3544e+07	2.59
High	Q9HVF1	Probable malate:quinone oxidoreductase 2 OS=Pseudomonas aeruginosa (strain ATCC 15692 / DSM 22644 / CIP 104116 / JCM 14847 / LMG 12228 / 1C / PRS 101 / PAO1) OX=208964 GN=mqo2 PE=3 SV=1	FALSE	FALSE	TRUE	8.28402	2	2	2	2.58681e+07	2.85
High	Q9HX01	Probable acetyltransferase OS=Pseudomonas aeruginosa (strain ATCC 15692 / DSM 22644 / CIP 104116 / JCM 14847 / LMG 12228 / 1C / PRS 101 / PAO1) OX=208964 GN=PA4026 PE=1 SV=1	FALSE	FALSE	TRUE	7.84314	1	1	1	876271	2.02
High	Q9HT22	Bifunctional protein GlmU OS=Pseudomonas aeruginosa (strain ATCC 15692 / DSM 22644 / CIP 104116 / JCM 14847 / LMG 12228 / 1C / PRS 101 / PAO1) OX=208964 GN=glmU PE=3 SV=1	FALSE	FALSE	TRUE	4.40529	1	1	1	2.08882e+07	2.08
High	Q9HUB5	Sec-independent protein translocase protein TatA OS=Pseudomonas aeruginosa (strain ATCC 15692 / DSM 22644 / CIP 104116 / JCM 14847 / LMG 12228 / 1C / PRS 101 / PAO1) OX=208964 GN=tatA PE=3 SV=1	FALSE	FALSE	TRUE	53.6585	2	2	2	2.54656e+07	0
High	Q9I2T9	Lon protease OS=Pseudomonas aeruginosa (strain ATCC 15692 / DSM 22644 / CIP 104116 / JCM 14847 / LMG 12228 / 1C / PRS 101 / PAO1) OX=208964 GN=lon PE=2 SV=1	FALSE	FALSE	TRUE	1.8797	1	1	1		1.97
High	Q9HWX5	6,7-dimethyl-8-ribityllumazine synthase OS=Pseudomonas aeruginosa (strain ATCC 15692 / DSM 22644 / CIP 104116 / JCM 14847 / LMG 12228 / 1C / PRS 101 / PAO1) OX=208964 GN=ribH PE=3 SV=1	FALSE	FALSE	TRUE	22.1519	3	3	3	1.42763e+07	1.71
[truncated: 272 more rows]

## Sheet: Protocell
Protein FDR Confidence	Accession	Description	Contaminant	E.Coli	P.aeruginosa	Coverage	# Peptides	# PSMs	# Unique Peptides	Area: F4: Sample	Score Sequest HT
High	G3XD87	Respiratory nitrate reductase beta chain OS=Pseudomonas aeruginosa (strain ATCC 15692 / DSM 22644 / CIP 104116 / JCM 14847 / LMG 12228 / 1C / PRS 101 / PAO1) OX=208964 GN=narH PE=4 SV=1	FALSE	TRUE	TRUE	5.06823	2	2	2	2.00928e+07	0
High	A0A140NC89	5-carboxymethyl-2-hydroxymuconate semialdehyde dehydrogenase OS=Escherichia coli (strain B / BL21-DE3) OX=469008 GN=hpaE PE=3 SV=1	FALSE	TRUE	TRUE	2.45902	1	1	1	2.29157e+06	2.37
High	A0A140NH65	60 kDa chaperonin OS=Escherichia coli (strain B / BL21-DE3) OX=469008 GN=groL PE=3 SV=1	FALSE	TRUE	FALSE	94.3431	62	268	46	4.85201e+09	430.27
High	A0A140N6A5	Chaperone protein ClpB OS=Escherichia coli (strain B / BL21-DE3) OX=469008 GN=clpB PE=3 SV=1	FALSE	TRUE	FALSE	75.6126	67	141	57	2.73128e+09	217.2
High	A0A140N6W0	Elongation factor Tu OS=Escherichia coli (strain B / BL21-DE3) OX=469008 GN=tuf PE=1 SV=1	FALSE	TRUE	FALSE	95.4315	52	328	41	1.97665e+10	481.13
High	A0A140NGF8	Tryptophanase OS=Escherichia coli (strain B / BL21-DE3) OX=469008 GN=tnaA PE=3 SV=1	FALSE	TRUE	FALSE	88.7473	56	211	56	1.26678e+10	271.04
High	A0A140NDL0	Pyruvate dehydrogenase E1 component OS=Escherichia coli (strain B / BL21-DE3) OX=469008 GN=ECBD_3505 PE=4 SV=1	FALSE	TRUE	FALSE	75.5355	68	172	67	5.80627e+09	247.59
High	A0A140NCE4	Aldehyde-alcohol dehydrogenase OS=Escherichia coli (strain B / BL21-DE3) OX=469008 GN=adhE PE=3 SV=1	FALSE	TRUE	FALSE	69.4725	50	129	50	3.00826e+09	235.21
High	A0A140N7C7	Elongation factor G OS=Escherichia coli (strain B / BL21-DE3) OX=469008 GN=fusA PE=3 SV=1	FALSE	TRUE	FALSE	70.7386	43	158	43	4.6715e+09	224.75
High	A0A140NFV3	Chaperone protein DnaK OS=Escherichia coli (strain B / BL21-DE3) OX=469008 GN=dnaK PE=2 SV=1	FALSE	TRUE	FALSE	61.2853	49	112	45	4.55386e+09	151.73
High	A0A140N6E5	D-tagatose-1,6-bisphosphate aldolase subunit GatZ OS=Escherichia coli (strain B / BL21-DE3) OX=469008 GN=gatZ PE=3 SV=1	FALSE	TRUE	FALSE	87.8571	36	158	36	8.67158e+09	273.88
High	A0A140NBS3	Dihydrolipoyl dehydrogenase OS=Escherichia coli (strain B / BL21-DE3) OX=469008 GN=lpdA PE=3 SV=1	FALSE	TRUE	FALSE	72.5738	43	150	43	2.89772e+09	259.1
High	A0A140N753	Alpha-1,4 glucan phosphorylase OS=Escherichia coli (strain B / BL21-DE3) OX=469008 GN=ECBD_0328 PE=3 SV=1	FALSE	TRUE	FALSE	58.5947	44	102	44	1.38062e+09	124.37
High	A0A140NE66	Oxoglutarate dehydrogenase (succinyl-transferring) OS=Escherichia coli (strain B / BL21-DE3) OX=469008 GN=sucA PE=3 SV=1	FALSE	TRUE	FALSE	50.268	41	87	41	1.39001e+09	132.59
High	A0A140NFP9	Aconitate hydratase B OS=Escherichia coli (strain B / BL21-DE3) OX=469008 GN=acnB PE=3 SV=1	FALSE	TRUE	FALSE	61.0405	45	119	42	2.98236e+09	200.74
High	A0A140SS80	DNA-directed RNA polymerase subunit beta OS=Escherichia coli (strain B / BL21-DE3) OX=469008 GN=rpoB PE=3 SV=1	FALSE	TRUE	FALSE	48.7332	54	100	50	1.34183e+09	153.01
High	A0A140NHS0	ATP synthase subunit beta OS=Escherichia coli (strain B / BL21-DE3) OX=469008 GN=atpD PE=3 SV=1	FALSE	TRUE	FALSE	87.6087	37	93	24	2.63413e+09	172.07
High	A0A140NE27	Acetyltransferase component of pyruvate dehydrogenase complex OS=Escherichia coli (strain B / BL21-DE3) OX=469008 GN=aceF PE=3 SV=1	FALSE	TRUE	FALSE	64.4444	42	101	42	3.02985e+09	158.41
High	A0A140NAN5	Porin Gram-negative type OS=Escherichia coli (strain B / BL21-DE3) OX=469008 GN=ompF PE=3 SV=1	FALSE	TRUE	FALSE	91.7127	34	274	33	6.19197e+09	567.26
High	A0A140ND72	ATP synthase subunit alpha OS=Escherichia coli (strain B / BL21-DE3) OX=469008 GN=atpA PE=3 SV=1	FALSE	TRUE	FALSE	64.7173	36	85	34	1.57828e+09	133.36
High	A0A140NH27	DNA-directed RNA polymerase subunit beta' OS=Escherichia coli (strain B / BL21-DE3) OX=469008 GN=rpoC PE=3 SV=1	FALSE	TRUE	FALSE	41.0092	46	68	34	8.75859e+08	110.75
High	A0A140NBA5	30S ribosomal protein S1 OS=Escherichia coli (strain B / BL21-DE3) OX=469008 GN=rpsA PE=3 SV=1	FALSE	TRUE	FALSE	70.1975	41	112	40	2.47813e+09	147.11
High	A0A140NE14	Lysine--tRNA ligase OS=Escherichia coli (strain B / BL21-DE3) OX=469008 GN=lysS PE=3 SV=1	FALSE	TRUE	FALSE	70.099	39	95	30	2.27282e+09	147.4
High	A0A140N8E1	Phosphoglycerate kinase OS=Escherichia coli (strain B / BL21-DE3) OX=469008 GN=pgk PE=3 SV=1	FALSE	TRUE	FALSE	94.3152	34	96	32	2.86433e+09	143.41
High	A0A140ND61	Chaperone protein HtpG OS=Escherichia coli (strain B / BL21-DE3) OX=469008 GN=htpG PE=3 SV=1	FALSE	TRUE	FALSE	63.3013	36	67	35	1.55944e+09	105.47
High	A0A140N4G4	Glycine dehydrogenase (decarboxylating) OS=Escherichia coli (strain B / BL21-DE3) OX=469008 GN=gcvP PE=3 SV=1	FALSE	TRUE	FALSE	52.3511	31	61	31	1.59927e+09	97.82
High	A0A140NF01	Transcription termination factor Rho OS=Escherichia coli (strain B / BL21-DE3) OX=469008 GN=rho PE=3 SV=1	FALSE	TRUE	FALSE	70.4057	41	86	32	1.39174e+09	110.09
High	A0A140N6W9	Alanine--tRNA ligase OS=Escherichia coli (strain B / BL21-DE3) OX=469008 GN=alaS PE=3 SV=1	FALSE	TRUE	FALSE	53.4247	37	69	35	9.38741e+08	127.2
High	A0A140NBE7	Formate C-acetyltransferase OS=Escherichia coli (strain B / BL21-DE3) OX=469008 GN=pflB PE=3 SV=1	FALSE	TRUE	FALSE	57.6316	38	73	37	1.00025e+09	115.11
High	A0A140N510	Phosphoenolpyruvate carboxykinase (ATP) OS=Escherichia coli (strain B / BL21-DE3) OX=469008 GN=pckA PE=3 SV=1	FALSE	TRUE	FALSE	73.3333	33	60	33	1.08338e+09	101.16
High	A0A140NE28	Alpha-galactosidase OS=Escherichia coli (strain B / BL21-DE3) OX=469008 GN=melA PE=3 SV=1	FALSE	TRUE	FALSE	58.5366	29	67	29	2.2266e+09	66.76
High	A0A140N9P3	NADH-quinone oxidoreductase OS=Escherichia coli (strain B / BL21-DE3) OX=469008 GN=nuoG PE=3 SV=1	FALSE	TRUE	FALSE	51.9824	32	60	32	1.55825e+09	115.26
High	A0A140NET2	Trigger factor OS=Escherichia coli (strain B / BL21-DE3) OX=469008 GN=tig PE=3 SV=1	FALSE	TRUE	FALSE	65.9722	35	77	35	1.11903e+09	128.93
High	A0A140N982	Bifunctional protein PutA OS=Escherichia coli (strain B / BL21-DE3) OX=469008 GN=putA PE=3 SV=1	FALSE	TRUE	FALSE	33.6364	33	54	33	8.66966e+08	75.25
High	A0A140NA84	Phosphate acetyltransferase OS=Escherichia coli (strain B / BL21-DE3) OX=469008 GN=pta PE=3 SV=1	FALSE	TRUE	FALSE	48.4594	32	62	32	5.28027e+08	104.88
High	A0A140SS73	Glycerol kinase OS=Escherichia coli (strain B / BL21-DE3) OX=469008 GN=glpK PE=3 SV=1	FALSE	TRUE	FALSE	67.7291	35	82	31	5.59398e+08	131.53
High	A0A140N6G0	Enolase OS=Escherichia coli (strain B / BL21-DE3) OX=469008 GN=eno PE=3 SV=1	FALSE	TRUE	FALSE	83.3333	33	88	32	2.67862e+09	146.75
High	A0A140N783	Glyceraldehyde-3-phosphate dehydrogenase OS=Escherichia coli (strain B / BL21-DE3) OX=469008 GN=gapA PE=3 SV=1	FALSE	TRUE	FALSE	83.9879	33	80	32	6.78866e+09	110.77
High	A0A140NDN9	DNA protection during starvation protein OS=Escherichia coli (strain B / BL21-DE3) OX=469008 GN=dps PE=3 SV=1	FALSE	TRUE	FALSE	92.8144	23	78	23	4.49401e+09	125.92
High	A0A140NE25	Glutamine--fructose-6-phosphate aminotransferase [isomerizing] OS=Escherichia coli (strain B / BL21-DE3) OX=469008 GN=glmS PE=3 SV=1	FALSE	TRUE	FALSE	54.3514	24	43	24	4.91779e+08	76.05
High	A0A140NAN3	Isocitrate dehydrogenase [NADP] OS=Escherichia coli (strain B / BL21-DE3) OX=469008 GN=icd PE=3 SV=1	FALSE	TRUE	FALSE	63.4615	29	56	23	2.35218e+09	78.47
High	A0A140NGV6	Valine--tRNA ligase OS=Escherichia coli (strain B / BL21-DE3) OX=469008 GN=valS PE=3 SV=1	FALSE	TRUE	FALSE	47.1083	34	59	30	6.42548e+08	84.51
High	A0A140NAA1	Ribonuclease E OS=Escherichia coli (strain B / BL21-DE3) OX=469008 GN=rne PE=3 SV=1	FALSE	TRUE	FALSE	44.2036	28	49	27	2.95566e+08	83.59
High	A0A140N821	Fructose-bisphosphate aldolase OS=Escherichia coli (strain B / BL21-DE3) OX=469008 GN=fbaA PE=3 SV=1	FALSE	TRUE	FALSE	68.8022	20	47	20	4.62378e+09	92.35
High	A0A140NDE0	Proline--tRNA ligase OS=Escherichia coli (strain B / BL21-DE3) OX=469008 GN=proS PE=3 SV=1	FALSE	TRUE	FALSE	59.6154	26	43	23	6.5619e+08	83.79
High	A0A140N8Y0	Fumarate hydratase class I OS=Escherichia coli (strain B / BL21-DE3) OX=469008 GN=fumB PE=3 SV=1	FALSE	TRUE	FALSE	62.0438	24	42	24	8.44689e+08	79.05
High	A0A140SS67	Phosphoenolpyruvate carboxylase OS=Escherichia coli (strain B / BL21-DE3) OX=469008 GN=ppc PE=3 SV=1	FALSE	TRUE	FALSE	41.4496	30	49	30	8.4297e+08	60.77
High	A0A140N8X9	Serine hydroxymethyltransferase OS=Escherichia coli (strain B / BL21-DE3) OX=469008 GN=glyA PE=3 SV=1	FALSE	TRUE	FALSE	58.2734	27	49	24	1.00524e+09	64.35
High	A0A140N2U0	DNA-directed RNA polymerase subunit alpha OS=Escherichia coli (strain B / BL21-DE3) OX=469008 GN=rpoA PE=3 SV=1	FALSE	TRUE	FALSE	87.234	26	65	20	2.07005e+09	77.53
High	A0A140N775	Malate dehydrogenase OS=Escherichia coli (strain B / BL21-DE3) OX=469008 GN=mdh PE=3 SV=1	FALSE	TRUE	FALSE	80.1282	20	84	20	2.25759e+09	162.13
High	A0A140N487	2-amino-3-ketobutyrate coenzyme A ligase OS=Escherichia coli (strain B / BL21-DE3) OX=469008 GN=kbl PE=3 SV=1	FALSE	TRUE	FALSE	63.5678	22	56	22	1.17874e+09	90.63
High	A0A140NFK2	30S ribosomal protein S2 OS=Escherichia coli (strain B / BL21-DE3) OX=469008 GN=rpsB PE=3 SV=1	FALSE	TRUE	FALSE	63.9004	20	73	15	3.16611e+09	111.43
High	A0A140NDE3	Outer membrane protein A OS=Escherichia coli (strain B / BL21-DE3) OX=469008 GN=ompA PE=3 SV=1	FALSE	TRUE	FALSE	70.5202	25	95	25	1.71695e+10	176.08
High	A0A140ND98	Isoleucine--tRNA ligase OS=Escherichia coli (strain B / BL21-DE3) OX=469008 GN=ileS PE=3 SV=1	FALSE	TRUE	FALSE	46.5885	34	48	34	8.32435e+08	62.82
High	A0A140NF66	Catalase-peroxidase OS=Escherichia coli (strain B / BL21-DE3) OX=469008 GN=katG PE=3 SV=1	FALSE	TRUE	FALSE	40.9091	31	64	31	1.1775e+09	87.85
High	A0A140ND17	Protein translocase subunit SecA OS=Escherichia coli (strain B / BL21-DE3) OX=469008 GN=secA PE=2 SV=1	FALSE	TRUE	FALSE	41.2875	27	39	27	2.99476e+08	54.65
High	A0A140NCK8	Aconitate hydratase OS=Escherichia coli (strain B / BL21-DE3) OX=469008 GN=acnA PE=3 SV=1	FALSE	TRUE	FALSE	42.9854	25	39	23	4.65428e+08	59.62
High	A0A140NDT0	Aminopeptidase N OS=Escherichia coli (strain B / BL21-DE3) OX=469008 GN=pepN PE=3 SV=1	FALSE	TRUE	FALSE	41.4943	23	39	22	5.66587e+08	60.08
High	A0A140NBM7	Leucine--tRNA ligase OS=Escherichia coli (strain B / BL21-DE3) OX=469008 GN=leuS PE=3 SV=1	FALSE	TRUE	FALSE	41.3953	36	45	36	1.06938e+09	64.32
High	A0A140NGN0	Aspartate ammonia-lyase OS=Escherichia coli (strain B / BL21-DE3) OX=469008 GN=aspA PE=3 SV=1	FALSE	TRUE	FALSE	66.9456	28	62	27	3.3429e+09	85.02
High	A0A140NCD0	Maltodextrin-binding protein OS=Escherichia coli (strain B / BL21-DE3) OX=469008 GN=malE PE=3 SV=1	FALSE	TRUE	FALSE	74.7475	25	44	25	1.04607e+09	71.92
High	A0A140NC97	Alkyl hydroperoxide reductase C OS=Escherichia coli (strain B / BL21-DE3) OX=469008 GN=ahpC PE=1 SV=1	FALSE	TRUE	FALSE	79.1444	15	72	15	2.98672e+09	105.09
High	A0A140NEK1	Adenylosuccinate synthetase OS=Escherichia coli (strain B / BL21-DE3) OX=469008 GN=purA PE=3 SV=1	FALSE	TRUE	FALSE	63.1944	30	50	28	6.4749e+08	60.59
High	A0A140NDV9	Transaldolase OS=Escherichia coli (strain B / BL21-DE3) OX=469008 GN=tal PE=3 SV=1	FALSE	TRUE	FALSE	85.1735	28	63	26	2.09895e+09	89.09
High	A0A140N6Z9	30S ribosomal protein S5 OS=Escherichia coli (strain B / BL21-DE3) OX=469008 GN=rpsE PE=3 SV=1	FALSE	TRUE	FALSE	77.2455	13	79	13	8.13203e+08	119.31
High	A0A140NC10	Citrate synthase OS=Escherichia coli (strain B / BL21-DE3) OX=469008 GN=gltA PE=3 SV=1	FALSE	TRUE	FALSE	43.3255	20	58	20	1.45603e+09	93.37
High	A0A140ND68	Aminotransferase OS=Escherichia coli (strain B / BL21-DE3) OX=469008 GN=aspC PE=3 SV=1	FALSE	TRUE	FALSE	61.8687	29	58	29	1.97244e+09	107.47
High	A0A140NFB9	Formate dehydrogenase, alpha subunit OS=Escherichia coli (strain B / BL21-DE3) OX=469008 GN=fdnG PE=3 SV=1	FALSE	TRUE	FALSE	39.7638	25	37	25	3.77495e+08	64.69
High	A0A140NFD7	Elongation factor Ts OS=Escherichia coli (strain B / BL21-DE3) OX=469008 GN=tsf PE=3 SV=1	FALSE	TRUE	FALSE	73.4982	21	65	21	2.55858e+09	103.68
High	A0A140N7J1	50S ribosomal protein L2 OS=Escherichia coli (strain B / BL21-DE3) OX=469008 GN=rplB PE=3 SV=1	FALSE	TRUE	FALSE	58.6081	17	58	17	4.21059e+09	64.42
High	A0A140NDX4	Dihydrolipoyllysine-residue succinyltransferase component of 2-oxoglutarate dehydrogenase complex OS=Escherichia coli (strain B / BL21-DE3) OX=469008 GN=odhB PE=3 SV=1	FALSE	TRUE	FALSE	39.7531	22	41	22	657575670	59.29
High	A0A140N745	NADH-quinone oxidoreductase subunit C/D OS=Escherichia coli (strain B / BL21-DE3) OX=469008 GN=nuoC PE=3 SV=1	FALSE	TRUE	FALSE	52.5	28	44	26	5.85872e+08	50.11
High	A0A140NFM6	Cell division protein FtsZ OS=Escherichia coli (strain B / BL21-DE3) OX=469008 GN=ftsZ PE=3 SV=1	FALSE	TRUE	FALSE	72.0627	23	40	22	1.17355e+09	64.54
High	A0A140N810	Transketolase OS=Escherichia coli (strain B / BL21-DE3) OX=469008 GN=tkt PE=3 SV=1	FALSE	TRUE	FALSE	46.6063	23	45	22	1.15942e+09	79.16
High	A0A140N9N5	Phosphoenolpyruvate-protein phosphotransferase OS=Escherichia coli (strain B / BL21-DE3) OX=469008 GN=ptsI PE=3 SV=1	FALSE	TRUE	FALSE	38.6087	23	35	23	7.70865e+08	62.21
High	A0A140N870	Alcohol dehydrogenase GroES domain protein OS=Escherichia coli (strain B / BL21-DE3) OX=469008 GN=gatD PE=3 SV=1	FALSE	TRUE	FALSE	53.1792	22	50	22	3.27073e+09	74.52
High	A0A140NBF4	Succinate--CoA ligase [ADP-forming] subunit beta OS=Escherichia coli (strain B / BL21-DE3) OX=469008 GN=sucC PE=3 SV=1	FALSE	TRUE	FALSE	63.1443	25	49	22	2149097954	67.49
High	A0A140NA80	Succinate dehydrogenase flavoprotein subunit OS=Escherichia coli (strain B / BL21-DE3) OX=469008 GN=sdhA PE=3 SV=1	FALSE	TRUE	FALSE	41.8367	17	41	15	6.69849e+08	52.53
High	A0A140N5A3	50S ribosomal protein L5 OS=Escherichia coli (strain B / BL21-DE3) OX=469008 GN=rplE PE=3 SV=1	FALSE	TRUE	FALSE	76.5363	17	75	16	3876684092	100.08
High	A0A140N5L3	ATP-dependent zinc metalloprotease FtsH OS=Escherichia coli (strain B / BL21-DE3) OX=469008 GN=ftsH PE=3 SV=1	FALSE	TRUE	FALSE	45.7496	23	33	22	4.40305e+08	49.93
High	A0A140NBL4	Outer membrane protein assembly factor BamA OS=Escherichia coli (strain B / BL21-DE3) OX=469008 GN=bamA PE=3 SV=1	FALSE	TRUE	FALSE	44.321	25	36	25	3.86841e+08	46.32
High	A0A140N4K1	30S ribosomal protein S3 OS=Escherichia coli (strain B / BL21-DE3) OX=469008 GN=rpsC PE=3 SV=1	FALSE	TRUE	FALSE	65.2361	17	48	15	3.81496e+09	66.52
High	A0A140N9D9	2,3-bisphosphoglycerate-dependent phosphoglycerate mutase OS=Escherichia coli (strain B / BL21-DE3) OX=469008 GN=gpmA PE=3 SV=1	FALSE	TRUE	FALSE	71.6	18	46	18	1.33089e+09	62.87
High	A0A140NDB1	Aminoacyl-histidine dipeptidase OS=Escherichia coli (strain B / BL21-DE3) OX=469008 GN=pepD PE=4 SV=1	FALSE	TRUE	FALSE	54.2268	20	30	20	5.29243e+08	38.3
High	A0A140N3T4	Translation initiation factor IF-2 OS=Escherichia coli (strain B / BL21-DE3) OX=469008 GN=infB PE=3 SV=1	FALSE	TRUE	FALSE	35.0562	25	38	24	3.27494e+08	56
High	A0A140N8S8	Lysine--tRNA ligase OS=Escherichia coli (strain B / BL21-DE3) OX=469008 GN=lysS PE=3 SV=1	FALSE	TRUE	FALSE	54.2574	29	52	20	1.75932e+08	62.06
High	A0A140NCH9	DNA-binding protein OS=Escherichia coli (strain B / BL21-DE3) OX=469008 GN=hns PE=3 SV=1	FALSE	TRUE	FALSE	85.4015	18	60	18	1.3527e+09	125.38
High	A0A140N9Z7	NADH-quinone oxidoreductase subunit F OS=Escherichia coli (strain B / BL21-DE3) OX=469008 GN=nuoF PE=3 SV=1	FALSE	TRUE	FALSE	63.3708	21	36	17	6.24885e+08	54.4
High	A0A140N932	CTP synthase OS=Escherichia coli (strain B / BL21-DE3) OX=469008 GN=pyrG PE=3 SV=1	FALSE	TRUE	FALSE	47.8899	24	36	24	9.87239e+08	52.12
High	A0A140NA92	3-oxoacyl-[acyl-carrier-protein] synthase 2 OS=Escherichia coli (strain B / BL21-DE3) OX=469008 GN=fabF PE=3 SV=1	FALSE	TRUE	FALSE	67.5545	18	34	18	1.02184e+09	64.24
High	A0A140NCS9	Ribose-phosphate pyrophosphokinase OS=Escherichia coli (strain B / BL21-DE3) OX=469008 GN=prs PE=3 SV=1	FALSE	TRUE	FALSE	48.0712	14	38	13	2.14117e+09	66.56
High	A0A140N8N4	Phenylalanine--tRNA ligase beta subunit OS=Escherichia coli (strain B / BL21-DE3) OX=469008 GN=pheT PE=3 SV=1	FALSE	TRUE	FALSE	27.1698	19	28	19	3.28548e+08	43.77
High	A0A140N9V8	Pyruvate kinase OS=Escherichia coli (strain B / BL21-DE3) OX=469008 GN=pykF PE=3 SV=1	FALSE	TRUE	FALSE	62.766	24	36	24	9.21203e+08	54.91
High	A0A140N548	30S ribosomal protein S4 OS=Escherichia coli (strain B / BL21-DE3) OX=469008 GN=rpsD PE=3 SV=1	FALSE	TRUE	FALSE	63.1068	17	58	13	4.89943e+09	88.27
High	A0A140NDV1	50S ribosomal protein L9 OS=Escherichia coli (strain B / BL21-DE3) OX=469008 GN=rplI PE=3 SV=1	FALSE	TRUE	FALSE	81.8792	17	59	16	3.13624e+09	69.78
High	A0A140N7E6	Threonine--tRNA ligase OS=Escherichia coli (strain B / BL21-DE3) OX=469008 GN=thrS PE=3 SV=1	FALSE	TRUE	FALSE	50.7788	22	33	20	2.77687e+08	50.81
High	A0A140N6W8	30S ribosomal protein S7 OS=Escherichia coli (strain B / BL21-DE3) OX=469008 GN=rpsG PE=3 SV=1	FALSE	TRUE	FALSE	65.3846	14	50	14	2.57449e+09	89.4
High	A0A140NER9	DNA polymerase I OS=Escherichia coli (strain B / BL21-DE3) OX=469008 GN=polA PE=3 SV=1	FALSE	TRUE	FALSE	35.0216	25	34	25	2.31933e+08	48.51
High	A0A140N7M5	Acetate kinase OS=Escherichia coli (strain B / BL21-DE3) OX=469008 GN=ackA PE=3 SV=1	FALSE	TRUE	FALSE	50.5	13	33	13	1.28331e+09	60.47
High	A0A140N9G9	Beta-ketoacyl synthase OS=Escherichia coli (strain B / BL21-DE3) OX=469008 GN=fabB PE=3 SV=1	FALSE	TRUE	FALSE	57.1429	14	26	14	4.85315e+08	47.45
High	A0A140N2U8	Glycine--tRNA ligase beta subunit OS=Escherichia coli (strain B / BL21-DE3) OX=469008 GN=glyS PE=3 SV=1	FALSE	TRUE	FALSE	52.5399	26	35	26	4.96077e+08	48.51
High	A0A140N5J6	2-hydroxy-3-oxopropionate reductase OS=Escherichia coli (strain B / BL21-DE3) OX=469008 GN=garR PE=3 SV=1	FALSE	TRUE	FALSE	67.5676	12	30	12	3.01008e+09	58.21
High	A0A140NFM7	50S ribosomal protein L1 OS=Escherichia coli (strain B / BL21-DE3) OX=469008 GN=rplA PE=3 SV=1	FALSE	TRUE	FALSE	65.3846	17	64	17	4.89257e+09	120.58
High	A0A140NC56	Purine nucleoside phosphorylase DeoD-type OS=Escherichia coli (strain B / BL21-DE3) OX=469008 GN=deoD PE=3 SV=1	FALSE	TRUE	FALSE	64.4351	14	52	14	2.48928e+09	74.16
High	A0A140N598	50S ribosomal protein L13 OS=Escherichia coli (strain B / BL21-DE3) OX=469008 GN=rplM PE=3 SV=1	FALSE	TRUE	FALSE	81.6901	16	52	15	8.8256e+08	74.73
High	A0A140N6N1	Glycerol-3-phosphate dehydrogenase OS=Escherichia coli (strain B / BL21-DE3) OX=469008 GN=ECBD_0316 PE=3 SV=1	FALSE	TRUE	FALSE	53.493	21	32	21	3.37385e+08	34.66
High	A0A140NCG6	Cytochrome bd ubiquinol oxidase subunit I OS=Escherichia coli (strain B / BL21-DE3) OX=469008 GN=cydA PE=3 SV=1	FALSE	TRUE	FALSE	24.5211	16	37	16	1.18432e+09	64.96
High	A0A140N7U4	6-phosphogluconate dehydrogenase, decarboxylating OS=Escherichia coli (strain B / BL21-DE3) OX=469008 GN=gndA PE=3 SV=1	FALSE	TRUE	FALSE	62.6068	26	37	26	1290250175	48.03
High	A0A140NA83	Enoyl-[acyl-carrier-protein] reductase [NADH] OS=Escherichia coli (strain B / BL21-DE3) OX=469008 GN=fabI PE=1 SV=1	FALSE	TRUE	FALSE	55.3435	12	28	11	2.45122e+09	45.99
High	A0A140NEY2	Maltoporin OS=Escherichia coli (strain B / BL21-DE3) OX=469008 GN=lamB PE=2 SV=1	FALSE	TRUE	FALSE	49.7758	16	32	16	6.40678e+08	59.85
High	A0A140NDZ9	Succinate dehydrogenase iron-sulfur subunit OS=Escherichia coli (strain B / BL21-DE3) OX=469008 GN=sdhB PE=3 SV=1	FALSE	TRUE	FALSE	81.0924	17	46	15	1.23723e+09	78.53
High	A0A140NHC7	GTP-binding protein TypA OS=Escherichia coli (strain B / BL21-DE3) OX=469008 GN=typA PE=4 SV=1	FALSE	TRUE	FALSE	35.5848	17	30	16	4.40289e+08	50.11
High	A0A140N4N4	Peptidase B OS=Escherichia coli (strain B / BL21-DE3) OX=469008 GN=pepB PE=3 SV=1	FALSE	TRUE	FALSE	66.5105	21	27	21	5.15466e+08	41.16
High	A0A140NF86	ATP-dependent protease ATPase subunit HslU OS=Escherichia coli (strain B / BL21-DE3) OX=469008 GN=hslU PE=2 SV=1	FALSE	TRUE	FALSE	48.0813	22	34	19	1.97841e+08	50.04
High	A0A140N801	Glutathione synthetase OS=Escherichia coli (strain B / BL21-DE3) OX=469008 GN=gshB PE=3 SV=1	FALSE	TRUE	FALSE	54.1139	17	28	17	4.04022e+08	43.42
High	A0A140NFD2	Lipoprotein OS=Escherichia coli (strain B / BL21-DE3) OX=469008 GN=metQ PE=3 SV=1	FALSE	TRUE	FALSE	56.0886	12	34	12	1.33481e+09	67.8
High	A0A140NCD7	Glucose-6-phosphate isomerase OS=Escherichia coli (strain B / BL21-DE3) OX=469008 GN=pgi PE=3 SV=1	FALSE	TRUE	FALSE	46.0838	17	24	17	4.98427e+08	32.22
High	A0A140SS95	5-methyltetrahydropteroyltriglutamate--homocysteine methyltransferase OS=Escherichia coli (strain B / BL21-DE3) OX=469008 GN=metE PE=3 SV=1	FALSE	TRUE	FALSE	35.4582	21	31	21	9.62308e+08	46.85
High	A0A140NI98	ATP synthase subunit b OS=Escherichia coli (strain B / BL21-DE3) OX=469008 GN=atpF PE=3 SV=1	FALSE	TRUE	FALSE	46.1538	11	35	11	1.03779e+08	64.5
High	A0A140N2S3	50S ribosomal protein L22 OS=Escherichia coli (strain B / BL21-DE3) OX=469008 GN=rplV PE=3 SV=1	FALSE	TRUE	FALSE	64.5455	13	51	13	2.17671e+09	53.5
High	A0A140N8C6	Methionine--tRNA ligase OS=Escherichia coli (strain B / BL21-DE3) OX=469008 GN=metG PE=3 SV=1	FALSE	TRUE	FALSE	45.3471	20	28	20	2.20676e+08	38.69
High	A0A140N6M4	ADP-L-glycero-D-manno-heptose-6-epimerase OS=Escherichia coli (strain B / BL21-DE3) OX=469008 GN=hldD PE=3 SV=1	FALSE	TRUE	FALSE	55.4839	17	34	16	1.12299e+09	41.47
High	A0A140NEL5	Triosephosphate isomerase OS=Escherichia coli (strain B / BL21-DE3) OX=469008 GN=tpiA PE=3 SV=1	FALSE	TRUE	FALSE	91.3725	16	37	16	5.22756e+08	59.58
High	A0A140N9G2	Succinate--CoA ligase [ADP-forming] subunit alpha OS=Escherichia coli (strain B / BL21-DE3) OX=469008 GN=sucD PE=3 SV=1	FALSE	TRUE	FALSE	55.7093	14	35	13	1.65465e+09	64.55
High	A0A140N2T1	50S ribosomal protein L6 OS=Escherichia coli (strain B / BL21-DE3) OX=469008 GN=rplF PE=3 SV=1	FALSE	TRUE	FALSE	80.226	14	48	13	2.17031e+09	48.86
High	A0A140NB56	Bifunctional glucose-1-phosphatase/inositol phosphatase OS=Escherichia coli (strain B / BL21-DE3) OX=469008 GN=agp PE=4 SV=1	FALSE	TRUE	FALSE	67.0702	19	27	19	8.15525e+08	43.61
High	A0A140NFT4	Carbamoyl-phosphate synthase small chain OS=Escherichia coli (strain B / BL21-DE3) OX=469008 GN=carA PE=3 SV=1	FALSE	TRUE	FALSE	47.1204	14	21	14	3.13353e+08	34.18
High	A0A140NBN7	Tyrosine--tRNA ligase OS=Escherichia coli (strain B / BL21-DE3) OX=469008 GN=tyrS PE=3 SV=1	FALSE	TRUE	FALSE	44.3396	17	25	17	5.62945e+08	42.77
High	A0A140N626	DNA gyrase subunit A OS=Escherichia coli (strain B / BL21-DE3) OX=469008 GN=gyrA PE=3 SV=1	FALSE	TRUE	FALSE	19.3143	15	24	15	3.04702e+08	37.61
High	A0A140N9Q3	GMP synthase [glutamine-hydrolyzing] OS=Escherichia coli (strain B / BL21-DE3) OX=469008 GN=guaA PE=3 SV=1	FALSE	TRUE	FALSE	37.3333	16	24	15	1.72918e+08	26.93
High	A0A140N1Y4	L-threonine 3-dehydrogenase OS=Escherichia coli (strain B / BL21-DE3) OX=469008 GN=tdh PE=3 SV=1	FALSE	TRUE	FALSE	49.2669	14	32	14	1.4497e+09	47.99
High	A0A140NGG3	Two component transcriptional regulator, winged helix family OS=Escherichia coli (strain B / BL21-DE3) OX=469008 GN=arcA PE=4 SV=1	FALSE	TRUE	FALSE	54.6218	12	22	12	1.20874e+09	42.61
High	A0A140NDA6	Thioredoxin reductase OS=Escherichia coli (strain B / BL21-DE3) OX=469008 GN=trxB PE=3 SV=1	FALSE	TRUE	FALSE	71.028	14	22	12	9.38969e+08	43.03
High	A0A140N4S7	Glutathione S-transferase domain protein OS=Escherichia coli (strain B / BL21-DE3) OX=469008 GN=sspA PE=3 SV=1	FALSE	TRUE	FALSE	64.1509	12	28	12	2.57814e+09	54.49
High	A0A140NBF2	EIIAB-Man OS=Escherichia coli (strain B / BL21-DE3) OX=469008 GN=manX PE=4 SV=1	FALSE	TRUE	FALSE	46.4396	15	25	15	5.52383e+08	23.11
High	A0A140NF15	Isocitrase OS=Escherichia coli (strain B / BL21-DE3) OX=469008 GN=aceA PE=4 SV=1	FALSE	TRUE	FALSE	44.7005	15	20	15	632629602	39.83
[truncated: 1,606 more rows]
