# Supplementary material for: Living material assembly of bacteriogenic protocells
Source: Research Square preprint supplement (doi:10.21203/rs.3.rs-959347/v1), 2021-11-10
Supplement: Supplementary file 2 [file bad25da8b9c3b6a98b74a6e0.docx]

**Methods**

**Materials**

The following chemicals were used as received: poly(diallyldimethylammonium chloride) (PDDA, Aldrich, 20 wt.% in H2O, Mw = 8.5, 100-200, or 400-500 kDa), adenosine 5/ triphosphate (ATP), uridine-5'-triphosphate (UTP), fluorescein isothiocyanate (FITC), rhodamine B isothiocyanate (RITC; mixed isomers), FITC-CM-dextran (Mw = 4, 70, or 150 kDa), FITC-dextran (Mw = 4000), poly(allylamine hydrochloride) (PAH, Mw = 50 kDa), bovine serum albumin (BSA), sulforhodamine B (Sul-RhB), calcein, Nile Red, DAPI, 8-hydroxypyrene-1,3,6-trisulfonic acid trisodium salt (HPTS), β-D-galactopyranoside (RBG), lysozyme from chicken egg white (≥90 %), melittin from honey bee venom (≥85%, HPLC), deoxyribonucleic acid (low molecular weight from salmon sperm), deoxyribonucleic acid (DNA) sodium salt from Escherichia coli strain B (Genomic, unsheared), histone from calf thymus (Type II-A, Mw = 14.0 kDa, lyophilized powder), ethylenediaminetetraacetic acid (EDTA), pyruvate kinase, phosphoenolpyruvate, adenosine diphosphate (ADP), dimethyl sulfoxide (DMSO), glutaraldehyde, sodium cacodylate trihydrate, Tris(hydroxymethyl)aminomethane, Tris-base, glycine, sodium dodecyl sulfate (SDS), anti-GFP (rabbit) antibody, carbenicillin, Millipore® PVDF Membranes, Tween, SiO2 microspheres (2 μm), polystyrene (PS) beads (1 μm), PS beads (3 μm), PS beads (5 μm), amine-modified PS beads (2 μm), Carboxylate-modified PS beads (2 μm), (3-Aminopropyl)triethoxysilane (APTES), Trimethoxy(octadecyl)silane, Tri(N-acetyl-D-glucosamine) (NAG3), 3-(4-octadecyl)benzoylacrylic acid (OBAA), Luciferase from Photinus pyralis (firefly), D-Luciferin, Propylene glycol methyl ether acetate (PGMEA), BCA Protein Assay Kit, 1,4-dithiothreitol, 2-mercaptoethanol, peptone from casein and other animal proteins, glucose, peptone and yeast extract were purchased from Sigma-Aldrich. SYTO 9, propidium iodide (PI), Dil Stain (1,1'-dioctadecyl-3,3,3',3'-tetramethylindocarbocyanine perchlorate ('DiI'; DiIC18(3)), DNase I (DNase 1 buffer and MnCl2 solution were included), Molecular Probes EnzChek Lipase Substrate (green fluorescent, 505/515 Substrate, Lipase), Molecular Probes EnzChek Protease Assay Kit (green fluorescence, 100 to 1000 assays Kit), MTT (3-(4,5-dimethylthiazol-2-yl)-2,5-diphenyltetrazolium Bromide), Nupage Sep Tris-glycine gels 4-15 wt%, Expressway™ Mini Cell-Free Expression System kit, Qubit dsDNA BR Assay Kit, Qubit RNA HS Assay Kit, Z'-LYTE™ Kinase Assay Kit - Ser/Thr 5 Peptide and DyLight™ 550 NHS Ester were purchased from Thermo Fisher Scientific. 2-[methoxy(polyethyleneoxy) propyl] trimethoxysilane (PEGsilane) was purchased from ABCR GmbH & Co. KG, 90%). Fluorescein diphosphate was purchased from Insight Biotechnology. QIAprep Spin Miniprep Kit (MINIPREP®) was purchased from Qiagen, UK. EnzyChromTM Glycolysis Assay Kit was purchased from BioAssay Systems, actin protein (rhodamine, actin-RhB, rabbit skeletal muscle, >99%) was purchased from Universal Biologicals Ltd. Free fatty acid Assay Kit was purchased from Abcam. Carboxymethyl-dextran (CM-dextran, Mw = 70 kDa) was purchased from Carbosynth. Single-stranded DNA oligonucleotides (23 nucleotides in length, GTT AGC AGC CGG ATC TCA GTG GT) with 3/-TAMRA or 3/-FAM (ssDNA-FAM) modifications were purchased from Integrated DNA Technologies Inc., Belgium. The oligonucleotides were HPLC purified and freeze--dried by the supplier. Oligonucleotides were used as provided and dissolved in nuclease-free buffer (50 mM Tris-HCl, 100 mM NaCl, pH 7.4) to give stock solutions of 100 μM. Skimmed milk was purchased from local supermarket. Ethanol, methanol and toluene were obtained from the chemical store in School of Chemistry, University of Bristol, UK. Luria-Bertani (LB) agar plates and broth, x2 YT agar plates and broth , 2% agarose gel and phosphate-buffered saline (PBS) were obtained from general laboratory supplies of School of Cellular and Molecular Medicine, University of Bristol, UK. All Bacteria strains, *Escherichia coli* (*E. coli*; strain BL21(DE3) orstrain Rosetta™(DE3)), *Pseudomonas aeruginosa* (*P. aeruginosa*; strain PAO1), and *Staphylococcus aureus* (*S. aureus)* were provided by the group of Dr. James Spencer, School of Cellular and Molecular Medicine, University of Bristol, UK. Purified eGFP protein and purified mCherry protein was provided by Angelique Coutable from the group of Dr. J. L. Ross Anderson, School of Cellular and Molecular Medicine, University of Bristol, UK.

**Preparation of coacervate micro-droplets**

Typically, positively charged micro-droplet dispersions were prepared at a PDDA/ATP monomer molar ratio of 2 : 1 by adding an aqueous solution of ATP (20 mM, pH = 8.0) to the same volume of an aqueous solution of PDDA (monomer concentration, 40 mM; pH = 8.0) with molecular weights of 8.5, 100-200 or 400-500 kDa. The dispersions were centrifuged (Eppendorf microcentrifuge 5415D) under 15,000 rcf for 5 min, and then re-dispersed with a pipette before use. Similar procedures were used to prepare PDDA/UTP coacervate micro-droplets by adding an aqueous solution of UTP (20 mM, pH = 8.0) to the same volume of an aqueous solution of PDDA (monomer concentration, 40 mM; pH = 8.0) with molecular weights of 8.5.

**Bacterial cultures**

The following bacterial cultures were used: *Escherichia coli* (*E. coli*; strain BL21(DE3) orstrain Rosetta™(DE3)) and *Pseudomonas aeruginosa* (*P. aeruginosa*; strain PAO1). Typically, glycerol stocks (kept at -70 °C) of bacteria were freshly streaked on agar plates (1.6% agar) once a month. Single colonies taken from the agar plate were grown overnight in culture broth under 37oC and 500 RPM. For *E. coli* BL21(DE3) and *P. aeruginosa*, Luria-Bertani (LB) agar plates and broth were used, while x2 YT agar plates and broth were used for *E.coli* Rosetta™(DE3). The overnight cultures were regrown by diluting 100 : 1 in fresh LB broth (grown to an optical density (OD) of 0.3-0.5 at 600 nm), then chilled in ice for 30 minutes and centrifuged (at 4 °C and 4000 RPM) for 5 minutes, followed by transfer to the medium used for the experiments.

**Coacervate droplet-mediated compartmentalization of bacterial colonies**

An aqueous coacervate dispersion (typically PDDA/ATP or PDDA/UTP, concentrations as above) was centrifuged and half of the volume of supernatant removed (typically 50 μL) and added to a sample tube containing a solution (10 μL) of a single strain of bacteria (*E. coli* or *P. aeruginosa*; OD600 nm = 20) or a suspension of both *E. coli* and *P. aeruginosa* (OD600 nm = 20; OD*E.coli* : OD *P.aeruginosa* = 2 : 1). The mixture was then added to the coacervate dispersion, mixed gently with a pipette to redisperse the coacervate phase into micro-droplets, and the bacteria-containing suspension incubated for 3 min at room temperature. Alternatively, 40 μL of a re-dispersed coacervate solution was removed and added to the cavity of a PEGsilane-functionalized O-slide. After settlement of the droplets for 3 min, 5 μL of bacteria (OD = 20) was added to coacervate droplet suspension.

**Zeta potential and contact angle measurements**

All zeta potential measurements were performed using a Malvern Zetasizer Nano‐ZS instrument equipped with an internal Peltier temperature controller. Samples were injected into a disposable zeta cuvette and experiments carried out at 25oC. Contact angle measurements were performed using KRÜSS Drop Shape Analyzer DSA100 instrument. All samples were dried and coated on the flat glass surface. Typically, the water drop volume was 2.0 μL.

**Fluorescence-activated cell sorting (FACS)**

FACS experiments were carried on a BD LSRFortessa™ X-20 cell analyzer with BD FACS Diva software. 200 μL of a coacervate or coacervate/ssDNA-TAMRA droplet suspension was added to the FACS tube, and 2 μL of a single strain of bacteria or mixture of bacterial strains (initial OD = 20, final OD = 0.2 OD), or a bacterial lysate were added. For samples with dyes, the final dye concentrations were: ssDNA-TAMRA (2.5 μM), SYTO 9 (0.2 μM), DiI (0.2 μg/mL). Coacervate/ssDNA-TAMRA droplets were prepared by adding 0.5 μL of ssDNA-TAMRA (1mM) to 200 μL of a coacervate dispersion, followed by centrifugation and re-dispersion before use. The following lasers and filters were used: SYTO 9 and eGFP, laser 488, filter 530/30; TAMRA and DiI, laser 561, filter 586/15; mCherry, laser 561, filter 610/20.

**Construction of bacteriogenic coacervate-based protocells**

Reconfiguration of PDDA/ATP or PDDA/UTP coacervate droplets loaded and coated respectively with *E. coli* or *P. aeruginosa* cellsinto cell membrane-enclosed metabolically active synthetic cells was achieved by *in situ* lysis of the captured bacteria. For this, a solution of lysozyme (5 mg/mL in 20 mM Tris-HCl, 2 mM EDTA, pH 8.0 buffer) and melittin (2 mg/mL) was added to 0.05 mL of a suspension of the bacteria-containing coacervate micro-droplets. In some experiments, *E. coli* cultures were pre-treated with lysozyme (20 mg/mL in buffer) for 3.5 h before capture along with *P. aeruginosa* by the coacervate droplets to increase their sensitivity to the subsequent lysozyme/melittin treatment such that both *E. coli* and *P*. *aeruginosa* cells released their contents at similar *in situ* rates during construction of the synthetic protocells. (*E.coli* cells pre-treated in this way with lysozyme did not undergo lysis but were compromised in their cell wall integrity such that they became more sensitive to melittin-induced disassembly). In general, the protocells were left in the lysis solution and fresh samples used for the experiments. Alternatively, excess bacterial lysate and non-lysed bacteria were removed by carefully exchanging the upper layer of the suspension with a supernatant obtained from a corresponding coacervate suspension obtained after centrifugation. The samples were not subjected to extensive washing due to their mechanical fragility and sensitivity to changes in osmotic pressure.

**Bacterial lysis and death ratio determinations**

Bacterial cell lysis ratios (*L*) were determined from measurements of OD600 nm recorded before and after treatment with lysozyme and/or melittin (*L* = OD600 nm (after) / OD600 nm (before)). Bacterial cell death ratios (*D*) were determined by using a tetrazolium salt (MTT) colorimetric assay in which *E.coli* BL21 (DE3) cells before and after treatment with 2 mg/mL of melittin were incubated with MTT in a microdilution plate at 36-37 oC for different time periods. DMSO was added as a formazan dissolvent and the mixtures were measured for optical density or absorbance at 510 nm (OD510 nm, A510 nm; *D* = A510nm (after) / A510nm (before).

**Fluorometric quantification of released proteins and DNA**

To determine the concentrations of eGFP, mCherry and DNA released by bacteria after lysis into the coacervate phase, samples were centrifugated under 15000 rcf for 5 min and the aqueous supernatant removed. The remaining coacervate phase was then disassembled by dilution 1000 times using phosphate-buffered saline (PBS) and the corresponding fluorescence intensities determined by a plate reader. Protein concentrations were obtained from calibration curves using known standards. DNA concentrations were determined by Qubit dsDNA BR Assay Kit (Thakur, S., Weir, B. S. & Guttman, D. S. *Molecular Plant-Microbe Interactions®* **29**, 243-246, (2016)). Standard samples with known concentrations were prepared by using purified eGFP protein (0 - 1 μg/mL; excitation at 400 nm, emission at 510 nm), purified mCherry protein (0 - 1 μg/mL; excitation at 587 nm, emission at 610 nm) and commercial *E.coli* DNA (0 - 1 μg/mL; excitation at 535 nm, emission at 617 nm). All the proteins and DNA were dissolved in PBS and fluorescence intensities recorded by the plate reader.

**Scanning electron microscopy (SEM)**

For imaging coacervate droplets with micro-compartmentalized bacterial colonies, samples of *E.coli* and *P. aeruginosa* were fixed with glutaraldehyde prior to capture. Bacterial cells were washed twice in 0.1 M sodium cacodylate buffer, and then fixed with 2.5% glutaraldehyde in sodium cacodylate buffer (0.1 M) for 2 h. After rinsing with water, 5 μL of the bacteria-containing mixture (OD = 20) were added to 40 μL of a PDDA/ATP coacervate and dropped onto the cut pegylation coverslips that were attached to a SEM sample stage. The sample was incubated for 10 min and then freeze-dried for SEM. The bacteria-lysate containing coacervate droplets were also prepared without fixation. In this case, droplets of the sample were mounted onto cut pegylation coverslips attached to the SEM sample stage and then freeze-dried. All SEM experiments were taken on a Jeol IT300 SEM instrument.

**Quantification of biological components in bacteriogenic protocells**

Bacteriogenic coacervate-based protocells were disassembled by dilution 1000 times using phosphate-buffered saline (PBS). DNA, RNA, protein and lipid concentrations were determined by Qubit dsDNA BR Assay Kit (Thakur, S., Weir, B. S. & Guttman, D. S. *Molecular Plant-Microbe Interactions®* **29**, 243-246, (2016)), Qubit RNA HS Assay Kit (Costales, M. G. et al. *Journal of the American Chemical Society* **141**, 2960-2974, (2019)), BCA Protein Assay Kit (Wiechelman, K. J., Braun, R. D. & Fitzpatrick, J. D. *Analytical Biochemistry* **175**, 231-237, (1988)) and Free Fatty Acid Assay Kit (Drescher, H. K. et al. *Cells* **9**, 1106 (2020)), respectively. The mass of water (Mwater) contained in the protocells was determined by the difference between the wet mass (Mwet) and the dry mass of the protocell (Mdry). The mass of residual components was determined by Mdry – (MDNA + MRNA + Mprotein + Mlipids).

**Proteomics of bacteriogenic protocells**

Bacteriogenic coacervate-based protocells were prepared with *E. coli* BL21 (DE3) and PA01 cellular constituents and washed 3 times with supernatant obtained from a PDDA/ATP coacervate suspension to remove non-associated bacterial proteins. For comparison, a data set was obtained from a binary population of *E.coli* (strain BL21 (DE3; 2 OD) and *P. aeruginosa*(strainPAO1, 1 OD) cells prepared without the coacervate droplets. The mixture was incubated overnight with lysozyme (20 mg/mL in 20 mM Tris-HCl, 2 mM EDTA, pH 8.0 buffer) and then centrifugated under 2000 rpm for 10 min followed by washing with PBS to remove residual lysozyme. The bacterial cells were then lysed by using a freeze-thaw method involving 10 cycles, and then subjected to LC-MS analysis. 
 For Nano-LC Mass Spectrometry, samples were run on a 10% SDS-PAGE gel until the dye front had migrated approximately 1 cm into the separating gel. Each gel lane was then excised as a single slice and subjected to in-gel tryptic digestion using a DigestPro automated digestion unit (Intavis Ltd).

The resulting peptides were fractionated using an Ultimate 3000 nano-LC system in line with an Orbitrap Fusion Tribrid mass spectrometer (Thermo Scientific). Peptides in 1% (vol/vol) formic acid were injected onto an Acclaim PepMap C18 nano-trap column (Thermo Scientific). After washing with 0.5% (vol/vol) acetonitrile 0.1% (vol/vol) formic acid, peptides were resolved on a 250 mm × 75 μm Acclaim PepMap C18 reverse phase analytical column (Thermo Scientific) over a 150 min organic gradient, using 7 gradient segments (1-6% solvent B over 1min., 6-15% B over 58min., 15-32%B over 58min, 32-40%B over 5min, 40-90%B over 1min, held at 90 %B for 6 min and then reduced to 1%B over 1min) with a flow rate of 300 nl min−1. Solvent A was 0.1% formic acid and Solvent B was aqueous 80% acetonitrile in 0.1% formic acid. Peptides were ionized by nano-electrospray ionization at 2.2 kV using a stainless-steel emitter with an internal diameter of 30 μm (Thermo Scientific) and a capillary temperature of 250°C.

All spectra were acquired using an Orbitrap Fusion Tribrid mass spectrometer controlled by Xcalibur 2.1 software (Thermo Scientific) and operated in data-dependent acquisition mode. FTMS1 spectra were collected at a resolution of 120 000 over a scan range (m/z) of 350-1550, with an automatic gain control (AGC) target of 400 000 and a max injection time of 100ms. Precursors were filtered according to charge state (to include charge states 2-7), with monoisotopic peak determination set to peptide and using an intensity range from 5E3 to 1E20. Previously interrogated precursors were excluded using a dynamic window (40s +/-10ppm). The MS2 precursors were isolated with a quadrupole mass filter set to a width of 1.6m/z. ITMS2 spectra were collected with an AGC target of 5000, max injection time of 50ms and HCD collision energy of 35%.

The raw data files were processed and quantified using Proteome Discoverer software v2.1 (Thermo Scientific) and searched against the UniProt Escherichia coli (strain BL21-DE3) database (downloaded November 2020; 4156 sequences) and the Uniprot *Pseudomonas aeruginosa* PAO1 (downloaded November 2020; 5563 sequences) using the SEQUEST HT algorithm. Peptide precursor mass tolerance was set at 10 ppm, and MS/MS tolerance was set at 0.6 Da. Search criteria included oxidation of methionine (+15.995 Da), acetylation of the protein N-terminus (+42.011Da) and methionine loss plus acetylation of the protein N-terminus (-89.03 Da) as variable modifications and carbamidomethylation of cysteine (+57.021 Da) as a fixed modification. Searches were performed with full tryptic digestion and a maximum of 2 missed cleavages were allowed. The reverse database search option was enabled and all data were filtered to satisfy false discovery rate (FDR) of 5%. (see data file at http:/xxxx – TO UPLOAD ON SUBMISSION

**Enzyme and glycolysis activities in bacteriogenic protocells**

Activities of alkaline phosphatase, protease and lipase within the bacteriogenic protocells were determined by fluorescence microscopy at room temperature using fluorescein diphosphate (green fluorescence), EnzChek Protease Substrate (green fluorescence) or EnzChek Lipase Substrate (green fluorescence). An aqueous solution of a single substrate (final concentration, 0.2 mg/mL) was added to a suspension of the protocells and the enzyme-mediated production of the fluorescent output monitored by using confocal microscopy.

The activity of β-galactosidase (β-Gal) in the protocells was determined using the resorufin β-D-galactopyranoside (RBG) reaction test. Time-dependent fluorescence profiles were recorded by fluorescence spectroscopy from a suspension of coacervate droplets (40 µL) containing PA01 and *E.coli* Rosetta™(DE3) cells before and after lysis in the presence of RBG (5 µL, 2 mM) (Ex: 560 nm, Em: 594 nm). The reactions were also monitored by using a widefield (Ex: 545/26 nm Em: 605/70 nm) and confocal microscope (Ex: 560 nm, Em: 571-621 nm).

Glycolysis assays were undertaken using a EnzyChromTM Glycolysis Assay Kit with a conversion of 1 mM *L*-lactate equal to 9.01 mg/dL (90.1 ppm) (Jung, Y., Jang, Y.J., Kang, M.H. et al. *Mol. Cells* **35**, 335–341 (2013)).

**Construction of plasmid pEXP5-NT/deGFP**

The deGFP gene was amplified from *E.coli* Rosetta™(DE3) cells and inserted into plasmid pEXP5-NT/CALML3 (obtained from the Expressway™ Mini Cell-Free Expression System kit, Thermo Fisher Scientific) using ligase-independent cloning to yield the plasmid pEXP5-NT/deGFP (Chiu, J., March, P. E., Lee, R. & Tillett, D. *Nucleic Acids Research* **32**, e174-e174, doi:10.1093/nar/gnh172 (2004)). Primers were designed to facilitate replacement of the CALML3 gene with the deGFP gene. The plasmid retained the ampicillin resistance gene, T7 promoter site, ribosome binding site, and the pUC origin of replication sequence. pEXP-NT/mCherry was sequenced (Scheme 1, Supporting Information) and transformed into *E. coli* BL21 competent cells for amplification. The BL21 cells were isolated by centrifugation and smeared onto an agar plate containing the antibiotic, carbenicillin and incubated overnight at 37 oC. A single colony was removed from the agar and incubated in Luria Bertani (LB) broth with carbenicillin overnight at 37oC. The cells were harvested and the plasmid was extracted from the *E. coli* cells and purified using MINIPREP® (Qiagen, UK) resulting in a final plasmid concentration of 219 ng /µL.

**Endogenous gene expression in bacteriogenic protocells**

The plasmid pEXP5-NT/deGFP (final concentration, 1μg/100 μL), as well as buffer, promoters for T7 polymerases (sequence: TAATACGACTCACTATAGGG) and nutrients from an Expressway™ Mini Cell-Free Expression System kit (Thermo Fisher Scientific) were added to a PDDA/ATP coacervate suspension prior to capture of the bacteria. Added components included; x2.5 IVPS *E. coli* reaction buffer (5 μL; no amino acids), T7 enzyme mix (1 μL), an amino acid mix (1 μL, 50 mM, no methionine) and methionine (1 μL, 75 mM) all per 100 μL of the protocell suspension. No bacterial lysate from the cell-free expression kit was added so that all the gene expression machinery in the protocells was derived from the *in si*tu lysis of the captured bacterial cells. Bacteriogenic protocells were then prepared using the above coacervate/component droplet suspension by *in situ* lysis of the captured *P. aeruginosa* (strain PA01) and *E. coli* (strain Rosetta™(DE3) cells. The samples were mounted on an O-slide for microscopy experiments or used directly for protein electrophoresis and western blot analysis. All experiments were undertaken at 37 oC for periods of 3 h (microscopy) or 12 h (protein electrophoresis/western blot). Samples were initially kept on ice and then raised to a temperature of 37 oC to initiate *in vitro* gene expression. After the first 30 min, a supplement of 2 μL /100 μL of the x2 IVPS Feed Buffer was added.

**Protein gel electrophoresis and Western blot analysis**

For protein electrophoresis, protocell samples were disassembled by addition of 100 mM NaCl to release all proteins from the coacervate phase. 10 µL of the sample solution and sample application buffer were loaded into Nupage Sep Tris-glycine gels 4-15 wt% (Fisher) and separated based on protein molecular weight using a constant voltage of 200 mV for 35 minutes. The gels were washed by water, stained overnight in staining solution under shaking, and then destained by water for 24 h to remove excess dye from the gel matrix background. Western blot analysis was undertaken as follows. After protein electrophoresis, the protein was transferred from the gel using a transfer buffer (containing 390 mM glycine, 478 mM Tris-Base, 13mM SDS, 20 % methanol) onto a methanol-activated PVDF membrane (Millipore) at a constant current of 45 mA for 1 hour. The PVDF membrane was blocked using casein (skimmed milk) for 1.5 h at room temperature and then incubated with monoclonal anti-GFP (rabbit) antibodies (1 µg/ml) (Sigma Aldrich) for 1 h at room temperature. The PVDF membrane was then washed at least 5 times with PBS-Tween (0.1%) with 20 min shaking between each rinse prior to film exposure and development.

***In situ* proto-nucleus formation in bacteriogenic coacervate-based protocells**

Aqueous solutions of PDDA (40 mM, 50 μL), ATP (20 mM, 50 μL), melittin (20 mg/mL, 10 μL), histone (20 mg/mL, 10 μL), DNase 1 (1 U/µL, 5 μL) and MnCl2 (100 mM, 1 μL) were mixed to produce a four-component coacervate. After centrifugation under 15000 rcf for 5 min, 40 μL of the re-dispersed coacervate suspension was removed and added to the cavity of a PEGsilane-functionalized O-slide. *E.coli* cells (OD = 20) were pre-treated with lysozyme (20 mg/mL in 20 mM Tris-HCl, 2 mM EDTA, pH 8.0 buffer) for 3.5 h and mixed with a *P. aeruginosa* colony (OD = 20) at a volume ratio of 2 : 1. The bacteria mixture (5 μL) was then added to the PDDA/ATP/melittin/histone/DNase 1 coacervate phase in the O-slide, and lysozyme and melittin added to give final concentrations of 2 mg/mL. The resulting mixture was sealed with a cover slide and incubated at 37 oC for 1 h to induce cell lysis, capture of the bacterial components in the coacervate droplets, and DNase-mediated fragmentation of the release plasmids into linear sub-strands, followed by addition of 5 μL of 1,4-dithiothreitol (1 mM) and 2-mercaptoethanol (0.5 mM) and incubation for another 1 h to inactive the DNase 1. After incubation, FITC-CM-dextran (10 μL, 10 mg/mL) was gently added to the mixture to induce phase separation of the DNA fragments in the form of a single DNA/histone sub-compartment within the coacervate phase.

**DyLight™ 550 labelling of bacterial proteins**

A bacteria lysate was prepared by adding lysozyme (20 mg/mL in 20 mM Tris-HCl, 2 mM EDTA, pH 8.0 buffer) to a mixture of *E.coli* strain BL21 (DE3) (2 OD) and *P. aeruginosa strain PAO1* ( 1 OD), and incubation overnight. The bacteria were then centrifugated under 2000 rpm for 10 min and washed by PBS to remove lysozyme, and the cells lysed by using a freeze-thaw method involving ten cycles of freezing by liquid nitrogen and thawing in a water bath set at 37oC. 40 μL of DyLight™ 550 NHS Ester (dissolved in DMSO, 1 mg/mL) was added dropwise to 2 mL of the bacteria lysate (in 100mM NaHCO3/Na2CO3 buffer, pH 9.0), followed by stirring for 12 h in the dark at 4 oC. The mixed solution was then placed in a filter bag and dialyzed against phosphate buffer saline (0.01 M PBS, pH 7.4) and then against H2O at 4°C in the dark for 2 days. The resulting solution was centrifugated at 13000 rpm for 10 min to remove any insoluble precipitate and then freeze-dried.

**Partitioning of bacterial proteins in protocells**

DyLight™ 550-labelled bacteria proteins (20 mg/mL, 10 μL) were added to a suspension (40 uL) of bacteriogenic protocells containing a DNA/histone sub-compartment, and partitioning between the proto-cytoplasmic and proto-nucleus regions recorded by confocal microscopy.

**Synthesis of FITC/RITC labeled proteins and polymers**

200 μL of FITC or RITC (dissolved in DMSO, 1 mg/mL) was added drop by drop to 10 mL of a protein or polymer (10 mg/mL, dissolved in 100mM NaHCO3/Na2CO3 buffer, pH 9.0) solution, followed by stirring for 12 h in the dark at 4 oC. After which, the mixed solution was placed in dialysis tubing and dialyzed against phosphate buffer saline (0.01 M PBS, pH 7.4) and then H2O at 4°C in the dark for 2 days. The resulting solution was centrifugated at 13000 rpm for 10 min to remove any insoluble precipitate and then freeze-dried.

***In situ* assembly of F-actin in bacteriogenic protocells**

Remodelled PDDA/ATP coacervate-based bacteriogenic protocells comprising a DNA/histone-enriched phase-separated sub-compartment were prepared as above and an aqueous solution of rhodamine B-labelled G-actin (final concentration, 50 μg/mL) added to the protocell suspension followed by a F-actin-initiator buffer (500 mM KCl, 20 mM MgCl2 in 100 mM Tris, pH 7.5) such that the system was activated by the coacervate ATP. A non-active system was established by preparing the bacteriogenic protocells as above but using UTP instead of ATP as a main component of the coacervate followed by addition of G-actin and the Mg2+-containing buffer. Alternatively, an ATP-generation system (pyruvate kinase (0.2 mg/mL) phosphoenolpyruvate (PEP, 10 mM) and adenosine diphosphate (ADP, 10 mM) was preloaded into the coacervate droplets before protocell construction and G-actin/Mg2+ then added to control intra-protocell cytoskeletal assembly.

**Live cell energization of bacteriogenic protocells**

Bacteriogenic protocells based on PDDA/UTP coacervate droplets and containing a DNA/histone proto-nucleus were constructed as above but using only half of the *P. aeruginosa* colony to give a volume ratio of *E. coli* (OD = 20) : *P. aeruginosa* (OD = 10) of 2 : 1. The resulting protocells were enclosed by an incomplete outer membrane, enabling subsequent uptake of live *E. coli* cells. An aqueous mixture of a lysozyme inhibitor (tri(N-acetyl-D-glucosamine, NAG3, 10 mM, 5 μL) and melittin inhibitor (3-(4-octadecyl)benzoylacrylic acid, OBAA, 5 mM, 5 μL) was added to the protocell suspension (100 μL) and incubated for 0.5 h to prevent any further lysis activity. A colony of live *E.coli* cells (OD = 5, 5 μL) was then added to the protocell suspension and incubated for 10 min to facilitate capture of live bacteria within the cytoplasmic-like region of the bacteriogenic protocells. A solution containing a lysate – prepared by treating a single population of *P. aeruginosa* cells in buffer (20 mM Tris-HCl, 2 mM EDTA, pH 8.0) with lysozyme and melittin (final concentrations, 2 mg/mL for both, 1 h) followed by NAG3 (10 mM, 5 μL, 0.5 h) and OBAA (5 mM, 5 μL, 0.5 h) – was then added to seal the protocell membrane with lipid fragments.

Energization of the living/protocell construct was initiated by addition of glucose (1 mg/mL; Luria-Bertani (LB) broth (peptone (2 mg/mL), yeast extract (1 mg/mL)) to generate ATP inside the living *E. coli* guest cells and subsequently charge the host bacteriogenic protocells with ATP by extracellular secretion. An aqueous solution of rhodamine B-labelled G-actin (final concentration, 50 μg/mL) was then added to the protocell suspension followed by a F-actin-initiator buffer (500 mM KCl, 20 mM MgCl2 in 100 mM Tris, pH 7.5) to activate the self-assembly of a F-actin proto-cytoskeletal network within the bacteriogenic protocells by a self-sufficient mechanism of ATP production.

**Live cell gene expression in bacteriogenic protocells**

Bacteriogenic protocells with entrapped live *E. coli* (strain DH2) cells were prepared as above followed by addition of 5 μL of 1,4-dithiothreitol (1 mM) and 2-mercaptoethanol (1 mM) and incubation for 1 h to inactive the residual DNase 1. Monitoring and analysis of gene expression were undertaken as described above in sections entitled “Endogenous gene expression in bacteriogenic protocells” and “Protein gel electrophoresis and Western blot analysis”.

**Luciferase assays**

ATP concentrations in pure a *E.coli* colony or bacteriogenic coacervate-based PDDA/UTP protocells containing an enzyme-based ATP generation pathway or live *E. coli* cells were determined by using luciferase assays. The reactions were undertaken in 50mM Tris-HCl (pH 7.8) buffer with 1 μg/mL luciferase and 20 μg/mL D-Luciferin. Luminescence intensities were recorded using a plate reader.

**Kinase assays**

For kinase activity assays, bacteriogenic protocells with entrapped live *E.coli* cells were prepared as above. The kinase activity was then determined by a two-step cascade reaction. 1 μL of peptide substrates (Z’-LYTE™ Ser/Thr 5 Peptide, from Z'-LYTE™ Kinase Assay Kit, 0.1 mM diluted by 5X Kinase Buffer) was added to 200 μL of the protocell suspension and incubated for 1 h at room temperature. Then, 5 μL of development solution (from Z'-LYTE™ Kinase Assay Kit, development reagents included) was added and the mixture incubated for a further 1 h at room temperature. 5 μL of a stop reagent (from Z'-LYTE™ Kinase Assay Kit) was then added and fluorescence intensities (Excitation/Emission: 400⁄445 nm, 520 nm) were recorded by a plate reader. Control experiments using bacteriogenic protocells without entrapped live *E.coli* cells were undertaken using the same procedures.

**Assembly of membrane-coated, water-filled vacuoles in bacteriogenic protocells**

40 μL of a suspension of bacteriogenic protocells were placed on an O-slide and the aqueous supernatant phase replaced with distilled water to generate hypotonic conditions.

**Design and fabrication of 3D micropatterned moulds**

Plates of 3D micropatterned moulds fabricated with equilateral triangle or square morphologies (side lengths, 20 μm) were designed using CAD software SolidWorks. The designs were exported to STL ﬁles, converted to print job instructions using Describe, and then the moulds laser printed using a commercially available 3D laser lithography system (Nanoscribe Photonic Professional), which employed a two-photon polymerisation process with a photoresist (Nanoscribe IP-G780) deposited at the focus of the laser beam (780 nm, 100×NA 1.5 objective). The 3D moulds were placed entirely in 25 mL of developer (Propylene glycol methyl ether acetate, PGMEA) and bathed for 20 min to remove unpolymerized excess IP-G780 resin from the outside of the printed structures. Subsequently, the structures were moved into a second beaker containing 20 mL isopropanol for 5 min to remove the developer and then gently blow-dried using a nitrogen pistol.

**Bacteriogenic protocell shaping in 3D micropattern moulds**

Bacteriogenic coacervate-based PDDA/UTP protocells containing a DNA/histone proto-nucleus and living *E.coli* cells were constructed as above and then 50 μL of the protocell suspension carefully placed in the shaped moulds (side length, 20 μm) of a 3D micropatterned plate. Each mould contained approximately one protocell. Blank buffer (x2, without ATP and F-actin, 20 μL) or F-actin buffer (without ATP) along with actin-RhB (20 μL, final concentration, 50 μg/mL) were then added carefully to each mould. After incubation for 30 min, the plates were washed using a supernatant obtained from the initial protocell suspension in order to remove the hydrogelled protocells. The latter were collected and dropped into an O-slide for imaging by confocal microscopy.

**Optical and confocal ﬂuorescence microscopy studies**

Typically, 40 µL of the suspensions were loaded into a PEGsilane-functionalized O-slide (Extended Data Scheme 1). Optical and ﬂuorescence microcopy images were recorded on the samples using a Leica SP5 confocal microscope with an immersion oil ×60 lens, or widefield microscope WFM with motorised stage, adaptive focus control, Leica DFC365FX and DFC420C colour camera. Fluorophores were excited by using speciﬁc ﬁlters with the following excitation (λex) and emission (λem) wavelength cutoffs: FITC, λex = 450–490 nm, cut off 510 nm; RITC, λex = 515–560 nm, cut off 580 nm; Hoechst 33,342, λex = 355–425 nm, cut off 455 nm. Image analysis was performed with Image J software.


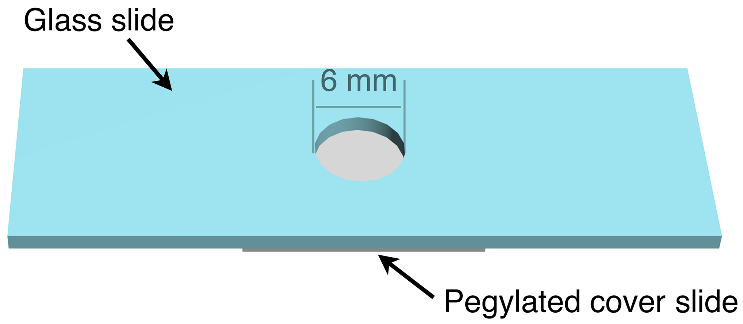


**Extended data: Scheme S1**. Sample holder (O-slide) used for optical and fluorescence microscopy imaging. A microscope glass slide (76 mm x 26 mm) was machined with a hole (diameter = 6 mm) in the center and covered on one side with a pegylated cover slide. The samples were added to the cavity and observed under optical and fluorescence microscopy.

**Pegylation of coverslips**

The coverslips were pre-cleaned with 70% ethanol by sonication for 5 min and then dried immediately with nitrogen and placed in a staining jar. A mixture containing 10 mL of toluene and 200 μL of PEGsilane was added to the jar under argon. After incubation for 24 h, the slides were rinsed individually with ethanol and dried in air.

**Curve fitting**

Time-dependent fluorescence plots of the capture and compartmentalization of *E.coli* or PAO1cells were fitted using a logistic function;

*I* = the fluorescence intensity value (Y axis)

*t* = the time (X axis)

*Is*= the saturation/maximum fluorescence intensity

*I0*= the initial fluorescence intensity

*t1/2* = the t value at the midpoint of the sigmoidal curve. Before *t1/2*, the slope of the curve (fluorescence intensity/adsorption increasing rate) increased; after *t1/2*, the slope of the curve (fluorescence intensity/adsorption increasing rate) decreased.

*k* = the logistic growth rate

According to the function, fitted curves were used to determine *Is*, *t1/2*and *k* for both *E. coli* and PAO1 cells:

For E.coli,

*Is*= 56.4, *t1/2* = 22, *k* = 3

For *P. aeruginosa*,

*Is*= 15.3, *t1/2* = 25, *k* = 3
